# Supplementary material for: Identification of the Key miRNAs and Genes Associated with the Regulation of Non-Small Cell Lung Cancer: A Network-Based Approach
Source: MDPI journal article supplement (doi:10.3390/genes13071174), 2022-06-29
Supplement: s1 [file s1]

**File S2.** Target genes prediction for top ranked 12 miRNAs obtained from databases (mirMap, TargetScan, miRWalk and mirDIP).

| MiR     | Count | Target genes (obtained from 4 databases)                                                                                                                                                                                                                                                                                                                                                                                                                                                                                                                                                                                                                                                                                                                                                                                                                                                                                                                                                                                                                                                                                                                                                                                                                                                                                                                                                                                                                                                                                                                                                                                                                                                                                                                                                                                                                                                                                                                                                                                                                                                                                                                                                                                                                                                                                                                                                                                                                                                                                                                                                                                                                                                                                                                                                                                                                                                                                                                                                                                                                                                                                                                                                                                                                                                                                                                                                                                                                                                                                                                                                                                                                                                                                                                                                                                                                       |
|---------|-------|----------------------------------------------------------------------------------------------------------------------------------------------------------------------------------------------------------------------------------------------------------------------------------------------------------------------------------------------------------------------------------------------------------------------------------------------------------------------------------------------------------------------------------------------------------------------------------------------------------------------------------------------------------------------------------------------------------------------------------------------------------------------------------------------------------------------------------------------------------------------------------------------------------------------------------------------------------------------------------------------------------------------------------------------------------------------------------------------------------------------------------------------------------------------------------------------------------------------------------------------------------------------------------------------------------------------------------------------------------------------------------------------------------------------------------------------------------------------------------------------------------------------------------------------------------------------------------------------------------------------------------------------------------------------------------------------------------------------------------------------------------------------------------------------------------------------------------------------------------------------------------------------------------------------------------------------------------------------------------------------------------------------------------------------------------------------------------------------------------------------------------------------------------------------------------------------------------------------------------------------------------------------------------------------------------------------------------------------------------------------------------------------------------------------------------------------------------------------------------------------------------------------------------------------------------------------------------------------------------------------------------------------------------------------------------------------------------------------------------------------------------------------------------------------------------------------------------------------------------------------------------------------------------------------------------------------------------------------------------------------------------------------------------------------------------------------------------------------------------------------------------------------------------------------------------------------------------------------------------------------------------------------------------------------------------------------------------------------------------------------------------------------------------------------------------------------------------------------------------------------------------------------------------------------------------------------------------------------------------------------------------------------------------------------------------------------------------------------------------------------------------------------------------------------------------------------------------------------------------------|
| MiR-30a | 1076  | <p>ABL2,INO80D,THRB,UGGT1,GABRB2,ABLM1,ZBTB34,CHD9,DSTYK,NR2F2,DEPDC1,PRRC2B,CACUL1,WWC2,ADAMTS3,FOXP2,SLAMF1,EFR3A,SOX4,RHOBTB1,HNRNPUL2,NFAT5,SNBT2,ZKSCAN2,ELOVL6,PANX1,TRIM39,SP4,RNF157,MTR,ZNF770,ZNF544,TGFB R1,MBNL2,VWA3B,PI4K2B,NEDD9,NALCN,CHD2,ATP11C,DNAJC16,CHIC1,YES1,DNAJC 21,TK2,SCARB2,CPEB3,PROCR,EML4,ANKRD17,MKI67,RB1,NAA25,GMPPB,POLQ,BANP, TREML4,SORL1,CRB1,ATXN3,SYT11,ST8SIA4,NEU1,VEZT,HAUS5,DIEXF,MAGT1,FAM20 8A,TSPAN14,BTBD7,SOX11,LTBP1,MYC,MANEA,ARMC10,EDC3,FAXC,NCOR1,MKX,CA SP3,SLITRK6,ARHGAP29,DBT,ATG16L1,PATZ1,RIF1,ROBO1,PCDHGC5,LARP6,RCBTB2,C RISPLD1,BIRC6,RALBP1,CREBBP,MAGED1,PPP1R3A,B4GALT6,CYSLTR2,TRAPPC11,TM EM87B,AP2B1,PKHD1,PNPLA8,FGD4,TBC1D9,RELN,WDR76,BACE1,LHX8,MBIP,ARV1,PI AS2,EP8S,PRKACB,FAM172A,TMEM59,SLC30A1,SLC26A2,MAP3K4,EPM2A,MORC3,LIM A1,GAB1,USP24,TMEM45B,EMB,CDK19,TBC1D23,FCRL5,EYA1,ICK,INVS,PDS5A,SPRED1 ,DMRT1,SYT4,NPR3,COL19A1,SS18,RAB3IP,LIN7A,TMOD2,SLC5A3,SYT2,DOK6,ANKRD1 2,EDM3,FZD4,ARPP19,CDC14B,ZBTB44,CEP63,ERLIN2,CCND2,CPEB4,GATAD2B,FBXW 7,RC3H1,HDAC2,KPNA6,TANC2,SLFN13,SPTLC2,ZHX1,CELF2,TRIP11,RRN3,THUMPDI,T MEM47,TET2,UBQLN1,WNK1,PAQR8,SEMA3D,NDUFA10,DDX6,TBC1D15,NEUROG2,U2S URP,ALDH9A1,DDAH1,EMP2,WDR72,HECTD2,LACC1,EID1,PDE4D,GRIA4,EIF2B5,SLC35 E2B,VPS37A,RORB,EPB41L4B,UVRAG,PAG1,PRDM1,DCBLD2,XBP1,SMAD7,CACNA1D,L ARP1,PD1K1L,FOXN3,USP3,UTRN,GTF2H1,SAMD8,CCT5,ABCC1,PPP3R1,RAPGEF2,RNF1 28,NSL1,SULF2,DLST,PLCXD3,DLGAP2,PPFIA1,RRP1B,CHCHD4,CLSPN,TFCP2,FRS2,PDE 7A,TRMT10B,INTU,ALCAM,DDX18,LIN54,EOMES,FXR1,PCDHGB1,MYBL1,MSANTD4,CT R9,C11orf87,UPK1B,TULP4,PPP2R5E,PLEKHH1,FBXO25,TIGD6,NAP1L4,URB2,MAGEE1,B VES,ZFAND3,OSBPL1A,TNKS,NPPA,CSR1,ROS1,CEP41,AKNA,IREB2,SLC30A9,TBX3,IF T20,NUPL2,CAV1,ISCU,PARP3,RAPH1,SLC5A12,SLC1A3,APOBEC3A,SKA2,PLS3,CSTF2T, PGR,SOX6,LRPPRC,MLEC,BCLAF1,FGF7,PTGR2,GOSR1,TIGIT,RPS23,NPY2R,PCDHAC1,C OLEC12,GOLGA8A,UGT3A1,RRP15,EXOC8,TOMM20,DNAJA2,CNPY2,TNRC6B,SBNO1,PS D3,FOXK1,OSTM1,WASF2,FSTL4,NFIC,MIPOL1,MED13,SPAG9,EEA1,DENND5B,TMEM20 1,SFMBT2,GRB10,PEAK1,RHOBTB3,PREX2,PI15,FLRT3,REV3L,SLC12A7,ADAMTS5,SLC3 0A7,ELAVL1,LOX,CLTC,CEP97,ATP6V1A,SPCS3,SFTPB,PEX26,FGFR1OP2,FKBP5,XRRA1, URM1,TPD52,KCNC2,ZC3HAV1,SAMD12,PDZD11,ACTR8,EIF2S1,ARFGEF1,MRPL30,FGF R3,ZNF148,PRUNE2,RREB1,HS6ST2,CIT,DLG2,MECOM,DHCR24,DMXL2,CYB5RL,RNF19 A,UBN2,FOCAD,NPTX1,SHROOM3,TRAPPC8,ANLN,PPP1R15B,GTPBP10,GJC1,TRIM60,C CDC62,OPHN1,FAM219A,DDX5,RALGPS2,UACA,MYT1L,NOL4,SEN2,LRR58,SES3,RB BP4,ADA,KDM1B,TPRG1,RHOBTB2,LRP2,VPS33A,IQCA1,NUDT11,C1S,TAB2,BEND6,NUP 43,HTR7,GPR85,MOG,HMGNA4,ACTR2,SYT14,TBL1XR1,SLC4A7,LIMCH1,MTAP,DNAJC2,T BC1D4,KIAA0513,FBXO8,PREPL,HXA13,NRCAM,RALA,SLC30A4,SEN6,STRN,AKAP12, CHURC1,GABRB3,ABCC4,ANP32E,ATG12,PRPF40A,SMG1,GBP1,PRKAA2,GOLGA8B,MT HFD2,CHMP1B,SYNRG,RYR3,ZNF704,CBX5,THSD4,ERC1,PRKCA,NUS1,AFF4,MIB1,EIF4 E3,GNAL,IGSF10,REEP1,ITGA2,UBA6,SMAD3,HOMER1,POM121,CD99L2,TMOD1,SNX27, DPP9,RPP30,FOXE3,EDAR,PPP3CA,ABCB9,ARHGEF12,PGP,HLA- E,PDS5B,GLCE,IL10RB,UTP15,PRR14L,GDF6,RNF114,NXPE3,HCCS,SRPRB,ILDR2,ANKRD 28,SUPT16H,EP8S,CDS2,USP40,CALM1,SRA1,PTPN22,AZI2,MAPKAPK3,TAX1BP1,SCOC, CUL3,PLEKHO2,KLF11,SACM1L,NFKB1,GOLGA3,IGF2BP3,UBQLN4,SPICE1,STAT6,SLC1 A2,ANXA7,CISD1,PCDHGA2,PCDHGA8,PRKAR2B,NFYA,SH3GL1,EP300,SRSF11,GCC2,SL ITRK3,RNF150,ELL3,STXB5L,NECAP2,JAG2,HECA,PRPH2,CSMD3,PUM2,MYOF,RALGA PA1,CCDC126,TMED7,ZFH3,HSPH1,GPRASP2,DCAF12,CCDC113,ZC3H14,CCDC74B,COL 24A1,INTS8,SEMA6A,PSIP1,SRP72,CD59,ZNF12,RANBP3L,MMRN1,ACTR3,SLC1C1,KLH L15,RNF144B,EGLN1,PMEL,NHS,TRPS1,UNG,ZNF107,ESYT2,STAM2,TWGS1,TIAM1,KIA A1324L,SLC35F3,GFM1,FOXP1,MAP3K2,PCNP,KLF7,PM20D2,ZNHIT6,SP3,RAB31,PIK3AP 1,ROR1,FREM2,VANGL1,PURB,PGM2L1,OTUD4,ELL2,HS2ST1,ZNF629,AFF1,FMNL3,QSO X1,TMEM245,ATR1N,WDR7,SLC38A2,NFASC,ARHGAP26,FAM49A,SLC7A2,POLR3H,COL5 A2,TSC22D3,MAK16,SOAT1,MACROD2,FOXK2,LIF,DRAM1,PMEPA1,PKD3,ASXL2,ABI2,P</p> |

|         |     |                                                                                                                                                                                                                                                                                                                                                                                                                                                                                                                                                                                                                                                                                                                                                                                                                                                                                                                                                                                                                                                                                                                                                                                                                                                                                                                                                                                                                                                                                                                                                                                                                                                                                                                                                                                                                                                                                                                                                                                                                                                                                                                                                                                                                                                                                                                                                                                                                                                                                                                                                                                                                                                                                                                                                                                                                                                                                                                                                                                                                                                                                                                                                                                                                                                                                                                                                                                                                                                                                                                                                                                                                                                                                                                                                                                             |
|---------|-----|---------------------------------------------------------------------------------------------------------------------------------------------------------------------------------------------------------------------------------------------------------------------------------------------------------------------------------------------------------------------------------------------------------------------------------------------------------------------------------------------------------------------------------------------------------------------------------------------------------------------------------------------------------------------------------------------------------------------------------------------------------------------------------------------------------------------------------------------------------------------------------------------------------------------------------------------------------------------------------------------------------------------------------------------------------------------------------------------------------------------------------------------------------------------------------------------------------------------------------------------------------------------------------------------------------------------------------------------------------------------------------------------------------------------------------------------------------------------------------------------------------------------------------------------------------------------------------------------------------------------------------------------------------------------------------------------------------------------------------------------------------------------------------------------------------------------------------------------------------------------------------------------------------------------------------------------------------------------------------------------------------------------------------------------------------------------------------------------------------------------------------------------------------------------------------------------------------------------------------------------------------------------------------------------------------------------------------------------------------------------------------------------------------------------------------------------------------------------------------------------------------------------------------------------------------------------------------------------------------------------------------------------------------------------------------------------------------------------------------------------------------------------------------------------------------------------------------------------------------------------------------------------------------------------------------------------------------------------------------------------------------------------------------------------------------------------------------------------------------------------------------------------------------------------------------------------------------------------------------------------------------------------------------------------------------------------------------------------------------------------------------------------------------------------------------------------------------------------------------------------------------------------------------------------------------------------------------------------------------------------------------------------------------------------------------------------------------------------------------------------------------------------------------------------|
|         |     | IGA, FOXN2, NEK9, PAFAH2, PTGES3, USP22, EME1, SNIP1, KCNA1, MBOAT2, RPS6KC1, NRAS, CD82, CTDSPL2, RARB, TTC19, ALKBH3, CRTAP, TAB3, RANBP6, VCL, DYRK2, DSCAM, MAPK1IP1L, ITSN2, PKIA, KCNQ5, MIER1, TAF2, UBE2W, ERI1, RBM45, KAZN, LRIT3, SH2D4A, RFX7, RNF138, ATAD2B, UFC1, ZNF326, EGLN3, SLC25A4, LIMD2, USP25, PCDHGA7, ADAR, SH3PX2A, ASAP2, ANGEL2, PRRX1, HPS5, LPIN2, FAM171A1, SMG7, TMPRSS11D, RAB11B, NIPBL, KIF23, ADNP2, CRCP, PTPRD, ZBED4, PCDH18, USP6NL, SLC25A17, THSD7A, GID4, DSC3, PER3, WARS2, COL12A1, PDK4, FAM45A, ANKRD50, GABPB1, ZNRF3, EPHA4, SMAD5, WDR44, DD17, MGA, MFSD6, NAP1L3, USP6, KLHDC1, ADAT2, ZIC4, GNPTAB, GCLM, PCDHA9, HIRA, CDC6, SIX4, NUP50, USP31, MCTP1, ANKH, UNC80, ZKSCAN1, LPP, NUCKS1, VAPB, TBC1D16, POU2F1, BNIP3L, LMAN1, LCLAT1, SNN, SPOCK1, TSN, CPEB2, TNS3, CCDC71L, PRKCQ, EEF2K, COL4A3BP, PTPN4, MED17, ACSL6, ITPKB, TOR1AIP2, MAFG, PAPSS2, LRRC8B, TGIF2, CMTM4, KIF5B, PKD2, STC1, FNBP1, ZBTB40, PARN, RPS6KB1, GREM1, IFNAR1, PCDH9, XPNPEP3, UBE2H, EZH1, RBM12, MS4A1, STC2, SYNJ2BP, HGF, ESCO1, OXSR1, PPP1R2, TMEM104, COL4A4, ACLY, TLL1, BSN, SYNPO2, RSAD1, INO80C, UXS1, ROCK1, TMEM248, TMEM237, RAB39B, ALDH1A3, SIN3A, MBTD1, POSTN, SMURF1, NFKBIE, SEPHS1, ABLIM3, PAPOLG, TAPBP, DOCK9, KITLG, CAST, RASSF8, TMEM170A, FAM13B, TDGF1, AKAP13, DLD, CCDC15, FAT4, ANKRD6, PSMC2, VEZF1, TUB, ZC3H12C, PCDHGA9, ZNF81, TRIM67, TADA2B, STAG1, GBP3, VAV3, WDFY1, PHKB, ACYP2, FNDC5, DGKE, CHD7, GPRC5B, PDP2, PSG1, AKAP9, ATP6V1C1, OTX2, SUZ12, F8, PAIP2, SST, TOP1, OPRK1, AKAP8, RCN2, NPFFR2, BDNF, ERBB4, MEAF6, F2RL2, TXNRD1, PLGLB1, SH3RF1, ELK3, FBLN7, ZNF24, AQP9, HAUS2, FLT1, MOSPD2, NUMB, CACYBP, GALNT13, FGD6, PCLO, STX6, SLC7A11, ICA1L, PLCL1, KIAA1549L, MED12L, YIPF6, FAM20B, GPR158, PCDH17, ONECUT2, TCF4, WIPF2, DCX, GLIPR1, IGF2BP1, ANKRD13C, FLRT2, TNFK, OSGIN2, POU2F2, ALDH1L2, SMAD4, ZNF260, USP38, NUA1, SH2B3, PALM2, AKAP2, UBR3, ZFYVE26, EBF1, NUDT12, DHDDS, KANSL1L, OXNAD1, CDYL, INO80, KAT2B, PIK3R3, ZNF350, LZTFL1, RAPGEF6, CDK5R1, MFSD9, PKM, PCDHGA11, YAF2, YIPF1, BIVM, LYRM2, CNTLN, MEF2C, KLHL4, SH3BP5L, DAZL, HSPE1, SEC61A1, WAC, ATP13A3, GPR62, MSRB3, AGPAT3, ITGA5, C9orf72, TATDN3, RPP14, ZDHHC17, STX7, SEC22C, SERBP1, ARCN1, NDST1, TRIM26, XPO7, PCDHGA3, PCDHGA1, IKZF2, LATS2, OSBPL6, ASAP1, UBE2K, CLCF1, STOM, MCTP2, CASR, MAP3K5, CLDN14, PNMA2, TXLNB, SRXN1, TTC31, YAP1, DOPEY2, RNF170, LRCH1, RAD50, RGS18, MAP1B, KIAA1143, USP1, RNF41, C7orf43, BRWD1, GAD1, PHF14, HOOK1, PLA2G6, CAMK2G, ACOX1, CEP152, CAMSAP1, TAOK1, CCNG2, ATP8A1, C20orf202, DIP2B, GNS, NOX3, HELZ, SLC25A33, RNF125, ABCA1, PTPN21, FOXJ3, MPPE1, MTHFD1L, COL15A1, NUFIP1, AKT3, UBE2J1, RASSF6, RSF1, CREB1, MMP16, C1orf21, PPP1R12B, ZNF37A, LONRF2, CCDC85C, SOWAHC, CLCN4, PEG10, CBFA2T2, ZHX3, ATXN7, PTGFRN, SLC44A1, YOD1, SF3B3, CPD, MEF2D, KDM5A, TGFBR3, LMTK2, LCOR, CREG1, MYO6, FAM129B, KATNAL1, GPRIN3, HNRNPA2B1, ZNF292, OSBP, NUDT21, VCAN, FAR1, TRIM33, DDI2, ETV1, ZNF697, GRB2, RAB11FIP1, RALGAPB, BNC2, MKRN1, SATB2, MRPL19, NAA15, SLC25A43, PPP1R9A, NEDD4, MAPK6, ANKRD10, CDADC1, LGALS1, DZIP1L, CD44, GPRASP1, FRYL, CREBRF, ANKRD40, BCL2L2, IMPAD1, ZEB2, RSNB1, ARNT, ATXN1, GPSM3, FAM98A, KDM6B, USP32, B4GALT5, BDP1, SLMAP, PCDHGB7, SNX18, ZCCHC2, TCF7L1, ZDHHC7, ZNF217, FAHD1, LAP3, RHAG, GPD2, KIF4A, MAR52, LSM14A, FBXO45, SYNCRIP, CEP192, FBXO43, GAS2, TRAK1, ACTR1A, TIMM8A, VBP1, CLCC1, FSTL1, CACNB4, HOXA3, CYP7A1, SYTL2, PITX2, DONSON, DEPDC1B, MECP2, SAMD7, PDE5A, FEM1C, CDC37L1, XPO4, TRAPPC10, TUBGCP4, TBRG1, NACC2, CD109, FAM104A, GABRG1, NAPG, LCP2, DACH1, PLCB1, ZDHHC15, HSDL1, COCH, ATP10D, ARID4A, UST, NCBP1, DCLK1, UBE2G1, NPAT, NBEAL1, ANGPT2, |
| MiR-145 | 154 | RAP2C, SHOC2, ATRX, DDX6, DDX3X, NCOA1, UBN1, CREB1, YES1, NUS1, SSBP2, UBR3, HBP1, TTBK2, ESRRG, RAPGEF4, LRRC2, CCDC88A, AXIN2, TSPAN12, OGT, PDZK1, RUNX1, ZNF687, ASAP1, MACROD2, EBF1, THOC2, CELF2, CNOT6L, CREB5, NFYC, R3HDM1, DLG2, MXRA7, ARHGEF12, CYP51A1, LARP4, MAPK14, TRPS1, GRIK2, HOMER2, NFIB, SOX6, AHCYL2, KCNH8, SLC1A2, PALM2-<br>AKAP2, IREB2, MYO1B, CPQ, MPP3, MBNL2, XIRP2, RAB30, TCTN3, LPCAT3, USP33, QKI, TIAL1, TBL1XR1, PYROXD1, CELF1, KCNJ3, MCU, UBN2, SLC01A2, LRP6, CMBL, PRKCB, NUFIP2, GARS, MBNL1, C11orf54, PAX3, ZNF423, TXNDC16, SLC5A9, ANO6, KCND2, OSBPL8, ZFX, CXCL5, CDK17, KLHL3, ARNT, SLC9A6, PIK3R3, KRT20, PTGFRN, ARRDC4, FRS2, PAX8, STAC2, ST8SIA3, DR1, COPG1, APEX1, TCF4, PTPRD, MALT1, ZFH4, ZFYVE1, DOCK9, NELL1, RICTOR, KANSL3, GMFB, RRAS2, GPD1, STXBP5L, FZD6, CSNK1G1, NOVA1, NBEA, PRDM2, ENTPD1, FLG2, ADAM22, RAB14, ITGB3, ADD2, ELOVL6, HOXB3, ADAMDEC1, S100A7A, METTL13, KCN10, NR6A1, PARVA, CLCN5, BPTF, ZYG11B, TUFT1, DLX3, ASXL2, F11R, RAD52, GF11, CTSS, NFIA, PARK7, NTN4, KHDRBS1, ZNF22, MGLL, ODF2, STAC, CMKLR1, SLC8A3, CBL, SIK2, SERPI                                                                                                                                                                                                                                                                                                                                                                                                                                                                                                                                                                                                                                                                                                                                                                                                                                                                                                                                                                                                                                                                                                                                                                                                                                                                                                                                                                                                                                                                                                                                                                                                                                                                                                                                                                                                                                                                                                                                                                                                                                                                                                                                                                                                                                                                                                                                                                                                                                                                                                                                                                                                                                                            |

|            |     |                                                                                                                                                                                                                                                                                                                                                                                                                                                                                                                                                                                                                                                                                                                                                                                                                                                                                                                                                                                                                                                                                                                                                                                                                                                                                                                                                                                                                                                                                                                                                                                                                                                                                                                                                                                                                                                                                                                                                                                                                                                                                                                                                                                                                                                                                                                                                                                                                                                                                                                                                                                                                                                                                      |
|------------|-----|--------------------------------------------------------------------------------------------------------------------------------------------------------------------------------------------------------------------------------------------------------------------------------------------------------------------------------------------------------------------------------------------------------------------------------------------------------------------------------------------------------------------------------------------------------------------------------------------------------------------------------------------------------------------------------------------------------------------------------------------------------------------------------------------------------------------------------------------------------------------------------------------------------------------------------------------------------------------------------------------------------------------------------------------------------------------------------------------------------------------------------------------------------------------------------------------------------------------------------------------------------------------------------------------------------------------------------------------------------------------------------------------------------------------------------------------------------------------------------------------------------------------------------------------------------------------------------------------------------------------------------------------------------------------------------------------------------------------------------------------------------------------------------------------------------------------------------------------------------------------------------------------------------------------------------------------------------------------------------------------------------------------------------------------------------------------------------------------------------------------------------------------------------------------------------------------------------------------------------------------------------------------------------------------------------------------------------------------------------------------------------------------------------------------------------------------------------------------------------------------------------------------------------------------------------------------------------------------------------------------------------------------------------------------------------------|
|            |     | NA1,SURF6,<br>IDS,ADAM10,NFYA,PCDH17,ZNF131,GPR158,BACE1,SOBP,GOPC,NDST1,ETNK1,SGIP1,C<br>AND1,PCDH8,STK17B,SPRED2,DNM1,ANAPC1,CBL,CCNT2,ZNF584,FGF9,TRAK1,SLAIN2<br>,TAB2,PLEKHG3,YWHAG,PTGDR,ANKHD1-<br>EIF4EBP3,DNAJC24,WDFY1,HIPK3,NONO,SDC4,FBXO33,LILRA2,CASD1,CHL1,SLC1A4,Z<br>NF772,RAP2A,ZC3H6,DTX4,FANCF,CCNJ,DCUN1D1,AP4M1,GIT1,BSN,ZC3H7B,USP6,AFF<br>4,LHFPL2,SMARCA2,BAHD1,CAPRIN1,DOCK9,ITK,SCHIP1,RAB8B,ARHGAP17,ASIC1,AT<br>P6AP2,IRESB2,IFT57,SNX25,MARCKS,ZNF594,HOXB5,HPCAL1,SIRT1,TMEM159,VANGL2,<br>SIM1,KIAA0232,ACSS1,TRIM33,UNC5C,PPP1R3B,RAB1A,MBTPS2,DNER,HECA,POU2F1,F<br>AM91A1,EZH1,FARP1,CEACAM6,PRDM10,USP31,CEP85,BCL2,PTCH1,CDK6,ROBO2,SLC5<br>A3,C4orf46,QDPR,TEAD1,SOS1,E2F7,ACSM3,MAPK1,MKRN1,OTX2,GRHL2,PAK2,OTUB1,<br>CISD1,ATP8A1,GXYLT1,B3GALNT1,SRGAP3,PHF6,CYFIP2,DGKG,VKORC1L1,RCAN3,OT<br>UD7B,DKK2,KANSL2,SPPL3,BICD2,GOLT1B,TBX18,LYPLA1,PLEKHA1,ATF2,GRB10,ARI<br>H1,PGR,REEP5,CHST6,MMP24,DIP2A,ITIH5,WBP1L,PHF3,EPHA8,INO80D,KCTD6,DHX9,S<br>TK38,PLCB1,GNB4,CTSD,TCF4,SLC10A4,RGS1,RIMBP2,SPIRE1,CSNK1D,NMNAT2,HS2ST<br>1,MED13,CACNA1B,DENND5B,MEIS2,FAF2,UNC80,METTL14,PPP2R5C,HBP1,ESYT2,FAM<br>228A,P2RY2,RNF144A,DPP8,NWD1,TRIAP1,USP38,MARK3,SUZ12,SYNC,GTFC3C4,RNF44,G<br>2E3,MTMR3,ELAVL2,NR1D2,UBXN10,C1GALT1,ZNF746,EPHA4,UBE2G2,CDK19,MRPL2,<br>RFC5,NUDT4,SBDS,EPM2AIP1,LAMC1,MYB,RASAL1,KCMF1,KDM5A,DDC,LPGAT1,TTC<br>21B,KCNB1,C20orf96,AGL,NBEAL1,CHMP5,HNF4G,TP53INP1,PCDH11X,EVI5,SPIN1,PAR<br>N,PDPK1,TMOD2,PRKAR2A,AFF1,CUX1,KPNA1,SAMD8,SAR1A,PAPSS2,PTBP3,ZMAT3,T<br>CN2,NKX3-<br>1,TNKS,MIER3,RFT1,ACER2,CYTH3,DGKD,DKK1,EIF5,MYADM,FAM120A,FSTL1,SRSF10<br>,HLA-<br>DOB,EGLN3,WDR36,PRKAA2,DTD1,ZNF830,C1QTNF7,CEPT1,SLC7A6,HTR1F,VGLL2,SLC<br>22A3,LCOR,FAXC,RASSF6,ZNF516,PKIB,RNF213,TMEM245,PKD3,NFAT5,ELFN2,DDX52,<br>RHOA,PTPN1,CHST1,ATR,DSTN,MAK,SSR3,UBE2C,PKD2,CMPK2,SRP19,LCP1,BRWD3,T<br>LR1,RAP2B,APH1B,MAP2K6,ZNF618,MS4A14,ZNF331,NEURL1B,MTMR4,SREK1,ZXDB,H<br>S3ST5,PLEKHG1,FOXQ1,TRPS1,TMX2,TRIM39,CDCA8,THAP6,ZNF763,MAPRE3,NRIP1,TC<br>EA1,WIF1,ZFPM2,ZSWIM7,CMTM4,TMTC1,GJB2,TET3,C21orf91,SSR1,FAM49A,HDAC4,Y<br>KT6,ADAM17,PSMD7,SCN9A,TACC1,ZNF777,KLF5,MMP16,IFNAR1,GNRHR,C2orf83,ARID<br>2,RTN3,SLC38A9,NMRK1,TGIF2LY,ZSCAN2,TULP4,MAFK,UNKL,MYLK4,SRP72,STX12,<br>KIAA1147,GHRHR,SLC24A1,ZNF493,TYRO3,POSTN,HAPLN4,C9orf40,EXTL3,ZNF280B,M<br>RFAP1,PITPNM3,FBXO48,TRPM7,PLCL1,SNAP25,UGGT1,KCTD20,BCL2L14,PHF13,HMGX<br>B4,DCLK1,KATNAL1,HNRNPD,ENTPD4,HOXD10,NSF,PDSS1,DOCK3,AK4,ADAMTS6,WD<br>R35,PYGB,KCNE4,UBN1,EIF5A2,KHDRBS2,PI4KB,SP4,SULF2,LUZP1,AP3S2,ADAM9,CLIC<br>5,YAF2,CORO2A,NR3C1,SUSD5,KIF5A,FAM199X,PNPLA4,ULK4,SNX13,PAWR,RC3H1,GT<br>F3C3,ZNF816,CD274,NAPB |
| MiR-140-3p | 387 | PGPEP1,CREB3L2,NUDT4,RAB11FIP4,ACACA,TRAM2,PRDM2,KIAA0930,RINL,INO80D,F<br>AM172A,WDTC1,FAM50B,KIF26B,CDH1,FCHSD1,CIB2,LETM2,CRTAM,IGHMBP2,COG3,<br>GRIA1,KPNA6,EIF4H,ZDHHC14,ITGA11,TMEM127,MS4A7,COL7A1,PRSS36,RWDD4,PHO<br>X2A,RAB35,ABCG5,MYPN,MTSS1L,ARHGAP12,BTBD9,WDR5,SEC14L5,PPARGC1A,SHR<br>OOM1,SLC46A1,FBXO31,MYOM3,SCAMP4,NCAM1,TMEM88,PTPRN2,CYBB,PEAK1,CD16<br>4,PPP2R2C,HARS,SPRED2,MLLT6,AFAP1,MLXIP,CMTM3,EIF2AK1,PPIB,C6orf222,PIK3R1,<br>ATM,BAG1,NFKB1,INSM2,TAX1BP1,CD82,ARHGDI,COL12A1,ATG9A,MVD,FAM83H,D<br>GKG,QRICH2,EXOC7,TMC7,COQ9,SAV1,COL4A3BP,PHYHIP,DGKE,GRIN2B,TUB,ZBTB7<br>A,QRSL1,POLR2D,ONECUT1,CLDN22,PTPRS,TRIOBP,PFKFB3,NF2,CAMSAP1,ONECUT2,<br>HOXB6,GLIS2,MTA1,EHD1,PITPNM2,RDM1,FAM126A,NPHP3,TMC5,MMP2,SRSF3,PFAS,P<br>CGF3,SURF4,PTPRF,CTDSP2,GRB2,SAP30BP,ARID5A,CACNA1H,MPO,SERPINH1,MRPS2,<br>BCL2L2,GRM1,LSM14A                                                                                                                                                                                                                                                                                                                                                                                                                                                                                                                                                                                                                                                                                                                                                                                                                                                                                                                                                                                                                                                                                                                                                                                                                                                                                                                                                                                                                                                                                                                                                                                                                                                                                                                                                                                                                      |
| MiR-572    | 122 | VEZT,CPEB3,WTAP,NR2F2,KHDRBS2,DACT3,FZD4,CDK19,MATN2,KLF9,NCKAP1,ADA<br>MTS3,PGRMC2,DTNA,UCK2,ICK,TEK,CACNA2D1,TNPO1,SOS1,HNRNPC,LSM14B,TRIM4<br>4,SUMO3,BCL6,DCBLD2,FAM76B,FAM126B,MAFK,BMPR1A,KLF3,E2F8,HIVEP3,PPFIA1,P<br>TCH1,PANK1,MYBL1,PDE4D,FAT3,TET2,TM9SF3,ELAVL2,SPOPL,SOC5,H2AFV,ZEB1,IT<br>PRI,COL11A1,ZNF507,BAZ2B,TBL1XR1,BRWD3,FOXP1,FMR1,LZIC,ELFN2,PBRM1,ZFH<br>X3,IRS1,CNTN3,DMD,PURA,CUL3,MAP3K2,AFF4,GRM5,VANGL1,SMAD5,KCNA1,SLC19A2<br>,CHN2,TMTC3,CTDSPL2,PCDH18,SEN7,UNC80,FAM196A,AKIRIN1,TRIM24,LBR,SEL1L,<br>BACH2,SETD5,RARB,SNAP91,ANO1,RNF38,SMARCA4,SON,CPEB2,RAB5A,PFN6,ESRR<br>G,CDH8,MSI2,PYGO1,FN1,ROCK1,TJP1,QSER1,FGD6,SLC7A11,ATP8A1,BLOC1S5,HELZ,K                                                                                                                                                                                                                                                                                                                                                                                                                                                                                                                                                                                                                                                                                                                                                                                                                                                                                                                                                                                                                                                                                                                                                                                                                                                                                                                                                                                                                                                                                                                                                                                                                                                                                                                                                                                                                                                                                                                                                                                            |
| MiR-144    | 144 |                                                                                                                                                                                                                                                                                                                                                                                                                                                                                                                                                                                                                                                                                                                                                                                                                                                                                                                                                                                                                                                                                                                                                                                                                                                                                                                                                                                                                                                                                                                                                                                                                                                                                                                                                                                                                                                                                                                                                                                                                                                                                                                                                                                                                                                                                                                                                                                                                                                                                                                                                                                                                                                                                      |

|            |     |                                                                                                                                                                                                                                                                                                                                                                                                                                                                                                                                                                                                                                                                                                                                                                                                                                                                                                                                                                                                                                                                                                                                                                                                                                                                                                                                                                                                                                                                                                                                                                                                                                                                                                                                                                                                                                                                                                                                                                                                                                                                                                                                                                                                                                                                                                                                                                                                                                                                                                                                                                                                                                                                                                                                                                                                                                                                                                                                                                                                                                                                                                |
|------------|-----|------------------------------------------------------------------------------------------------------------------------------------------------------------------------------------------------------------------------------------------------------------------------------------------------------------------------------------------------------------------------------------------------------------------------------------------------------------------------------------------------------------------------------------------------------------------------------------------------------------------------------------------------------------------------------------------------------------------------------------------------------------------------------------------------------------------------------------------------------------------------------------------------------------------------------------------------------------------------------------------------------------------------------------------------------------------------------------------------------------------------------------------------------------------------------------------------------------------------------------------------------------------------------------------------------------------------------------------------------------------------------------------------------------------------------------------------------------------------------------------------------------------------------------------------------------------------------------------------------------------------------------------------------------------------------------------------------------------------------------------------------------------------------------------------------------------------------------------------------------------------------------------------------------------------------------------------------------------------------------------------------------------------------------------------------------------------------------------------------------------------------------------------------------------------------------------------------------------------------------------------------------------------------------------------------------------------------------------------------------------------------------------------------------------------------------------------------------------------------------------------------------------------------------------------------------------------------------------------------------------------------------------------------------------------------------------------------------------------------------------------------------------------------------------------------------------------------------------------------------------------------------------------------------------------------------------------------------------------------------------------------------------------------------------------------------------------------------------------|
|            |     | IAA0232,TAOK1,C20orf194,CREB1,TBX18,UBE2D2,KHDRBS3,MITF,ASAP1,SHANK2,SALL1,ABCA1,TP53INP1,ATRX,PDCL,ROBO2,ZNF292,GABBR2,NEUROD1,SCN1A,FRYL,ZEB2,GRSF1,IKZF4,NEURL1B,UBE2G1,PPARGC1B,PTGFRN,BHLHE41,PRDM16,NACC2,GPRIN3,TTN,C3orf58,MGAT4A,RAB2A,PAPD5,MAPK6,ST18                                                                                                                                                                                                                                                                                                                                                                                                                                                                                                                                                                                                                                                                                                                                                                                                                                                                                                                                                                                                                                                                                                                                                                                                                                                                                                                                                                                                                                                                                                                                                                                                                                                                                                                                                                                                                                                                                                                                                                                                                                                                                                                                                                                                                                                                                                                                                                                                                                                                                                                                                                                                                                                                                                                                                                                                                               |
| MiR-126    | 11  | SPRED1,PTPN9,DIP2C,PEX5,CRK,PLK2,SLC7A5,PLXNB2,LRP6,KANK2,RGS3                                                                                                                                                                                                                                                                                                                                                                                                                                                                                                                                                                                                                                                                                                                                                                                                                                                                                                                                                                                                                                                                                                                                                                                                                                                                                                                                                                                                                                                                                                                                                                                                                                                                                                                                                                                                                                                                                                                                                                                                                                                                                                                                                                                                                                                                                                                                                                                                                                                                                                                                                                                                                                                                                                                                                                                                                                                                                                                                                                                                                                 |
| MiR-486-5p | 99  | STK35,DNAJB1,C19orf66,TMEM115,KCNJ15,SMARCD2,GXYLT1,TRHDE,TBL1X,CNKSR2,RAB11FIP4,DOCK3,NFAT5,NCKAP5,DNAJC21,BTBD3,ZZZ3,SLC12A5,HECW2,COL6A6,ST6GALNAC6,PPP3CB,DCBLD2,STK4,ZNF207,FAT3,SEMA3A,CELF2,KCNQ3,SLC4A8,ZNF507,RAP1A,RFFL,ELAVL2,PLXNA4,SCNM1,CAPRIN1,GABRB3,BCORL1,ARMC8,PLAGL2,INPP5K,KDM5B,TXLNG,IPO7,BCL11B,TMOD1,DKK2,CADM1,NFYA,PIK3R1,ACTR3,ST5,HCN1,GOLGA3,ARID4B,BTAF1,ZNF740,GRHL2,CTDSPL2,WIPF3,FGF9,MYLK2,GAB2,RASSF3,SHB,EPB41L1,FBN1,CDK4,POU2F1,TANC1,PIM1,RBM12,AFF3,GPX8,KLHDC10,CXCR5,NFE2L1,MAML2,H3F3B,REV1,SMAD2,ARHGAP44,CSPG5,SP5,FLRT2,RBM7,TMEM178B,GIRIN2A,SLAIN2,C1orf21,ASB4,GPR153,UNC5C,PRRC2C,SRSF3,HAT1,IRX5,CCDC85C                                                                                                                                                                                                                                                                                                                                                                                                                                                                                                                                                                                                                                                                                                                                                                                                                                                                                                                                                                                                                                                                                                                                                                                                                                                                                                                                                                                                                                                                                                                                                                                                                                                                                                                                                                                                                                                                                                                                                                                                                                                                                                                                                                                                                                                                                                                                                                                                                                   |
| MiR-210    | 26  | KCMF1,EFNA3,E2F3,CELF2,ATG7,TET2,GPD1L,ISCU,BAZ2B,KLF7,ELFN2,MID1IP1,SYNGAP1,USP6NL,DIMT1,RAP2B,CPEB2,BDNF,FGFRL1,CYGB,ZNF462,HIF3A,NDUFA4,DTX1,B4GALT5,SCARA3                                                                                                                                                                                                                                                                                                                                                                                                                                                                                                                                                                                                                                                                                                                                                                                                                                                                                                                                                                                                                                                                                                                                                                                                                                                                                                                                                                                                                                                                                                                                                                                                                                                                                                                                                                                                                                                                                                                                                                                                                                                                                                                                                                                                                                                                                                                                                                                                                                                                                                                                                                                                                                                                                                                                                                                                                                                                                                                                 |
| MiR-130-b  | 592 | RYBP,NAV2,ETV3,RBM33,SYT2,UHMK1,GABRB2,MYO10,TGFBR1,VCIPI1,ZFAND5,IL6ST,RMND5A,RNF11,TNRC6C,RAB14,STOX2,SCUBE3,SPRED1,CBX6,TBC1D12,KLHL21,HLF,SLC2A1,FAM107B,DSEL,CD2AP,UGT8,BTBD7,COX7A2L,PTPRM,PRKACB,RALBP1,CHIC1,FYCO1,POU6F1,TNPO1,BIRC6,EFR3A,SLC24A3,HOXB3,MDFIC,SLC25A12,SUV39H1,PLEKHF2,BTBD3,ANKRD12,TP63,LYSMD2,NEDD4L,ROBO1,NRARP,FAM19A1,VPS13D,SELL1L3,CPEB3,CENPO,CYLD,ATXN7L1,PAX6,SRSF2,RBM17,SOX4,KCNA4,RPRD1A,SMARCD2,MAST2,F3,PSAP,CHD9,CRISPLD1,ATG16L1,NCKAP5,B4GALNT3,PTPRG,DOCK3,ATG14,UBC,MBNL1,JARID2,ATP11A,NFIA,DYNLL2,PHF20,DNAJC16,ARAP2,DEPDC1,RRAGD,MXD1,CDK19,DICER1,TSC1,MDM4,SBNO1,PPP2R5E,MIER3,ARID5B,ITGB8,PPFIA2,EPHA7,UBAP2L,MLEC,PPP6R3,FAM78A,GATAD2B,INHBA,SLC12A5,PFN2,TANC2,TACC1,TNRC6B,ST8SIA5,IGFBP5,SFMBT1,TSPYL2,ENPP6,BMP3,PDE4D,WNK1,KLF3,APPL1,LRP12,FBXO9,PDIK1L,ENPP4,RB1CC1,DCBLD2,SYT10,HIVEP2,ZPLD1,SPY2D1,BTG1,ZDHHC23,MMGT1,CLCN6,SLC2A4RG,CPEB4,FXR1,ZNF3,NCOA1,PEX5L,AKAP1,FAT3,USP28,DCP2,SMOC1,HSPA8,SAMD8,CREB5,MTMR10,PTEN,VPS37A,ZMAT3,PIK3CB,UBE3B,SULF1,RAB9B,CDS1,DDX6,ENPP5,MYBL1,SNPH,BCL2L11,N4BP1,CSNK1G1,KCNB1,SLC43A2,ADAM12,SPOPL,RALGPS2,HECTD1,ZCCHC14,GRID2,KAT7,FERMT2,SLC12A7,TSPAN3,DLG2,HRK,TTYH3,ITGA9,LIN28A,SOCS6,DLG5,GMNC,NOVA2,PCYT1B,SOX5,RUNDC1,RAB10,CNOT6L,FIGN,EPHB4,EXOC5,GGA1,SASH1,TFDP2,NRP1,TMEM9B,SPHK2,SRSF7,PXDN,S1PR1,SLC6A6,CYP2U1,LRP2,INHBB,PPARGC1A,IL15,GRB10,PPARG,RAB34,NOL4,ITPR1,MEMO1,TGFBRAP1,FSTL5,LRRTM2,NABP1,SNX5,FOXF2,TBL1XR1,SLC35D1,ARHGAP12,CD69,RBBP8,PIK3C2A,HEG1,PRUNE2,CLTC,BRWD3,BAZ2A,TRPS1,RALGPS1,ARHGEF12,KLHL15,MOB3B,ITPRIPL2,ACER2,ELL,GRIK2,KLF6,PAFAH1B1,TEX261,FOXP1,CNOT2,ANKRD28,SCML2,TMEM151B,SNX27,PDE3B,TMOD1,MIB1,RDX,BHLHE40,QKI,MPP6,TMOD3,TOB2,HCFC2,RASGRF2,NHS,REEP1,AKIRIN2,ZNF704,HOMER1,KCTD20,ANKFY1,UBXN2B,CUL3,KIT,DIP2A,SOCS5,DIP2C,TSHZ1,AFAP1L1,NCKIPSD,VANGL1,KLF7,CCDC126,LARP4B,CAMSAP2,GMFB,THOP1,STARD13,MPPED2,TSC22D1,INSIG1,TRPC3,MLLT6,LRP1B,KLHDC8A,ACBD5,EGR3,CBFB,ARID4B,YTHDF2,BTAF1,EIF4E3,RPA2,DMRT3,FAM46B,ARHGAP1,RACGAP1,NUS1,PHF3,LAMC1,LZIC,ST8SIA3,UCP3,ERC1,CBLB,SBF2,RAP2C,POU3F2,EPS15,CFL2,SOS2,TRIM2,FMR1,ACSL4,RBM25,MAPK1,FMNL3,BACH2,AFF1,PHACTR4,TFCP2L1,SRSF10,DYRK2,VGLL3,ADCY2,ATRN,RASSF2,KLHL3,ARHGAP35,RARB,OTUD4,CCDC6,KLF13,USP46,MDGA2,MTF1,TBPL1,SLC9A2,SIX4,FUT9,IPCEF1,USP8,ZNF609,NEK9,MCTP1,NAP1L3,RFX7,ZADH2,PTPRD,CEP55,SH3PXD2A,TEX2,LBR,CEP170,CNOT7,ING1,MUM1L1,MFSD6,CDH20,THSD7A,UBE2W,PTGES3,FASTK,PMEP1,WRN,ERBB3,NPEPL1,HPRT1,BAG5,PURG,ACVR1,KCNJ10,KDM2A,PIGA,AR,ZFP3,MAFG,FAM20B,CCDC71L,ERBB4,EPB41L1,CCND3,ZC3H12C,PLLP,QSER1,UGCG,GPCPD1,CC2D1B,RASSF3,PNRC1,ANKRD52,SATB1,TACC2,CSNK2A1,RASAL1,RAB5B,DNM2,ZNF784,E2F2,CCDC88A,ITPK1,STC1,SPOCK1,NR3C2,COG5,UNC13A,ATP2B2,CDKN1A,WDFY3,TGOLN2,TGFB2,ZNF800,TANC1,TAF4,VMP1,CPEB2,EOGT,FAM13B,TAF4B,LRP4,LDLR,FANCA,CSF1,USP33,R3HDM1,FAM13A,RAB12,MAP3K9,FIBIN,SNX2,CASD1,MED12L,TMEM63B,CPEB1,MET,RAB5A,CAST,GPR158,KBTBD8,WASL,RNF38,PTPN4,OTUD3,GJA1,WDR47,TGFBR2,MTMR9,DGKE,FBXO28,TAOK1,IGF2BP1,NAA30,CLCN5,VPS37B,RAB30,RNF213,RAB1A,HIPK3,KCNN3,AGPAT3,SERBP1,MTMR12,EFNA5,BTF3L4,BAZ1A,PRKG1,PELI1,ZDHHC2, |

|          |     |                                                                                                                                                                                                                                                                                                                                                                                                                                                                                                                                                                                                                                                                                                                                                                                                                                                                                                                                                                                                                                                                                                                                                                                                                                                                                                                                                                                                                                                                                                                                                                                                                                                                                                                                                                                                                                                                                                                                                                                                                                                                                                                                                                                         |
|----------|-----|-----------------------------------------------------------------------------------------------------------------------------------------------------------------------------------------------------------------------------------------------------------------------------------------------------------------------------------------------------------------------------------------------------------------------------------------------------------------------------------------------------------------------------------------------------------------------------------------------------------------------------------------------------------------------------------------------------------------------------------------------------------------------------------------------------------------------------------------------------------------------------------------------------------------------------------------------------------------------------------------------------------------------------------------------------------------------------------------------------------------------------------------------------------------------------------------------------------------------------------------------------------------------------------------------------------------------------------------------------------------------------------------------------------------------------------------------------------------------------------------------------------------------------------------------------------------------------------------------------------------------------------------------------------------------------------------------------------------------------------------------------------------------------------------------------------------------------------------------------------------------------------------------------------------------------------------------------------------------------------------------------------------------------------------------------------------------------------------------------------------------------------------------------------------------------------------|
|          |     | <p>KIAA1217, LNPEP, ABCA1, LRP8, STT3B, KIAA1210, RBM20, TGFA, UBE2D2, ATP13A3, MAT2B, BLCAP, FYN, INO80, STX7, UBE2D1, PITPNM2, MYT1, CCDC85A, SLC13A2, DENND1A, PHACTR2, FRMD6, E2F7, SZRD1, NHLH2, ABHD3, ZNF711, BAHD1, CCT6A, ZFYVE26, DIAPH3, SPATA2, RNF165, IRF1, LRIG1, TCF4, ARL6IP1, SHANK2, PIKFYVE, TMEM50B, LRP6, CREB1, PHF14, NUFIP2, CLOCK, BMPR2, TOM1L2, NBEAL1, LCOR, SLC39A10, DCUN1D4, ARRDC3, NDRG2, SATB2, CLCN3, PPP1R9A, CAV2, SLC44A1, SPIRE1, MLLT10, TNRC6A, ENAH, GRIN2A, SKP1, PTGFRN, ACSL1, IKZF4, IGSF3, PHF12, FAM104A, B4GALT5, SIK2, TERF2, EFNB2, HOXA5, MAPK6, LMTK2, TMEM167B, GAPVD1, AMPD3, PI4KA, ROCK2, CHMP3, TES, UHRF2, ZEB2, XPO4, CNR1, NRBF2, CMPK1, CDADC1, KIAA1468, HS3ST5, NEUROD1, CCNA2, NPAT, AKAP11, ARHGAP24, PLAA, NACC2, MB21D2, CAPRIN2, DPYSL2, ST18, PTP4A1, YY1, STX12, PLCB1, SYBU, BHLHE41, CLIP1, ZNF217, PRRG4, ESR1, VSIG10, SKIDA1</p>                                                                                                                                                                                                                                                                                                                                                                                                                                                                                                                                                                                                                                                                                                                                                                                                                                                                                                                                                                                                                                                                                                                                                                                                                                                                           |
| MiR-96   | 290 | <p>INO80D, DTNA, CPEB3, SAMD4A, PRPF38B, FRMD4A, ZBTB44, BRPF3, PDLIM5, RCAN2, UHRF1BP1, PRPF4B, CD302, NLRC5, DKK3, UBR5, ACSL3, TBC1D9, SOX11, BTRC, EMC1, HBP1, CACNA2D3, MTMR2, MAGEA10, BIRC6, ELMOD1, ANKRD12, ZNF248, MBNL1, PRKCI, ROBO1, MMD, MPP4, C1QBP, PDS5A, JMY, DICER1, GFM2, EPM2A, TRHDE, TSHZ2, LRRC4, MAN1A1, FOXO1, BCLAF1, SPTY2D1, ALCAM, KLHL28, ZPLD1, RCC2, RBM27, SCN3A, PFN2, MMTG1, LEMD3, ATP2B1, SOBP, LGR6, CYB5R4, RORB, OR11A1, PAQR8, ZMAT3, WASF3, MSTN, PACSIN1, KDM4C, KCNMB2, SKA2, TACC1, AKAP10, NIPA1, SPHKAP, RSL1D1, CCDC82, ZNF33B, REPS2, CCND2, OR51E2, CSTF2T, DNAJC6, ITGAV, CNOT6L, ELAVL2, DNM3, CAPRIN1, DENND5B, SRPK1, SLC4A10, HNRNPA3, LIMCH1, DPYSL3, RREB1, LIFR, CNTN1, MED13, FOXA1, FNBP1L, RALA, HTR7, DLL1, NFIB, FOCAD, HPS3, ITPR1, TLN2, MECOM, ZFC3H1, PDE8A, ELOVL5, ARHGEF3, H2AFV, SLC15A5, MAGEA2, TMEM200A, TMEM26, PTPN1, ST6GALNAC2, SMC2, SPCS3, GCM2, PRKAA2, TBL1XR1, GTPBP10, ZNF208, CALM1, OCLN, SSX2IP, TSHZ3, TAOK3, DLC1, CDK14, CCM2, AK5, ZNF175, PRKCA, PHF3, TRIM2, NEK2, KIAA1109, ABCB10, KHDC1, KIAA0408, FMR1, PIGF, PCNP, HCCS, STXBP5L, IFI44, CUL3, BOLL, USP47, GPR137C, PRR14L, CDS2, ORC4, WDR26, DNAJA4, FUT9, NR6A1, PTGES3, RFX7, ZNF644, DLAT, SENP7, ZNF609, CPM, GEMIN8, SLC19A2, SEC63, MYO5C, VGLL3, PAQR3, ZNRF3, WDR11, BAAT, ZIC1, UNC80, SLC7A2, SOCS4, DGKE, ETF1, CHD7, PCDH9, NR4A2, HAS2, NLGN1, WDR47, UBR1, PLCB4, ZC3H7A, HNRNPA0, WDFY3, BCKDHB, RBFOX1, PAIP2, CCDC144A, CCAR1, NUCKS1, CACNA1B, KLHL31, NAPIB, ABCA5, NXT2, VAPB, ERG, METAP2, DCUN1D1, PGK1, CSPP1, LRP11, ELK4, TCF4, FLRT2, LYRM7, PRKCE, IPO5, RAPGEF6, BRWD1, KCND2, FAM107A, AKT3, TMEM92, RPS6KA3, MAP3K7, LRP8, CREBZF, YLPM1, DIP2B, UBR3, AGPAT5, REV1, USP1, YAP1, ZFY, HERC3, ARL13B, UBE4B, SETD7, TCFL5, PNRC2, STAU2, PRKG1, IQGAP2, LYRM2, CLN8, AGL, HNRNPUL1, ARHGAP44, MARK1, TMEM30A, TIAL1, TTL, GLRA2, SLC9A6, GNG2, CARD8, GNAI1, ADAMTS19, DNAJC5B, NEBL, DCLK1, PDGFRA, RALGAPB, RAD23B, PHTF2, NAA15, UBE2G1, INA, APP, MYEF2, ARID4A, NR1D2, MKRN1, SLC30A5, NDEL1, ZXDA, CYP7A1, PAPP, HNRNPA2B1, HEY1, SLC38A1, STRAP, RSBN1, MAPK6, IL17RD, ZNF665, ERMN, ENAH</p> |
| MiR-200b | 573 | <p>DES11, RNF24, HLF, CBL, CHD9, SLC31A1, FNDC3B, MBNL1, ZFAND5, ZBTB8B, ASH1L, CACNA2D1, ZNF395, ICK, CHD2, UHRF1BP1, NEDD4L, HNRNPU, SPRED1, PSME4, SWAP70, EIF5B, PKD1, KCNJ15, FAM107B, TMEM178A, FRMD4A, ARIH2, TBX5, SORT1, CDH11, KCMF1, ZFH4, DR1, NXPH1, PTPN13, FNBP4, DTNA, NDN, TMCC1, SIAH1, HDHD2, VCIPI1, SDK2, POU6F1, KDELC1, MXD3, MOB4, E2F3, SCD, AMOTL2, ADAMTS3, MYLK, RELN, PCDH19, NCOA2, GAB1, SMAD9, KIAA0895, GPR107, YWHAG, ATP11C, EPS8, PSAT1, PRKACB, N4BP2, C16orf72, SNTB2, SEC23A, GNAQ, NFIA, SLC5A3, ZC3H6, SOX6, KRT80, CELF2, SCN2A, MIER3, GATAD2B, KRAS, HNF1B, FGF18, PTCH1, ARID5B, TBP, RAPGEF1, GREM2, NPNT, PFN2, HIVEP3, CASKIN1, VAT1L, PRDM1, TRIM44, FBXL17, HMBOX1, EFNA1, PLS3, PIK3CB, ELF2, MBD5, CDKN1B, RAB37, RAPGEF2, SMARCD1, ANO6, NANOS1, NOG, PCSK2, FXR1, LIN7B, PISD, CCDC82, PPP6R3, SLC6A11, FBXW7, ZMAT3, CEP41, SAMD8, ETS1, PPP2R5E, CREB5, ADIPOR2, CNN3, CASC4, PLCXD3, TLL2, CCNJ, PIGM, WDR91, KRR1, GPM6A, ZNF532, FAT3, RECK, WASF3, DCBLD2, ARL5A, TBL1XR1, SESN3, ZNF148, RAB3B, GABRB3, HIPK2, RLIM, CEP97, SOX5, ZCCHC14, SLC4A4, FHOD1, NFIC, PAPLN, PDE7B, RABEP1, ANGPTL3, KDM3B, PDPK1, WASF1, RLF, APLP2, UBN2, ZNF236, NFIB, SCN5A, SMARCD1, ZNF365, NOVA2, PSPH, ARL3, SDC2, TLN2, PLXNA4, SMURF2, KCNBI, BAZ2B, PEAK1, FAM219A, HEG1, CASZ1, RDH10, BASP1, PCDH8, MAPRE1, LEPROTL1, ANLN, KDM1B, GRID2, CITED2, SPAG9, SENP5, ITPR1, SLC4A7, LPIN1, FOXK1, DHX36, GATA4, BRWD3, FUBP3, TRAPPC8, NRIP1, EIF2S1, TFAP2A, RALGPS2, ARHGAP19, MCFD2, MED13, NLGN4X, C6orf120, SECISBP2L, ZYG11B, STRN, ELAVL2, LOX, FIGN, ZEB1, ST8SIA3, FREM2, ACTR3, ERC1, DFFA, RAB7A, ELL, CALHM1, AFF4, FOXP1, MPP5, SCN3B, HDAC4, ACVR2A, SLC38A4, FARP1, DMD, PRKCA, CBX5, NPC1, KLF6, BCL9, SAR1B, IGF2R, SLC2A14, FRMD4B, EXOC6B, SH3GL1, SLC16A2, BCL11B, APAF1, AUTS2, PHF6, NCOR2, EP300, GATA2, PRKAR</p>                                                                                                                                                                                                                                                                                                |

1A,FMR1,CUL5,KANK1,SYDE1,NEO1,CHSY1,TSC22D1,YWHAB,PPFIBP1,TRIM2,CHSY3,S  
GIP1,ABAT,HIPK1,SRP72,PRKAR2B,RASA2,ST3GAL2,STARD13,HCFC2,WWC3,INTS8,PDS  
5B,PCNP,TMEM189-  
UBE2V1,TMEM189,FUBP1,TAOK3,S100BPB,CKAP4,EIF4E3,LPAR1,ANKRD28,RAB18,LAM  
C1,NOVA1,RAP2C,CAMSAP2,LRP1B,ZFPM2,GMFB,ANO5,TWISTNB,FUT4,TMOD3,QK1,S  
LC1A2,DYRK2,GNA13,AFF1,RFX7,KLHL3,ASXL3,BACH2,PKIA,TMEM229B,SBF1,MGA,C  
NST,NKD1,CCNYL1,JAKMIP3,TEC,CLIP2,NIPBL,ADCY2,SLK,ANKH,TAF12,ANGEL2,BIC  
D2,CORO1C,DNAJC18,CLASP2,CTNND2,SGCE,USP25,LPIN2,TMEM245,NEK9,CHD1,UBE2  
W,MAPK1IP1L,ZNF423,DPY19L1,DENND5A,SRSF10,CDK13,PTPN12,USP6NL,RHOA,CRT  
AP,BAG5,GAL3ST1,PAQR3,UBE2V1,CSRNP3,MSN,CECR2,OTUD4,RND3,AP1S2,ERI1,MBO  
AT2,ABI2,HS2ST1,CYP1B1,NR5A2,POLK,USP31,DCAF17,FAM8A1,CEP85L,SLC6A17,ERBB  
4,CCDC117,MLLT3,TMEM237,RBFOX1,RNF38,TJP1,ERG,TUBB,ETF1,ELK3,SEPHS1,PKP1,  
AMBRA1,SLC24A4,NRBP1,NUMB,PAIP2,RTF1,AEBP2,NR2C2,ZCCHC24,ZBTB5,DAG1,AT  
P2A2,SFR,ING2,CPT1A,TP73,HAS2,KIAA0355,FLT1,PAPOLG,SPATS2L,SIN3A,LRRTM3,PH  
LDB1,TMEM170A,AFF3,STXBP6,TAF4,PLCL1,MED6,TRIO,PMPCB,ESRRG,KLF10,NAPB,Z  
BTB7C,GRIP1,LRP4,OSMR,GAN,TMEM17,UBE2B,KLF12,VASH1,RBFOX3,FN1,UGCG,NRG  
1,TMEM33,DIRAS2,MBLAC2,ASF1A,FBXO22,MOSPD2,RPS6KB1,ZFX,RASSF8,TAOK1,TC  
F4,ONECUT2,CREB1,ABCC9,ZC3H4,AKT2,C7orf43,CGGBP1,SRGAP1,SETD7,UBE2J1,PRK  
G1,GNAI3,BTF3L4,BAP1,ABCA1,MXI1,ESRP1,FAM126A,FBXW2,COPS8,FAM168B,SRSF1,  
RBM20,ATL2,ASAP1,BRWD1,ELAVL4,LATS2,CASR,WDFY2,MMP16,SLITRK1,ATMIN,RU  
SC2,CEP350,GLCC1,ZNF711,SFXN1,CHST2,KANK2,DUSP1,FOSL2,NCS1,CNOT4,SCHIP1,S  
EMA3F,ORMDL3,LRIG1,MAP3K5,PPP6C,IER5,NUP153,ITSN1,MTFR1,TIMP2,MYT1,INPP4  
A,TIAL1,RANBP10,CDH6,MAP1B,PPM1F,ZNF652,SLIT2,ARIH1,PTPN21,HOOX1,ZDHC17,  
ATP11B,MAP2,STYX,HIPK3,ELK4,NUFIP2,MEF2D,USH2A,IDS,GPRIN3,WDR82,PI4KB,UB  
XN7,NACC2,PTP4A1,SCN1A,ZNF280C,ROBO2,CACHD1,WBP1L,SIX1,SLC23A2,MYO9A,F  
GF12,PIP4K2A,ACTR1A,GALNT2,VLDLR,ARID4A,MSL2,ANK3,IGSF3,SCRT2,IMPAD1,TM  
EM136,GBX2,ARHGAP20,NR3C1,RAB23,BHLHE41,GIT2,BAG6,SLC30A5,GRIN2A,SLC6A1,  
NEDD1,CLIP1,DNMT3B,NBR1,LMO7,DNAJB14,ROCK2,NEGR1,PAPD5,ZNF292,CDK17,BN  
C2,CERS6,MARCKS,PPP1R12B,WNK3,LCA5,CLOCK,WIPF1,BDP1,TRIM33,RAB11FIP2  
TNPO1,FOXP2,SOX11,PLAG1,MAPK8,PFKFB2,RYBP,PDPR,FAM102B,PLA2R1,ZFP90,DNA  
JC21,SYT6,FAM172A,FRMD4A,NCKAP5,SP4,SLC27A6,SS18L1,SORL1,MAP7D2,EMB,AP2B  
1,COL19A1,SNX11,TMEM45B,TPK1,SLITRK6,CPEB3,MBNL2,NCOR1,CTTNBP2NL,POT1,F  
AXC,TMEM38B,ARL4A,DSEL,KCNA4,OLFM3,ZC3H6,TCF12,PNPLA8,ABCA12,TMF1,RTN  
4,C5orf30,PKN2,VEZT,CDH11,TRAPPC11,FAM208A,VASH2,DTNA,CYSLTR2,ZNF395,HEC  
W1,IL6ST,GFOD1,TMCC1,RNF103,DUSP22,RIF1,EDEM1,CHCHD1,CDK19,ERMP1,GEMIN2,  
RGPD5,LIMA1,POU4F1,GLO1,CWC27,MORC3,TMEM59,TNFAIP6,AFTPH,PRKAG2,NAV2,S  
YT4,ZBTB10,F2RL1,FAM19A1,SLC35D3,N4BP2,PRDX3,ST8SIA4,PPP1R3B,C3orf70,MDM4,  
PTPDC1,SLC30A1,PCDHA8,PCDHAC2,NFIA,JAZF1,EDEM3,SPRED1,SWAP70,SREK1IP1,C  
EP63,TOBP1,CCNT2,MEGF9,LEPROT,FAM199X,ARPP19,VCIPI1,ICK,DOK6,XIRP2,CA8,R  
BMS1,ANKRD12,CHML,ZBTB44,RC3H1,GOSR1,ETS1,LARP1,TNRC6B,ARID5B,PAG1,ARI  
D2,WNT5A,MIER3,HBS1L,SOS1,DCAF5,BCLAF1,ZFAND3,ATP2B1,TET2,VTI1A,WNK1,UR  
B1,PANK1,RAB28,FXR1,LRPPRC,TRDN,PDE7A,ZSCAN30,RAPGEF2,MSMO1,VPS37A,SLC  
17A5,IREB2,RAB37,PGR,PRDM1,MS4A7,STK24,CEACAM6,PTEN,HNRNPR,RAB6A,WDR72  
ZNF682,TAF9B,DDHD2,SLC35G3,EPB41L4B,C5,KCNH8,NCOA1,ZHX1,KDM4C,CEP41,AD  
CY9,ERCC6L2,NPTN,FAM122B,INTU,MYO5A,SPHKAP,ISCU,ADNP,FBXL17,HSPA12A,IRS  
2,PARP3,STXBP4,DLGAP2,LTB4R,SESTD1,CELF2,PPP2R5E,SPTBN1,NSRP1,GPC5,TEDDM  
1,ZBTB43,ZNF576,TXNDC16,GIPC2,ELF2,RECK,LRIF1,TBCK,NSL1,IKBIP,NANOS1,FAM21  
6B,PCDHAC1,PCDHA10,CDS1,TOMM20,LGI2,SAMD8,SEMA3A,SLC1A1,RXFP1,CAPZA2,S  
EMA3E,ATG4C,GPR180,TNKS,MSANTD4,MKLN1,STEAP2,EXOC8,UGT3A1,PLCXD3,CNO  
T6L,WASF2,DENND5B,SPIN1,TBL1XR1,ATP2B4,FNBP1L,TRIM25,SOX5,WDR37,NOL4,TL  
K1,PKNOX2,TRIB2,NRCAM,COBL,SYT14,DLG2,C2orf88,SELE,LIMCH1,MAPRE1,MYCBP2,  
KIAA0513,ANP32A,SCAF11,ZSWIM6,UACA,GABRA4,NCAM1,ST8SIA1,ARHGAP12,STX3,  
ZNF148,TRAPPC8,RBBP4,REEP5,TFDP2,SASH1,UBE2E1,KLK10,SRRM1,THOC2,MECOM,C  
PPED1,SLC16A6,TP53AIP1,FBXO8,UHRF1BP1L,RGPD6,GABRB3,DERA,CCPG1,HTR2C,MI  
POL1,ATG12,NFATC3,SDK1,PTTG1IP,MNT,FGF5,METTL21A,SEN2,KDEL2,PREPL,TME  
M54,AKAP12,ABCC4,PCDHA11,FREM1,GPR85,RICTOR,XKR9,LUZP2,HIPK2,RYR3,ARHG  
AP19,MTHFD2,HOXA13,ANP32E,LPGAT1,SMG1,SEMA3C,SYNRG,CSGALNACT2,SMCHD  
1,SESN3,DNM3,SLC4A7,MAP3K2,ST8SIA3,FMN1,STXBP5L,ZFH3,TRPS1,RFX3,TRIM2,SL  
C1A2,PAFAH1B1,BCL11B,STK38,ANKFY1,PIK3R1,NHS,LIX1,PRR14L,AQP4,SPOCK2,FAS,

MiR-205

832

TSHZ1, EXTL2, CDK12, HMGB3, VPS36, INTS6, UNG, GOLGA3, MPP6, LAMA4, TNFSF11, TOX3, MAP2K4, CDC42SE2, PUM2, SMARCA1, PRKAR1A, SGIP1, PIK3AP1, DMRT3, HEXIM1, ETFA, S EMA6A, RALGAP1, ANKRD20A1, TRNT1, IL22RA2, DENND4A, ARID4B, PURA, PNPT1, TSC2 2D1, AP1S1, RAB27B, OR2H1, ITCH, GFM1, ANKRD28, EVI5, DUS4L, SCN3B, FOXP1, PMEL, COL 3A1, RANBP2, OSBPL3, JRKL, GCLC, DST, PLS1, WWC3, PARVA, ESYT2, MALT1, VANG1, KLF 7, HOMER1, PCDHA1, PCDHA4, ARHGEF12, ADAM10, SRSF11, LMO3, ARL1, GMFB, SSX2IP, M PP7, FREM2, FKTN, APC, FGF2, LPP, PURB, SOCS4, CSRN3, DSC3, NR5A2, ZNF641, BACH2, RA P2A, SIX4, ITS2, MACF1, KCTD12, MUM1L1, MYO5C, KIAA0319, NIPBL, MTF1, CEP170, TARD BP, GPBP1, KCNE4, EPHA4, CLDN2, PIGA, CCDC25, NCOA6, SLC7A2, WDR44, PTER, CLINT1, T MC7, FAM196A, MFAP3, CPM, UBE2V1, HPS5, METTL9, KCNQ5, IFT57, GID4, TMPO, CD19, RTC A, GCLM, MED13L, TIA1, NUDT15, UBE4A, ZIC4, C11orf53, THSD7A, ZBTB33, CALD1, SH2D1B, HIRA, CLCA4, SSR1, MAF, GNA13, TFCP2L1, ASXL3, NIPSNAP3A, ARMC1, ANKRD50, SLC38A 2, USP6, CDK13, RASSF2, CEP68, HS2ST1, ZDHHC21, PSMA5, GJA5, FAM35A, MGA, GNPTAB, F AM49A, PCDHA5, PCDHA9, PCDHA7, PKIA, ZBED4, ATAD2B, TRMT5, PDK4, ZNF644, TTC30A, DLAT, MTX3, UNC80, ZKSCAN1, ARL5B, SV2B, RAB22A, ERBB4, TMEM237, CPEB2, KLHL31, P DE11A, ELK3, UBE2H, SPOCK1, PCDH9, OSBPL11, YWHAH, HMGA2, NCOA7, NR3C2, AP4E1, R BM24, MBTD1, RBPJ, ATP6V1C1, CELF1, NRF1, RHOQ, ARFGEF2, PIK3C2B, KLF12, KIAA1549L , GNA12, RNF38, CSDE1, CCDC71L, IPO8, CCND3, CDHR3, RAPGEF4, ANKRD6, RPS6KA6, NDFI P1, ZCCHC6, RBBP5, RHOT1, HMGN2, CHD7, RBM19, GRM7, SHISA5, MCM10, TOP1, VEZF1, M GAT3, SP1, CRNKL1, XPO1, LRRC8B, LINGO1, PLCL1, SNX25, CLDN22, LRRTM3, COL4A3BP, B DNF, PUS7, USP33, GPC4, LHX6, GABRP, NT5DC1, NVL, GPX8, ELF1, ACYP2, RASSF8, TXNRD1, DLD, TMCO3, TARSL2, AKAP9, DUSP16, PTPRC, CCDC15, ITPK1, DARS2, NHSL1, DRAM2, RPS 6KB1, ENOPH1, VAV3, EPG5, SNX14, PYROXD1, COL4A3, TMEM33, UBE2R2, ZNF24, PSG1, AB CA5, MS4A1, KCNJ13, CBLN1, ASB14, ZC3H12C, PCDHA13, PCDHA12, SUZ12, GPR158, KMO, D TL, CPED1, PCDH17, GPCPD1, ANO3, CCDC88A, ICA1L, TRDMT1, FAM20B, NAA50, YIPF6, NLG N1, ONECUT2, NAV1, DCX, HELZ, FAM107A, IKZF2, YWHAZ, SEMA4F, ADAM28, MEF2C, AKT 3, MAP1A, SETD7, EDA, E2F7, SFRP1, ASAP1, EBF1, BAHD1, WIPF2, YAF2, DNAAJC11, ABHD2, C GGBP1, SLIT2, UBR3, TRMT1L, MAP3K7, CTSD, NRK, FBXW2, CAP1, CHMP2B, SLC16A7, ZDH HC17, EIF2B1, CNOT4, NAIP, RAD21, ZNF596, TBC1D8B, PHF14, LRCH1, PPP6C, CAB39, MPV17 L, RRM1, TCF4, HSPE1, YTHDF1, DZANK1, CALCR, ADH7, SLC25A44, CSPG5, PLA2G6, CDH6, MAGEB4, MAP3K5, WAC, JAM3, BAMBI, SMAD2, KIAA1143, MCTP2, ADAP2, CCT6A, AGPAT3 , FAM135A, NEUROD4, SIRT1, SLC01A2, TRERF1, NOX3, MRC1, ASPH, DYNLT1, NUDT12, PCD HA6, PCDHA3, RASSF6, CREBZF, PAH, BRWD1, NUFIP1, SFXN1, AGPS, C5orf63, VPS13A, TME M30A, CEP350, ENTPD1, CDK6, MMP16, NEBL, NUFIP2, CACNB4, RAB11FIP1, SLC23A2, PPP1R 9A, SEMA5A, ZNF664, PPP1R12B, OSBP, GRSF1, LCOR, DCLK1, DAB2, ST18, ARF3, PJA2, TGFB R3, SORBS1, GRIA3, USP12, TNFAIP8, IL17RD, ITGA6, CHMP4B, TMEM167B, PAPD5, SMAP2, M LLT10, KDM6B, RBM22, RNF141, KIAA1549, ME2, TP53INP1, PI4KB, MYEF2, SAP30BP, CDC37L 1, HMGCS1, PHTF2, UNC13C, MEST, DDX58, CD28, PCYOX1, VKORC1L1, WIPF1, GPD2, GFRA1, FAM98A, DDX42, SNX18, CHL1, VBP1, SLMAP, FZD6, COCH, ENOX2, SHISA9, GLRB, SUSP5, D ONSON, CD44, CPNE4, TIMM8A, CEP192, ITGA1, SATB2, LRRCC1, PCDH11X, SLC38A1, ABI1, MECP2, NOD2, SPIRE1, ADAM7, ATXN1, ZNF292, DEPDC1B, ZDHHC15, LCA5, NSD1, MCMBP, CDK17, SLC39A10, THEMIS, NBEA, AZIN1, RAB3GAP2, GPRIN3, UNC5C, ZNF772, PLCB1, SLC1 2A1, TRUB1, USH2A, CAND1, LYPLA1, FAM104A, CPD, RAB11FIP2, ARID4A, NNT, MAOA, AN GPT2, ATP10D, TET1, USP13, RSNB1, ATP8B4, DDX3X, CLOCK, YOD1, KIAA1468, ATRX, NBEA L1, TMEM178B, FEM1C, RAB8B, SLC12A2, IMPAD1, GABRG1
