# Supplementary material for: Identification of the Key miRNAs and Genes Associated with the Regulation of Non-Small Cell Lung Cancer: A Network-Based Approach
Source: MDPI journal article supplement (doi:10.3390/genes13071174), 2022-06-29
Supplement: s1 [file s1]

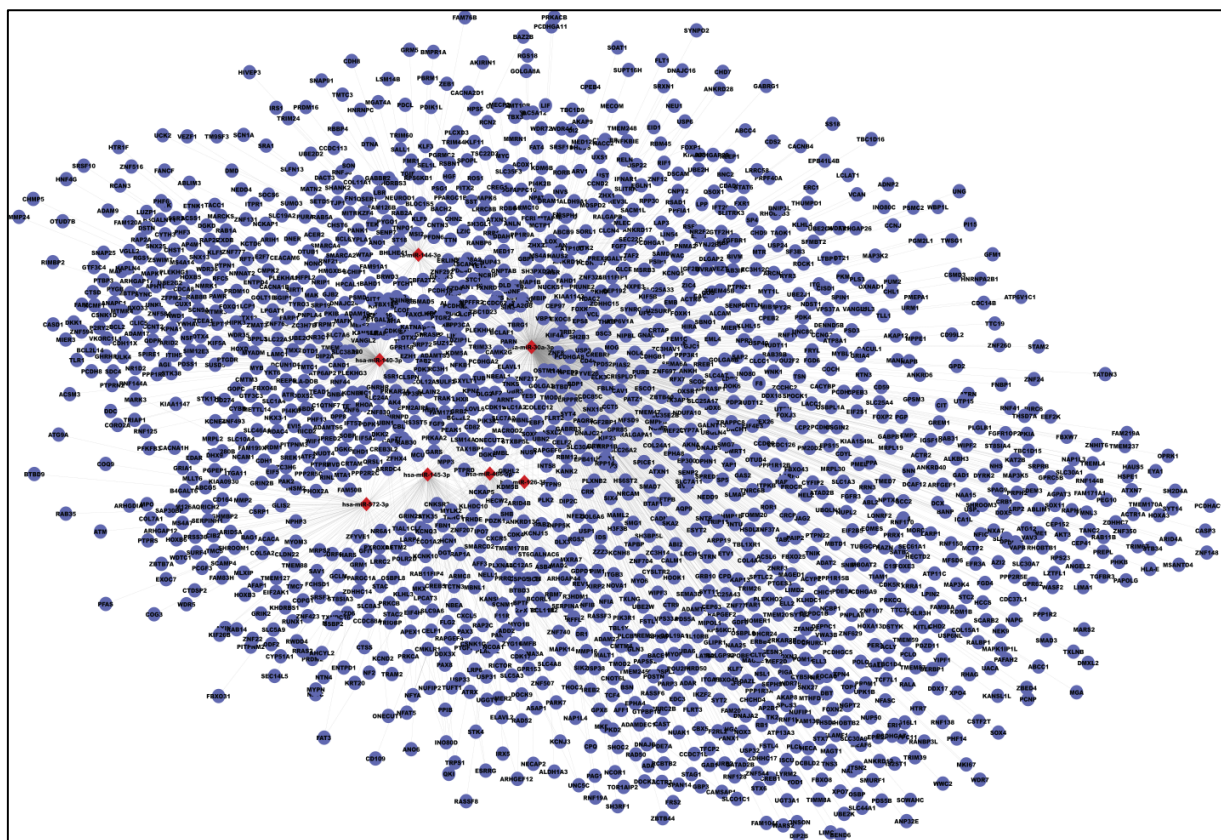

**Figure S4.** MiRNA-target gene interaction network. The target genes were obtained from different databases and the common ones proceeded forward. The miRNA-mRNA network contains 1895 nodes and 2256 edges that were constructed using Cytoscape software. Diamond (red) represents downregulated miRNAs and circle (blue) represents the interacting gene partners.
