# Supplementary material for: Identification of the Key miRNAs and Genes Associated with the Regulation of Non-Small Cell Lung Cancer: A Network-Based Approach
Source: Genes (Basel). 2022 Jun 29;13(7):1174. doi: 10.3390/genes13071174 (PMC9317345; doi:10.3390/genes13071174)
Supplement: Supplementary file 1 [file genes-13-01174-s001.zip]

Archive with 4 entries (4 files):
- S1 File.xls
- S2 File.pdf
- S3 File.pdf
- S4 File.pdf
