# Supplementary material for: Identification of the Key miRNAs and Genes Associated with the Regulation of Non-Small Cell Lung Cancer: A Network-Based Approach
Source: Genes (Basel). 2022 Jun 29;13(7):1174. doi: 10.3390/genes13071174 (PMC9317345; doi:10.3390/genes13071174)
Supplement: Supplementary file 1 [file genes-13-01174-s001.zip › S1 File.xls]

## Sheet: UP 
MIRMAP	MIRDIP	MIRWALK	TARGETSCAN	MIRMAP	MIRDIP	MIRWALK	TARGETSCAN	MIRMAP	MIRDIP	MIRWALK	TARGETSCAN	MIRMAP	MIRDIP	MIRWALK	TARGETSCAN	MIRMAP	MIRDIP	MIRWALK	TARGETSCAN
AFF2	MAPK6	PCDHA1	ZNF791	Gene	Gene Symbol	genesymbol	Target gene	Gene	Gene Symbol	genesymbol	Target gene	Gene	Gene Symbol	genesymbol	Target gene	Gene	Gene Symbol	genesymbol	Target gene
INO80D	TIAL1	PCDHA1	OR4F16	SNTB2	ZBTB18	PCDHA7	KDM2A	INO80D	ELOC	HARS2	ZEB1	GXYLT1	GJA1	HARS2	ZDBF2	CORO6	ISCU	HARS2	FGFRL1
TNPO1	GNAI1	PCDHA1	OR4F3	RAB11FIP4	SLAIN1	PCDHA7	SLAIN1	SLC26A2	DUSP1	PCDHA1	FAM8A1	SLC5A3	DDX3X	HARS2	CMC1	KLHL21	FGFRL1	HARS2	ISCU
MTR	TFG	PCDHA4	OR4F29	IBA57	MIER1	PCDHA7	MDM4	PRLR	SEC23A	PCDHA1	GMFB	G3BP1	SLC12A2	ZMAT2	PLAC8	FAM53B	DIMT1	HARS2	SCARA3
NPTXR	ETF1	PCDHA4	C8orf12	RNF152	ST18	PCDHA9	KLF7	MDM4	NOVA1	PCDHA1	TCEB1	TTBK2	SMG1	PCDHA1	LRRIQ4	HTT	GPD1L	ZMAT2	DIMT1
PIK3C3	TMEM30A	PCDHA6	OR4F21	PIK3C3	SKIDA1	PCDHA9	PAN3	SYT11	FEZ2	PCDHA2	FEZ2	MTR	SMARCA5	PCDHA1	HSPE1	IBA57	KMT2D	ZMAT2	ST3GAL3
STOX2	ENAH	PCDHA7	LECT2	UHRF1BP1	WDR20	PCDHA9	ENPP5	C9orf35	CDK17	PCDHA2	CFL2	IPO9	DMRT1	PCDHA3	SPG20OS	SBK1	E2F3	PCDHA1	FAM89B
RAB3IP	FMR1	PCDHA7	GCM2	C1orf95	ACVR1	PCDHA9	FBXO28	SCUBE3	TOB1	PCDHA7	LHFP	TNPO1	CAPZA2	PCDHA3	C7orf69	GSC	BAZ2B	PCDHA1	ELFN2
ZFAND5	UBE2D3	PCDHA7	CYP3A5	AMOTL1	MEOX2	PCDHA11	MYBL1	C17orf51	EPS8	PCDHAC2	PMAIP1	FOXP2	RBMS1	PCDHA3	FAM173B	NKX3-2	EFNA3	PCDHA1	B4GALT5
TAF8	MORF4L2	PCDHA7	ORC4	STK35	CLIP1	PCDHA11	ACVR1	ZC3H12B	FN1	PCDHAC2	RAP1B	RAB3IP	JAZF1	PCDHA4	C21orf119	C10orf55	ZNF462	PCDHA2	DENND6A
CHD9	PTPRO	PCDHA10	GLRA2	ANXA11	ESR1	PCDHA13	CPEB1	CTNND1	RPS6KB1	PCDHB3	INTS8	NPR3	DNM3	PCDHA4	ALG5	AC005754.1	CYGB	PCDHA2	FAM73B
FZD4	PHF3	PCDHA10	H2AFV	GFOD1	SNX2	PCDHA13	CHST1	FAM199X	MMD	PCDHB14	DZIP1	ATXN1L	CEP350	PCDHA5	KRTAP4-2	FAM109A	B4GALT5	PCDHA2	AC137932.1
SENP1	GTPBP10	PCDHA10	THRSP	TSPAN14	OTUD4	PCDHAC1	PIK3CB	SIN3B	WAPL	PCDHB15	GPM6A	SNTB2	FAM49A	PCDHA6	ASPHD1	RPA1	SUZ12	PCDHA3	MEX3B
KIAA1244	PARD6B	PCDHA11	ZNF441	GXYLT1	KDM2A	PCDHAC1	RTCA	PGAP1	NR5A2	PCDHGA1	AP1S2	AMOTL1	TAB2	PCDHA6	PMEL	C17orf51	MYT1L	PCDHA3	NDUFA4
RNF152	TTBK2	PCDHA11	AP002884.2	DGCR2	AKAP1	PCDHAC2	SYBU	TSC1	ZFPM2	PCDHGA2	KIAA0101	KIAA1244	ANKRD12	PCDHA7	CCL15	PRKAR2A	MIGA2	PCDHA3	SYNGAP1
ZNF681	ACSL3	PCDHA13	GRIA4	ZBTB44	AGO4	PCDHAC2	IRF1	CHST11	MAP4K3	PCDHGA5	HIPK3	REXO1L1	ATRX	PCDHA8	TMEM54	AMFR	GGNBP2	PCDHA4	CYGB
ZNF709	IQGAP2	PCDHAC1	ANKRD36	MAPK8	SYBU	PCDHAC2	RPS6KA5	SARM1	HNRNPU	PCDHGA5	ZFPM2	CALN1	WASL	PCDHA9	CTD-2116N17.1	JOSD2	SYNGAP1	PCDHA4	KMT2D
ZC3H6	TSHZ2	PCDHAC1	C19orf18	RYBP	DLL1	PCDHAC2	MAF	BTRC	PPP2R5E	PCDHGA7	CNEP1R1	SOX11	HOXA13	PCDHA9	TSHB	FAM84A	NR1D2	PCDHA4	USP6NL
AMOTL1	WDR26	PCDHAC1	C22orf34	GBP4	RALBP1	PCDHB4	DYNLL2	MXD1	LPAR1	PCDHGA7	SEC23A	PLAG1	MECP2	PCDHA10	FDCSP	GAS2L1	DENND6A	PCDHA4	BDNF
KIAA1024	SCN3A	PCDHAC1	TYROBP	ZC3H6	ZFPM2	PCDHB5	SBF2	ZBTB34	ZEB2	PCDHGB5	PPP4R2	TBL3	FAM122A	PCDHA10	CLRN3	CAMK1D	NDUFA4	PCDHA4	E2F3
FAM53B	NAA15	PCDHAC2	COA1	SNX30	DDX6	PCDHB6	RNF38	NFAT5	MATR3	PCDHGB5	HMGB3	JMY	ARID4A	PCDHA10	ACYP2	FAM167A	CELF2	PCDHA4	GPD1L
PPP1R3B	CUL2	PCDHAC2	RERGL	CDH11	VGLL4	PCDHB6	TSHZ1	PKHD1	RELN	PCDHGA9	CCNJ	AC093802.1	DST	PCDHA10	ACTA2	PGPEP1	NPTX1	PCDHA5	ZNF462
GAB1	RORB	PCDHAC2	SPATA9	SPECC1L	MPHOSPH9	PCDHB8	EREG	ZBTB44	SYNJ1	PCDHGA9	NR5A2	C9orf35	CAP1	PCDHA10	RP3-369A17.5	DVL1	HDAC4	PCDHA5	PPTC7
FAM110C	MORF4L1	PCDHAC2	RPF2	EDEM1	ATXN1	TAF7	RAI2	XPR1	GNAI3	PCDHGA10	ERRFI1	GALNT4	ORC5	PCDHA11	AC023590.1	C3orf72	GOLPH3	PCDHA5	MID1IP1
CCNT2	DTNA	PCDHAC2	AC106873.4	TBL3	CHST1	PCDHGA3	NFIA	PLAG1	ELAVL2	PCDHGA11	APOO	EIF4EBP2	ZNF644	PCDHA11	C10orf107	NUP210	BDNF	PCDHA5	BAZ2B
PITPNB	GLYR1	PCDHAC2	KHDC1	TAF8	FBXO28	PCDHGB1	SKIDA1	SREK1	HSPA9	PCDHGA11	VASH2	SYT2	RYR3	PCDHA11	ARHGAP15	AP000350.4	ARMC1	PCDHA6	SEPT8
ICK	CYB5R4	PCDHB3	ZNF627	CREB3L2	BMPR2	PCDHGB1	SRSF2	FAM102B	PPM1F	PCDHGA11	SERPINI1	RAB11FIP4	ZBTB44	PCDHA12	KRTAP1-1	RBM33	RUNX3	PCDHA6	RAP2B
TSC1	BIRC6	PCDHB6	DNAJC5B	BTRC	ZNF217	PCDHGB1	ZBTB18	TNPO1	ATXN1	PCDHGA11	PAPD5	CREB3L2	WAC	PCDHA13	DPEP2	AC006132.1	INHBB	PCDHA6	CDIP1
GTPBP1	ZIC1	PCDHB8	SKA2	FLVCR1	ARHGAP12	PCDHGB1	IGF1	G3BP1	ADAMTS3	PCDHGA11	PTHLH	ZKSCAN2	RSBN1	PCDHAC1	CWC27	CAPN6	CAMTA1	PCDHA6	AC010327.2
PRKAR2A	RPS6KA3	PCDHB8	XKR4	FGD4	FMR1	PCDHGA5	WDR20	CREBBP	RND3	HDAC3	RECK	RIPK1	DYNLT1	PCDHAC1	RP11-463J10.2	VSTM2B	KCMF1	PCDHA6	DTX1
PFKFB2	LMBR1L	PCDHB12	ZNF846	NOTCH1	RTN1	PCDHGA5	C7orf60	UHMK1	GPM6A	FCHSD1	GTF2E1	KIAA2018	RAB10	PCDHAC1	DYNLT1	NOL10	NEUROD2	PCDHA7	CPEB2
CBL	CNOT6L	PCDHB13	RP11-169F17.1	DNAJC21	CLCN5	PCDHGB3	HABP4	AFF2	ERRFI1	PCDH1	TMEFF2	MAPK8	ELF2	PCDHAC2	CXCL11	USP36	TET2	PCDHA7	KLF7
HLF	NDEL1	TAF7	FAM26D	PRLR	FOXF2	PCDHGB3	FRZB	BNIP2	ZNF532	PCDH1	YWHAG	SLC31A1	EXOC8	PCDHAC2	AL583828.1	RNF40	FCHSD2	PCDHA7	MEF2A
ATP8A2	UBE4B	PCDHGA3	REEP3	PPARD	RNF38	PCDHGA6	MMGT1	GPATCH2	RECK	PCDH1	RASSF8	PFKFB2	NBEA	PCDHAC2	RP11-181C3.1	SOX11	ZNF407	PCDHA7	TET2
RRAGD	LEMD3	PCDHGA3	CNIH1	CLUAP1	ZFYVE9	PCDHGA6	SH3D19	HK2	NUP153	PCDH12	RAP2C	PRICKLE2	XYLT1	PCDHAC2	TP53AIP1	GPI	SDF2	PCDHA7	CLUH
N4BP2	UBR3	PCDHGB1	C4orf21	DOT1L	ACSL4	PCDHGA7	GJA1	TGFBR1	NFIB	SPRY4	ZFAND6	ENTPD5	PCLO	PCDHB5	AFM	ZBTB34	ACVR1B	PCDHA8	HIF3A
RAB3C	ACTR3	PCDHGB1	C1QBP	ZMIZ1	NPTN	PCDHGA7	VPS37A	SPCS2	TLN2	SPRY4	PRKACB	SERPINB8	ICA1L	PCDHB6	INIP	C1orf95	CPEB2	PCDHA8	EFNA3
GBP4	UBE2G1	PCDHGA4	CTSK	CERK	RAP2C	PCDHGA10	HPRT1	SRGAP3	FOXG1	FGF1	PTPN21	RYBP	LIN9	PCDHB6	IZUMO3	SUSD1	2020-09-08	PCDHA8	ZNF74
VCPIP1	NR6A1	PCDHGA4	GEMIN8	FAM53B	ELK3	PCDHGA10	TMEM55A	DNAJC16	RAP1B	FGF1	C16orf52	SYT11	GABRG1	PCDHB7	ST8SIA6	CDCA4	ELFN2	PCDHA8	CELF2
SLC31A1	SATB1	PCDHGB2	CPA6	DTNA	HBP1	PCDHGB7	PPARG	FZD4	CNN3	ARHGAP26	NOG	RPA1	SEC62	PCDHB7	DNAH7	GPC1	RAP2B	PCDHA9	KCMF1
STK17B	PCNP	PCDHGB2	POLR2C	NAV2	CMPK1	PCDHGB7	CALM2	SREK1IP1	LHFP	ARHGAP26	MMD	DLG3	TTPAL	PCDHB8	IL1B	GNG7	SCARA3	PCDHA9	NFIX
TSPAN14	SOCS4	PCDHGA5	MAPK6	MOB4	CNOT7	PCDHGB7	CCDC126	RAB3IP	CCNJ	ARHGAP26	CNN3	NFAT5	PCNX1	PCDHB13	CCDC163P	TBL3	GIT2	PCDHA10	PCYT2
ABLIM1	RAD23B	PCDHGA5	GNG2	PLAG1	MBNL1	PCDHGC3	DDX6	GBP4	MSN	ARHGAP26	IMMP2L	SEMA3G	C5orf24	PCDHB13	PSMA5	KIAA1967	USP6NL	PCDHA10	ATG7
CALN1	FOXO1	PCDHGB3	UBE2D3	NUDT4	ERBIN	PCDHGC3	ZMAT3	PTPRB	PKIA	ARHGAP26	FLI1	FCHSD1	CSGALNACT2	PCDHB14	ENO3	RCAN1	FAM89B	PCDHA10
RMND5A	SMURF2	PCDHGB3	FAM92A1	TXLNA	PLCB1	HDAC3	CD69	SLC30A1	ZEB1	ARHGAP26	MCFD2	FLVCR1	TIMM8A	PCDHB14	AP003733.1	TBC1D9B	HIVEP2	PCDHA11
KHNYN	WDFY3	PCDHGA7	CTXN1	SARM1	CNOT6	RELL2	ESR1	FAM105A	RPS6KA3	NR3C1	CRKL	SREK1	KMT2C	PCDHB14	ZNF645	PHAX	CCNL2	PCDHA11
FAM105A	ADAMTS19	PCDHGA7	SLC22A10	AFF2	ADCY1	RELL2	RAP2C	DESI1	MGAT2	NR3C1	LBR	SAMD4A	CPEB2	PCDHB14	LINC00998	DSTYK	MID1IP1	PCDHA12
ANXA11	BACH1	PCDHGB4	MAGEA2	HPSE	PAN3	RELL2	PMEPA1	EIF4EBP2	LRP1B	NR3C1	ELAVL2	RAB6B	RRM2B	PCDHB15	CHCHD1	RAB6B	TNPO2	PCDHA12
C3orf72	DNAJC6	PCDHGB4	MAGEA2B	NPTXR	USP48	RELL2	TSC1	SYT4	AGFG1	NR3C1	SESN1	POU6F1	YWHAB	SLC25A2	APOBEC2	PRDM8	RAB27B	PCDHA13
LIPH	RBM27	PCDHGA8	LRP11	BLOC1S6	DOCK3	ARAP3	BTG1	TMOD2	MED13	NR3C1	ZEB2	ABLIM1	SP3	PCDHGA1	ZNF626	DNAL4	IGF2	PCDHA13
G3BP1	SLTM	PCDHGA8	PTN	NFYB	CEP170	PCDH1	FICD	TMPRSS6	CLASP2	HMHB1	YPEL2	BTBD7	CELF2	PCDHGA1	GAN	IGDCC4	HMGCS1	PCDHA13
GABRB2	GLRA2	PCDHGB6	NEDD1	GGA2	SMARCD2	PCDH1	KCNJ10	CAMK1D	YWHAG	YIPF5	SMIM5	TK2	MBNL2	PCDHGA4	C11orf53	RMND5A	HIF3A	PCDHA13
LPAR3	ARL3	PCDHGB6	PKIB	RAB6B	CHD9	PCDH12	PIGA	RBM33	CFL2	YIPF5	MSN	TMEM179	ROCK2	PCDHGA4	PIGY	HK2	MBTD1	PCDHAC1
FOXP2	MED13	PCDHGB6	LETMD1	PGPEP1	USP33	ARHGAP26	TES	WDTC1	REV1	PLAC8L1	KDELC1	TSPAN14	APC	PCDHGA4	C8orf44	TSC1	MFSD14B	PCDHAC1
AL353791.1	ELMOD1	PCDHGB6	RSPH10B	RAP1GAP2	ULK2	NR3C1	C4orf36	SERPINB8	WIPF1	PLAC8L1	RP6-24A23.6	CYS1	MED13L	PCDHGA4	CAP2	KLF9	DSG1	PCDHAC1
CDC42EP3	ITPR1	PCDHGB7	RIT2	NWD1	ROBO1	NR3C1	PURG	CTB-186H2.3	RAP2C	LARS	SLC14A1	CAMK1D	ATRN	PCDHGB2	NDUFB10	C14orf119	TTC13	PCDHAC1
ATP6V0D2	ZNRF3	PCDHGB7	FGF5	CHD2	MLLT10	NR3C1	LDLR	NCR3LG1	PLCL1	LARS	PSAT1	ELOVL6	RALA	PCDHGB2	MYF6	ANKRD13A	KAT6A	PCDHAC1
SLC26A2	DNM3	PCDHGB7	RP11-182J1.16	HIP1	SULF1	NR3C1	ULK2	GGA3	CRKL	LARS	RBFOX3	FAM163A	PDLIM5	PCDHGB3	CCDC144A	RYBP	DTX1	PCDHAC1
ZBTB10	ADCYAP1	PCDHGB7	LIN28B	FAM105B	BTAF1	NR3C1	RRAGD	ZNF248	NOG	LARS	EPS8	ZC3H12B	SRSF11	PCDHGB3	CNPY2	DGCR2	ATG7	PCDHAC2
ZNF333	CSTF2T	PCDHGC3	HDC	EIF4EBP2	WDR47	NR3C1	FNDC4	GRAMD1C	CNEP1R1	PPP2R2B	CEP41	PDPR	MINDY2	PCDHGA8	DMRT1	MFAP4	PSAP	PCDHAC2
AQP5	GPR137C	PCDHGC3	STEAP1B	ERMP1	LCLAT1	NR3C1	CBFB	C3orf70	PTPN21	PPP2R2B	TMOD3	AFF2	MNT	PCDHGA8	C7orf43	UBE2Q1	SH3BGRL	PCDHB2
SLC25A42	MTMR4	PCDHGC3	GLYAT	SYT11	NHLH2	NR3C1	TGFBR2	ATRNL1	SRF	PPP2R2B	MARCKS	FAM102B	MS4A1	PCDHGA8	CCDC178	SNAPC2	CLUH	PCDHB3
GPC1	ARFIP1	PCDHGC3	CSNK1A1L	DESI1	STIM2	NR3C1	HS3ST5	CYBRD1	QKI	PPP2R2B	DNAJB5	PLA2R1	NSD2	PCDHGB6	TRMT61B	DTX4	KLF7	PCDHB4
NTSR1	TMEM243	PCDHGC4	TIAL1	GTPBP1	SHANK2	HMHB1	CHMP3	ARHGAP32	PDS5B	PPP2R2B	XKR8	NCR3LG1	HMGN2	PCDHGC3	PSMD10	HMX3	RUNX1T1	PCDHB6
SORL1	ROBO1	PCDHGC4	NFXL1	ZNF500	LRP8	KCTD16	HBP1	PARP14	NRIP1	PPP2R2B	RANBP10	MRAS	UNC80	PCDHGC3	HAT1	EYA1	SPRED2	PCDHB16
FOXJ2	MMGT1	DIAPH1	NUDT15	MAGT1	C16orf70	KCTD16	ZNF217	CDKN2AIPNL	AP1S2	PPP2R2B	PRDM16	BACE1	PTGER3	HDAC3	CYLC1	ONECUT3	DLX1	PCDHB9
LUZP1	SLC7A2	DIAPH1	DSPP	YKT6	LRIG1	PRELID2	RNF103-CHMP3	ATAD1	SULF1	PPP2R2B	ZNF532	SNX33	TOB1	ARAP3	RP11-67H2.1	SLC5A3	LEPROTL1	PCDHB9
SRGAP3	CACNB4	DIAPH1	STRAP	TSPYL5	ABHD3	PRELID2	NPNT	GRPEL2	NCOA2	PPP2R2B	C6orf120	SLC25A42	KIAA1468	ARAP3	MELK	FBXL19	BICRAL	PCDHB10
DTX4	REPS2	FCHSD1	SUCLA2	USP24	UBE2D1	PRELID2	HOXB1	PTPRG	RANBP10	PPP2R2B	NOVA1	PRRC2B	UBE2R2	ARAP3	AKAP9	DCDC2	CHN1	PCDHB11
RNF166	CDK14	FCHSD1	CCDC82	TBC1D14	VPS37A	PRELID2	ZNF3	ALG10B	TFAP2A	PPP2R2B	LPAR1	THRB	TMEM131	ARAP3	YBX3	TMEM187	EPB41L1	PCDHB14
LL22NC03-63E9.3	ELAVL2	ARAP3	MORF4L2	PRRC2B	RPS6KA5	PRELID2	KALRN	MEGF9	MARCKS	PPP2R2B	USP27X	HNRNPUL2	TSPAN2	ARAP3	RXFP1	TSPYL5	NAA30	PCDHB15
LRRC47	CPEB4	ARAP3	SDHD	SUSD1	RAB5A	PRELID2	MIER1	ZNF681	CDR2	PPP2R2B	LIN7B	ZNF738	ANP32E	PCDH1	LRRCC1	PITPNB	SLC25A26	SLC25A2
APOLD1	USP32	ARAP3	HLA-DPA1	MICALL1	DPYSL2	SH3RF2	MID1IP1	RNF24	TSC22D1	PPP2R2B	B3GNT1	BTRC	FAM98A	PCDH1	MRPL32	E2F4	ZXDB	TAF7
PAFAH1B2	DNAJC5B	ARAP3	C12orf40	CDC40	TRPS1	PLAC8L1	CPEB3	DNAJC21	PKD1	PPP2R2B	LCA5	TGFBR1	TOPBP1	RNF14	SLC10A4	FNBP4	NFIX	TAF7
SCD	MARK1	ARAP3	TXNDC2	EDC3	MED12L	LARS	ACBD5	TSPAN14	UBE2W	PPP2R2B	OSTM1	MTUS1	RIF1	RNF14	HMGN4	RASD2	ONECUT2	PCDHGA1
RAB7L1	HEY1	PCDH1	TCFL5	PDLIM5	DYNLL2	LARS	FOSL1	HLF	CITED2	STK32A	WAPAL	ZFP91	PNPT1	RNF14	NVL	PDCD1LG2	METTL13	PCDHGA1
IL7R	ORC4	PCDH1	ST6GALNAC2	KCNK6	CLTC	LARS	ARHGAP12	TXNDC17	RANBP9	DPYSL3	PAIP2	CHD9	FAM104A	RNF14	IMMP2L	APC2	CNRIP1	PCDHGA1
PDE8B	MECOM	KIAA0141	CSRP3	CAMK2B	LDLRAD4	LARS	C9orf69	FAT2	PSIP1	DPYSL3	ZNF131	TP63	KIAA0368	RNF14	RPL36	JARID2	VAMP7	PCDHGA1
ZBTB34	ARL13B	KIAA0141	KAT2B	CORO6	SNX5	LARS	ST18	TMED8	ASF1A	JAKMIP2	NTF3	LL22NC03-63E9.3	MGAT3	RNF14	TMEM27	FAM163A	YES1	PCDHGA1
HPSE	ELOVL5	KIAA0141	VEPH1	NMT2	HIVEP2	LARS	CDK19	GFOD1	FAM8A1	JAKMIP2	CRTAP	XPR1	ARMC1	RNF14	C14orf132	SEMA3G	ST3GAL3	PCDHGA1
PRICKLE2	PGAP1	PCDH12	PLSCR4	DLG3	LNPEP	TCERG1	SPG20	DHX8	FBXW7	JAKMIP2	CDK17	RNF157	YBX3	NDFIP1	CAPS	GABARAPL3	IPO5	PCDHGA2
RHD	ITGAV	RNF14	RP11-295D22.1	C17orf51	MDFIC	TCERG1	UBC	CDK19	PTPRZ1	JAKMIP2	SNAP25	ZFP90	MARK1	FGF1	METTL5	AFF2	SLC6A1	PCDHGA2
TMED8	DPY30	RNF14	ITGAV	TUBD1	UBE2D2	GPR151	MEOX2	EMP1	NDN	SPINK5	BNC2	NCOA2	KCNS3	FGF1	GJA4	ECI1	AIFM3	PCDHGA2
DCTN5	THRSP	RNF14	COX7C	ANKRD62	EXOC5	PPP2R2B	TRERF1	CBL	FBXO33	SPINK5	SLC35F4	HABP2	HDX	FGF1	PTTG1IP	SNTB2	PPP1CB	PCDHGA3
C5AR1	NR1D2	RNF14	METAP2	N4BP2	S1PR1	PPP2R2B	COX8C	SLC5A5	SUZ12	SPINK5	ASF1A	DSTYK	PRPF40A	ARHGAP26	AP1S1	DNAJB1	SMG5	PCDHGA3
PIP4K2C	CACNA2D3	GNPDA1	BEND6	BMF	PHF3	PPP2R2B	SLC2A4RG	F3	SEMA6D	SPINK7	GIT2	SOX4	RBMX	ARHGAP26	GJE1	EDC3	ELOVL6	PCDHGA3
MYO1E	CLIP4	GNPDA1	BLZF1	CTSS	EPC2	PPP2R2B	FAM175B	HYOU1	NR3C1	FBXO38	CCDC82	TSC1	BRMS1L	ARHGAP26	GKN1	TSPAN31	KLF12	PCDHGA3
DSEL	ERMN	GNPDA1	OR51E2	SMU1	E2F7	STK32A	PTEN	RMND5A	YPEL2	FBXO38	TCAIM	ZNF746	GCLM	NR3C1	EP400NL	PPM1K	SIN3A	PCDHGA4
C9orf41	MAN1A1	NDFIP1	CDT1	TMEM41A	QKI	STK32A	KCNA4	DSEL	PUM2	FBXO38	NRG1	DNAJC16	MGA	SH3RF2	CKB	KIF7	STAT6	PCDHGA4
SUDS3	C1QBP	SPRY4	C1orf105	MAPK9	SKP1	STK32A	MTMR6	CHD9	ZFAND6	SH3TC2	ADIPOR2	ATP11C	KLF12	LARS	VAX2	BTN2A1	INSIG1	PCDHGA4
ARPP19	CAPRIN1	SPRY4	KCNQ3	C19orf40	ERBB4	STK32A	DSEL	MRAS	MAPRE1	ABLIM3	PPAPDC2	ODZ3	LIMA1	LARS	NOX3	SLC45A4	KRAS	PCDHGB2
UGGT1	TAF15	FGF1	RWDD4	DGKB	G3BP2	STK32A	SLC6A6	RHOBTB1	OSBPL11	ABLIM3	ADD3	PAX6	EPHA4	LARS	RP5-1052I5.2	ZFYVE1	H2AFY	PCDHGA5
TBC1D22B	SPTY2D1	FGF1	CST3	SLC8A3	MPPED2	STK32A	C5orf30	SLC31A1	DAG1	ABLIM3	ETS1	PRDM5	ANKIB1	GPR151	DLD	HLCS	SLC16A14	PCDHGA5
SMARCC1	CCDC82	FGF1	FAM211B	OTOS	MEMO1	STK32A	LONRF1	CHRM3	FNDC3B	ABLIM3	JHDM1D	CHST11	SLC38A1	STK32A	FABP7	SOX15	CORO2B	PCDHGA5
SORT1	TBL1XR1	FGF1	NXT2	APOLD1	KIAA1468	STK32A	SNAP25	SLC25A42	JUN	ABLIM3	FLII	UGGT1	PPP6C	DPYSL3	C17orf100	MYO5B	MNT	PCDHGB3
SCUBE3	PRPF38B	FGF1	SWI5	DDX19A	RAPGEF4	STK32A	PHF20	MPZL1	SNAP25	AFAP1L1	SLIT2	KCNK2	CNOT8	DPYSL3	ARMC1	PDK2	WLS	PCDHGB3
C1orf95	CTSK	FGF1	PNRC2	ZNF354C	SMOC1	DPYSL3	CPEB2	NEDD9	NPTX1	AFAP1L1	DUSP1	CRISPLD1	NEMP1	DPYSL3	CASP1	GALNT4	GET4	PCDHGA6
PDIA4	CALM1	FGF1	STATH	HEATR3	MYT1	DPYSL3	KLF3	MTR	ZNF292	AFAP1L1	CLIC4	FCRL5	MSANTD4	SPINK5	KLHDC1	DICER1	NEFM	PCDHGA6
SNX30	PAIP2	FGF1	DPY30	SDK2	MB21D2	JAKMIP2	HIVEP2	BTC	PDIK1L	AFAP1L1	TRAPPC8	MYO5B	ESYT2	SPINK14	TRABD	ATXN10	AKAP2	PCDHGA6
LAMTOR3	RALGAPB	FGF1	TBPL1	AL357673.1	UBE2W	JAKMIP2	ATP2B2	ANKRD12	INTS8	AFAP1L1	FAM118B	USP14	ADAM10	SPINK9	GIMAP7	WWC2	GDE1	PCDHGA7
ERC2	MDM4	FGF1	CCNC	ZZEF1	PTPRG	JAKMIP2	QKI	ZFP90	CAMSAP2	AFAP1L1	TMEM17	NOTCH1	LPGAT1	FBXO38	DBI	PAX6	CELF1	PCDHGA7
UHMK1	ZNF665	FGF1	NEK2	ATG4B	CALM2	JAKMIP2	EPC2	USP14	CEP41	GRPEL2	SCOC	SMU1	JAM3	FBXO38	GK2	TSPAN14	TSTD2	PCDHGA7
XPR1	SLC30A5	FGF1	HOXC9	PRKAR2A	CBFB	JAKMIP2	STK33	KIAA1024	HNRNPD	GRPEL2	CACUL1	PAFAH1B2	NOL4	ADRB2	GEMIN2	YWHAG	PPTC7	PCDHGA8
CLIC2	STRAP	FGF1	TMEM92	TEP1	INHBB	SPINK5	SMARCD2	EFR3A	RTF1	PCYOX1L	JUN	PARP14	POU4F1	SH3TC2	CCDC25	TNPO1	SIN3B	PCDHGA8
CTTNBP2NL	KAT2B	FGF1	TECTB	GLT25D2	BPTF	SPINK5	RBM25	NHLH1	TRIM33	ARHGEF37	BAG6	LUZP1	PCDH17	ABLIM3	PECR	POU6F1	SEC24B	PCDHGB5
DESI1	LRP11	FGF1	DKFZP434O1614	CRKL	SMAD5	SPINK6	POU6F1	HSPA5	NTF3	PPARGC1B	C16orf72	USP51	CBLN1	ABLIM3	C6orf164	MXD1	SEH1L	PCDHGB5
VASH2	RAP1B	FGF1	AGL	GATC	PIGA	SPINK9	DYNC1LI2	IL20RA	OTUD4	PPARGC1B	RAB21	C14orf101	SP1	ABLIM3	BCL2L14	C16orf72	ZFAND3	PCDHGA9
CLDN1	MYBL1	FGF1	TP53AIP1	SORT1	B4GALT5	SPINK9	RAB30	EPM2A	E2F3	PPARGC1B	KIAA0087	ABL2	CCSER1	ABLIM3	CA5A	SS18L1	KPNA1	PCDHGA9
SPCS2	PLS3	FGF1	IL12A	HERPUD2	ITPK1	HTR4	CCNY	RSBN1L	LMO7	PPARGC1B	SGCE	GPR61	PTEN	AFAP1L1	FAM227B	ANKRD24	RECK	PCDHGA9
PBX2	HNRNPA2B1	FGF1	CACNG3	IRAK4	PGM2L1	HTR4	FMR1	APOLD1	CELF2	PPARGC1B	HS3ST3A1	C1QTNF7	NLGN1	AFAP1L1	LTA4H	PPM1H	ENOX2	PCDHGA9
FAM199X	CREBRF	FGF1	LHFP	SLAMF1	BHLHE41	HTR4	MTMR10	KCNG3	SLC1A2	SLC26A2	GJC1	HSPA5	NYAP2	AFAP1L1	SPINT3	LRRC16A	MXD4	PCDHGB6
FAM71F2	SLC4A10	ARHGAP26	FAM83C	IL22RA1	NPTX1	HTR4	PAPD4	PDLIM5	CDYL	TIGD6	SLK	DPT	TBX3	AFAP1L1	DRG2	CRKL	RCAN2	PCDHGA10
NCOA2	LIFR	ARHGAP26	PTGR2	MFAP5	CPEB4	HTR4	WDR47	FNDC3B	PHTF2	TIGD6	SULF1	CALCB	GABRB3	AFAP1L1	GFOD1	KCNA3	ALDH5A1	PCDHGA10
PAX6	DICER1	NR3C1	SDHB	GPR82	TAF4	HTR4	GAREM	MANEA	ANK3	CAMK2A	SNAPC1	GPR135	GPC4	AFAP1L1	AAK1	OLIG3	MEF2A	PCDHGA10
NOTCH2	SS18L1	NR3C1	HUS1	DSC1	SASH1	HTR4	JARID2	PAFAH1B2	ETS1	CAMK2A	KIAA1432	SLC25A26	HSPE1	AFAP1L1	GABRP	ATP8A2	ABCB9	PCDHGA10
POU6F1	PRR14L	NR3C1	SH2D1A	THRB	SMOC2	HTR4	IMPDH1	MYO5B	PRKACB	ARSI	TFAP2A	MYOCD	LGI2	AFAP1L1	ENO4	KIAA0930	NCAM1	PCDHGA10
GPR107	SLC16A7	NR3C1	CYB5R4	COL1A1	PTPRM	HTR4	MXD1	PLD1	SESN1	TCOF1	RANBP9	EVC	EBF1	GRPEL2	ACN9	IGLON5	RRP1B	PCDHGA10
ZFYVE19	TSHZ3	NR3C1	LAMTOR3	ARPP19	AGFG1	HTR4	C16orf70	CREB3L2	GDI2	TCOF1	CDH20	SLC25A40	RBM4B	GRPEL2	GPX8	SDK2	ZNF451	PCDHGB7
GPI	TRIM2	NR3C1	TTL	CCBE1	LONRF1	HTR4	EPS15	GPR82	C16orf72	TCOF1	CTD-2510F5.6	SIM2	KITLG	PCYOX1L	PRUNE2	LRRC8A	MYH11	PCDHGB7
STK35	ARHGAP44	NR3C1	WDR45B	CREBBP	ABCA1	HTR4	ATG16L1	HLTF	SYDE1	TCOF1	RIMKLB	PTPN11	MAP9	CSNK1A1	AZI2	TMPRSS11E	CHST1	PCDHGB7
PLEKHG1	B4GALT6	HMHB1	NUDT16	ETV3	HECA	ADRB2	WNT2B	MCL1	COPS8	TCOF1	TBC1D12	DEPDC1	PCDHAC1	CSNK1A1	IL9	MYOCD	ATP11A	PCDHGB7
TMEM42	TCTEX1D1	KCTD16	ERMN	LGI4	PMEPA1	SH3TC2	PHF14	RNF152	SYT1	TCOF1	GATSL2	KIAA0141	B4GALT6	CSNK1A1	RIPPLY2	SYK	TNRC6B	PCDHGA11
GGA2	TCFL5	LARS	ZNF669	SOX11	ATG16L1	SH3TC2	KBTBD8	TMF1	FMR1	TCOF1	BDP1	ZFYVE1	MYT1L	CSNK1A1	IL8	ELOVL6	NSD3	PCDHGA11
RNF11	ABCA5	LARS	C19orf82	RHOT2	NRP1	ABLIM3	NABP1	NARG2	HMBOX1	TCOF1	GPR27	TRPM8	CPED1	ARHGEF37	GLO1	WDR6	MTMR9	PCDHGA11
LEPROT	PRKCA	RBM27	SHISA5	PBLD	GAP43	ABLIM3	SLC44A1	FAM46C	NPC1	SYNPO	STRN	DNAJC21	SLC4A7	ARHGEF37	OIT3	GPR17	PPP1R2	PCDHGA11
DTNA	CCND2	RBM27	CACNA2D3	ZBTB34	CAMTA1	AFAP1L1	NPTX1	TCF12	ELL2	SYNPO	WASF3	E2F3	ASH1L	PPARGC1B	KCNS3	CLEC2L	GCNT1	PCDHGA12
SCN8A	KBTBD6	RBM27	IFNA6	SRGAP3	AGO1	AFAP1L1	TMEM159	SYT6	FERMT2	SYNPO	FUBP1	PDS5A	RASSF2	HMGXB3	CBLN1	NTNG2	TNPO3	PCDHGC3
XXbac-BPG32J3.22	CPEB3	TCERG1	ZNF141	FLG2	JARID2	GRPEL2	STIM2	TMCC3	BASP1	SYNPO	IER5	AMOTL2	DCLK1	CSF1R	DUSP1	ACVR1B	SEMA5B	PCDHGC3
AC002511.4	PPM1B	TCERG1	NIPA1	KIAA2018	TSC1	GRPEL2	RTN1	LEPROT	TBK1	SYNPO	EFNA1	ANKRD13A	GPR158	CSF1R	STAU1	PPP1R3B	MFSD4A	PCDHGC3
NARG2	TRHDE	TCERG1	VGLL4	KIAA1024	MAT2B	CSNK1A1	ZBTB4	CYLD	GIT2	SYNPO	SLC6A1	PIAS2	FGF2	CDX1	TMEM14E	IQSEC1	PANX3	PCDHGC4
SEMA4D	LECT2	TCERG1	CLIP4	DMBX1	RUNX3	ARHGEF37	SLC25A32	KIAA0141	REEP1	RBM22	KLHL14	FOXJ2	PARVA	SLC6A7	ABHD3	CAMK2B	EPHB2	PCDHGC4
AP000350.4	PTN	STK32A	WDR11	RBM33	GJA1	PPARGC1B	FBXO48	CD2AP	ELF2	ZNF300	LPPR1	APOLD1	KIAA0232	SLC6A7	DDT	CLDN1	SLC1A2	PCDHGC4
LIN7A	STAU2	STK32A	NDFIP2	FZD4	BACH2	PPARGC1B	STX6	BACE1	MIEF1	GPX3	DNAJB9	ENDOD1	EPHA7	CAMK2A	PYURF	TREML2	DHX58	PCDHGC5
GAS2L1	GCM2	STK32A	ADAM2	NOTCH2	MAML1	PPARGC1B	CENPO	ZNF189	TSC22D2	GPX3	ZBTB7C	ZMYM4	MKL2	CAMK2A	LDB3	PRLR	PITHD1	PCDHGC5
CDR2L	APC	STK32A	SLC38A1	ICAM1	BAHD1	PPARGC1B	NPEPL1	RNF11	CSMD3	TNIP1	PPM1F	SNX30	BCL11B	TCOF1	AC117834.1	DOT1L	GRIK2	PCDHGC5
TMCC3	SUCLA2	DPYSL3	ELOVL5	ZNF674	CDK19	PPARGC1B	G3BP2	AMOTL1	MAP2	TNIP1	UBE2V1	BTN2A1	PALM2	TCOF1	GCM2	SAMD4A	TLX1	DIAPH1
RINL	ZFC3H1	DPYSL3	C4orf40	CD68	CYLD	PPARGC1B	LRP8	FOXP2	EGR3	TNIP1	FBXO30	PGAP1	SH3GL3	TCOF1	DEPDC1B	TMEM105	LRRC8A	DIAPH1
AP4S1	RALA	DPYSL3	RAP1B	FCHSD1	WDFY3	PPARGC1B	LCOR	ANKRD17	RIC1	CCDC69	MMD2	JARID2	EIF2AK3	CD74	DUS4L	SSX4	PPP1R9A	DIAPH1
CGN	ZNF780A	SPINK5	PTBP2	LRRC27	ADAM12	CSF1R	DGKE	MAGT1	PAIP2	SLC36A1	SRSF10	GLI3	ENAH	CD74	RP11-65D24.2	SDHAF2	CEND1	DIAPH1
IBA57	RBFOX1	SPINK5	SCN3A	YARS2	BTBD3	PDGFRB	HOXA3	CORO6	BNC2	SLC36A1	AGFG1	SORT1	ARHGAP15	CD74	TFRC	NFAT5	IP6K3	DIAPH1
CCDC48	DLAT	HTR4	EIF5A2	ELMOD1	FSTL5	SLC6A7	GADD45A	C17orf78	HS3ST1	SLC36A1	PPP2CA	SYT6	DLD	SYNPO	UBXN2B	PRPF38B	TRIOBP	DIAPH1
DGCR2	GFM2	HTR4	NME1	C1RL	TNRC6A	CD74	BHLHE41	NCOR1	SMURF2	SLC36A1	JKAMP	CXCL3	AZIN1	SYNPO	TAL2	SIN3B	MGRN1	DIAPH1
THRB	C16orf72	HTR4	ZNF385D	TRPM8	SOX4	CD74	PCNX	SUDS3	RAB11FIP2	FAT2	IAH1	AL355390.1	LHX8	SYNPO	RGS18	DEAF1	ADARB1	DIAPH1
PGPEP1	SMC2	ADRB2	CNTD1	SREK1	CLOCK	CD74	ARHGAP24	AEN	DLC1	NMUR2	GAL3ST1	FAM172A	PURA	SYNPO	CSGALNACT2	FGD4	FOXN3	DIAPH1
CNTN2	PTGES3	SH3TC2	ATPAF1	ERC2	TARDBP	CD74	NRBF2	AC114772.1	NFIA	GRIA1	FUBP3	FRMD4A	ERMP1	SYNPO	DKK1	CNRIP1	DYRK2	HDAC3
SREBF2	SERBP1	AFAP1L1	HYPK	ABCB5	ZEB2	NDST1	SOS2	PTPLB	ZC3H6	GRIA1	ARL5A	NECAP1	PAPD5	SYNPO	HAND1	CCKBR	KMT2B	RELL2
ZKSCAN2	SLC38A1	AFAP1L1	DOK6	WISP3	SPEN	NDST1	GDA	FAM19A1	OXR1	GRIA1	FOXF1	DDX19A	RAPGEF2	MYOZ3	GNGT1	KCMF1	FBXO31	RELL2
DGKB	RREB1	AFAP1L1	SEPT14	CARD14	LDLR	SYNPO	OTUD3	ABL2	SLC6A1	GRIA1	ANP32B	UHMK1	SEMA3A	RBM22	TRIM69	EFNA3	POU2F1	RELL2
SELL	BBC3	AFAP1L1	MAGEB5	SLC26A2	MFSD6	RBM22	SMOC1	GPAM	SPTSSA	FAM114A2	EGLN1	DZIP3	MECOM	SMIM3	C2orf88	DHX58	ZNF626	FCHSD1
APC2	NIPA1	GRPEL2	KLC1	ZNF91	SNAP25	ZNF300	ACPL2	ATG4B	ZNF217	FAM114A2	TWISTNB	PARM1	ZBED4	TNIP1	NUP54	SLC8A3	TYW5	FCHSD1
RGMB	APP	GRPEL2	PCSK1N	PTPN11	MTF1	ZNF300	UBE2W	RRAGD	RHOA	FAM114A2	C2ORF15	VPS13D	PCGF5	TNIP1	CDRT15L2	RCAN2	CDIP1	FCHSD1
F2RL1	PRKAA2	PCYOX1L	LAPTM5	MRTO4	PEX5L	ZNF300	CCT6A	GDI2	ZCCHC24	FAM114A2	CEBPD	PSMF1	RAB8B	TNIP1	TRIML1	CNKSR2	CHRM3	FCHSD1
ZFP90	RUNDC3B	CSNK1A1	ANKDD1B	CISD3	EPS15	ZNF300	APCDD1	ERP44	PHF6	SAP30L	HSPA13	CYBRD1	DNAJB14	TNIP1	TTC33	PSAP	TBL1X	FCHSD1
IL22RA1	AP1G1	CSNK1A1	PVRL3	NEK8	ROBO2	ZNF300	SOCS5	PBLD	HS2ST1	SAP30L	PCMTD1	COG8	MAPK9	TNIP1	PSIP1	NCOR1	RAPGEF2	FCHSD1
COL19A1	PRPF4B	CSNK1A1	TMEM41A	CRTAM	EFNB2	ZNF300	RP11-676J12.7	SENP1	GOLGA7	SAP30L	PPFIA1	PCDH19	ARPP19	TNIP1	RHEBL1	SLC25A26	RHOQ	ARAP3
PLA2R1	TENM3	CSNK1A1	SULT1C4	TMCC3	MET	TNIP1	CDS1	CAMK2B	PLPP3	SAP30L	GUCY1A3	ERP44	NUMB	TNIP1	SLC25A18	E2F3	RAB26	ARAP3
SLC25A25	PTGR2	ARHGEF37	SHCBP1L	NUP62	IRF1	GM2A	PTP4A1	SP4	SRSF1	SAP30L	DNMT3B	DTHD1	CREB1	TNIP1	RP11-849H4.2	METTL13	MAPK1	ARAP3
HIP1	SOS2	ARHGEF37	SKIV2L	PTPLB	ITPR1	SLC36A3	NEUROG1	AXL	MAP4K4	SAP30L	PIGM	METTL13	LUZP2	TNIP1	CLVS1	MARVELD3	DICER1	ARAP3
MS4A10	SMIM14	PPARGC1B	SOCS4	STRA13	TBL1XR1	SLC36A3	IER3IP1	ZSWIM7	EIF2S1	FAXDC2	GNAQ	IL7R	ELK3	TNIP1	ADAM7	INO80D	SORBS2	ARAP3
CDC73	PTAR1	PPARGC1B	ACN9	C5AR1	ARHGAP1	FAT2	UBXN2B	RPRD1A	TOGARAM1	CNOT8	MYB	ALAD	CDS1	CCDC69	SMKR1	LMX1B	CASC10	PCDH1
C17orf51	KDM4C	PPARGC1B	CYP2E1	MEGF9	TRIM2	FAT2	SNX5	NFYB	ANLN	CNOT8	CKAP4	SMAD9	YAF2	SLC36A1	ATP5E	KIAA0141	CASC4	PCDH1
MDFIC	PACSIN1	PPARGC1B	NODAL	DNAJB2	CNIH1	FAT2	SOGA2	TP63	EP300	CNOT8	RNF2	ZNF674	GPR180	SLC36A1	YIPF1	CHRM3	FUT8	PCDH1
SWAP70	REV1	PPARGC1B	IFI44	HTT	CUL3	SPARC	ENPP6	MBNL1	ARIH2	CNOT8	UBE2I	PGM5	ZNF772	SLC36A1	PAGR1	ATP11A	TNPO1	KIAA0141
ATP11C	NLGN1	PPARGC1B	FP15737	LPAR3	KIT	NMUR2	TMEM110	DICER1	EFNB2	CNOT8	ARHGAP6	GJD2	PRKAA1	SLC36A1	PMCH	PITX1	ANTXR1	KIAA0141
ZNF705D	ASCC3	PPARGC1B	CYB5R2	GPR114	CCDC126	GRIA1	MET	SNX11	KDM7A	CNOT8	RHOA	DPY19L3	TMEM170B	SLC36A1	SLMO2	TRAF3	DCAF5	KIAA0141
EML4	TOGARAM1	PDE6A	BSPH1	WDTC1	USP6	GRIA1	TRPC3	ABHD13	PRKAR2B	CNOT8	NANOS1	AC012123.1	PAFAH1B1	SLC36A1	METTL18	TANC2	ZNF148	KIAA0141
SREK1IP1	PIGF	PDE6A	TNFAIP6	RHBDL2	ABRAXAS2	GRIA1	TMEM170B	CD247	ARID4B	CNOT8	CTDSPL2	CD302	DIAPH2	SLC36A1	RRM1	SMPD3	CSF1	KIAA0141
PHLDA1	TENM1	SLC26A2	DMP1	NARG2	SRSF11	GRIA1	PXK	SUPT3H	CASR	CNOT8	MFAP5	RP5-877J2.1	SUB1	FAT2	HMGN2	DLGAP2	ZNF827	KIAA0141
TSPAN31	PLSCR4	TIGD6	NOXRED1	SYT2	TOGARAM1	GRIA1	FIBIN	ZNF268	VASH2	CNOT8	PPAP2B	ZBTB6	FOXP1	GLRA1	SBSPON	MAFK	GPR39	KIAA0141
KLF9	ARHGEF3	TIGD6	CD302	FAM84A	CPEB1	GRIA1	FAM107B	KCNK1	XIAP	CNOT8	BAG5	O3FAR1	ADGRL2	GLRA1	PSMB3	CEBPA	LURAP1L	PCDH12
CHIC1	RWDD4	TIGD6	SMC2	PIP4K2C	MYBL1	GRIA1	SECISBP2L	MAP2K6	CSNK1G3	CNOT8	RAB37	LIPH	ENTPD1	GLRA1	ATP5L	STK10	FOXP1	GNPDA1
SLC7A14	RERGL	HMGXB3	CCDC89	FBXO6	PPARG	GRIA1	RBBP8	ENDOD1	DDX3X	CNOT8	PIN1	RCAN2	TMEM144	GLRA1	EN2	CASKIN1	CD59	GNPDA1
MRM1	TTL	HMGXB3	HTR7	MTMR2	EREG	GRIA1	SNX2	ZFAND5	EVI5	CNOT8	CHST9	SPTLC3	SEMA3C	GRIA1	HSP90AB1	RAB35	USH2A	NDFIP1
ARHGEF18	NXT2	HMGXB3	TRIM29	FAM207A	STC1	GRIA1	MBNL1	RNF111	FXR2	CNOT8	KDR	TMEM41A	SESTD1	FAM114A2	AC129492.6	SLC35E2B	WDFY2	SPRY4
SYT11	SLC25A24	CSF1R	VMP1	L1TD1	BMT2	GRIA1	FAM73A	TBC1D22B	WASF3	CNOT8	FXR2	CTNNBIP1	TMEM54	FAM114A2	LIN9	AK1	XPO7	FGF1
SOX15	MMD	PDGFRB	SERPINB1	CCDC92	MAP3K9	GRIA1	HADHA	MBL2	PAPD5	CNOT8	NEDD1	ERVMER34-1	PANK3	FAM114A2	RAB3IP	PLCXD1	KCNA3	FGF1
AC012123.1	GNG2	SLC6A7	GVQW1	RELL1	DSEL	MFAP3	MTMR9	IL6ST	LAMC1	CNOT8	HS3ST1	LRRC55	USP6	FAM114A2	LEPROT	ASCL4	TFAP2A	FGF1
LYPLAL1	SMTN	TCOF1	BAAT	C6orf228	SOCS6	MFAP3	RFX7	ELOVL7	RHOT1	CNOT8	SPTSSA	TNRC6C	NFIA	MFAP3	ODC1	ZDHHC14	SLC38A1	FGF1
AC114772.1	KCNMB2	TCOF1	BCKDHB	PDPR	INO80	GALNT10	LRIG1	COX7B	ZDHHC17	CNOT8	KLF10	SCARB2	HTR2C	MFAP3	RNFT1	AL020996.1	FKBP1B	FGF1
AC078953.1	KALRN	TCOF1	QKI	KIAA0141	BTG1	SAP30L	MLLT6	DSG3	FUBP3	CNOT8	MIEF1	OPALIN	ZDHHC21	MFAP3	ANKRD30B	MYO5A	NFIB	FGF1
UBE2D4	ZC3H7A	TCOF1	UBD	TSNARE1	NEUROD1	SAP30L	PDE7B	DZIP3	PHACTR3	MRPL22	FXR1	RNF169	GID4	MFAP3	PIH1D1	CA12	MEF2D	FGF1
CTD-2368P22.1	NEGR1	TCOF1	FAM210B	AC099489.1	PPARGC1A	SAP30L	RAB12	WDR76	CORO1C	MRPL22	COPS8	SCD	ITSN2	MFAP3	CCL13	ADARB1	KLF6	FGF1
EDEM3	QKI	TCOF1	ZNF665	HSPA5	JADE1	SAP30L	APPL1	GALNT4	RDH10	SGCD	EIF2S1	PGRMC2	NCBP1	LARP1	KISS1R	DTNB	ZNF526	FGF1
C1QTNF7	HNRNPA0	TCOF1	RAB27A	F2RL1	MDGA2	SAP30L	ZFPM2	FUT10	SEMA3F	SGCD	RDH10	C7orf60	KIAA1549	GEMIN5	ITM2A	AC110619.2	TFRC	FGF1
ZNF417	OR51E2	TCOF1	PABPC1	C3orf62	SOS2	SAP30L	STX12	USP51	CEP350	SGCD	ITM2B	SLC26A2	ST8SIA4	CYFIP2	NUDT15	MYO1C	NR3C2	FGF1
CCBE1	LRRC7	TCOF1	PIP4K2A	UHMK1	POU3F2	SAP30L	SYT6	FAM134C	NRBP1	HAVCR1	FBXW7	FUT10	NUFIP1	CYFIP2	SNX14	TNRC6B	GEMIN8	FGF1
MPZL1	MKX	TCOF1	PTGES3	LRRC61	NPEPL1	SAP30L	RUNX3	RNF157	PCMTD1	HAVCR1	PALM2	C1orf229	PSMA5	NIPAL4	RPL7A	HES5	BCL11A	FGF1
GPNMB	PTGER3	TCOF1	PRKG1	EFNB1	PDGFRA	SAP30L	CMPK1	MYCBP	CDH11	HAVCR1	RND3	NALCN	GCC2	NIPAL4	C11orf71	WASF3	FLNC	FGF1
CYBRD1	ZNF33A	TCOF1	TSPYL1	OCIAD2	APPL1	HAND1	PVRL3	RIN2	EFNA1	HAVCR2	REV1	YWHAH	ZNF24	THG1L	RASGRP1	ABLIM2	KCNH5	FGF1
C14orf119	NUCKS1	TCOF1	LL22NC03-75H12.2	SMAD9	ZNF800	LARP1	SKP1	APC2	FHL1	HAVCR2	TOB1	RHBDL2	NRCAM	CLINT1	PCGF1	EXOC8	NFAT5	FGF1
DEPDC1	RPRD2	TCOF1	FAM47E-STBD1	DBT	EMX2	LARP1	ACSL1	TTBK1	TNFRSF11B	FAM71B	FBXO33	TM6SF1	TTC33	CLINT1	USP16	PARP10	PTPRK	FGF1
CD274	ZNF410	TCOF1	NEUROD6	LMX1B	KMT5B	CNOT8	SULF1	MRPS16	DNAJB5	CYFIP2	HDHD2	TMEM105	TNRC6B	CLINT1	CD1B	P2RY8	NFIC	FGF1
NEDD9	KRIT1	TCOF1	FAM104B	RAB3C	NAA50	CNOT8	RPA2	PLEKHG1	PIKFYVE	ADAM19	SMG8	HLF	WWC3	EBF1	GOLGA8G	DAZAP1	YAF2	FGF1
ZMIZ1	KITLG	TCOF1	TXNDC16	USB1	SPOPL	CNOT8	PRKACB	OLIG3	RAPGEF2	ADAM19	THAP1	MKI67	NUP50	EBF1	CPPED1	C17orf50	SAMD12	FGF1
REG3G	KIAA1109	TCOF1	SLC19A2	UGGT1	NR3C2	CNOT8	DPYSL2	RAB14	SCD	LSM11	SLC30A5	ZNF502	PAX9	EBF1	DYNLL1	KIAA1614	SMIM12	FGF1
COX7A2L	TCF4	TCOF1	KIAA0895	TMEM9	ACSL1	CNOT8	FAM19A1	BBS2	PCSK2	EBF1	HNRNPD	ATG16L1	CDC37L1	EBF1	TBC1D3B	BEND4	TMEM40	FGF1
DNAH5	CA5B	TCOF1	RP11-1085N6.3	TREML4	RAB30	CNOT8	MYB	RYBP	HLF	EBF1	MXD3	BCL10	TMEM30A	UBLCP1	CCR3	USF1	ADAMTS5	FGF1
MDM4	SKA2	CD74	TMEM196	SNX12	TMEM9B	CNOT8	RAB9B	ZNF548	ADIPOR2	EBF1	ABI2	EMC1	CHML	ADRA1B	SMIM6	TUSC5	PRPF38B	ARHGAP26
FLVCR1	TMEM200A	CD74	C17orf47	GABRB2	KMT2A	CNOT8	WASL	KCNA4	SCAMP1	EBF1	ZDHHC17	B4GALT6	2020-09-09	PWWP2A	RYR3	PICK1	SEL1L	ARHGAP26
PCDHGC5	HBP1	CD74	CUL2	KRI1	WEE1	GEMIN5	PTPRG	SCARB2	VLDLR	RNF145	CXorf23	DYNLL2	MFAP3	PWWP2A	EYS	HIVEP3	MEX3B	ARHGAP26
PCDHGA5	FAM26D	CD74	MFSD9	TRAM2	OSBPL11	KIF4B	ADAM12	MLANA	CALU	RNF145	ELL2	SLAMF1	CAPRIN1	PWWP2A	HIST1H2BH	TTC38	MRM2	NR3C1
GRPEL2	LRRC4	NDST1	TMEM215	MTRNR2L4	DYNC1LI2	SGCD	MYT1L	PLAGL1	CLIP1	RNF145	PUM2	SPECC1L	SUZ12	FABP6	RP11-861L17.3	FAM222A	CLDN1	NR3C1
ZNF395	FMO3	NDST1	LRRC70	INO80D	ASXL2	SGCD	BAHD1	DBF4	MTF2	RNF145	UBE2W	MOB4	MYCBP2	FABP6	RP11-706O15.1	HES7	C11orf58	NR3C1
NPR3	PKIB	DCTN4	FOXA1	ZNF746	MLLT6	SGCD	ARHGEF4	ARHGAP42	TMCC1	RNF145	CASC4	GCDH	HNRNPA3	CCNJL	B9D1	MINOS1	MDGA1	NR3C1
RAB14	FSD1L	DCTN4	ARL13B	MOGAT3	PAFAH1B1	TIMD4	CLCN6	UGGT1	KCND2	RNF145	FSCN1	ZBTB34	TNKS	CCNJL	SMIM10	PIGN	NOX4	NR3C1
ZFP91	INO80D	DCTN4	CREBZF	ACTL7A	RNF145	TIMD4	NPAT	CPEB3	WDFY3	RNF145	CERS6	ZNF681	RTN4	CCNJL	CLEC1A	GABPB2	TKFC	HMHB1
VPS13D	MBNL1	SMIM3	VEGFC	ANKRD13A	LCORL	HAVCR1	THOP1	TYRP1	FOXF1	RNF145	NFIB	USP24	BEND4	CCNJL	BCL2L13	UBFD1	CALCOCO1	YIPF5
GEN1	RFX7	IRGM	TACR2	XPR1	HOXA5	HAVCR1	CHIC1	NPTX2	HIPK1	RNF145	NDN	BTBD1	WASF1	CCNJL	MDH1B	CYP2S1	HOXA1	YIPF5
ARHGAP40	STXBP5L	ZNF300	RBM27	MYO10	FAM155B	HAVCR1	FZD6	EMC1	POLK	RNF145	ARGLU1	DCDC2	CPEB3	CCNJL	MKNK1	P2RX6	LDLRAD4	YIPF5
THBD	CNIH1	ZNF300	LRGUK	TMEM105	POU4F1	HAVCR1	SLC35D1	TMEM99	GJC1	ADRA1B	SNX30	ZNF189	RASSF6	ATP10B	MT1X	SHE	PALM2-AKAP2	YIPF5
POT1	ZNF532	ZNF300	POU4F2	GNAQ	NPAT	HAVCR1	HECW2	MKI67	DYRK2	PWWP2A	GNPDA1	NCKAP5	SOX11	ATP10B	MSANTD4	EHMT1	FOXD2	KCTD16
CRISPLD1	FLRT2	GPX3	OR4C13	ANKRD24	ADCY2	MED7	RASGEF1A	TRAM1	CTDSPL2	C1QTNF2	PPP1R18	ANKRD46	TMED10	ATP10B	C11orf31	DDAH1	ANKS3	GRXCR2
IRAK4	FGB	ANXA6	HLA-DQB1	GJD2	RBM25	FAM71B	AGFG1	STK35	DOCK4	PTTG1	MAPRE1	FAM110C	MMP16	ATP10B	TOPBP1	SIGMAR1	SLC8A3	SH3RF2
ZNF502	BICD1	ANXA6	SLC7A2	ZNF548	PSD	CYFIP2	EMX2	ZNF770	LBR	PTTG1	CNTFR	TBX5	ARID3B	ATP10B	PLA2G6	PPFIA1	PIK3R5	SH3RF2
PRDM5	TRAF3	ANXA6	CCAR1	STARD9	RFX7	CYFIP2	INHBA	FGD4	PPP6R3	PTTG1	BTF3L4	DMRTC2	MPP7	GABRA1	CRYM	AL139099.1	DRD5	SH3RF2
ALDH8A1	TANK	SLC36A3	RBFOX1	COG8	NHS	CYFIP2	SLC8A1	C1QTNF7	DACT1	GABRB2	FLJ20373	AEN	YOD1	NINJ2	RIF1	TBC1D24	PDE10A	SH3RF2
VSX2	STAG2	SLC36A3	ZNF175	REXO1L1	FRMD6	CYFIP2	FRMD6	ABCB5	RAB21	B4GALNT3	CDKN1B	KIAA0895	PCDH9	WNK1	MRPS33	HGSNAT	INPP5A	SH3RF2
DLG3	TSC22D2	SLC36A2	ADAMTS19	XXbac-BPG32J3.22	ARID4B	CYFIP2	BACH2	GPNMB	SLITRK1	WNK1	PSPH	ZNF436	PHF24	WNK1	COX5A	PFN2	ANO4	SH3RF2
NFX1	LRP8	SLC36A2	PRPF4B	DHX8	SOCS5	CYFIP2	LMLN	ZNF500	ESRRG	WNK1	WDR91	TREML4	ST18	WNK1	RRH	ZBTB43	STK24	PLAC8L1
SSX4	MPP4	SLC36A2	ASPA	PLA2R1	TMEM110	CYFIP2	POU4F1	NID1	EGLN1	WNK1	HSPA9	NFYB	RAB1A	WNK1	RER1	PPP1R3E	RAB3B	PLAC8L1
PPL	PHTF2	SLC36A2	NUP107	TGFBR1	ZBTB4	CYFIP2	CNR1	NSUN7	PLS3	WNK1	ZCCHC24	UTY	SYT4	WNK1	BZW2	NAT14	SSX1	PLAC8L1
ELOVL7	AKAP10	SLC36A1	B4GALT6	FGFBP3	NME7	NIPAL4	CDADC1	ARHGAP29	PLK2	WNK1	BAP1	CYLD	RNF145	WNK1	FBXO3	CEBPB	MAP7D1	LARS
TMEM86B	ARL5A	FAT2	TESPA1	CAMK1D	CD69	NIPAL4	ARHGAP1	IBA57	RASSF8	WNK1	CLASP1	MFAP3L	TTC30A	WNK1	PALM2	SLC35B4	CSNK1E	LARS
C12orf55	MTMR2	GRIA1	CALCB	C16orf72	USP32	ADAM19	TNF	LRRC27	APOO	ERC1	DGKA	ZNF80	PDK4	WNK1	RP11-826N14.2	C11orf87	SS18L1	RBM27
SSX3	MAGEA2	GRIA1	NUDT4	ZKSCAN2	RBBP8	THG1L	DEDD	POLR3G	MCFD2	ERC1	NFIA	CBL	DACH1	ERC1	RP11-1026M7.2	AC005481.5	SUCO	RBM27
SEL1L3	CARD8	GRIA1	C7orf13	GTPBP4	MAF	THG1L	BMPR2	SSX4	GAB1	ERC1	SIX1	ANKRD34C	MEGF10	ERC1	TRMT13	NIPA1	RPL22	RBM27
CLUAP1	SLC6A15	GRIA1	WASF3	VCPIP1	WNT1	LSM11	CYB5R4	GBAS	CECR2	ERC1	SIX3	SYT9	ICK	ERC1	AC137056.1	MTMR10	POU2F2	POU4F3
RGPD2	DCUN1D1	GRIA1	FMO3	ZFAND5	PTP4A1	LSM11	FSTL5	LAMTOR3	GTF2E1	ERC1	NLGN4X	GNG7	ADCY1	ERC1	GC	SLC25A27	TP53TG3	TCERG1
FAM22D	ABCB10	GRIA1	SF3B3	ZNF724P	CSMD1	CLINT1	SPHK2	SPATA18	SMAD2	ERC1	TSC22D1	SPP1	CNIH1	ERC1	IMPA1	VKORC1	ANK1	TCERG1
ADPRH	BAAT	GRIA1	C14orf178	PLSCR3	GAREM1	CLINT1	NPTN	TMEM50A	PCDH8	ERC1	DCBLD2	EML4	GRIA3	ERC1	C17orf53	HOXB9	SRSF11	GPR151
CPEB3	CNTN1	GRIA1	TMEM30A	RPUSD4	NCOA1	CLINT1	BTF3L4	RBMS1	WDR82	ADIPOR2	ARL2BP	ZFAND5	PCDHA6	ERC1	KRTAP13-1	SHISA2	CREBZF	PPP2R2B
BTN2A1	TMEM181	GRIA1	CASP1	NTN5	MTMR9	EBF1	NHLH2	PRTFDC1	NLGN4X	CACNA2D4	PFDN4	SETD8	HIRA	ERC1	LCE1E	LIN54	H2AFY2	PPP2R2B
NXPH1	API5	GRIA1	TMEM252	DLX3	WASL	EBF1	DENND1A	MYO1E	PCNP	LRTM2	RPS6KB1	PLIN3	PDE7A	ERC1	CYTH3	ALPK1	LRRC8D	PPP2R2B
SLAMF1	PRKAA1	MFAP3	RAI14	CTC-360G5.1	FXR1	EBF1	FOXF2	CHST15	NAB1	LRTM2	CNOT7	HNRNPD	MOB1B	ERC1	BHMT2	RP1-32I10.10	SLITRK5	PPP2R2B
LYSMD2	USP42	MFAP3	CA5B	PWWP2B	ENPP5	EBF1	UBE3B	PRICKLE2	CLASP1	LRTM2	PSIP1	HIP1	CDK13	ADIPOR2	KRTAP4-4	CSF2RB	F7	PPP2R2B
DDX60L	PDE8A	SAP30L	MRPL38	EMC1	ATP11A	EBF1	ABHD3	NFXL1	NR2C2	LRTM2	SEMA6D	AP001652.1	MED14	CACNA2D4	EIF2S3	ELOF1	ARHGEF17	PPP2R2B
CCL28	B2M	SAP30L	KBTBD6	FCRL5	KBTBD8	UBLCP1	ENAH	BBS9	LOX	LRTM2	HMBOX1	C14orf119	LDLRAD4	LRTM2	ZCRB1	CYB5R2	EDEM3	STK32A
ATAD1	CCAR1	SAP30L	EMP1	PARM1	BTF3L4	UBLCP1	FAM196B	SSX3	SLC38A2	CACNA1C	FOXG1	PPM1H	GOLGA7	LRTM2	CDC14A	HHIPL1	NAV3	STK32A
MAP1LC3C	SENP7	LARP1	PARP8	MARK2	PTEN	IL12B	ARID4B	RCBTB2	RLF	CACNA1C	TMCC1	FGD4	ZDHHC15	LRTM2	C1orf146	URB1	IGF2BP3	STK32A
ATP5E	ZNF248	LARP1	NRBP2	CHST15	ZFC3H1	ADRA1B	MAPK6	ARL6IP5	MYT1	CACNA1C	TMEM189-UBE2V1	AMIGO3	STEAP2	LRTM2	METTL2B	SLC5A12	NSD2	DPYSL3
ZNF528	KATNBL1	FAXDC2	AK3	NF1	RMND5A	PWWP2A	ARID5B	DIRAS3	RIMKLB	CACNA1C	RSPRY1	CCBE1	LHX6	LRTM2	EN1	ZNF827	AMBN	DPYSL3
DPY19L3	PAQR8	FAXDC2	PTPMT1	EXOC4	MECP2	PWWP2A	FAM104A	UGT8	SMARCAD1	CACNA1C	SPATS2L	RSAD2	AKAP9	CACNA1C	MRPL34	TBCK	ATP2B3	DPYSL3
ZNF500	SDHD	CNOT8	CNTN6	SEMA3G	MIER3	CCNJL	ELK3	FBXL3	BCL11B	CACNA1C	SCHIP1	PSME4	NUP54	CACNA1C	ST20-MTHFS	MAGEC1	INF2	DPYSL3
PUS10	ZNF609	CNOT8	KCTD8	TMCC1	ACBD5	ZBED8	CEBPE	PKN2	JAZF1	CACNA1C	PI4K2B	EPM2A	CSDE1	CACNA1C	DRAM2	PRMT2	SLC35G1	DPYSL3
PRDX3	GEMIN8	MRPL22	WDR35	IL6ST	HPRT1	ZBED8	PDIK1L	GOLGA6L9	SIAH1	CACNA1C	TMEM189	TMEM39A	AGPAT3	CACNA1C	RP11-94B19.4	RRN3	POU2AF1	JAKMIP2
MRS2	UNC80	MRPL22	BBC3	PRDM5	LMTK2	GABRB2	LONRF3	ECT2	DNAJB9	CACNA1C	SOX2	KLRD1	FZD3	CACNA1C	FANK1	GINS3	KIAA1161	SCGB3A2
ACSL5	NFIB	KIF4B	RER1	DIS3	ADAMTS18	GABRB2	PRR15	ERV3-1	MFAP5	CACNA1C	CKLF	FAM111A	SMARCA1	CACNA1C	CLUL1	SESTD1	AQP4	C5orf46
DSG3	WDR47	HAVCR1	GINS4	CD274	SECISBP2L	GABRB2	LRP12	ZBTB6	KLHL14	CACNA1C	MIB1	ORMDL1	BRWD1	CACNA1C	FAM221A	MEX3D	TOR1A	SPINK5
DDX19A	RIMKLB	HAVCR1	ELMOD1	USP14	PHACTR2	GABRB2	NAA30	CTNS	ADD3	CACNA1C	KIAA1430	RB1	FEM1C	CACNA1C	MLN	TOMM20	WDR6	SPINK5
LSM12	SLC22A10	CYFIP2	RSPH9	IFRD2	ZFP91	GABRA6	AKAP11	GCFC2	ABI2	CACNA1C	SGIP1	MUC15	USP13	CACNA1C	PANK3	ZFHX2	N6AMT1	SPINK5
SAMD4A	IL17RD	ADAM19	ZNF443	WWC2	MAFB	B4GALNT3	PRKAA1	HAL	LRP1	CACNA1C	PCNP	LMX1A	TOMM20	CACNA1C	SLC38A1	ELF2	BNC2	SPINK5
TGFBR1	PCDH9	SOX30	SFXN3	E2F3	GDA	NINJ2	LCLAT1	OPALIN	TAF4	CACNA1C	NRBP1	SREBF2	PRR27	CACNA1C	C6orf118	ST6GALNAC6	VAMP4	SPINK5
SVIP	HFE	SOX30	MYOM3	LRRC55	SZRD1	NINJ2	KLHL3	TAF7L	PTPN12	CACNA1C	LOX	PGPEP1	TFEC	CACNA1C	ATP12A	OPCML	KCNK2	SPINK14
PPM1H	NEBL	SOX30	RIPK3	NLRC5	DICER1	NINJ2	NAA50	SPG11	SOX2	CACNA1C	TMEM33	ABHD13	PICALM	CACNA1C	RFPL3S	FOXN3	MEIS1	SPINK7
TK2	NR4A2	SOX30	SPDL1	LEPROT	PRKAA1	WNK1	FAM155A	FAM167A	BMI1	CACNA1C	TRIM44	ADAMTS3	XIRP2	CACNA1C	ASPHD2	TIGIT	CIAPIN1	FBXO38
FUT10	METAP2	LSM11	PRKAA2	RMND5A	PRKD3	WNK1	ZIC5	JMY	PTHLH	CACNA1C	DNAJC3	AHDC1	STK24	CACNA1C	TIMP1	ADAMTS6	PPP3CA	FBXO38
AMOTL2	USP1	CLINT1	ARHGAP44	DSTYK	ZCCHC14	WNK1	UXS1	DSC1	KLF9	CACNA1C	TSC22D2	RBM12B	MEIOC	CACNA1C	RPS11	TNIP1	C1orf116	FBXO38
TMEM99	GPM6A	CLINT1	IQCG	NTNG2	C5orf30	WNK1	ST8SIA5	LACE1	ATP11C	CACNA1C	FAM49B	DBT	ATAD2B	CACNA1C	C12orf73	ZFAND3	SLC7A11	ADRB2
ARL6IP5	HNRNPA3	CLINT1	ZNF655	RNF157	MID1IP1	WNK1	SMOC2	CTTNBP2NL	TARDBP	CACNA1C	ARID4B	UBR2	TMEM245	CACNA1C	SPINK4	NGFR	SLC4A11	ADRB2
GPR135	ANO6	EBF1	TMOD2	MKNK1	NRBF2	WNK1	SPOCK1	LUM	IER5	CACNA1C	AEBP2	THEMIS2	IGF2BP3	CACNA1C	NDUFB1	ABCC1	FBXL16	SH3TC2
ATRNL1	PQLC3	EBF1	FRRS1L	RPL13	R3HDM1	RAD52	GLRA3	SERPINB1	AMFR	CACNA1C	PCDH8	MKX	AP1S1	CACNA1C	CLLU1	ABCC5	LAMP5	SH3TC2
FAM60A	LYRM7	EBF1	C8orf37	ICK	TMEM55A	RAD52	WNT10A	DNAJC8	LRP4	CACNA1C	SMARCAD1	BMP7	SLC30A1	CACNA1C	MTHFS	CELF2	CUL3	SH3TC2
ETV3	DOK6	EBF1	TFG	SCN8A	GOLT1B	ERC1	SLC24A2	SLC7A14	WASF1	CACNA1C	GATA4	PRDM2	POLI	CACNA1C	TEX30	MX1	CCKBR	ABLIM3
PTGS2	RPA4	RNF145	TMEM243	PSME4	UCP3	ERC1	NEUROD1	HEATR3	GABPA	CACNA1C	BASP1	UBE2Q1	C4orf46	CACNA1C	ATG12	GIMAP1	STARD3NL	AFAP1L1
SP4	PRELID3B	UBLCP1	FAM133A	HDDC3	ARL8B	ERC1	AGPAT3	SLC25A40	SLC14A1	CACNA1C	SURF4	WDR77	PLAG1	CACNA1C	CSPG5	CENPP	TROVE2	AFAP1L1
AHR	SDHAF3	FABP6	HBG1	CTD-2368P22.1	NDEL1	ERC1	CSF1	GABARAPL3	S100PBP	CACNA1C	NCS1	SARM1	NAA50	CACNA1C	KCNC2	ADCY9	ZBTB43	GRPEL2
TMEM50A	TBPL1	FABP6	CACNB4	RNF11	TESK2	ERC1	NR3C2	PDE8B	PRDM16	CACNA1C	MAP3K5	ATXN10	BCLAF1	CACNA1C	TOMM20	LMAN1L	ACTG1	PCYOX1L
TMEM133	FNBP1L	CCNJL	MMD	TMED8	IGF1	ERC1	PTGES3	ZNF561	ZMYM4	CACNA1C	NXPH1	AS3MT	UBE4A	CACNA1C	KRTAP20-2	TP53TG3C	FAM196A	PCYOX1L
FAM208A	DENND5B	CCNJL	MSTN	SP4	ATRX	ERC1	KCNK10	RCAN3	NEDD1	CACNA1C	SPG20	TMEM87B	CASK	CACNA1C	BDH2	ZNF207	KLF9	IL17B
TMEM59	PRKG1	CCNJL	CDC45	KIAA1462	MIGA1	ERC1	ZPLD1	ANAPC16	MBNL1	CACNA1C	ERI1	PTPRK	SLC39A10	CACNA1C	EPHX4	POLR3A	TMEM241	CSNK1A1
ZMAT4	NLRC5	CCNJL	KY	TMED4	CANX	WNT5B	USP28	FAM60A	CCNYL1	CACNA1C	GOLGA7	ALG1L	SEMA6A	CACNA1C	MBD3L1	PGAM5	SSX2	CSNK1A1
ANKRD34C	TMX3	CCNJL	RPA4	C20orf151	PSAP	WNT5B	DGKH	RAB11FIP4	KLF12	FKBP4	SYS1	GALC	IMPAD1	CACNA1C	NSL1	MLC1	MAF	CSNK1A1
BMF	LYRM2	C1QTNF2	EPM2A	C18orf62	UBE3B	ADIPOR2	RNF11	SMEK1	HMGB3	ITFG2	PKIA	AMFR	PTTG1IP	ITFG2	NUDT4	EIF2C4	ITGB8	CSNK1A1
MRPS36	FRMD4A	ZBED8	ZBED5	SWAP70	KLF13	LRTM2	BHLHE40	TBC1D23	SMG8	ITFG2	SCD	TRAFD1	DDX5	FOXM1	CXCL12	BAIAP3	RBFOX2	CSNK1A1
NLRP2	EMC1	ZBED8	FAR2	ANKRD16	RAB34	LRTM2	CPEB4	SHISA3	UBE2I	TEAD4	SOX1	TEK	GLO1	FOXM1	EIF3E	FAM73B	CD22	ARHGEF37
SEMA3G	CSPP1	ATP10B	ZG16	KHNYN	ZNF3	CACNA1C	PLEKHF2	ZBTB8B	NBR1	TEAD4	VTI1B	TIMM22	ZNF217	FOXM1	MT1F	SUSD4	PDAP1	PPARGC1B
PRLR	SUV39H2	ATP10B	GPR137C	KRTAP2-1	TBC1D8	CACNA1C	CHRM2	MPHOSPH6	RNF2	TEAD4	IDS	WDR6	ETNK1	FOXM1	PPIAL4C	C1orf180	CHD1	PPARGC1B
GPATCH2	ZNF235	ATP10B	CSTF2T	MTR	LIMD2	CACNA1C	LDLRAD4	SRSF2	FLI1	CRACR2A	MYLK	ZFHX4	GPR85	RHNO1	CCDC179	TP53TG3B	SEMA6D	HMGXB3
RP11-1070N10.3	NUDT15	ATP10B	CXCL3	STAU1	CFL2	CACNA1C	HOMER1	PPP1R3D	EIF5B	PARP11	KLF6	PHF20	RPRD1A	RHNO1	PPIAL4B	EIF2C1	MAP4K4	HMGXB3
DNAJC21	H2AFV	GABRB2	NEGR1	BMP7	HOXC8	CACNA1C	DNAJC16	C14orf45	RBFOX2	PARP11	FSTL1	CDH1	PCDHA4	RHNO1	PPIAL4D	VAMP4	SETD5	CSF1R
PCDH19	PRKCE	GABRB2	AANAT	TNRC6C	RRAGD	CACNA1C	LRP1B	TMPRSS11E	BAZ2B	PARP11	MBNL3	RMND5A	PLA2G6	RHNO1	LYPLA1	TMEM241	TANC2	PDGFRB
KLF16	KLHL31	GABRA1	FGB	ARMC10	SNX27	CACNA1C	CNIH1	TMEM135	CLIC4	CCND2	SLC35E2B	NAMPTL	BAMBI	RHNO1	PPIAL4A	HMP19	CREBBP	PDGFRB
POU4F1	CFLAR	B4GALNT3	ZNF780B	XPNPEP2	SLC44A1	CACNA1C	BRWD1	ANKRD34C	TCF4	TIGAR	ZBTB8A	DYNLT3	SEMA4F	TEAD4	SLC35D3	PDAP1	RAB9B	CDX1
SLC25A40	CACNA1B	B4GALNT3	TAF13	DNAJC9-AS1	GPCPD1	FKBP4	SOX4	GPM6B	OSTM1	FGF23	ENSA	FAT2	GABRP	TEAD4	PPIAL4G	RAB9B	IRF2BP2	SLC6A7
AP001652.1	KIAA0408	B4GALNT3	NR2F6	CD247	HABP4	FOXM1	SERINC3	TAF8	CHD9	C12orf4	MTFR1	ALDH8A1	RASGEF1B	PRMT8	UBE2G1	DCAF5	RGMA	CAMK2A
ATP11A	DNAJA4	WNK1	LIPN	CCDC71	MAP3K12	FOXM1	ARL6IP1	C5orf62	B3GNT2	C12orf4	ARHGEF3	RNF11	VASH2	PRMT8	CSTF2	RAB26	TRMT1L	CAMK2A
NBPF15	FUT9	WNK1	CLEC1A	ABLIM1	PITPNM2	FOXM1	TMOD1	ASH1L	PAPOLA	AKAP3	MEX3B	PRSS23	PRKAR1A	PARP11	SNTN	GET4	TTC24	CAMK2A
TPK1	KLHL28	WNK1	ZFY	ATP8A2	TGFBR2	FOXM1	WDFY3	CA2	ARGLU1	AKAP3	ZSWIM4	PDCD1LG2	AXIN2	PARP11	PDIA5	ATG7	MX1	CAMK2A
TOLLIP	C1orf105	WNK1	ZNF235	RAB14	CAPRIN2	FOXM1	RNF145	GSC	MYCN	NDUFA9	XKR6	RNF152	PCYT1B	TIGAR	ACOT13	SSX4B	FGD4	ARSI
TIMM17A	HSBP1	RAD52	PSME3	WDPCP	FZD6	FOXM1	TSPAN3	EREG	TBP	GALNT8	COL4A3BP	CACNA2D1	B4GALT5	TIGAR	METTL2A	TTC9	C1orf21	TCOF1
PTPRB	ZNF644	RAD52	LRRC7	TOLLIP	DCBLD2	FOXM1	YTHDF2	CALN1	CBX4	NTF3	NUDT4	KCMF1	FREM1	TIGAR	CCL18	ESCO2	UTRN	TCOF1
PADI3	SEC63	ERC1	INO80D	GCFC2	NSD3	FOXM1	BAI3	KRT38	PRDM1	NTF3	SERINC1	DICER1	IREB2	TIGAR	HMGCLL1	CHN1	ZNF74	TCOF1
SLC25A24	CD302	ERC1	DEPTOR	PIAS2	SH3D19	TEAD4	USP48	KIAA0528	FGD1	ANO2	CCNYL1	GPR107	RBM39	DYRK4	KCNE3	DNAJC6	MAGI2	TCOF1
NOXRED1	LRRC2	ERC1	SLTM	SORL1	KIAA1217	TEAD4	PHF17	SALL2	WDR91	ANO2	SSR3	UFM1	SEC24A	DYRK4	VDAC2	TFRC	DPYSL5	TCOF1
MYLK	CEP162	ERC1	ATP13A2	PTAFR	PTGES3	PRMT8	CALB1	SYK	UBE2B	ANO2	EVI5	C4orf34	TOP1	GALNT8	MDM1	GOLPH3	GID4	TCOF1
COG3	EDNRA	ERC1	ZNF630	YES1	CHD5	CRACR2A	HOXD1	ZNF91	BPTF	ANO2	IKBKB	MRPL11	PSG1	GALNT8	MAGEB5	KPNA1	KCNN2	TCOF1
FLG2	PRDM4	ERC1	FAM63B	ODZ3	STK33	CCND2	ESCO2	NCKAP5	MBOAT2	VWF	E2F3	NR2F2	HMGB3	KCNA1	GOLGA8J	TET2	STMN1	TCOF1
C7orf60	WASF3	LRTM2	SSTR1	PHB	DENND4C	CCND2	MAP4	MRS2	PPP4R2	CD9	GRAP2	UBR5	FBXL17	ANO2	PTPLA	INPP5D	STAG3L1	TCOF1
MCM9	CXCL3	LRTM2	TMEM68	ARL2BP	PHF20	CCND2	TBL1XR1	RTN4	USP6NL	LTBR	NEGR1	LACE1	OTP	ANO2	TCEB1	RPL22	RAB31	TCOF1
GMPPB	STMN2	DCP1B	THEMIS2	NHLH1	SIK1	C12orf4	AR	MDH2	USP25	LTBR	ADAMTS3	ADPRH	ZBTB2	ANO2	WISP3	SCARA5	RFX7	TCOF1
TMCC1	LRRTM2	CACNA1C	IPCEF1	CTNNBIP1	ARHGAP35	C12orf4	ATXN1	GM2A	MAP4K5	TAPBPL	LMO7	ZNF286A	FMR1	VWF	SCAF11	RRP1B	SETD2	TCOF1
NBPF12	CUL3	CACNA1C	ASIC5	CALML3	LCOR	C12orf4	CNOT6	PHAX	KLF4	VAMP1	IQCJ-SCHIP1	RGMB	ADAP2	VWF	SMCO4	LIN52	USP10	TCOF1
CASP3	SYNJ2	CACNA1C	LMO2	ZNF436	BRWD1	C12orf4	SATB1	VPS13D	B4GAT1	NCAPD2	KLF4	CD83	MKNK1	SCNN1A	PON2	SLC16A14	NUP50	TCOF1
GPR61	TRPA1	CACNA1C	BTN3A1	NAA25	EDA	RAD51AP1	POU3F2	EDEM1	TAOK3	NCAPD2	MBLAC2	SENP1	CUL5	SCNN1A	MAP3K7	ASAH2	MARK1	TCOF1
SOX4	MAOA	CACNA1C	SLC31A2	AL353791.1	GMFB	RAD51AP1	F3	FAM138A	MSL2	IFFO1	ING2	CHD2	CDH6	GAPDH	ZNF493	FKBP9	MARVELD3	CD74
UTY	SETD7	CACNA1C	GAS2L3	ZNF417	CNOT4	AKAP3	RAPGEF4	GINS4	DACH1	IFFO1	ORMDL3	CTSS	MRC1	ACRBP	CXCL9	GPD1L	TNIP1	CD74
PAQR9	SETBP1	CACNA1C	FAM26E	TBKBP1	OTUD3	KCNA1	FASTK	EXD1	SECISBP2L	IFFO1	TMEM170B	AXL	GMFB	ZNF384	TMEM144	ISCU	YWHAG	CD74
SYF2	ZNF33B	CACNA1C	AC027307.3	CACUL1	YTHDF2	NTF3	SESTD1	PPP1R3A	FXR1	IFFO1	NBR1	MTRNR2L4	CPEB1	PIANP	ZCCHC6	HIVEP2	TSC22D2	CD74
ZSWIM7	ERG	CACNA1C	HIST1H2AG	AL591684.1	STARD13	ANO2	PFN2	TSG101	PCLAF	IFFO1	PIK3CA	RAB3C	ASF1A	PIANP	PLD5	PIK3R5	ABLIM1	CD74
SREK1	PTGDR	CACNA1C	ATPIF1	GLI3	PAPD4	ANO2	CLIP1	TRPM8	SLK	ING4	TMEM237	PRKACB	CCSER2	PIANP	KLRC2	ZNF512B	CCDC68	CD74
NPY1R	2020-09-14	CACNA1C	MICU3	HSH2D	KLHL20	VWF	PSD	TMEM39A	TBC1D12	ING4	KIAA0040	FAM22D	MAP3K5	COPS7A	MAGEB4	KIAA0513	KIR2DL4	CD74
BTBD7	PDGFRA	CACNA1C	PHF23	O3FAR1	LRP12	PLEKHG6	FAM73B	CACNA2D1	RGL1	ING4	AMOTL2	MDFIC	NTRK2	COPS7A	XKR4	SLC12A4	C15orf52	CD74
NAV2	2020-03-05	CACNA1C	LYRM2	RFX2	STX6	PLEKHG6	ZNF131	ZNF395	KDR	ING4	ARIH1	SAMD9L	SYNRG	COPS7A	ZPBP	PLIN4	MAB21L3	CD74
NXF2	VAPB	CACNA1C	MDM4	PTGS2	TMEM50B	PLEKHG6	MDFIC	MAN2A2	MPRIP	ING4	GXYLT1	PGM1	CEP63	COPS7A	HSD17B6	CAMK2N2	PTPN21	CD74
KCNA3	PFN2	CACNA1C	FUT9	C7orf33	ARAP2	PLEKHG6	MAPRE3	POU4F1	SLC4A4	ING4	USP25	PDE1C	BMT2	COPS7A	TM2D3	CELF4	BTBD10	RPS14
TMEM87B	PPP3R1	CACNA1C	BNIP3	INVS	FAM104A	PLEKHG6	KCNJ15	CDH1	ATL2	ING4	G6PC	GM2A	MTX3	COPS7A	CEND1	CEMP1	C18orf25	RPS14
DDIT4L	CPM	CACNA1C	FAM47E	GPR107	CSNK1G1	PLEKHG6	MEMO1	ARHGAP39	KIAA0355	ING4	CHRDL1	MCL1	TFDP2	MLF2	MGST1	BRD3	ANKRD13A	RPS14
MYO5B	PDLIM5	CACNA1C	HSPE1	BRPF1	SNIP1	TNFRSF1A	DLL1	EIF4A3	ASAP1	ING4	LRP1B	PGAM4	ITGB8	MLF2	CEP192	NPLOC4	NEURL1B	RPS14
CTSS	ALCAM	CACNA1C	STMN4	VASH2	MAPRE3	CD27	KIF13A	RIPK1	OCLN	COPS7A	CDK2	PTGDR2	MAGI1	CD4	SPINK2	ANKRD13B	JADE2	NDST1
DROSHA	USP47	CACNA1C	ANAPC13	MYLK	ATG2B	TAPBPL	INHBB	ASB5	FAM118B	MLF2	PAM	FAM84A	MBTD1	CDCA3	KLF12	PLXNA1	PXDC1	NDST1
ZC3H12B	LIMCH1	CACNA1C	PCYOX1	MAF1	ANKRD12	NCAPD2	PAK6	MARK2	ZNF423	CD4	TMEM170A	YES1	ARL5B	TPI1	ZNF812	TLX3	PDZD2	SYNPO
NBPF9	FBXO3	CACNA1C	SPRYD4	CTTNBP2NL	ARFIP1	IFFO1	CLCN5	WBSCR17	FAT3	P3H3	SLC6A11	UGDH	MELK	ENO2	RGS10	AC010536.1	ST6GALNAC6	SYNPO
FAM50B	ANKRD12	CACNA1C	GPR151	FBXL19	RTCA	CHD4	ARX	TPK1	NRBF2	CDCA3	PLS3	SCNN1G	FGD6	ATN1	C9orf170	CCNL2	MLLT1	SYNPO
JPH1	CDS2	CACNA1C	GYPE	IGFALS	ARL6IP1	CHD4	CC2D1B	LDLRAD2	NUDT4	USP5	RBM12B	GPR55	DTL	ATN1	RAD18	CACTIN	ETV1	SYNPO
GTDC1	OR7D2	CACNA1C	CCDC144A	TMOD2	PELI1	CHD4	MSMO1	ACP1	DZIP1	USP5	LFNG	ZNF561	SLC30A8	LPCAT3	NANOS1	GNB1L	CAPN9	SYNPO
ERP44	OR11A1	CACNA1C	CDK14	CDC73	MDM4	LPAR5	EDN1	SLA	GLI3	LRRC23	CSRNP3	GPAM	PCDHA9	C1S	RNF150	CACNA2D4	GPR17	MYOZ3
SCNN1G	ST6GALNAC2	CACNA1C	DKFZP779J2370	YWHAG	PHF14	PIANP	BMP3	EMB	GATA4	ATN1	SNAI2	FAM107B	SOX5	C1S	MTX2	SMIM1	WDR47	MYOZ3
GJD2	SH3TC2	CACNA1C	CLDN18	UBE2L6	RAB14	PIANP	DCAF8	ICK	NXPH1	ATN1	CITED2	MBNL1	SMURF2	C1S	BCLAF1	AAGAB	NGFR	MYOZ3
FYCO1	MAP3K7	CACNA1C	B2M	ZDHHC1	GTF2H1	PIANP	BTAF1	DEPDC1	SH3PXD2A	PTPN6	SYDE1	SP4	ARID4B	C1RL	FXYD3	WDR37	MFSD6	MYOZ3
PRPF38B	ZXDA	FKBP4	STAU2	GPAM	MXD1	PIANP	PEX5L	C15orf26	PAM	PTPN6	PHACTR3	CBX6	ABRAXAS2	RBP5	LIMA1	OLFML2A	ROCK2	RBM22
LDHD	PTBP2	ITFG2	PATE4	FAM105A	ATP6V1B2	MLF2	SNIP1	SPRYD4	MYB	PTPN6	FAM81A	MRPS16	CNOT6L	CD163L1	OR2H1	FBXL7	COX10	DCTN4
GCFC2	RSU1	FOXM1	CD200R1	TTBK1	SLF2	TPI1	OTX2	ORMDL1	GABBR2	C1S	CCSER1	ARHGAP29	CTTNBP2NL	CD163L1	TNFAIP6	C15orf52	TAOK3	DCTN4
TOPBP1	EVI5	TULP3	HIST1H3F	YWHAH	SERINC3	SPSB2	GMFB	PLEKHF2	ZBTB38	C1S	DIRAS2	SENP8	RFX3	CD163L1	PPAPDC1A	PRKX	RAPH1	DCTN4
MAP7D2	C5orf42	TULP3	KIAA1524	GSTM4	DNAJC16	ENO2	NUDT10	NAV2	HDHD2	C1S	UBE2D1	TIMM17A	ECM2	CD163L1	MAOA	C22orf26	TOM1L2	DCTN4
FRMD4A	ZNF770	PRMT8	POU5F1B	SYK	CCDC88A	ATN1	LARP4B	ANKRD20A3	ARHGAP6	ACSM4	TRIM33	CDC40	KCNIP4	CD163	NUP62CL	TCN2	PECAM1	DCTN4
ZNF543	MUC15	PRMT8	C10orf11	ASB6	TCF4	ATN1	BTBD7	MCM9	PPP2R2C	GDF3	CBL	ANKRD36BP1	PCDHA1	CD163	CHST9	ZCCHC14	TPST1	DCTN4
C5orf30	SSX2IP	PRMT8	PSTK	SLC30A1	PRICKLE2	ATN1	CD2AP	MCMDC2	CERS6	SLC2A14	CALU	GRAMD3	ATP2C1	CD163	CNRIP1	BTBD9	PTBP3	DCTN4
ZBTB44	RAI14	PRMT8	UGT2B7	GAB1	CREB5	ATN1	CNOT7	ANKRD20A4	ZC3H15	SLC2A14	MARCH6	THBD	DTD2	APOBEC1	FAM114A1	DVL3	C16orf72	DCTN4
ZNF189	AGL	CRACR2A	NUTF2	AP4S1	HOXA3	EMG1	FAM13A	ALAD	EDNRA	SLC2A14	BHLHE41	POLR3E	FCHO2	GDF3	CYB5R1	SEPN1	SLC20A1	DCTN4
DMRTC2	YLPM1	CRACR2A	WFDC13	KIAA0895	PIKFYVE	C1S	MB21D2	EIF3A	DPY19L1	SLC2A14	RAPGEF2	FNDC3B	B3GNT2	DPPA3	NAA50	SYNJ2	INO80D	DCTN4
DDX55	NFYB	CRACR2A	SEPW1	TLR5	NRP2	C1S	SPRED1	ZNF286A	DDX3Y	FOXJ2	ANLN	GGA3	ZNF143	CLEC4C	PSG1	IL32	RAB7A	SMIM3
NUDT3	ZPLD1	CCND2	MTMR2	STOX2	BTBD7	C1S	ARL4A	MTMR2	BCL9	C3AR1	LARP1B	FAM220A	MAP3K2	CLEC4C	HTR7	C1orf158	ZNF618	IRGM
BRI3BP	EGR3	CCND2	ZNF415	SCUBE3	KMT2C	C1RL	PCGF5	LRRK1	PCNX1	CLEC4D	MTSS1L	LRRC27	ZIC4	SLC2A14	TRDMT1	TJAP1	EHD2	ZNF300
TREML4	IPO5	TIGAR	HAUS1	MYL3	PFKFB3	C1RL	FAM43A	SESN2	THAP1	CLEC4E	ACVR1C	TTPA	MAGT1	SLC2A14	PPP1R32	TMEM120B	GABARAPL1	ZNF300
L1TD1	NTN1	FGF23	AC005609.1	AXL	CENPO	CLSTN3	PLLP	ZNF45	NCOA7	AICDA	ELF2	RAB7L1	PCDHA5	SLC2A14	ORC5	C22orf34	TMEM35A	ZNF300
BRPF3	ZBTB44	C12orf4	KRTAP4-1	VSX2	CHMP3	CD163L1	EGLN3	ATXN7L1	IP6K1	AICDA	PLCG1	ZNF451	PLS1	SLC2A14	FBXO5	DLGAP4	ATRN	ZNF300
DHX8	AICDA	C12orf4	CYP7A1	NID1	LYSMD3	CD163L1	TACC2	PRDM5	CNTN4	RIMKLB	KLF12	ZNF321P	PCDHA2	SLC2A14	CKS1B	LGI3	AKAP7	ZNF300
AC104942.1	RBM12	DYRK4	HLA-F	C6orf57	FERMT2	CD163L1	FXR1	RNF103	UBQLN1	A2ML1	TAF12	LRBA	PCDHA3	SLC2A14	KIAA0513	BTNL3	DUSP16	ZNF300
PIAS2	PDS5A	AKAP3	SLC15A5	ACTR1B	EIF4E3	CD163L1	ARAP2	C6orf123	MEX3B	A2ML1	RHOT1	ZNF709	TOX3	SLC2A14	CNR1	IGSF5	DIAPH2	ZNF300
MLANA	DLL1	AKAP3	BACH1	BAHCC1	ARHGAP21	CD163	DCP2	ZNF684	KDELC1	PZP	SRSF1	LIX1L	XKR9	SLC2A14	WDR86	WDR3	MBNL1	ZNF300
MEOX2	MACF1	KCNA6	DNAJC24	SPRED1	TRIM37	CD163	GRB10	ZMAT4	AMOTL2	CLEC1B	CORO1C	CTNND1	SIX4	SLC2A14	FAM83F	SEC14L2	MSANTD1	ZNF300
RNF169	SOBP	KCNA1	C16orf72	METTL13	PURG	SLC2A14	PPP1R15B	ADRB1	PPP2R5C	CLEC1B	TBK1	TXLNA	FNBP1L	SLC2A14	G0S2	LDOC1L	WIPF1	GPX3
FAM172A	WDR11	KCNA5	ARL8B	TBC1D9	PDIK1L	SLC2A14	GAP43	ARHGAP11A	PAK5	CLEC1B	ARHGAP19	ZNF770	NR3C2	SLC2A14	TARBP1	HEG1	MED20	TNIP1
PDLIM5	JMY	ANO2	TYSND1	MFAP3L	CSF1	SLC2A14	BBX	EML4	KAT2B	CLEC1A	SLITRK1	FKBP10	TLK1	SLC2A14	CCDC73	TFAP2C	NAV1	TNIP1
HLA-F	TMEM26	ANO2	NAPEPLD	SPON2	DCP2	SLC2A14	SPOPL	DNAJC9-AS1	ANKRD28	CLEC1A	PCSK2	CACUL1	DKK1	SLC2A3	PLP2	CBY1	SACM1L	TNIP1
PHB	DCLK1	VWF	CREG1	KIRREL	RAB1A	SLC2A14	UTS2B	DCDC2	SGIP1	CLEC1A	SLC39A14	GNB5	PCDHA7	FOXJ2	C7orf63	CABLES1	ICMT	TNIP1
NID1	DLC1	CD9	PRKCI	B4GALT6	IER3IP1	SLC2A14	HRK	P4HA2	LEPR	KLRD1	MXD4	ACSF3	STK39	CLEC4A	CCDC158	TOX2	TTC9	TNIP1
ACP1	ZMAT3	CD9	DNAJB14	GALC	NPNT	SLC2A14	ARFIP1	POLR3E	PPFIA1	KLRD1	TAOK3	TMEM135	CCDC117	CLEC4A	DSC3	DHFR	TAB2	ANXA6
CACNA2D1	SLC9A6	PLEKHG6	AC007390.5	TMEM2	NABP1	SLC2A14	TNFRSF1B	CWC27	ACE2	KLRD1	GPR146	PKNOX1	ABHD3	CLEC4A	TMEM59	ATN1	MAML3	ANXA6
VEZT	STK32B	SCNN1A	SETD9	CDC42EP3	NAA30	SLC2A14	FANCA	C1orf88	FBXW11	KLRD1	ACE2	HNRNPU	VCPKMT	CLEC4A	PEX1	LDLRAD1	MYOCD	ANXA6
PLEKHF2	ZHX2	SCNN1A	GFM2	AL121758.1	CHIC1	SLC2A14	VMP1	GALC	KLHL3	EIF2S3B	SELK	CHRNA5	SS18L1	FAM90A1	KLK10	SLC6A5	MORF4L1	GM2A
MBNL2	PLCB4	SCNN1A	GPR63	CLDN1	TSHZ1	SLC2A14	GMNC	SNX29	ROCK2	EIF2S3B	PLCL1	GPM6B	TRAPPC11	FAM90A1	RALA	HIPK2	TRIM2	SLC36A3
TSPYL5	ASPA	SCNN1A	SLC18A2	EMB	GPATCH8	SLC2A14	TMEM63B	BIRC6	TIMP2	TAS2R8	RUSC2	TTC21B	RTKN2	AICDA	IL3	RNF39	IKZF2	SLC36A3
TMEM105	NEDD4	SCNN1A	GPR88	NGB	NBEA	SLC2A14	PLAA	AC005754.1	KHDRBS1	PRH2	RAB11FIP2	GEN1	PWWP2A	AICDA	CPXCR1	SPTBN4	PDK1	SLC36A3
ASIC5	GLYAT	LTBR	MYCT1	FAIM2	SBF2	SLC2A14	S1PR2	ZMYM4	TBC1D22B	PRH2	PHF6	RGPD2	ZMYM2	RIMKLB	APBB2	YPEL2	PRRG2	SLC36A3
NCR3LG1	RSBN1	LTBR	AL353698.1	SERPINB8	HOMER1	SLC2A3	KIAA1468	TNRC6C	ULK2	TAS2R19	ZNF423	ARMC10	MAF	RIMKLB	GOLGA8F	C22orf45	MPPE1	SLC36A2
CTNND1	HERC3	LTBR	WFDC5	SLC31A1	OGT	SLC2A3	FAM46B	SYT9	NRG1	SMIM10L1	RABEP1	RPGR	ARL4A	RIMKLB	TBC1D3H	ZHX2	SLF2	SLC36A2
ADAM17	SPDL1	LTBR	ACTR3	GRIA1	SEL1L3	SLC2A3	GADD45B	DLEU2L	PTPN13	ETV6	VEGFA	GADD45A	ZNF292	RIMKLB	APOC1	BTK	HDLBP	SLC36A2
HLA-DRB5	CHD7	LTBR	PLEKHF2	C3orf70	SLC6A6	C3AR1	CNOT6L	PTPN11	KLF10	BCL2L14	NREP	SCIN	FGF13	A2ML1	IGIP	PPARGC1A	PPM1H	SLC36A1
SH2D1A	CCM2	TAPBPL	JMY	USP51	CCDC6	C3AR1	ACBD3	PCDHB15	NUFIP2	BCL2L14	KIF13A	RBM46	KCNJ13	A2ML1	GSAP	LTA	PISD	SLC36A1
SERPINB8	GPR12	VAMP1	PAQR3	XXYLT1	ZIC5	C3AR1	LRP6	CHD2	JCAD	BCL2L14	HLF	ATRNL1	ZBTB10	M6PR	GRIA3	SAMD13	PGAM5	SLC36A1
NDN	ANGPTL5	VAMP1	FGL1	SLC5A3	ST8SIA3	CLEC4A	EFR3A	PAIP1	PRKAR1A	LRP6	TLL2	C1orf173	SLC12A1	M6PR	MRPS36	N4BP1	KIF5A	SLC36A1
RCAN2	CFAP47	VAMP1	ZNF561	MBLAC1	PLAA	CLEC4A	TRIM37	ABCB1	RBFOX3	LRP6	DNAJC5	SLC27A6	GPD2	KLRG1	COCH	WDR5	APOBEC3F	SLC36A1
C16orf72	FOXA1	VAMP1	IL3RA	GPATCH2	CUL5	CLEC4A	FUT9	HOXB3	SLC4A7	LRP6	GLI3	TAP1	PCDHA8	KLRG1	TRAPPC3L	HEATR2	RHOT1	SLC36A1
SALL2	BCKDHB	NCAPD2	CKAP2	C1QTNF7	SPART	CLEC4A	HOXB3	CEACAM8	RBFOX1	LRP6	FN1	PTPLB	PREPL	A2M	SSR3	CCDC102A	PDZD4	SLC36A1
ZNF91	PAPPA	NCAPD2	GPR12	EGR2	SFMBT1	CLEC4E	NAP1L3	AC093802.1	TRIM2	LRP6	SCRT2	TMEM183A	SLC35F3	A2M	PRNP	RHOBTB3	SORBS1	SLC36A1
STBD1	CCDC89	GAPDH	VAPB	RB1	HOXB3	MFAP5	ZNF800	SH3BGR	MAP1B	MANSC1	KBTBD6	IL20RA	KDELC2	A2M	CA8	LRRC58	PROK1	SLC36A1
MAPK8	YAP1	GAPDH	GLYR1	CACNA2D1	PPP6R3	MFAP5	FGF10	ID2	FOXN2	MANSC1	TTC33	GOLGA6L9	ATG14	PZP	CNIH1	LEPROTL1	SMG1	SLC36A1
MYC	SRPK1	GAPDH	SLC9A3R1	C5orf62	SLC9A2	MFAP5	TGFBR1	GLO1	DCUN1D1	BORCS5	CDH11	DPYD	CDK17	PZP	RAET1E	ZFPM1	AMMECR1	FAT2
FAM111A	HOXC9	GAPDH	TMEM65	TESC	ANKIB1	RIMKLB	EOGT	ANKRD20A2	BAP1	BORCS5	S100PBP	SDR42E1	YIPF6	CLECL1	TRIM34	ACHE	WDR7	FAT2
PLAGL1	SYPL1	IFFO1	TMEM52B	ARHGAP42	SATB2	RIMKLB	THRA	MYC	KANK1	BORCS5	CNKSR3	SS18L1	MAP2K4	CLECL1	ZBTB37	PARK2	TPD52L2	SPARC
DR1	TMEM251	IFFO1	RIC3	CANT1	JAKMIP1	RIMKLB	TSC22D1	TBC1D9	ARHGAP19	CDKN1B	BAZ2B	ATAD1	LRRC8B	KLRF1	RASSF6	MUC4	AMER3	SPARC
ANGPTL7	PRKCI	IFFO1	SMIM14	LMBR1L	CYB5R4	RIMKLB	AKAP1	ZNF333	RABIF	APOLD1	NUP35	EPN1	C3orf70	KLRF1	ASF1A	MOCS1	ST6GAL1	ATOX1
UHRF1BP1	ZBTB38	IFFO1	IL22RA2	ADPRH	CASD1	A2ML1	RND2	UHRF1BP1	GATA2	APOLD1	FHOD1	COL5A1	CBR4	KLRF1	NSRP1	POC1B-GALNT4	KLHDC10	G3BP1
EPS8	RAB8B	IFFO1	THAP5	HK2	XPO4	A2ML1	CYP2U1	PPP2R2D	LEMD3	GPRC5D	MSL2	TRHDE	ADNP	CLEC2B	C3orf38	ZKSCAN5	USP47	G3BP1
WDR77	CLN8	IFFO1	RP11-113D6.10	FOXL2	WNK1	A2M	PPP6R1	LRRC55	KCTD8	GPRC5D	HNRNPH1	INTS9	GABPB1	CLEC2A	TOMM6	ZNF148	BAIAP3	G3BP1
TMEM41A	DGKB	CHD4	FAN1	CIDEA	NFIB	PZP	S1PR1	KHDRBS2	DNMT3A	GPRC5D	HS2ST1	GRAMD1C	HNF1B	CLEC12A	UGT3A1	RABEP1	BACE1	G3BP1
NOL10	ZNF175	CHD4	LRRTM2	APOBEC3G	TTYH3	PZP	NR2C2AP	CPXCR1	LFNG	GSG1	MBOAT2	SORL1	PCDHA11	CLEC12A	ASAH2B	RBM12B-AS1	DCLK1	GLRA1
WIF1	FAM107A	LPAR5	NAPB	CBX6	CCT6A	KLRB1	VGLL4	CDCA4	ARIH1	GSG1	SLC16A2	BBS1	DUSP22	CLEC12A	SLC12A1	OTX1	PHC3	GLRA1
ARHGAP42	HTR7	LPAR5	ADH1A	GALNT4	CPEB2	CLEC2D	MAT2B	FAM110C	VEGFA	GSG1	FBXL17	MAP7D2	CD44	CLEC12A	SURF4	DENND5B	ARHGEF12	GLRA1
SPTLC3	HAS2	ACRBP	B3GAT2	ACSL5	SLMAP	CLEC2D	USP47	PTGS2	SHC1	GSG1	FNBP4	LRRC16A	CERKL	CLEC12B	TSPAN2	COBL	AKAP9	GLRA1
ICAM1	BOLL	ING4	GABRE	RRH	SPOCK1	CLEC2D	PRRG4	BCHE	DMD	GSG1	KIAA0355	MFAP5	CDK6	OLR1	TOB1	RPS15	NAT14	NMUR2
PRKACB	SSR3	ING4	MAFK	C14orf101	GSE1	CLEC2D	PTPN4	KAL1	GPATCH8	GSG1	SCAMP1	SLC7A14	TGM2	OLR1	PNO1	MXD4	FAM218A	GRIA1
ATXN3	TMEM50B	ING4	AICDA	GPR55	NOL4	CLEC2D	EDA	TTR	DTNA	GSG1	PRKAR2B	PKHD1	2020-03-01	OLR1	ACR	EPB41L5	TNS1	GRIA1
SLC3A1	BZW1	ING4	UGT2B28	NEURL4	FAM46B	CD69	CAMSAP2	WDR77	CNOT6	GRIN2B	MAP4K3	PADI3	BDH2	KLRC4	PARP3	IL17D	CHRNB1	GRIA1
DSP	UBR1	ING4	ZNF717	UBR5	MYB	KLRF1	CAPRIN2	LIX1L	SRSF2	ATF7IP	HNRNPU	EIF3A	SLC1A1	TAS2R13	PTPRCAP	KDSR	DOT1L	GRIA1
FNDC3B	KCND2	ING4	ADH6	CD83	CCDC85A	KLRF1	PHAX	THBD	SGCE	ATF7IP	PRKAR1A	SLC3A1	MXD1	TAS2R50	FAM25E	ROR2	TECPR2	GRIA1
CDKL2	CNOT4	PIANP	C6orf118	SPTLC3	DCUN1D4	KLRF1	EXOC5	IQCG	R3HDM2	ATF7IP	KCTD15	UGT1A10	CAND1	TAS2R20	MBIP	SPOPL	RUNX2	GRIA1
NUP62	C17orf47	PIANP	ZBBX	SF3A2	ACBD3	CLEC1A	ZCCHC14	KLHL21	TAF12	ATF7IP	SEMA3F	AC078953.1	NANOS1	TAS2R46	IGFBP1	ZMIZ2	ERP27	GRIA1
EPOR	MKRN1	PIANP	IL6ST	JPH1	FANCA	CLEC1A	UBE2D1	DNAH5	TRAPPC8	ATF7IP	SECISBP2L	C18orf63	TMEM167B	BCL2L14	PRDX3	GNA15	NRP2	GRIA1
PRKAG2	SLC15A5	PIANP	SLC51B	PCDHA8	SRSF2	CLEC1A	FSD1L	SETD8	EIF2B5	PDE6H	GLIS2	MAGI3	KATNAL1	LRP6	TFEC	SLC6A6	OBSCN	GRIA1
MCL1	TRPC6	PIANP	IQGAP2	PCDHAC2	WNT2B	OLR1	PAX6	TAF1B	VAT1L	RERG	TMEM229B	UGT1A5	METTL21A	MANSC1	LGI2	SMG1	KCNK5	FAM114A2
COMMD8	CPD	PIANP	C9orf64	SLC25A40	IQGAP2	OLR1	FOSL2	KCNA3	UBE2D1	RERG	FAM219A	SELL	ELOC	BORCS5	AGBL3	CCDC97	SERTM1	FAM114A2
XRCC6BP1	MYEF2	COPS7A	KDM4E	STK17B	MMGT1	OLR1	IQGAP2	OAZ1	CYP1B1	PTPRO	PTPN12	GINS4	LRRC19	BORCS5	ARL5B	PREPL	DYNC1LI2	FAM114A2
HAL	SAMD4A	LAG3	GPN1	CLIC2	CNR1	TMEM52B	ABCB7	AP4S1	NCOA3	PTPRO	MGAT2	SNX16	PRDM1	BORCS5	CAPZA2	LGSN	DLGAP4	FAM114A2
ABHD13	IL12A	CD4	OR11A1	ZNF543	KLF3	TMEM52B	CHMP4B	HTATSF1	PLCG1	EPS8	LRP4	HMGCR	CREBZF	BORCS5	TMEM132B	ADCY7	ZMIZ1	FAM114A2
FCHSD2	PNRC2	CD4	RP11-204N11.1	HDHD2	ATG14	TMEM52B	PSAP	TOPBP1	CAB39	EPS8	PDIK1L	PRPF38B	TWF1	BORCS5	GABRG1	COX10	TOMM70	MFAP3
ALG6	CCDC144A	CD4	UBE2G1	CENPN	APCDD1	KLRD1	KIAA1211	PNPLA8	SDC2	EPS8	RELN	XRCC3	ALG13	BORCS5	C17orf77	SAMHD1	ZNF697	MFAP3
BNIP2	ITGA6	GPR162	SEC63	TBC1D12	MYT1L	KLRD1	PNRC1	ST8SIA4	FIGN	EPS8	KHDRBS1	POC1B	MIER3	DUSP16	SNAPC5	HUS1	SEMA3A	MFAP3
GRM4	VGLL3	CDCA3	LY75	CRISP1	MAP3K20	KLRD1	CDKN1A	NEDD4L	PPP1R10	EPS8	LMAN1	RAP1GAP2	SLC26A4	DDX47	GOLGA8K	BDKRB2	ATP6V0C	MFAP3
NUP214	MSTN	CDCA3	LY75-CD302	RP11-422N16.3	NEUROG1	KLRD1	MPPED2	DCLK2	SYVN1	EPS8	GPR158	SERPINB7	RNF150	FAM234B	CCDC149	INPP5A	SATB2	GALNT10
VPS26A	DKK3	CDCA3	FOXO4	VPS26A	CD2AP	KLRC3	BARHL2	CKS2	PARD6B	LMO3	B3GNT2	RBM33	ATP2B1	GRIN2B	ASB14	SLC4A4	TCHP	SAP30L
TSPAN7	NEDD1	CDCA3	BARHL2	APBA1	LRP6	KLRC2	HIAT1	GK5	ATP2A2	LMO3	PPP6R3	PRKD3	RAD51AP1	GRIN2B	CDKN1B	CSNK1E	AFF2	SAP30L
PRPF4B	EPB41L4B	USP5	RPL7	FAM199X	ARHGEF12	EIF2S3B	ZFYVE9	HDAC5	GPR158	NSMAF	NFYA	GBAS	C5orf63	GRIN2B	TRIM59	AC133485.1	SRPX	SAP30L
YARS2	BRPF3	USP5	STK32B	VWA3B	BCL2L11	MAGOHB	SYT10	CDCA7	PDCD10	NSMAF	OCLN	UCK2	FAM208A	GRIN2B	NUP35	TMEM40	NAP1L1	HAND1
NOTCH1	SOX11	SPSB2	TMEM41B	CDCA4	FRZB	MAGOHB	CEP55	C5orf30	MEX3C	CA8	PHF21B	ANKRD17	ARHGEF7	PLBD1	AQP9	C21orf128	ZNF449	LARP1
FGD4	MICU3	SPSB2	C3orf58	RSBN1L	FAM43A	STYK1	SMAD5	NOMO3	FRS2	ZNF592	KIAA0895	GNAQ	TMEM56	GUCY2C	ZKSCAN1	SLC6A12	ASCL1	LARP1
GNAQ	ZBTB11	C12orf57	KRTAP9-8	SLC25A25	NCKAP5	TAS2R7	CCDC6	PANX1	PTBP1	ZNF592	KIAA2018	GCNT4	SLMAP	SMCO3	AC008267.1	KAT6A	ZRANB1	LARP1
MKI67	HDAC2	C12orf57	RBM3	ZFHX4	CREB1	TAS2R9	FERMT2	MPC1	C6orf62	ZNF592	MMP16	WDR59	HOMER1	ART4	PRR4	RAB3B	CLASP1	LARP1
CD83	IYD	C12orf57	KDM4C	TPD52L3	PTPRD	TAS2R14	HEG1	BMP7	PMAIP1	ALPK3	OSBPL11	AL391421.1	TNFSF11	ART4	FTO	NCAM1	LAMP1	FAXDC2
OAF	MLF1	C12orf57	PTH	DMRTA2	CPEB3	TAS2R31	GTF2H1	NEK8	FUBP1	SLC28A1	FRMD4B	RFX2	RPP14	MGP	STK25	PKNOX2	SSX4	CNOT8
GINS4	F5	PHB2	RCAN2	LIMA1	PFN2	SMIM10L1	MFSD6	LPAR3	ZNF711	SLC28A1	WIPF3	RBM44	CD28	MGP	SUZ12	ST6GALNAC3	KIAA1755	CNOT8
RFX2	RLF	PHB2	MARK1	TMEM187	EDN1	ETV6	BAG5	PARM1	AFF3	SLC28A1	NCOA2	NRARP	VPS37A	ERP27	TYW3	ARHGEF17	C8orf86	CNOT8
OLFM3	PTPN1	LPCAT3	RPS29	ATG2A	TSPOAP1	ETV6	NCKAP5	ACSL5	VASH1	SLC28A1	PAN3	SBK1	VTI1A	ERP27	AC022431.2	B3GALT5	PLK1	CNOT8
CD302	DGKE	LPCAT3	PRKAR2B	FAM71F2	PIK3C2A	LRP6	PLCL2	PTPRK	PALM2	AKAP13	RAB18	ECT2	FAM20B	ERP27	FNDC7	PLEKHG4B	FAM60A	CNOT8
MKX	NIPBL	C1S	ENAH	NEUROG3	RACGAP1	LRP6	KLHL20	DMRT1	TIAL1	AKAP13	ARL6IP6	VSX2	FOXP2	PTPRO	IQCA1	MYT1L	ADCY1	CNOT8
NLRC5	FOCAD	C1S	KRTAP9-2	MARVELD3	CLCN3	LRP6	MAPK1	NALCN	ETV5	AKAP13	NYAP1	MSR1	NPY2R	PTPRO	RBM41	FLNC	ZNF512B	CNOT8
ATG14	EPM2A	C1S	ELP4	ZSWIM7	SOX5	LRP6	UBB	NKX3-2	ASH1L	AKAP13	SUGT1	ARV1	SRRM1	PTPRO	GOLGA8O	FOXP3	RIT1	CNOT8
GYPE	HNRNPC	C1RL	ZSCAN12	PNMA1	ARHGEF4	LRP6	FAM155B	RNF169	CNOT7	NTRK3	PPP2R5E	MAB21L2	PCDHA10	PTPRO	RP11-162A12.2	ZXDB	CACNA2D2	CNOT8
MORC3	BTRC	C1RL	LRRC2	FCHSD2	TEX2	BORCS5	NOL4	PLGLB2	TMEFF2	NTRK3	CYTH1	VPS26A	FZD8	PTPRO	RMDN1	MAB21L3	SEMA6A	CNOT8
CSDA	NEK2	PEX5	TMEM200A	GPD1	USP8	BORCS5	TAF4	SVIP	KMT2E	NTRK3	C11orf87	EMB	RER1	PTPRO	PRLR	SIM1	PLXNC1	CNOT8
BORA	CYP7A1	PEX5	EDNRA	KLHL21	TOB2	BORCS5	CYLD	COQ5	BRWD1	NTRK3	CUL4A	NAA25	DENND4A	PTPRO	MT1A	ZNF449	MEF2C	MRPL22
DKK3	AGPAT5	PEX5	PRNP	SLC7A14	CLCN6	BORCS5	KIAA0319L	MUC15	NTRK2	DET1	VCPIP1	ATF5	ABCC4	PTPRO	FAM216B	FBXO31	CAND1	MRPL22
RBM44	SLC19A2	PEX5	NR4A2	IQSEC2	TMEM63B	BORCS5	MYO10	PIAS2	FRMD4B	DET1	FLT1	ZNF214	EN2	PTPRO	ATG4C	ADAMTS5	BRD3	MRPL22
AL121758.1	DPYSL3	PEX5	DNAJC9	KIAA1841	ARID5B	DUSP16	CCDC85A	ODZ3	CTNND2	DET1	ZBTB12	AP2B1	DUSP28	PTPRO	FEM1B	BAZ2B	DEAF1	MRPL22
DMRT1	LNPK	PEX5	CCSAP	LDOC1	CHMP4B	GPR19	WRN	CA8	CHMP5	DET1	FRS2	SNX12	NUFIP2	STRAP	KRTAP19-1	SERTM1	KPNA4	KIF4B
DIEXF	ARID4A	ACSM4	CHGB	UGT1A5	TSPYL2	GPRC5A	UBAP2L	ZNF521	BAG5	DET1	ZC3H6	ISM2	VKORC1L1	DERA	NPPB	DRD5	DNAJC6	KIF4B
GLO1	SPCS3	CD163L1	DCUN1D1	TRPM5	IKZF4	GPRC5A	RLIM	CTSC	COL4A3BP	DET1	ARIH2	NOTCH2	MEGF9	DERA	ALCAM	NPTX1	PFKFB2	SGCD
CHAC2	IL1RAP	CD163L1	FGF13	ZNF248	IGSF3	GPRC5D	AGO4	NMT2	NIN	ABHD2	PTPN11	RUSC1	SSR3	SLC15A5	HPS5	MNT	ABCC5	SGCD
FAM84A	TMEM196	CD163	C2orf73	UGT1A10	MTMR10	GPRC5D	ALX4	ZNF713	RFX7	ABHD2	SDC2	CCDC109B	MRPS36	SLC15A5	THOC7	RUNX3	NKAIN2	SGCD
UBR5	PCLO	CD163	PCNP	TBX5	HSPA8	FAM234B	SLC35F3	YPEL5	CACUL1	ABHD2	CDYL	CIRBP	FSTL5	MGST1	FTSJ1	PPP1CB	TLK1	SGCD
CAMKMT	ZC3H15	CD163	PRELID1	TMEM87B	TRIM3	EMP1	WRNIP1	HNRNPU	CHD1	FANCI	KANK1	XKR7	PCDHAC2	LMO3	PHYH	MLL2	KCTD16	TIMD4
MRTO4	AFDN	CD163	PRDM4	APMAP	TANC1	GRIN2B	KIAA2022	TMEM183A	RPRD1A	FANCI	USP6NL	CRB1	SIRT1	LMO3	CTXN2	CCL18	SUPT7L	TIMD4
ACSL3	RAPGEF6	CD163	ASPH	MMD	PPP6R1	GRIN2B	SETD7	STAT5A	SCHIP1	FANCI	PLCXD3	CHCHD2	SLC26A2	LMO3	GOLGA8R	BARD1	NHS	HAVCR1
TBC1D9	FZD7	CD163	MORN2	GRPEL2	CAMSAP2	GRIN2B	MEX3D	PATZ1	SUPT20H	FANCI	TIMP2	NDN	CBFB	LMO3	TRAM2	INHBB	MLC1	HAVCR1
RNF157	TLN2	CD163	GDF5OS	PLA2G5	FASTK	WBP11	SHANK2	TMEM159	CRTAP	FANCI	ELMOD2	ELOVL7	ZFP91	LMO3	CNOT8	NMNAT2	PDE3A	HAVCR1
KHDRBS2	LRRC75B	CD163	ARL4C	BACE1	TGOLN2	C12orf60	ARHGEF26	PGM5	MYLK	TICRR	DHX36	GPR17	PIGA	LMO3	COA6	MGRN1	PEX5L	HAVCR1
PKHD1	TBC1D9	CD163	NUS1	LMX1A	RB1CC1	C12orf60	EIF4E3	CCR1	PCDH7	TICRR	UBA6	SNX29	GPAM	LMO3	PAG1	NFIC	SLC6A6	HAVCR1
DIRAS3	WDR36	APOBEC1	HRK	ORMDL1	LRP2	SMCO3	MCTP1	KCNK2	MAP3K1	TICRR	ZNF771	ANKRD62	MANEA	LMO3	SMIM15	CTIF	ADGRA1	HAVCR1
ANKRD36BP1	DIP2B	CLEC4C	IFNE	C2orf54	PPP1R15B	SMCO3	BTBD3	RBM46	ITPR1	TICRR	VTI1A	KLK11	TFCP2L1	LMO3	GVQW1	AC011484.1	ABCA2	HAVCR2
MAPK9	UHRF1BP1	CLEC4C	SETD3	FAM60A	UBC	PTPRO	TIMP2	AMFR	RUSC2	PEX11A	DDX26B	ADAM17	ATP10D	LMO3	IAPP	KIAA0284	RAD21	HAVCR2
CXorf48	LGR6	SLC2A14	RP11-867G23.8	LL22NC03-63E9.3	UXS1	PTPRO	REEP1	ZNF709	TRIO	WDR93	AMFR	HPGDS	DCAF12	NSMAF	TBCEL	PPFIA3	C2CD2	MED7
KRIT1	ATP2B1	SLC2A14	SLC25A53	ZNF544	UHRF2	PTPRO	MDGA2	ELOVL6	ZIC3	ANPEP	PTGDR	IL21R	BAHD1	NSMAF	ZNF878	SHISA7	SLC9A8	MED7
GRIA1	ELK4	SLC2A14	SULT1B1	DDX51	NIPA1	PTPRO	PIKFYVE	ZNF724P	SLC5A3	ANPEP	ETS2	COL19A1	ERAP1	TOX	SMARCAL1	PLA2G2F	DSC3	MED7
ZNF561	CREBZF	SLC2A14	ZNF677	ARHGAP29	EOGT	PTPRO	MAP3K12	DDIT4L	FRMD6	ZNF710	GNAI3	YKT6	ITPK1	TOX	MAPK10	AP2A2	WWC2	MED7
SULT1C4	SPHKAP	SLC2A14	PDLIM5	HLA-DRB5	PTPN4	PTPRO	ITPR1	SPRED1	CDK2	IDH2	ZNF292	PRR9	EDEM3	CA8	EXOC8	GMEB2	HHIP	MED7
APMAP	L3MBTL3	SLC2A14	ETF1	SNX16	ATP2B2	PTPRO	COX7A2L	MAGEA10	GEM	SEMA4B	EIF5B	CLDN20	LARP1	CA8	GPX6	ILF3	SV2B	FAM71B
SOX11	TMEM65	SLC2A14	GOLGA8J	APBB1	IL6ST	PTPRO	TBPL1	SLC27A6	VEZF1	SEMA4B	PTPN13	ATG14	PTPRC	ZSCAN2	KLRF1	PLVAP	CNTNAP5	ITK
BTBD1	PGK1	SLC2A14	PIGF	PTGDR2	FAM13B	DERA	SIX4	CLUAP1	TEAD1	CIB1	MTF2	SNX11	INO80D	ZSCAN2	PNPLA2	ANKRD11	LIN52	ITK
TRMT10A	RCAN2	SLC2A14	CXorf58	PLIN3	IMPDH1	SLC15A5	USP33	ATP6V0D2	BAG6	CIB1	PBX3	F3	IMPA1	ZNF592	GFM1	SH3BP2	IQSEC1	ITK
B3GNT2	PINK1	SLC2A14	PLEKHA8	CXorf48	GRM7	SLC15A5	DLG5	PIM2	C6orf120	GDPGP1	RIMS2	EREG	PCDH7	ZNF592	FAM65C	KRT71	CS	CYFIP2
RGPD5	DBT	SLC2A14	CHCHD4	AHDC1	FBXW11	MGST1	MAST2	CYSLTR1	CNOT6L	IQGAP1	TAF1D	MRAP	GBP1	ALPK3	GOLGA8H	ZNF628	GPAT4	CYFIP2
ERMP1	GNAI3	SLC2A14	SGCG	MRGPRX2	ABCC5	LMO3	PGM2L1	HOXB2	HOOK1	BLM	EFNB2	MED23	SLC16A7	SLC28A1	LUZP2	ZNF783	ABCC1	NIPAL4
LRFN5	MYO5C	SLC2A3	TBX18	HLF	LRP4	LMO3	ZFAND5	PTPDC1	RAC1	BLM	ZBTB38	CCNE2	HMGCLL1	SLC28A1	FAM150A	EIF2AK1	ADCY7	NIPAL4
SULT4A1	RCC2	SLC2A3	SPOCK3	LUM	ANKRD28	LMO3	RDX	DACT3	SNTB2	FURIN	SYT1	FMN2	SDK1	SLC28A1	INO80D	LHX3	LAIR1	ADAM19
ELOVL6	BCLAF1	C3AR1	SSR3	PANX1	TSC22D1	LMO3	ENDOD1	BTBD3	IKBKB	FURIN	DCAF17	DDRGK1	NOX3	PDE8A	GCLM	NCKIPSD	FBXL12	SOX30
GGH	TAOK3	CLEC4A	CARD8	RGPD5	MTCL1	LMO3	MAP1B	C22orf31	ADCY2	FURIN	PTPN14	ETV3	ASXL3	AKAP13	MKL2	SLC7A8	MEX3A	SOX30
BTRC	IPO9	CLEC4A	VCPKMT	GPR176	THSD7A	LMO3	SLC25A12	PSME4	SLC23A2	MAN2A2	R3HDM2	ALG6	CPPED1	AKAP13	ATP5EP2	KCNE1L	CSPP1	SOX30
ABL2	INA	CLEC4A	RORB	SLC2A1	COL19A1	LMO3	TMEM55B	BTBD1	TENM1	MAN2A2	CPED1	C1QBP	SNX12	AGBL1	RASSF2	WWP2	TSPAN14	C5orf52
EMC1	TMEM133	CLEC4A	PELI2	SYT4	PRR5L	LMO3	FAM179B	FAM133A	CHN2	MAN2A2	KRAS	CKM	ASH2L	AGBL1	COL10A1	ORAI2	SDHD	THG1L
KRT38	ZNF208	FAM90A1	WDR26	HIP1R	MARK3	SDCBP	GOLT1B	SERTAD3	ARL5A	MAN2A2	DUSP7	DSP	CNPY2	AEN	GOLGA8B	MGLL	BDKRB2	LSM11
CDT1	NDFIP2	FAM90A1	CHRNA7	TMEM50A	DLG2	TOX	RAB1A	SPTLC3	BACH2	UNC45A	BMI1	COX7C	GEMIN2	HAPLN3	ART3	ADAM15	PREPL	LSM11
DCDC2	TAPT1	RIMKLB	MPP4	TUBB6	DENND1A	CA8	TTYH3	MESDC1	CREB5	UNC45A	CCNT2	SLC25A12	TMEM33	ABHD2	FOLH1	PMM2	INPP5D	CLINT1
SS18L1	ANKRD36B	RIMKLB	TUBB1	LACE1	TNPO1	RAB2A	LNPEP	NPL	SPAG9	SV2B	CNTN4	RSPRY1	TMEM27	ABHD2	MNT	SYT7	GNAT1	CLINT1
AC022498.1	HNRNPUL1	RIMKLB	GABRB2	C20orf43	ARRDC3	ZSCAN2	CEP170	BAHCC1	MMD2	SV2B	SRF	DUT	SSR1	FANCI	BRMS1L	ITGAX	NPR3	CLINT1
HBP1	RSL1D1	RIMKLB	ZNF721	ERP44	RAG1	ZSCAN2	RNF165	LRRC8A	VTI1A	SV2B	FIGN	TMEM66	RAD1	FANCI	MRPL10	G0S2	RIMS1	CLINT1
EIF4EBP2	KHDC1	RIMKLB	HCRTR1	NXF3	TMEM159	SEC11A	LYSMD2	SERF2	HECTD2	SLCO3A1	RTF1	TKT	TMEM209	FANCI	KCNQ5	ING5	SIPA1L3	CLINT1
WFDC5	ZFY	RIMKLB	YAP1	GNB5	COX7A2L	SEC11A	TGFA	CYP3A7	C16orf52	SLCO3A1	ZNF711	PHLDA1	RSBN1L	FANCI	AC114546.1	OSBPL3	TAB3	CLINT1
ZBTB8B	PAQR3	PHC1	TNFRSF11A	HAUS5	PLCL2	SEC11A	SOCS6	NR0B1	XKR6	CHD2	ATL2	CYP3A7	MKLN1	POLG	ITGB1BP1	ADCK1	KMT2A	CLINT1
GNG7	HECW2	PHC1	KLHL42	POLQ	GADD45A	SEC11A	RBM33	SLC25A24	YWHAB	MCTP2	RSRC2	PLGLB2	AGFG1	POLG	SH3GL3	FAM213B	IP6K1	CLINT1
SEC23A	KCTD8	A2M	ANGPTL5	COL5A1	CCSER2	SEC11A	LRCH1	OAF	MIB1	MCTP2	DIXDC1	MED26	PURB	TICRR	LSM3	FZD1	DIO2	EBF1
CHD2	AK5	PZP	UGT8	AP2B1	ZNF711	SEC11A	MCC	TNFRSF10B	HS3ST3A1	NR2F2	AC068987.1	EXOC4	NAP1L1	TICRR	PARM1	PRIMA1	EVI5	EBF1
CACNA2D3	AGO4	CLEC2D	RAET1L	FMN2	CXCL12	ZNF592	ST8SIA3	AL591684.1	ATP11B	NR2F2	TARDBP	WIF1	ADAM7	TICRR	CREB3L4	AC009237.1	MYRIP	EBF1
HAUS5	BRWD1	CLEC2D	C12orf60	MAP3K4	RBFOX2	ZNF592	MAFB	CLDND1	ST6GALNAC5	NR2F2	RAC1	TBC1D9	GJA5	TICRR	MT1H	HOXA9	NT5DC1	EBF1
CYSLTR1	TYSND1	CLEC2D	TMEM181	SLC45A4	ARFGEF1	SLC28A1	CCDC71L	EDEM3	SERPINI1	NR2F2	PPP1R10	SPATA18	NSRP1	PLIN1	SNX6	SSH1	UFL1	EBF1
MTMR2	TACC1	CLEC2D	RABL2B	ANKRD17	KIF13A	SLC28A1	RAB5A	EFCAB13	DGKA	ARRDC4	DACH1	PRAMEF13	DTNA	PEX11A	SYAP1	ZNF704	CASP8AP2	RNF145
SLC30A1	AKT3	CLEC2D	KCNMB2	RSAD2	SPTY2D1	SLC28A1	HCFC2	ONECUT3	SCRT2	IGF1R	BICC1	ODAM	MIER1	PEX11A	DCAF6	APOBEC3D	ANGPT1	RNF145
MAGEA10	NAPB	CLEC1B	SOX11	TM6SF1	ARHGAP24	PDE8A	UCP3	SWAP70	AEBP2	IGF1R	PTBP1	TPD52L3	TNFAIP6	C15orf38-AP3S2	TTC29	PTCHD1	RASSF1	RNF145
CALCB	DISC1	CLEC1B	YLPM1	ATP5E	TRERF1	PDE8A	DMRT3	SLC25A6	FRMD4A	PGPEP1L	ZMAT3	TUBB6	SOS2	C15orf38-AP3S2	CERKL	RPTOR	SEC14L1	RNF145
BIRC6	HPS3	CLEC1B	KRBA2	RRP1	BLCAP	PDE8A	RNF180	FAM46D	ITM2B	PGPEP1L	VLDLR	FILIP1	FOXN3	AP3S2	EIF2B1	RAB40B	ATP2A2	RNF145
GXYLT1	IFI44	CLEC9A	BMP2K	DHX58	SPIRE1	PDE8A	GAN	EIF5B	TMEM33	PGPEP1L	SLC1A2	MBL2	CMC1	ARPIN	CDKN3	LASP1	PPM1K	RNF145
DSTYK	UBR5	CLEC1A	GABRA2	SDHAF2	GRB10	NTRK3	UNC13A	PRKD3	GOLGA1	SYNM	CBX4	CLIC2	AFTPH	SEMA4B	ATP6V1E2	CBX5	POLR2M	RNF145
TLR5	OCLN	CLEC1A	SLCO2B1	NKX3-2	PRKAA2	NTRK3	HECTD1	AREGB	UBA6	SYNM	SMAD2	CLPSL1	TM2D3	SEMA4B	ABHD5	PRDX2	PLAGL2	RNF145
TBC1D12	ZC3H11A	CLEC1A	CHUK	PRKAG2	UBN2	NTRK3	FAM13B	PKD1	SERINC1	SYNM	KLF9	B3GNT1	ZC3HAV1	IQGAP1	NUDT11	UPF1	NR6A1	IL12B
HNRNPD	TMEM92	CLEC1A	RGS13	KRT3	TOM1L2	NTRK3	ACSL4	CD274	FAM60A	SYNM	HOXA5	CLDND1	GABRA5	IQGAP1	ATP8A1	PARD6G	ARHGAP35	IL12B
ZNF770	HCCS	CLEC1A	RABL2A	TMEM199	PPP2R1B	NTRK3	RALGPS2	COX7C	YOD1	TTC23	KMT2E	CYSLTR1	CALML4	IQGAP1	PAH	AP001619.1	PDLIM3	ADRA1B
ELMOD1	NF1	CLEC1A	EXOC6	CCDC169-SOHLH2	ADGRB3	MRPS11	DCBLD2	ZNF674	LCORL	TTC23	CHD2	PNMA1	RAB6A	BLM	C14orf23	C8orf17	GABRB2	FABP6
DIS3	MAGEA10	TMEM52B	RUNDC3B	NPY1R	HECW2	MRPS11	MYT1	KTI12	RBM12B	LRRC28	CSNK1G3	BBS9	SPTBN1	BLM	CABP5	RCN3	GNAS	CCNJL
SPRYD4	ANKFN1	TMEM52B	CEP57	MANEA	FBXO48	DET1	GABRB2	FOXD1	RAB8B	LRRC28	PDS5B	TAF1D	ADAM28	FURIN	FAM153A	TULP1	CPEB3	CCNJL
GPATCH3	PDE4DIP	KLRD1	NCOA7	C3orf72	GPR158	ISG20	BCAT1	LRRC16A	NFYA	LYSMD4	QKI	POM121C	SFXN1	FURIN	SHCBP1L	SLC16A2	FKBP9	CCNJL
CHML	FGF5	KLRD1	CCDC140	TIRAP	EFR3A	ACAN	NRP1	RPGR	ST3GAL2	LYSMD4	ADCY2	C1RL	PDE10A	FURIN	MPPE1	EPB41	CCNT2	C1QTNF2
ZNF233	TRIM4	KLRD1	SLC25A13	CLDND1	USP47	ACAN	ATXN7L1	LSM12	FAM49B	LYSMD4	RASA2	GMPR2	NCOA7	FES	GALK1	HOXC6	STX1B	C1QTNF2
RP11-89K11.1		KLRD1	GDE1	ZNF80	LRCH2	ABHD2	USP8	GCN1L1	SPRED1	LYSMD4	BRMS1L	SMN2	SEMA3E	FES	C3orf70	BMP6	LRRC14	C1QTNF2
KIAA0895		KLRC1	F8A1	RGPD2	MLEC	ABHD2	USP6	PRPF38B	MXD4	ADAMTS17	DR1	KHSRP	RAD21	FES	DGKH	UNC45A	TBX15	ZBED8
SERPINB1		KLRC1	LRRTM4	MCMDC2	MAP3K14	ABHD2	NFIB	PPP1R18	LATS2	ASB7	CDR2	SETD3	EXTL2	FES	ZBED4	FBXO42	FLRT2	ZBED8
DNAJC9-AS1		STYK1	F8A2	MS4A10	CAST	ABHD2	DEPDC1	IQCK	SLC24A4	ASB7	CDC73	SDK2	PCDHA12	FES	PTGER3	FAM101A	TM4SF18	ZBED8
LMBR1L		STYK1	DNAAF1	FAM107B	LGALSL	ABHD2	TBC1D8	KLF9	KIF13A	ALDH1A3	PIKFYVE	SLC45A4	ASB7	FES	ARV1	2020-09-02	PRKCA	ZBED8
REXO1L1		YBX3	F8A3	DSEL	SERBP1	FANCI	TAF4B	EWSR1	LCA5	CHSY1	GPR107	CCDC80	VAPA	VPS33B	CES5A	C2	ACVR2B	SLU7
ZNF354C		YBX3	ZNF410	PDE4B	USP28	FANCI	TNFSF10	RNF5	WIF1	PCSK6	NPTX1	KCNG3	HNRNPA0	VPS33B	NDP	BTN2A2	LASP1	ATP10B
ARL2BP		TAS2R10	PRR18	C14orf45	UNC13A	FANCI	DAAM1	NCKAP1	HSPA13	PCSK6	GATA2	C1orf145	MYO5B	SV2B	USP10	SDC4	AP2A2	ATP10B
OSBPL8		SMIM10L1	FAM104A	CD2AP	MTMR6	FANCI	DENND4C	IQCD	PLPPR1	PCSK6	CNOT4	RP11-363G10.2	ASAP1	SV2B	GNAS	GALNT6	ENC1	ATP10B
ANKRD12		BCL2L14	GABPA	MRPL9	SPHK2	FANCI	FBXW11	HIP1	ICK	TM2D3	FOXF2	HERPUD1	ARHGAP12	SV2B	PXT1	ANKRD28	MPEG1	ATP10B
DPYD		BCL2L14	ERLEC1	PRICKLE2	SYT1	FANCI	TCF4	IGDCC4	PAN3	LOC102723532	ETV5	TMEM45B	DDX42	SV2B	PLAC9	PHF6	MCM8	GABRB2
ZNF248		LRP6	KLHL31	ZFP91	ITPKB	TICRR	DCUN1D3	BTN2A1	GFI1	SNRNP25	GBX2	RNF111	PIFO	SLCO3A1	PITX3	GPR27	SLC23A2	GABRB2
MBNL1		GPR19	GMFB	UGT8	SPATA2	KIF7	CLTC	CCL15	FAM107B	MPG	SLC24A4	ELMOD1	HMGCS1	SLCO3A1	AOAH	KIAA1958	SLC22A23	GABRA6
EVC		GPRC5D	AL353791.1	KBTBD6	PHF12	PEX11A	SPEN	PNMA1	SLC38A4	NPRL3	DNMT3A	PDLIM5	UBE2V1	ST8SIA2	TTC27	PMP22	WSB1	GABRA1
NAA25		FAM234B	DLX1	PKNOX1	ZFYVE26	PEX11A	HOXC8	MAPK9	KANK2	MRPL28	DLGAP2	EI24	TRMT61B	ST8SIA2	ZNF22	KCTD7	ERGIC1	B4GALNT3
C4orf34		EMP1	RARRES2	BNIP2	SYT6	PEX11A	PRNP	FAM50B	STARD13	MRPL28	ATXN1	YBX1	CHMP1B	CHD2	GOLGA8A	HDAC4	NSUN5	NINJ2
2020-03-08		GRIN2B	RBM25	CCKBR	PRKAG2	PEX11A	EPHA7	CHRNA6	APAF1	DECR2	MED13	RALBP1	LRRTM3	RGMA	CTSK	APAF1	TRPS1	NINJ2
RBM33		GRIN2B	ACSL6	TRAM1	CDS1	C15orf38-AP3S2	ARFGEF1	IFRD2	FSTL1	WDR90	PHTF2	PTPN13	ATXN1	RGMA	DUSP16	CETN3	EIF4G2	NINJ2
SGCG		ATF7IP	ZNF770	TMF1	NR2C2AP	ARPIN	TRIM2	KCNJ15	CPED1	JMJD8	ZNF217	LPL	STXBP5L	MCTP2	SQRDL	C2orf68	RSU1	WNK1
PRKCI		H2AFJ	PRPF39	MYO5B	PAK6	ZNF710	SIRT7	MBNL2	ZBTB5	METRN	ZNF280C	TPK1	IGF2BP1	MCTP2	CDK6	SSH3	ELF4	WNK1
CDC45		WBP11	HGF	UQCRQ	RNF11	ZNF710	VGLL2	MTUS1	FAM219A	CCDC78	RPE	CNTN4	LPP	MCTP2	SLAMF6	PAX4	PTPRD	WNK1
UGT8		MGP	GOLGA6D	KLF9	RPRD1A	CIB1	LBR	SOX15	BRMS1L	RPUSD1	CCNA2	C7orf33	MAP1A	MCTP2	NQO2	FGFR1	CAPZB	WNK1
IL20RA		MGP	ZRSR1	BTD	VPS13D	CIB1	E2F7	ENTPD5	NAP1L5	RPUSD1	NOVA2	MPZL1	WIPF1	NR2F2	FAM208A	KIAA1199	RORB	WNK1
XKR4		ERP27	CDC7	RNF186	CEP55	ZNF774	NHSL1	LTBP1	PFDN4	RPUSD1	ANKH	EYA1	SLC35D3	NR2F2	FAM104A	LAX1	NMNAT2	WNK1
MBL2		ERP27	TRAF3	BTBD7	TES	IQGAP1	DOCK3	DIEXF	MTFR1	RPUSD1	PARD6B	ZNF18	IKBIP	NR2F2	BRD7	FAM82B	ZBTB18	RAD52
KIF11		PDE6H	GOLGA8K	COX7A2L	FOXP1	IQGAP1	TESK2	ETV3	MOB4	CHTF18	NPC1	COL14A1	SMIM15	NR2F2	HIPK2	TTC4	C3orf70	RAD52
FAM133A		RERG	PMP2	ACSL3	ZFAND5	BLM	CCDC144A	LRFN5	AMBRA1	LMF1	FAM60A	OR10V1	PTER	FAM169B	CSNK2B	ZNF208	RNASEL	RAD52
ZNF415		RERG	CXorf22	ZNF681	MSMO1	BLM	DLG2	FAM153B	DENND5A	C1QTNF8	HCFC2	AK7	LRCH1	IGF1R	ADAMTSL5	ACVR1C	RGS7	RAD52
MUC15		RERG	DPY19L4	MAP7D2	TGFBR1	FURIN	TRIM3	ZNF354C	CDKN1B	CCDC154	THRA	NMT2	KMO	IGF1R	GOLGA8N	TMED7	CAMK2B	ERC1
ROBO1		PTPRO	ENPP6	UBR2	SLC25A32	FURIN	KLHDC8A	ZNF177	ATMIN	PTX4	POLK	TRMT10A	PAG1	PGPEP1L	CRYBA1	TRPC5	B3GALT5	ERC1
ODZ3		PTPRO	TNFAIP8L3	DTX4	MEX3D	FURIN	NEDD4L	RSAD2	TRHDE	PTX4	LAMC1	NCKAP1	NUP58	SYNM	ANP32E	CACNG8	PAX6	ERC1
UBD		PTPRO	GOLGA8R	PTPRM	PPP1CB	VPS33B	MAP3K9	CTAGE8	PTP4A1	IFT140	COMMD3-BMI1	NXPH1	SCRN3	SYNM	MT2A	TMBIM6	KAAG1	ERC1
HECW1		PTPRO	FAM60A	EMP1	VMP1	VPS33B	SLC13A2	ELMOD1	GXYLT1	IFT140	KIAA1456	SLC2A1	GABRB2	TTC23	HSDL1	STXBP5L	LPP	ERC1
RABL2B		PTPRO	GPD1L	ISM2	RPA2	VPS33B	KMT2C	RFTN1	XKR8	IFT140	VAT1L	SMG6	ZFAND3	TTC23	C12orf54	AL033381.1	PHACTR2	ERC1
MMD		PTPRO	GOLGA8O	FNBP4	RNF216	VPS33B	FBXO9	IMPG1	BDP1	TMEM204	DOT1L	FBXL8	SSX2IP	TTC23	GJA1	USP47	RC3H1	ERC1
STARD9		PTPRO	MLF1	PRKACB	SESTD1	SLCO3A1	ARHGEF12	DROSHA	RNF5	NUBP2	ZBTB5	ACSL3	FREM2	TTC23	GADD45A	TRMT61A	KIF13B	WNT5B
NFXL1		PTPRO	UBE4B	EPM2A	DLG5	SLCO3A1	STT3B	RP11-830F9.6	KIAA1456	NUBP2	FUT4	TNFRSF11B	PTGER2	LRRC28	FGF13	JMJD1C	ENAH	WNT5B
B3GALT6		PTPRO	CSPP1	PI4K2B	2020-03-02	ST8SIA2	B4GALT5	CNTN4	TWISTNB	RPL3L	CCDC177	IL5	CYTH3	LRRC28	KSR2	FKBP1B	CTTN	ADIPOR2
MPP4		PTPRO	PQLC3	ALG6	SLC8A1	ST8SIA2	LZIC	AC016757.1	FHOD1	NOXO1	NCOA7	RFWD2	CAV1	MEF2A	UNC80	SUPT16H	ACTR1A	CACNA2D4
IL6ST		STRAP	SCGN	LTBP1	ANKRD13C	CHD2	PDE4D	FAM107B	MTSS1L	NOXO1	MATR3	NFX1	MYBL1	MEF2A	TUBGCP4	RASGRF2	ZNF445	LRTM2
TYRP1		SLC15A5	HFE2	NPTX2	TP63	CHD2	QSER1	FLVCR1	CELF1	NOXO1	FOXN2	RGPD1	KIAA0513	MEF2A	CHMP1B	NDRG4	RNF38	LRTM2
C1QBP		SLC15A5	KCNA1	RP11-363G10.2	RASA1	CHD2	RB1CC1	PSMF1	GUCY1A3	NOXO1	PIP4K2B	SLITRK6	KDM6B	MEF2A	CRK	NYAP2	CCDC28A	LRTM2
ZBTB6		MGST1	OCLN	RELN	PXDN	RGMA	SFMBT1	PRDX3	ARHGAP20	ZNF598	LRRTM3	HCFC1	UBE2G1	MEF2A	IKBIP	ODZ4	ESCO2	LRTM2
TNFAIP6		MGST1	INTU	JMY	DCAF8	RGMA	MAP7	RCAN2	NEGR1	SLC9A3R2	SYVN1	MYO1E	CFTR	ADAMTS17	CCT6A	ARRDC4	VMP1	LRTM2
CXCL3		LMO3	ZNF671	RALBP1	TGFA	RGMA	EGR3	CTAGE9	BTF3L4	SLC9A3R2	GALNT2	ARHGEF18	IL6ST	ADAMTS17	PMFBP1	ZNF618	NDRG4	LRTM2
C17orf47		LMO3	DTNA	STK11IP	TMEM55B	MCTP2	RAB34	NR2F2	SOX1	TSC2	PIK3CB	CREBBP	CPLX2	CERS3	C5	NHS	ADCY9	CACNA1C
FMO3		LMO3	MCOLN2	BRI3BP	FYCO1	MCTP2	ERBB3	TAF1D	STYX	TSC2	CYP1B1	SRGAP3	TRERF1	CERS3	CLDN2	KLF7	MBD5	CACNA1C
NFYB		SDCBP	FGF19	IQCK	KDM2B	NR2F2	RASSF3	SKOR1	DIXDC1	TSC2	MYZAP	ARPC3	DCAF6	CERS3	HNMT	IRAK3	SH3PXD2A	DCP1B
NUDT4		SDCBP	TTC39C	ULK3	HCFC2	NR2F2	AFF3	HMX3	RNF19A	TSC2	EIF2B5	SRGN	MEF2C	CERS3	RRM2B	LINS	AHNAK2	DCP1B
RBM12B		SDCBP	ZNF569	CLEC10A	SLC25A44	NR2F2	ZNF451	ANKRD62	BHLHE41	TSC2	WDR45B	LPAR3	PCDHA13	ALDH1A3	SCARF1	C5orf51	TPMT	CACNA1C
CA2		SDCBP	GOLGA8H	WDR59	SOX21	NR2F2	SASH1	IL4	CDC73	TSC2	DCUN1D1	MMP3	CCDC25	ALDH1A3	RP11-382J12.1	PAICS	GPD2	CACNA1C
NAMPTL		NSMAF	NAMPT	KAL1	UBAP2L	NR2F2	PPFIA2	TMEM178A	ELAVL4	PKD1	ZNF697	NFXL1	WDR20	LRRK1	IFNK	CUL3	SERTAD2	CACNA1C
PDS5A		NSMAF	HSD17B13	FBXW4	SIX4	ARRDC4	SZRD1	CHRNA5	PRTG	PKD1	KCND2	KAL1	FBXO40	SNRPA1	ARL2	TNS1	PKNOX2	CACNA1C
COPS6		TOX	CDO1	RINL	MAML3	IGF1R	PPP1R9A	TREML4	CCDC82	TRAF7	WWC3	MBD3L1	ANO3	TARSL2	GOLGA8M	EPHA2	CR1	CACNA1C
GTPBP4		TOX	DPPA4	NFAT5	MAP1B	IGF1R	ITPKB	ALG6	TCAIM	TRAF7	CDYL2	PLEKHA5	ASB14	RGS11	VEZT	C1orf116	SEMA5A	CACNA1C
P4HA2		CA8	GOLGA8N	PAFAH1B2	MAP4	TTC23	NHSL2	RBMXL2	CBL	CASKIN1	GLIPR2	SPCS2	ZEB2	RGS11	GPR137C	PAX5	CDH13	CACNA1C
B4GALT6		RAB2A	TTBK2	CHRNA5	RAB5B	TTC23	ACER2	FRMD4A	PPP2CA	E4F1	PHF21A	IQCK	VCPIP1	RGS11	SEPT9	ZNF841	ARRDC3	CACNA1C
C8orf12		WDR73	ZNF705D	CYBRD1	SNPH	TTC23	BPTF	MINA	TBC1D15	E4F1	PAG1	STBD1	TMPO	RGS11	FMR1NB	PRKCA	AGO4	CACNA1C
JMY		WDR73	ZNF705B	CDC14B	EPB41L5	LRRC28	SNPH	ARMC10	THSD7A	ECI1	TBP	ZNF91	SLC25A44	RGS11	ZNF772	TPMT	PEG10	CACNA1C
DICER1		SEC11A	GPATCH3	TMEM133	PLEKHF2	MEF2A	SIK1	ARIH2	DENND5B	ECI1	PVRL4	BBS2	PTPRB	NME4	ATP6V1G3	CBR4	HIPK2	CACNA1C
EMP1		ZNF592	DAPP1	AC022532.1	BMP3	MEF2A	ROBO2	ERMP1	INPP4A	RNPS1	ZC3H15	DROSHA	MYCL	PIGQ	RSF1	EIF5A2	CTNS	CACNA1C
SCARB2		ZNF592	TMEM30B	TTBK2	MOB3B	LYSMD4	RASGRF2	TBL1X	NCS1	RNPS1	UNC119B	TCEA1	PIK3CG	PIGQ	FKTN	EML5	UBR4	CACNA1C
GFM2		ZNF592	UBR1	ATXN1L	NUP133	LYSMD4	ROCK2	CDT1	ARL8B	RNPS1	CDR2L	CNTN2	ZNF641	MCRIP2	NPM3	SUPT7L	IKZF1	CACNA1C
SETD3		ZNF592	PRKAA1	CHIC1	INSIG1	LYSMD4	ZEB2	ARL2BP	RSRC2	RNPS1	NEK9	CPEB3	ZKSCAN1	WDR90	HS6ST2	TNFRSF10D	EYA1	CACNA1C
IPO9		ZNF592	HNRNPC	SCD	AAK1	LYSMD4	NDEL1	C1orf52	ZNF652	RNPS1	NRBF2	PHB	SERPINA5	JMJD8	LHX8	KIF13B	MEX3D	CACNA1C
TMOD2		ZNF592	SAMD12	TGFB1I1	ARPP19	ADAMTS17	GPATCH8	RAB3C	PALM2-AKAP2	RNPS1	CAMSAP2	C3orf62	ADAM22	WDR24	BCL7B	DDX56	RNF144A	CACNA1C
SNTB2		ALPK3	CCND2	FYCO1	PXYLP1	ADAMTS17	ARRDC3	SPTLC1	ARHGEF17	ABCA3	TMEM178A	DNAH5	MDM4	WDR24	BTC	SP9	PRDM8	CACNA1C
CHRM3		ALPK3	GUCA2A	CHML	CDKN1A	LINS1	CAV2	PLA2R1	AFF4	TBC1D24	TRIM62	IL26	TNRC6A	CCDC78	DYNC2H1	FOXD2	GCOM1	CACNA1C
EPM2A		SLC28A1	CREBRF	TCEA1	MTMR12	ASB7	ZNF804B	TMEM87B	SLC39A14	TBC1D24	UGCG	ZNF142	CEP192	CHTF18	LHCGR	TCEANC2	GSE1	CACNA1C
MLLT4		PDE8A	CD53	MRS2	KLHL3	ASB7	NDRG2	RNF166	KCNQ4	TBC1D24	INHBA	NEDD9	CNOT4	CHTF18	RWDD3	TP53TG3	PEX10	CACNA1C
TTBK2		PDE8A	EVX1	SPARCL1	NAA15	LRRK1	AJAP1	BLOC1S6	PCDH19	TBC1D24	SPAST	ACACA	SLC23A2	SOX8	RNF146	QKI	PSD3	CACNA1C
TRHDE		PDE8A	SRP68	CNTN4	NSD2	LRRK1	FAXC	TBX5	SMARCD1	TBC1D24	ST6GALNAC5	ONECUT3	AP1G1	UBE2I	CTSV	SEMA6A	TACC1	CACNA1C
KBTBD6		AKAP13	PDIK1L	CALN1	UBA3	CHSY1	JHDM1D	ZDBF2	DNAJC3	TBC1D24	PHLDB1	DNAJC8	SLC5A12	UNKL	UBE2W	SSX2B	CLEC16A	CACNA1C
SLC5A3		AKAP13	C9orf72	POU6F1	DIP2A	CHSY1	ING1	PRKAG2	SLC16A2	AMDHD2	TUBB3	ART3	SCARF1	CRAMP1	ZNF175	MYH11	CETN3	CACNA1C
DOK6		AKAP13	GOLGA8I	TNPO1	ZNF609	PCSK6	TNRC6A	GNB5	FAM76B	AMDHD2	VASH1	C1orf192	TXNDC16	NME3	C19orf69	GLCE	ZDHHC5	CACNA1C
PGAP1		AKAP13	TMEM154	GABBR1	DIAPH3	PCSK6	SATB2	THRB	YWHAQ	AMDHD2	CECR2	ARHGAP40	CAP2	NUBP2	LAMP5	SERTAD4-AS1	DDX6	CACNA1C
GPR180		AKAP13	BPHL	CYSLTR2	MFF	TM2D3	ANKRD28	SIRPA	IGSF3	AMDHD2	PPP2R2C	ARHGAP11A	METTL4	NUBP2	TMEM209	AQP4	TBC1D30	CACNA1C
PLCXD3		AKAP13	C1orf174	CDKL2	MMD	TM2D3	VSIG10	SORT1	SNAI2	AMDHD2	ARRDC3	SULT4A1	RBM19	HAGH	MMP16	ZNF526	NFIL3	CACNA1C
EIF3F		AKAP13	COPS8	BIRC6	C18orf25	OR4F6	B4GALNT3	IL7R	BICD2	AMDHD2	PTP4A1	MAP2K6	METTL8	FAHD1	TMEM194A	KCNK5	SSX4B	CACNA1C
CA12		AGBL1	BOLL	CYS1	SLC39A10	LOC102723532	MED12L	DSTYK	MBD5	AMDHD2	GABPA	ZNF14	FKTN	TRAF7	KDELC2	AP006621.5	HIF1A	CACNA1C
RRP15		MRPS11	ZNF705A	MRAS	ITSN2	LOC102723532	KATNBL1	CDH11	MMP16	CEMP1	TBC1D22B	CXCL2	FAM214A	PGP	LRMP	SEC24B	ZADH2	CACNA1C
TSHZ2		MRPS11	C2orf47	PPP1R3B	ELAVL2	RHBDF1	SNX27	PPM1H	TMEM170B	CEMP1	CTNND2	KIAA0528	TRAPPC8	PGP	ZNF717	UCP3	ANKRD49	CACNA1C
EIF2C1		MRPS11	SLC4A1AP	MBL2	ITGB8	LUC7L	CSNK1G1	POLI	PPM1B	CEMP1	YWHAQ	MCCC2	CREBBP	RNPS1	MS4A1	INSIG1	QKI	CACNA1C
TMEM63C		MRPS11	ZNRF3	TBL1X	LIPA	FAM234A	PLCB1	RNF186	HOXA5	PDPK1	ZYG11B	KLHL22	DUSP16	RNPS1	C2orf47	RAB7A	RREB1	CACNA1C
UBE2V2		AEN	GOLGA8G	SELL	ABCB7	FAM234A	PELI1	ACACA	GMFB	PDPK1	TLN2	IBA57	NHS	RNPS1	FTSJ2	SLC1A2	SLCO4C1	CACNA1C
PCNX		AEN	ZNF705G	CREM	REEP1	ARHGDIG	ITPRIPL2	CTSS	NOTCH1	PDPK1	WBP1L	CNKSR2	ZNF664	RNPS1	DPF3	TLX1	LRFN1	CACNA1C
MKLN1		ACAN	CNPY1	GABARAPL3	CDADC1	PDIA2	ITFG3	ZNF182	LCOR	SRRM2	TTC5	MBNL2	TMEM52B	RNPS1	RPL31	SLCO4C1	UPF1	CACNA1C
CNR2		ACAN	CXorf56	PHAX	PRKACB	MRPL28	GPR158	FOXL2	CASC4	PAQR4	PRDM1	GATM	VANGL1	ABCA3	RAB11FIP2	STAT6	ACP1	CACNA1C
GATAD2B		ABHD2	PTGFR	PKHD1	PHAX	MRPL28	CRISPLD1	ZNF738	HNRNPH1	PAQR4	NCOA3	SUPT3H	C12orf4	ABCA3	PLAC1L	TYW5	LPGAT1	FKBP4
NDST3		ABHD2	SS18L1	MLL4	PDIA3	MRPL28	AGO1	KCMF1	PHLDB1	PAQR4	THSD7A	BORA	TET1	CCNF	KIAA0040	SLC4A11	RBFA	ITFG2
SAMD8		FANCI	AFF4	POLA1	NUS1	DECR2	ENPP4	ZFHX4	PPP1CB	PAQR4	GABBR2	SUDS3	SECISBP2L	TBC1D24	EIF3D	RAB31	STARD3	ITFG2
PPP2R5E		FANCI	ROBO1	EFR3A	LIN28A	RAB40C	IKZF4	ATXN1L	TTC33	PAQR4	N4BP2	ZBED2	RAB11FIP2	TBC1D24	DNTT	SPRED2	UNC5A	NRIP2
VTI1A		FANCI	ZC3H15	DPYD	SRSF7	RAB40C	ZFP91	RALBP1	TLL2	PAQR4	ELK3	NCOR1	KIAA0907	PDPK1	IGJ	ZNF805	MET	FOXM1
CTD-2192J16.17		FANCI	BORA	COMMD6	AKAP11	RAB40C	KLHL21	AHR	PTCH1	PAQR4	PIP4K2A	CTTNBP2NL	XPO1	PDPK1	FMO3	PDZD4	CDC42BPA	FOXM1
TET2		FANCI	CLEC3A	NTSR1	CAND1	RAB40C	STX7	GEN1	PTEN	ORC2	SPAG9	CBWD7	RCN2	PDPK1	ALG10B	ELFN2	ADGRL3	RHNO1
CPEB4		POLG	ARHGEF3	SLC24A3	DYRK2	RAB40C	TMOD3	C11orf58	JKAMP	FAM126B	GPR173	RHOXF2B	LEPROT	PDPK1	ACSM3	MPEG1	TMSB4X	RHNO1
GREM2		POLG	AC005481.5	AP3M1	PRUNE2	RHOT2	PRICKLE2	DR1	ACVR2A	FAM126B	ANKRD28	MMD	FAM19A1	PDPK1	GPC4	RAB27B	C3orf18	RHNO1
CASP2		POLG	SATB1	HOXB3	JCAD	RHBDL1	USP44	NXPH1	ORMDL3	CFLAR	TRHDE	KAT6B	TMC7	PDPK1	EPS15	CAMTA1	TNIK	RHNO1
KIAA0754		RHCG	AGPAT5	MDFIC	UBXN2B	STUB1	TGOLN2	ANKRD26	RNF11	CASP8	ARID4A	KRTAP21-2	PRNP	KCTD5	LPP	SUFU	DCHS1	RHNO1
SESTD1		RHCG	LMBR1L	ARFGAP1	HS3ST5	LMF1	NCOA3	PTPN13	KRAS	CASP8	GOLGA1	POT1	SMCHD1	SRRM2	KIAA1143	CLDN23	SRGAP3	RHNO1
PDE4D		TICRR	ITGAX	PWWP2A	TROVE2	LMF1	STC1	POLQ	GLCCI1	CASP8	AFF3	ZNF724P	GPR137C	PRSS22	GPC5	KCNK3	SKI	RHNO1
KIF6		TICRR	RSBN1	SUDS3	RNF2	C1QTNF8	PIK3C2A	PWWP2A	SRP72	CASP8	RIPK2	MOXD1	DEPDC1B	CFLAR	EPCAM	ZBTB45	FAM102A	RHNO1
MYO5A		TICRR	ATG12	SESN2	LTBP1	CACNA1H	STOX2	GATC	ZNF655	CASP8	PEAK1	TBKBP1	ADCY9	CFLAR	APOBEC3G	SH3PXD2A	SLC6A12	RHNO1
SCAND1		TICRR	PHLDB2	DOK6	CEP120	BAIAP3	PRUNE2	MRPS35	NEDD4L	CASP8	GPATCH8	PUS10	GPRIN3	CFLAR	SOX2	RBM38	PHIP	TULP3
TNRC6B		ANPEP	TMEM26	SLC25A12	SAR1B	BAIAP3	RARB	B3GNT2	PDPK1	CASP8	HOOK1	RCAN1	TIA1	CFLAR	SLC35F4	ZNRF3	SIX4	TULP3
ARID2		C15orf38-AP3S2	SUV39H2	COL10A1	TNRC6B	CLCN7	MARCH2	GUCY1B3	HNF1B	ALS2CR12	REEP1	SV2A	TSHZ1	CFLAR	FAM198B	ARHGAP33	PRKAA1	TULP3
TBCK		AP3S2	BEST3	ST8SIA4	MIGA2	CRAMP1	R3HDM1	CCER1	NUP160	ALS2CR12	GLCCI1	ZNF543	FAM35A	CFLAR	C11orf73	MAP2K7	LMAN1L	TULP3
PDDC1		ARPIN	USP42	ACACA	NAP1L3	MAPK8IP3	NME7	UTY	PHF21A	ALS2CR12	WDR82	ABCB1	RGPD5	CFLAR	MARC2	ZNF503-AS2	PPM1F	TEAD4
GIPC3		ARPIN	PRNT	SUV39H1	HOXD1	MAPK8IP3	ANKFY1	SLC2A10	PBX3	STRADB	NEK10	RP11-1118M6.1	ZNF280D	CASP10	UHRF1BP1L	ZNF589	MAPKBP1	TEAD4
GABPB2		ZNF710	PLS3	ZFP90	SERTAD2	RPS2	SLC4A5	DOT1L	TTC5	STRADB	ZFAND5	RCL1	PAH	CASP10	COG2	LPP	RBM24	TEAD4
EMP2		IDH2	MBP	ZNF709	TACC2	NOXO1	IKZF5	PLIN3	HNRNPK	C2CD6	CACNA1C	ZCCHC9	ZBTB18	CASP10	PCNP	DRD2	LYN	TEAD4
ADIPOQ		IDH2	GSPT1	DCDC2	LRRTM2	NOXO1	SLC9A2	UNC50	PIN1	TMEM237	C10orf118	KIAA1432	CWC27	CASP10	C1orf192	ARNT2	CCDC97	TEAD4
SPTLC2		GDPGP1	COL13A1	TSG101	WTAP	NOXO1	CDH20	PFKFB2	CNTFR	ALS2	PDPK1	PLD1	RXRB	CASP8	DONSON	KLF13	MAEA	TSPAN9
B3GALTL		NGRN	SEP15	POU4F1	CCNY	NOXO1	ATG4D	PRKCI	BCLAF3	ALS2	SBSPON	HLTF	ZFP41	CASP8	TMEM99	PCBP3	HELZ	TSPAN9
CDS1		NGRN	EMC1	CDKN2AIPNL	WNK3	TSC2	SLC25A46	FNBP4	CCNT2	ALS2	PPP1R9B	RNF133	SEMA6D	CASP8	ASPH	ST7	GRM6	CRACR2A
WDR72		CRTC3	ZNF329	PRKD3	HEG1	TSC2	HECA	C7orf60	SLF2	ALS2	ATP11C	FAXC	JRKL	CASP8	ARL1	HOXB13	NFIA	CRACR2A
AGPAT4		CRTC3	OR12D3	KIF14	EGLN3	TSC2	LRP2	SLC8A3	TBL1XR1	KIAA2012	CHST2	ZSWIM7	OSBPL3	CASP8	TBC1D3F	SSR1	LZTFL1	PARP11
SCN4B		CRTC3	RPS6KC1	MUC15	ATP2A2	TSC2	SPIRE1	DTNA	SSFA2	KIAA2012	CLIP1	FAM167A	AQP4	CASP8	P2RY13	GTPBP5	CAD	PARP11
BAIAP2L1		CRTC3	KRIT1	PLEKHF2	YWHAB	TSC2	MLEC	KIF11	TUBB	FAM117B	PPFIBP1	MS4A14	HMGA2	ALS2CR12	CPED1	THY1	FOXP3	PARP11
ENPP1		BLM	TTC1	MYOCD	LRP1B	TSC2	MAML3	IPO9	SOCS6	ICA1L	STARD13	C1orf210	PPM1A	ALS2CR12	MAP10	ADAMTS15	KDM3B	PARP11
KLHDC5		BLM	SIK2	RHD	DGKE	RAB26	PDGFRA	NDN	FOXF2	ICA1L	ZMYM4	TMEM38B	OSBP	ALS2CR12	UAP1	TMEM102	RBM33	PARP11
GDF11		FURIN	CCL5	BTBD3	SLC24A3	TRAF7	TMEM236	MORC3	MXD3	ICA1L	XIAP	WTAP	DUS4L	ALS2CR12	LRRC19	FBXO41	PRMT2	PARP11
IGFBP5		FURIN	TENM3	KIAA1191	ZCCHC2	CASKIN1	TMEM236	XRN2	INTS6L	CYP20A1	MOB4	ARAP2	DOK6	TRAK2	UBE2V1	CACNG7	RNF220	CCND2
PAG1		FURIN	ABCA8	ZNF333	BIRC6	MLST8	KLF6	RSPRY1	FNBP4	ABI2	UBQLN1	HBP1	MORC3	STRADB	PATE4	PLEKHM1	TENM4	CCND2
EMR2		FURIN	SMURF2	KLRD1	ACVR2A	MLST8	PHACTR2	TMEM38B	NFASC	ABI2	FAM19A5	EDC3	RIMS1	STRADB	IQCB1	ZIC4	WDR20	CCND2
C2orf71		MAN2A2	THAP8	TNFRSF10B	SLC35D1	MLST8	STAT3	F2RL1	TMEM178A	ABI2	ACTR3	VRK1	ZNF577	C2CD6	PEX5L	BACH2	ZNF805	TIGAR
ADAMTS6		MAN2A2	SPATS2L	ANKRD12	FAM19A1	CCNF	NCKIPSD	EPOR	ZFHX4	ABI2	SDK2	ATP11A	NAV2	C2CD6	INMT	NKD1	FBXO28	TIGAR
NUP155		MAN2A2	TNFSF18	TP63	KIAA1211	TBC1D24	GGA1	LYPLAL1	ATRX	RAPH1	PCSK5	KRT38	ZNF148	C2CD6	SLC30A8	GLIS1	SPTBN1	FGF23
TMEM127		MAN2A2	CNIH3	KIAA1244	RBM24	TBC1D24	MIER3	SNX16	KCTD15	RAPH1	CASD1	MGAT2	AP4E1	C2CD6	TBC1D3	IQCE	KIF1A	C12orf4
PGR		UNC45A	RFC3	LYSMD2	EGR3	SRRM2	CCND3	NT5DC4	NAPB	CD28	FERMT2	LRRK1	CXCL11	TMEM237	DNAJC19	CELF3	SPIRE1	C12orf4
RP11-111M22.2		UNC45A	NREP	AC005754.1	STX12	ELOB	HSPA8	CDC42EP3	ARHGEF3	CD28	C7orf43	APOBEC3G	RALGAPA1	TMEM237	AL357673.1	KDELR2	ARHGAP19	RAD51AP1
ZNF285		UNC45A	LRRC58	NEDD4L	FUT9	FLYWCH1	E2F2	FAM118B	SNX30	CD28	APAF1	CAPN6	NECTIN4	MPP4	NMNAT2	CD93	SH2B3	RAD51AP1
TTC9		UNC45A	FSD1L	PDS5A	FIBIN	FLYWCH1	DLC1	CHML	GLIS2	PARD3B	SMAD9	GDI2	SORBS1	ALS2	AGAP7	KIAA1644	SLC39A10	DYRK4
TP53INP2		PRC1	MACROD2	SDR42E1	PPP1R12A	PAQR4	ITGB8	TMCC1	WWC3	PARD3B	HIPK1	RBMY1D	LTN1	ALS2	ESAM	SH3GLB2	TNRC6C	DYRK4
GNG12		PRC1	SYT5	FAM46C	TRPC3	PAQR4	DIP2C	COL9A2	ARID4A	PARD3B	KCND3	KIF14	CALD1	ALS2	TECRL	LIMK1	KIAA1522	AKAP3
SSTR3		PRC1	RP2	ROBO1	SLC35F3	PAQR4	LMTK2	SYDE2	PHACTR2	PARD3B	OXR1	NQO2	STK38L	CDK15	LECT1	SLC52A2	CEP170B	AKAP3
KPNA1		SLCO3A1	SLC46A3	RTN4	IL15	PKMYT1	HOXA5	CDR2L	PLPPR4	PARD3B	FBXO22	CLUAP1	THOC2	CDK15	SMIM12	MED29	TSPAN10	AKAP3
SIAE		ST8SIA2	FAM83D	CALM2	RARB	PKMYT1	PHACTR4	YES1	SPAST	PARD3B	EGR3	MAGED1	C6orf62	CDK15	LYPLAL1	U2AF2	HECTD2	AKAP3
ATP5G3		ST8SIA2	MXRA5	AHR	SRPX	CFLAR	AAK1	SIAH1	COX11	PARD3B	DOCK4	RBMY1F	SLC38A2	CDK15	ZNF556	NFATC2IP	MITF	AKAP3
CORO2A		CHD2	ZNF208	FBXO7	MUM1L1	CFLAR	FYCO1	CDC14B	FBXO22	PARD3B	MAP3K1	GRINA	FAM171A1	CDK15	DIRC1	CDCP1	RPE65	NDUFA9
C17orf105		CHD2	IGF2BP3	TEK	MTMR4	CFLAR	ABCA1	CRYZ	PAG1	PARD3B	DLC1	C5AR1	NPAT	SUMO1	C8orf58	GFRA2	HOXA5	GALNT8
TMX4		RGMA	RAD51AP1	NRARP	OTX2	CFLAR	ADAMTS18	TBC1D12	MAP3K5	INO80D	MARCH8	FAM60A	PEX5	BMPR2	MTX3	RAB11B	UNC45A	GALNT8
RTP1		RGMA	KMO	RNF24	LBR	CFLAR	UHRF2	NOTCH1	WBP1L	NDUFS1	CASR	GRPEL2	GPC5	BMPR2	DNAJC21	ABI2	SF3B1	KCNA6
APEX2		RGMA	HFE	PDCD1LG2	IGFBP5	CFLAR	TSPAN18	JAZF1	CTBP2	NDUFS1	PAK6	DKK3	IFT57	FAM117B	MEI1	CA7	ATF7IP	KCNA6
SREBF1		RGMA	FMR1	PGRMC2	MAP4K4	CFLAR	EPC1	MPP4	PROK2	NDUFS1	WASF1	ARL4A	TRDMT1	FAM117B	ARHGAP19	LPIN2	UBE2G1	KCNA1
TTC5		NR2F2	KCTD3	SYDE2	AFF1	CFLAR	MUM1L1	SNX30	PENK	NDUFS1	KIAA1462	MEP1B	KIF1B	ICA1L	PSMA8	KIAA1755	ZMIZ2	KCNA1
ZNF441		NR2F2	ARRDC3	ENDOD1	ZMAT3	CFLAR	VCPIP1	MGAT2	PPP1R18	NDUFS1	ZIC3	TSSC1	TRIM2	ICA1L	BRS3	EXOC3	TJP1	KCNA5
HUWE1		IGF1R	ANGPTL7	FAM19A1	RLIM	CFLAR	LRP4	LIMA1	RIPK2	ZDBF2	KANK2	HDHD2	WDR37	ICA1L	GNPNAT1	THRAP3	ATN1	ANO2
LTBP2		IGF1R	AC011294.3	HADHA	ATXN7L1	CFLAR	CMPK2	NPY1R	AMMECR1L	ZDBF2	LPIN1	FMO3	TSC22D1	ICA1L	METTL10	THBS2	IQCE	ANO2
DCAF5		IGF1R	PABPC4L	KLHDC7A	VCPIP1	CFLAR	NIPA2	UFM1	MGA	ADAM23	SOX5	DR1	FAM122B	CARF	RALGPS2	ASXL3	WIPI2	ANO2
RAD18		IGF1R	ANXA5	ATRAID	RALGPS1	CFLAR	ETV3	ATP11A	STAM2	FASTKD2	SCN3B	DSEL	ERBB4	CARF	MAD2L1	MYL2	TMEM105	ANO2
SEMA3A		SYNM	SLC30A5	VPS13D	KATNBL1	CFLAR	CADM2	CCDC109B	ARHGDIA	FASTKD2	CHSY1	PTPN20B	FAM199X	CARF	NTRK2	EMILIN2	OXTR	VWF
DERL2		SYNM	CNR1	C1orf145	RBM33	CFLAR	PDE3B	GLI3	RNF38	FASTKD2	ARL14EPL	CCL28	USH2A	CARF	CTPS2	HAUS3	CREB3L3	VWF
SOX6		TTC23	CLHC1	AC114772.1	SNAPIN	CFLAR	SOWAHB	HDHD2	DNMT3B	KLF7	SHC1	LYPLAL1	DPY19L3	NBEAL1	DDX5	PLEKHM2	NFATC1	CD9
ZNF576		TTC23	PRKACB	ZC3HAV1L	KLF4	CFLAR	PXDN	CHAC2	KATNAL1	KLF7	ARHGEF17	NPY1R	ALG5	NBEAL1	KLK11	ADAT3	RNF212	CD9
DRAXIN		TTC23	RALA	DUT	HLF	CFLAR	ATG2B	ANP32B	CGGBP1	KLF7	CASZ1	KCNA4	CPD	CYP20A1	METTL21A	TPST1	ADAM15	CD9
SMPD3		TTC23	VBP1	SEL1L3	ATRN	CFLAR	CHD5	WWC2	STX16	KLF7	FGD1	OLFM3	FBXO8	CYP20A1	CCDC126	ZNF629	KIF20A	CD9
MLEC		TTC23	TMEM133	CPEB3	FAM20B	CFLAR	VPS37B	NPR3	ABAT	KLF7	TBX5	HOXB2	ENOX2	RAPH1	GDPD1	CORO1C	MECOM	TNFRSF1A
CSF2RB		LRRC28	C3orf80	CENPO	ENAH	CFLAR	SOX21	CCNE2	KMT2C	CREB1	C6orf62	FLG2	ARPP21	RAPH1	TMEM50B	CDC16	OLIG3	TNFRSF1A
MFHAS1		LRRC28	CYSLTR1	CYLD	EBF3	CASP10	RASSF2	ATP5B	ZC3H4	CREB1	SCN1A	PANX1	HNRNPR	RAPH1	AKR1D1	POGZ	SUSD4	SCNN1A
PSG4		LRRC28	TSHZ2	ATXN7L1	FOSL1	CASP10	ST3GAL3	BTBD7	LEPROTL1	METTL21A	DESI1	SPACA1	C5orf30	RAPH1	SLC22A16	FAM23B	TLX3	SCNN1A
CELF2		MEF2A	ANP32E	PAX6	BCL11A	CASP10	ZBTB16	GABRA6	UBE2V1	METTL21A	SLC4A7	GSX2	CLIP4	RAPH1	NTN4	KIAA0319	HOXA3	SCNN1A
SEMA3D		MEF2A	PTPN1	SRSF2	SLC25A12	CASP10	UGT8	B3GNT1	STRN	CCNYL1	STRN3	LAMTOR3	FRAT1	RAPH1	STRADB	CDK9	JMJD1C	SCNN1A
FOSB		MEF2A	PPAPDC2	FAM110C	ZDHHC23	CASP10	CASD1	DCAF13	SPART	CCNYL1	HSPE1-MOB4	CAMK2B	LDB3	CD28	ZNF112	HCAR1	ZNF710	LTBR
TECRL		MEF2A	PRR14L	GINS4	TAF4B	CASP10	TET3	GOT1	LRIG1	CCNYL1	CNST	CORO6	CHD7	CD28	FAT4	KCNQ4	SOCS1	LTBR
SUSD4		MEF2A	ZNF662	RBM17	RASD1	CASP10	XPO4	MBIP	NSD2	FZD5	ZNF236	PDE8B	PTP4A1	CD28	BCAT2	OTUB2	HOXC6	LTBR
MAP9		LYSMD4	KIAA1715	KIAA0528	PDE4B	CASP8	KLF11	TNFRSF11B	ACTR3	PLEKHM3	RBM26	OLIG3	SPIN4	CTLA4	CEP350	TAB1	UBQLN2	TAPBPL
SLC22A23		LYSMD4	TBX3	SOX4	TMSB4X	CASP8	KLF13	PLOD2	PISD	PLEKHM3	CHN2	NLRP2	COL10A1	CTLA4	C19orf12	KIF3A	ZNF644	VAMP1
FRS2		LYSMD4	RCBTB1	TMEM159	DNM2	CASP8	PI4KA	IAH1	RIMS2	PLEKHM3	GFI1	POLR2F	PHF14	CTLA4	AMER2	C1orf111	RPP14	VAMP1
VPS35		LYSMD4	PLEKHB1	KCNA4	TPP1	CASP8	RNF2	SCN8A	MBNL3	PLEKHM3	FYN	TMEM50A	TCF4	PARD3B	ERGIC2	ANKS1A	TMEM52B	VAMP1
SMARCE1		LYSMD4	PHF11	RPRD1A	C6orf62	CASP8	ZDHHC2	WIF1	UBE2R2	PLEKHM3	WDFY3	SLC35G2	TMEM64	PARD3B	C5orf54	PHF19	CLOCK	VAMP1
SLCO2B1		ADAMTS17	PEX19	CASP8	SGCB	ALS2CR12	TSPYL2	DIS3	RAB7A	CRYGC	ERG	ZNF318	CDK12	PARD3B	LSM11	TMEM35	SCRT1	VAMP1
LIN52		ADAMTS17	GOLGA8F	SMARCD2	ATG4D	ALS2CR12	IL1RAP	XKR4	CEBPD	CRYGA	SH3GL1	C17orf78	RYBP	PARD3B	C3orf67	TACSTD2	PPARGC1A	VAMP1
HOOK2		CERS3	LANCL1	MAST2	PDE4D	ALS2CR12	GRIK2	VCPIP1	AKAP2	IDH1	ARHGAP20	COX7B	ITCH	PARD3B	CCRL2	ATAD3C	MAPK14	NCAPD2
MAP2K1		CERS3	SERBP1	F3	ENDOD1	TRAK2	DIP2A	MTERFD1	C21orf91	MAP2	CACNA2D1	ZNF248	MTURN	PARD3B	MAP3K4	ZNF155	MYO5A	GAPDH
HSPA12A		CERS3	FAM115A	G3BP1	ETNK1	STRADB	ZDHHC23	TTBK2	CYTH1	MAP2	ULK2	EXOC1	SLC1A2	PARD3B	SPACA4	RHOF	CCT3	GAPDH
STEAP2		CERS3	TMA16	RAB3IP	CDV3	STRADB	FAM178A	HNRNPD	HNRNPH2	MAP2	PTCH1	ZC3H6	CACNB4	PARD3B	PGLYRP4	DYRK2	KCNC4	GAPDH
TNS4		ASB7	GAN	PSAP	RAB9B	C2CD6	BRWD3	SDK2	MTUS1	MAP2	CHD1	WDR76	RPRD1B	PARD3B	ZNF688	CAPZB	LRRC58	GAPDH
MPHOSPH9		ASB7	ST6GAL2	CHD9	MAPRE1	C2CD6	PROX1	FAM84A	ETF1	MAP2	PAK7	TLR5	KLK10	NRP2	AGAP8	C11orf45	MGLL	IFFO1
HECW2		LRRK1	ZBTB44	CRISPLD1	SETD7	C2CD6	CANX	POU6F1	PRKCA	UNC80	SMURF2	AL591684.1	PPM1D	NRP2	UBE2G2	GAK	ATXN1	IFFO1
SLC17A7		LRRK1	RIMKLB	UGT2B11	LMLN	C2CD6	GPC6	PAX6	PIP4K2B	UNC80	CNOT6	SLC52A1	PLEKHH1	NRP2	ZBTB41	GLT6D1	SMARCA4	NOP2
ZBTB43		LRRK1	DOCK1	PGM5	F3	C2CD6	ZDHHC14	ANKRD46	CNKSR3	KANSL1L	TP53INP1	SERPINB1	YWHAE	NRP2	NLGN1	ZFP36L1	ARHGEF10	NOP2
TUSC5		SNRPA1	PALM2	ATG16L1	HBS1L	C2CD6	BAZ1A	KDELC1	CARF	KANSL1L	TXLNG	TUBD1	BCL2L13	NRP2	AGFG1	PHEX	PPARA	NOP2
MTPN		OR4F6	AL079342.1	STK33	AP1G1	TMEM237	AQPEP	ZNF80	TUBB3	KANSL1L	ZNF662	LSM12	CARNMT1	NRP2	KIAA1045	KCTD12	FAM160B1	NOP2
ZNF101		OR4F6	EPYC	NMUR2	WRNIP1	TMEM237	ATP11A	PHLDA1	ANP32B	KANSL1L	TMEM164	TMEM187	RECK	NDUFS1	GGCT	ADAR	MRPL36	NOP2
FOXN3		LOC102723502	FXN	CYSLTR1	RYBP	MPP4	RNF216	MXD3	YTHDF3	LANCL1	PPP1R12B	TCF12	PNRC1	NDUFS1	ZNF391	LHFP	SLC25A28	CHD4
UGT3A1		LOC102723502	B3GNT2	GADD45A	LRCH1	CDK15	ZEB1	C9orf41	TBX5	LANCL1	ZDHHC18	IL22RA1	KMT2A	NDUFS1	AC024257.1	RP11-195F19.5	TRIB1	CHD4
POLD4		LOC102723502	OAF	CTAGE9	ESRRG	CDK15	SCML4	IL5	PTPN14	LANCL1	CDX4	GPR82	BSN	NDUFS1	NUP62	DSC3	TRIM44	CHD4
CCDC69		LOC102723502	WNT8A	NCKAP5	NAV2	CDK15	KIT	MOB4	FLT1	LANCL1	CPT1A	PDK2	ZNF367	NDUFS1	GPATCH11	PI4K2A	SAMD4A	CHD4
KCNQ3		RHBDF1	ATP1B4	CTAGE8	ERBB3	KIAA2012	ASXL2	CACUL1	GIGYF1	CPS1	PPP1CB	DOCK3	SMAD2	GPR1	LRIF1	PSMD5	PLEKHG4B	CHD4
CCDC171		RHBDF1	TAF15	ABL2	EIF5A2	SUMO1	YY1	NUDT4	SPATS2L	CPS1	ICK	ARHGAP42	MAP3K4	GPR1	TRIM71	ZNF264	IQCK	LPAR5
PAPD7		RHBDF1	NCBP1	PDE1C	TMEM250	SUMO1	RUNX1T1	E2F3	DNAJB6	ERBB4	TENM1	PNPLA8	TTC37	ADAM23	RWDD2B	AC104667.3	ZNF516	LPAR5
MORN4		HBM	BICD1	ABCB7	TIMP2	SUMO1	CHST11	SCD	TP53INP1	ERBB4	PRKG1	PEF1	KCNMA1	ADAM23	ANKRD12	TASP1	KIAA0232	LPAR5
ARHGEF6		LUC7L	CAMK4	SNX29	BTBD10	SUMO1	ZNRF3	AMOTL2	KLF6	IKZF2	SRP72	MTMR2	RAB28	ADAM23	RPL27A	PSAPL1	ABHD4	LPAR5
PRKAB2		LUC7L	HCCS	CEP63	ZPLD1	BMPR2	SLC24A3	HPSE	KLF13	ABCA12	JAZF1	CERK	HAUS6	ADAM23	ATP5F1	MID1IP1	GRIA2	ACRBP
ADNP		LUC7L	ALDH1B1	B4GALNT3	MAP7	BMPR2	TGFB2	CHIC1	RAB37	ABCA12	FMR1	RPS11	SLC16A6	FAM237A	CENPI	NUP50	PSME3	ACRBP
MFSD5		LUC7L	DGKI	KRT38	TGFB2	BMPR2	SGTB	PI4K2B	RAB18	ABCA12	RBM20	PTGS2	NEGR1	DYTN	TM2D2	AGPAT2	LMX1B	ING4
RDH16		LUC7L	MAP3K7	PTPRG	EPHB4	FAM117B	DCUN1D4	KIAA1462	ZBTB8A	ABCA12	DACT1	UGT2B11	AAK1	KLF7	ICA1L	GDAP2	CREBRF	ING4
HDAC2		LUC7L	FAM153A	ZC3H12B	YIPF5	ICA1L	KLHL15	C14orf129	COL4A3	ABCA12	LEMD3	RNF126	SORL1	KLF7	KCNJ13	MAPK1	ROR2	ING4
C11orf57		ARHGDIG	MYO5C	DOCK3	ERRFI1	ICA1L	AGO3	STOX2	PPM1E	ABCA12	MAP2	RERG	CDHR3	KLF7	AP1G2	AL589765.1	IER5	ING4
TNFRSF1B		ARHGDIG	DSEL	ZNF684	TACC1	ICA1L	ZNF784	TTC21B	CASZ1	FN1	KLF3	MRGPRX2	TRABD	KLF7	SMPDL3B	RNF149	DMAC2	ZNF384
LRRC4		AXIN1	PGAP1	PGAP1	ROCK2	ICA1L	PTPRJ	ADAMTS3	GSKIP	FN1	NR3C1	SPO11	GRSF1	KLF7	AGAP6	SETD2	RAB35	ZNF384
CXCL16		AXIN1	RHOT1	ATG14	DMRT3	ICA1L	DIAPH3	VEZT	KRR1	FN1	FOXK1	MAGEA8	CCDC50	KLF7	C22orf43	KLB	KCTD15	ZNF384
SHE		RAB11FIP3	NFKBID	UBC	LYSMD2	CARF	RBM20	SORL1	FSCN1	FN1	CALHM1	RPL11	SH3TC2	KLF7	AMTN	GUCY1A2	KIAA1143	ZNF384
ZNF185		RAB40C	CCM2	MBNL1	TNF	CARF	TOB2	OSBPL8	ATAD2B	FN1	PAPOLG	C1orf95	ATXN3	KLF7	SPACA1	TERF2IP	KCNMA1	ZNF384
GPATCH1		RAB40C	DPH5	JARID2	PDE7B	NBEAL1	TOM1L2	MYLK	SORT1	FN1	GOLIM4	TMEM175	SWAP70	KLF7	PDE3B	WDR7	KIAA0930	ZNF384
HIVEP3		RAB40C	DIDO1	PPP2R1B	CIT	NBEAL1	NACC2	FAM105B	NPNT	FN1	ZBTB16	UHRF1BP1	ONECUT2	KLF7	MIXL1	CIITA	NRXN3	ZNF384
ZSCAN30		RAB40C	SLC9A2	ATP11A	KLF6	NBEAL1	TP63	STK17B	UBN2	FN1	ACTR1A	ANKRD20A4	ISCU	KLF7	RAB31	PPTC7	HIPK3	ZNF384
MRPL17		RAB40C	SIGLEC1	NFIA	CRISPLD1	CYP20A1	SMCR8	TCAIM	NAA16	FN1	GAB1	PLOD2	MTF1	KLF7	ABCC4	ANO4	NOL12	ZNF384
CAV1		METTL26	BMP5	DYNLL2	GADD45B	CYP20A1	ZNF275	AL353791.1	DCBLD2	FN1	NKAP	BTBD3	PRDM2	METTL21A	TMCO3	MACROD2	KDM5C	PIANP
ZNF705A		METTL26	NHLRC3	HBP1	MCC	ABI2	PTPN14	GABRB2	MSANTD2	FN1	FOSL2	UGT8	GCLC	METTL21A	PNRC1	RPE65	CRKL	PIANP
BEST1		METTL26	FSHB	ENTPD5	CYP2U1	ABI2	MIB1	RELN	RBM26	FN1	SLC38A4	CASP8	TRIM37	METTL21A	SLC12A2	SLC38A7	PRICKLE2	PIANP
ZNF705G		METTL26	TTC4	MEOX2	TRAM1	ABI2	CTIF	NF1	GPR107	FN1	MYCN	PPP1R3D	CPNE4	METTL21A	RBM7	ARHGAP35	GLIS3	PIANP
BTN1A1		JMJD8	RRM2B	PHF20	TBC1D12	ABI2	YIPF5	RABIF	SNAPC1	FN1	PCNX	FYB	DPF3	METTL21A	PDLIM5	WIPF3	TFAP2C	PIANP
KCNH8		JMJD8	ACAD8	DNAJC16	NLK	ABI2	MAML1	PCDH19	CKAP4	FN1	ABAT	CRYBA1	ATP5F1	METTL21A	NEDD8	ABCA2	PCYT1B	PIANP
HOGA1		JMJD8	DAB1	IPO9	RASGEF1A	ABI2	PRR5L	NCOA2	ZNF236	FN1	BPTF	PHLPP1	MAOA	METTL21A	BECN1	MBOAT2	SLC4A4	COPS7A
MAN1A1		JMJD8	CAP1	C5orf30	VPS37B	ABI2	THSD7A	GAB1	CACNA1C	FN1	CLASP2	KCTD16	ZNF112	METTL21A	GOLGA8I	CLIP2	C6orf62	COPS7A
GRAP		JMJD8	KCNMB1	ARAP2	SLC10A3	ABI2	ANKRD12	SMAD9	PHF21B	MREG	KIAA1468	ANGPTL7	TRIM33	CCNYL1	XKR9	LENG1	SOX30	COPS7A
WDR52		FBXL16	MCU	DEPDC1	SLC2A1	RAPH1	EPHB4	KIAA0895	CHD2	PECR	SCN8A	PLEKHG1	MAPRE1	CCNYL1	SERPINB3	CIAPIN1	ZNF767P	COPS7A
CCDC172		FBXL16	KLHL28	RRAGD	KCNJ10	RAPH1	TXNIP	B4GALT6	LIN7B	IGFBP5	ITPR1	LRRC8D	HLTF	CCNYL1	EFCAB13	RFX7	BTAF1	COPS7A
FOXO1		METRN	SLC16A7	CHST11	AMPD3	PARD3B	PFKFB3	GPR107	HCCS	TNS1	CDH6	C16orf72	TMED5	FZD5	HENMT1	SMG5	KY	COPS7A
AC092535.1		METRN	SLC25A46	SYT6	ST8SIA5	PARD3B	MOB3B	YWHAG	G6PC	TNS1	RNF38	TNFRSF10B	TEAD1	PLEKHM3	GPCPD1	CCDC68	WDR3	COPS7A
YIPF4		CCDC78	MMGT1	MXD1	AKAP7	PARD3B	ZC3H12C	KBTBD6	PTBP3	TNS1	HAS2	RNF5	MN1	PLEKHM3	GABARAP	KIAA1161	ZNF608	COPS7A
MAP3K15		NARFL	SOX15	CDK19	LAMC1	PARD3B	IGSF3	ATP11C	SSR3	TNS1	CCDC117	GPNMB	CKB	PLEKHM3	HMGB1	SYNGAP1	DNM3	COPS7A
KRT80		RPUSD1	ZNF829	DICER1	PTGFRN	INO80D	RACGAP1	LIN7A	ZSWIM4	TNS1	NCMAP	SYF2	FCHSD2	PLEKHM3	DDI2	SLC9A8	NTN4	COPS7A
CEACAM6		RPUSD1	SULT4A1	EREG	SNN	INO80D	LRRTM2	DDX55	DMRT2	TNS1	FGF18	TMCC3	LGALS8	CRYGD	RNF103	TMEM108	SLC44A1	LAG3
B3GAT1		CHTF18	LMCD1	C7orf60	ADAMTS19	NDUFS1	FBXO10	EPS8	DNAJC5	TNS1	ATMIN	CTB-186H2.3	FBXO5	CRYGB	TSHR	PXDC1	PMP22	CD4
ASAH2		CHTF18	SLC9A9	TSC1	TFDP2	NDUFS1	GPCPD1	C1orf173	CDK16	TNS1	PI4KB	KLHL32	CDC14B	CRYGA	C9orf57	SSX1	TSPAN17	GPR162
GUCA2A		GNG13	FAM13C	MDM4	NRARP	NDUFS1	EFNB2	MMD	ERI1	TNS1	SBF1	NARG2	FUT4	C2orf80	SNUPN	MRPL36	TFDP2	GPR162
ELOVL2		SSTR5	SPTLC3	ZNF207	CSK	NDUFS1	INO80	CCNT2	NYAP1	SLC11A1	AKT2	NXN	INTU	C2orf80	RNF126	H2AFY	FBXL19	P3H3
PPP4R1		SSTR5	RPS6KA3	DRAXIN	FLOT2	NDUFS1	CHD9	GPR135	NUMB	CTDSP1	PFN2	FNBP4	MPP6	MAP2	SERPINB4	SLA2	MTDH	GNB3
ARL5A		CACNA1H	TMEM239	SBNO1	RBM17	GPR1	MLLT10	MFAP5	DARS	CTDSP1	SMARCD1	KBTBD6	DONSON	MAP2	HPSE	SH3BGRL	MXD1	GNB3
TBC1D24		CACNA1H	GBP2	KIF6	MASTL	GPR1	ZFC3H1	PIK3C3	NANOS1	CTDSP1	KATNAL1	GDF9	FRMD4A	MAP2	PDK4	ZNF407	YPEL2	CDCA3
KCTD9		CACNA1H	RPS6KA6	CENPP	EPB41L1	GPR1	NUS1	PSAT1	VCPIP1	USP37	XKR4	CDCA7	KCNC2	MAP2	KRBA1	FAM196A	DIDO1	CDCA3
PAWR		UBE2I	HPS3	DIAPH2	CHD7	GPR1	SLC25A44	PRKACB	IPO8	USP37	PKP1	TFDP1	ZNF576	UNC80	ALX1	ARMC1	FUNDC2	CDCA3
ITPR2		UBE2I	CNOT7	BEND4	CTSK	ADAM23	RALBP1	CRKL	RABEP1	USP37	KCNJ15	BTC	DNAJC21	UNC80	TMEM178B	CNTNAP5	SDHAF2	CDCA3
AKNA		UBE2I	SMAD5	SLC35E2B	ARX	ADAM23	DNM2	DPY19L3	SEC24A	USP37	RLF	ABCA12	RPS23	UNC80	MEST	USP6NL	SLC35B4	CDCA3
PCDHGB1		UBE2I	LITAF	SPTLC2	BAZ2A	MDH1B	PTPRM	TRHDE	ZNF148	USP37	FRMD6	MLANA	PIK3R1	UNC80	ST8SIA1	DIMT1	ARSD	USP5
TRAIP		UBE2I	ATF7IP2	TMX4	FAM13A	MDH1B	TNRC6B	KIF14	XKR4	USP37	DTNA	HAUS5	SLC7A2	UNC80	ST8SIA4	PROK1	DNMT3A	USP5
NGFR		UBE2I	NFATC2	PGR	FAM234A	MDH1B	TMEM9B	N4BP2	CLIP2	USP37	DGKH	TMEM2	N4BP2	RPE	MOV10L1	WLS	PTDSS1	TPI1
NAPEPLD		BAIAP3	ZNF354C	USP37	BRWD3	MDH1B	NEK9	KIAA1432	GALNT2	BCS1L	BCL11B	AL357673.1	WASHC4	RPE	SLC26A4	TM4SF18	ARRDC4	TPI1
FOXRED2		BAIAP3	CLEC1B	TRAF3	DEDD	MDH1B	UBN2	C16orf72	B4GALT6	STK36	HNF1B	HEATR3	SPRED1	RPE	HTR2B	MED20	SCOC	TPI1
CCNF		BAIAP3	STXBP5L	ZNF101	SP1	MDH1B	SALL3	SNTB2	NREP	STK36	NKD1	KLRF1	NCOA1	RPE	MBNL2	STARD6	SMG7	TPI1
FMNL2		BAIAP3	CCNYL1	PPP2R5E	SYNCRIP	FASTKD2	ANKRD52	C18orf63	SLC35F4	STK36	ZNF362	EFR3A	TRAM2	RPE	HOXA13	GGNBP2	ACKR2	TPI1
BCL6		BAIAP3	RAB2A	PITPNM3	TERF2	FASTKD2	SLC27A1	SEC23A	CHRDL1	TTLL4	ITSN1	YAE1D1	F5	RPE	VWC2	GPR123	COG6	TPI1
TMEM47		BAIAP3	GOLGA8M	NUP155	MAPK1	FASTKD2	SLC2A1	ZBTB10	PHC3	WNT10A	RLIM	YPEL5	MCMBP	RPE	CTSO	F7	UQCC2	SPSB2
DDAH1		BAIAP3	NFYB	FAM217B	DMXL1	FASTKD2	EBF3	GNAQ	EIF3J	CFAP65	PKD1	ANKRD20A3	CCDC71L	RPE	PAX5	METRN	PELI1	SPSB2
SLC35E2B		BAIAP3	DLK1	MKLN1	PGAP1	KLF7	KMT2A	VASH2	PPP1R12B	CFAP65	INPP4A	LTBP1	DISC1	RPE	PDE11A	SECTM1	MBNL2	SPSB2
AC124890.1		BAIAP3	OTUD1	GPR180	FBXO9	KLF7	LIN28A	NFIA	DIRAS2	SLC23A3	ESRP1	PTPN23	SAMD8	RPE	PLCE1	UNC5A	GNAI3	SPSB2
SSX4B		BAIAP3	MED20	RP11-111M22.2	SCN3A	KLF7	NEURL1B	KIAA2018	PMPCB	SLC23A3	MFHAS1	GABRA6	ZFHX3	KANSL1L	MAD1L1	FASN	NPR1	SPSB2
HMGXB4		UNKL	DLL1	MINOS1	FAM155A	KLF7	ANKRD13C	CDC73	NAV3	CNPPD1	LRRC8A	FOLH1	STAU2	KANSL1L	KCNJ6	ZBTB7A	PURB	LRRC23
F13A1		UNKL	ASAH2B	AKNA	CNTN4	KLF7	CLOCK	RBM12B	MKLN1	CNPPD1	RPS6KA2	SYK	KLHDC1	KANSL1L	XIRP2	PDXK	CCNG2	LRRC23
UBFD1		UNKL	CLEC2D	EMR2	WRN	KLF7	TBCEL	SLC5A3	ZNF362	ZFAND2B	LHX9	NF1	SP4	KANSL1L	AC023632.1	FLT4	CPED1	LRRC23
ZDHHC23		UNKL	RAPH1	EIF4H	E2F3	KLF7	KCTD20	KIAA1244	PI4KB	ZFAND2B	DENND5B	PTCH2	CD19	LANCL1	ANKRD49	CYHR1	SHB	LRRC23
GPR64		UNKL	RAB11FIP2	FAM84B	ZNF451	CREB1	NBEAL1	GXYLT1	TLN1	ZFAND2B	OSR1	SEL1L3	EHBP1	LANCL1	SCN3B	PPP2R3B	DENND5B	LRRC23
BAG4		UNKL	FAM169A	BVES	TMEM170B	CREB1	NAV2	ZC3H6	KBTBD6	ANKZF1	MIER3	TMF1	EDC3	LANCL1	FGF5	TTYH2	ADCY5	ENO2
ABCC1		PTX4	SLC17A4	NDUFA10	PIK3IP1	CREB1	PRKG1	BEND4	HCFC2	ANKZF1	NUDT3	PITPNB	TAB3	LANCL1	JKAMP	HMCN2	TMEM204	ATN1
NPY2R		TELO2	COL25A1	CNR2	TXNIP	CREB1	AP005482.1	PLCXD1	RPGR	ANKZF1	RAB23	MLLT4	UACA	LANCL1	VCPIP1	MYO9B	MXRA7	ATN1
FAM216B		IFT140	FCRL3	KPNA6	ANK2	CREB1	SAMD8	SLFN5	SCN1A	STK16	LEPROTL1	SPRY2	DDHD2	LANCL1	SNRPF	VPS37D	BTBD9	ATN1
OPA1		CRAMP1	SLC6A5	FOXO3	TBPL1	CREB1	NRARP	HDAC2	SRSF10	STK16	TIAL1	PHF21A	PLAC8	LANCL1	HELLS	GPR56	CIRBP	PTPN6
MUC17		CRAMP1	GCM1	hsa-mir-4763	CRY1	METTL21A	RORB	SESTD1	C11orf87	STK16	HCN1	SPDYE1	SYNCRIP	CPS1	REL	FNBP1	MMP16	PTPN6
TMEM67		CRAMP1	AC021218.2	CLNK	PPP1R9A	METTL21A	IL6ST	KPNA6	SLC35B4	STK16	SRSF2	IFNK	HS2ST1	CPS1	FZD3	FOXE1	RAPGEF1	PTPN6
U52112.12		MAPK8IP3	PCGF3	SRC	DEPDC1	METTL21A	BZRAP1	KIF6	SCOC	TUBA4A	CDC42EP3	RTN4	MTHFD2	ERBB4	TMEM175	TNFAIP8L1	C11orf87	PHB2
SCMH1		MAPK8IP3	CADM2	2020-09-09	PTPN2	METTL21A	PRKAB1	TULP4	MAPK7	TUBA4A	HCCS	SLC33A1	CD109	ERBB4	RELN	SYNGR1	OSBPL2	PHB2
TRIP11		NME3	TMEM67	TRIP11	MREG	METTL21A	FIGN	TNRC6B	CDH6	DNAJB2	RBFOX1	NOL10	WDR72	ERBB4	COLEC12	VIPR2	TCEANC2	PHB2
C2CD4A		NME3	RBM11	SLIT1	LY75	CCNYL1	KCNB1	SPTLC2	CDKN2AIP	PTPRN	SFXN1	MT1H	CTBP2	ERBB4	CAP1	PACS2	ZMYND11	LPCAT3
CCT5		NME3	DKK3	TEF	MAGI1	CCNYL1	SYNM	RC3H1	ELMOD1	PTPRN	EXOC6B	BMF	MLLT10	IKZF2	PRMT2	RNPEPL1	EEF1AKMT2	LPCAT3
IREB2		NME3	ZNF557	EMP2	TNRC6C	CCNYL1	PPP6R3	FRS2	LATS1	PTPRN	GAN	PPARD	VPS50	IKZF2	KRTAP4-11	OTUD5	ANO2	C1S
BCLAF1		EME2	PRR5L	PDDC1	ATP13A3	CCNYL1	TANC1	C11orf87	MORC3	DNPEP	RALGPS2	FAM134C	RGPD8	IKZF2	CTD-2370N5.3	WDR38	SPEG	C1S
NOV		NUBP2	KLHL5	ERLIN2	ENPP4	CCNYL1	CCRN4L	TNKS	ARFGEF3	DNPEP	CSMD3	C5orf30	LMO3	IKZF2	ARL4A	TAZ	ITSN1	C1S
NIP7		NUBP2	PPIF	CCDC93	NCKIPSD	CCNYL1	LGALSL	SOX6	ARL2BP	DES	YOD1	PKN2	COL3A1	IKZF2	NBEAL1	RSPH9	PHF20L1	C1S
ZNF207		NUBP2	HTR5A	CCDC69	PDK1	FZD5	PRR14L	PDE4D	DR1	SPEG	NRIP1	KLF9	GPR173	SPAG16	MOB1B	VAV3	WISP2	C1S
EXOC8		NUBP2	HS6ST2	TMEM241	AMMECR1	CRYGA	HLF	MAP9	CNOT4	SPEG	ANK3	VEZT	LCA5	BARD1	BAMBI	RGS9BP	RDX	C1S
ITGB8		IGFALS	AP000679.2	TULP4	VGLL3	C2orf80	ZCCHC24	FAM222A	PPP1R9A	GMPPA	HNRNPK	IFNB1	GFM1	BARD1	SP3	TBCD	2020-03-04	C1R
CREB5		IGFALS	PAQR8	RAB27A	PUF60	PIKFYVE	TAF1D	OPA1	HDAC4	GMPPA	OSMR	CDH11	CRY1	BARD1	EMB	NUDT16L1	IBA57	C1RL
MYBL1		IGFALS	TNFAIP1	EXOC2	PRNP	PIKFYVE	CBX6	MYO5A	RNGTT	ASIC4	SYNJ1	TRAPPC11	ST13	ABCA12	TOE1	C6orf106	SUN1	C1RL
LACC1		HAGH	SPOCK1	OPCML	LRRC41	PIKFYVE	ITGA9	DIAPH2	NIPBL	ASIC4	TMX4	BANP	DLG2	ABCA12	IQUB	SLC29A2	WDFY1	C1RL
LGI2		HAGH	GART	SPRY4	SMAD4	UNC80	IPCEF1	PTEN	HCN1	CHPF	IGSF3	CRYM	MSTN	ATIC	IL18R1	ZNF850	NPLOC4	C1RL
BCL6B		MEIOB	SPG20	LMO4	ANKFY1	UNC80	RALGPS1	REPS2	IMMP2L	CHPF	COL4A3	FAM208A	LCOR	FN1	DLEU7	SEC16A	PDPK1	C1RL
DIAPH2		MEIOB	SNRNP48	TSHZ2	LSM14A	UNC80	CREB1	ARHGEF6	AUTS2	TMEM198	EIF3J	TMEM99	CEACAM6	FN1	SFXN1	IER3	GSPT1	RBP5
USP15		HS3ST6	HBP1	STK10	DNAL1	KANSL1L	TMEM167B	KPNA1	UHRF1BP1	TMEM198	BACH2	MSX1	TYW3	FN1	IL26	TBC1D1	PPP1R3B	CLSTN3
FGF7		RPL3L	OLFML2A	ZNF563	ITPRIPL2	KANSL1L	ITGA11	UBE2V2	NECTIN4	OBSL1	CREB5	C3orf55	ZBTB38	FN1	RPL23A	AVL9	PLPP1	PEX5
HOXB9		RPL3L	PAPOLG	DUSP19	VANGL1	KANSL1L	NCOA1	EIF3F	ETS2	OBSL1	UBN2	PRDM8	SMAD5	FN1	SH3BGRL	OTUD3	WDR44	PEX5
FAM180A		RNF151	MUT	C1orf64	TP53INP1	KANSL1L	MPP6	PAQR8	HEG1	SLC4A3	CAB39	TMEM211	NR5A2	FN1	AMZ2	TEAD3	TXLNA	PEX5
ADARB1		RNF151	CR769776.1	ZBTB43	ERP44	LANCL1	GMEB1	NUP155	PTPN11	SLC4A3	SOAT1	KCNA3	ERCC6L2	FN1	ZRANB2	ZNF473	ZBTB34	PEX5
NYAP1		TBL3	GPX8	PLCXD1	CEBPE	LANCL1	ZDHHC7	SMAD7	GNPDA1	SLC4A3	EFNA5	FAM118B	RALGPS2	FN1	ADAM10	MRPL12	ELAVL1	PEX5
STK4		TBL3	ALG10B	KIR3DX1	IPCEF1	LANCL1	GAPVD1	MLEC	FAM81A	SLC4A3	IGF2R	RP11-861L17.3	YTHDF3	FN1	MPP7	WDR48	ERLIN1	PEX5
ANKRD29		NOXO1	REV1	CAMKK2	PCNX1	LANCL1	TAOK1	GABPB2	MEX3D	EPHA4	ESRRG	MS4A4E	ZDHHC17	FN1	DNM3	RCVRN	ST6GAL2	ACSM4
FBXW7		NOXO1	VTI1B	FBXO32	RUNX1T1	LANCL1	ZBTB37	KRT80	CFAP97	EPHA4	ATP2A2	ZNF528	SASS6	TMEM169	SS18L2	C18orf1	RSBN1	ACSM4
TUFT1		NOXO1	RFX3	ADCY9	AR	LANCL1	TRPS1	FOXN3	IRS1	PAX3	FAM168B	LRRC3B	CA8	XRCC5	STEAP2	HP1BP3	FAM13A	CD163L1
PPP1R3E		NOXO1	SRP19	AGPAT4	IGF2BP1	LANCL1	STARD13	ZBTB43	SCN2A	PAX3	DCAF5	ZNF417	2020-09-10	2020-03-04	ZNF736	CACNA1A	CEP350	CD163L1
TMEM246		NOXO1	PARD6B	HIVEP3	GATAD2B	LANCL1	FAM78A	RAPH1	ZNF395	PAX3	WDR12	AC114772.1	TMCC1	SMARCAL1	UBE2E1	MYO16	PMEPA1	CD163L1
DCBLD2		NOXO1	ENOSF1	C1orf198	ZEB1	CPS1	NFIC	FKBP9	NPM1	PAX3	MYT1	COX7A2L	CSRNP3	SMARCAL1	POPDC3	EPG5	SYNE2	CD163L1
TRPA1		SYNGR3	MYO9A	SLC35B4	PPP6R2	CPS1	WHSC1L1	CELF2	FOXP1	PAX3	SRRM4	ZNF268	SERF1A	TNS1	KLK7	SV2B	CLCN5	CD163L1
CCDC150		ZNF598	NFIB	RASGRF1	HERC3	ERBB4	OSTF1	FOXO3	JADE3	SGPP2	NPNT	VASH2	NUS1	TNS1	SECTM1	SV2C	DLG1	CD163
PGAP2		NPW	NR6A1	EIF3F	USP31	ERBB4	TFDP2	HLA-DOA	TMEM17	ACSL3	ASXL3	SLC25A24	RIPOR3	TNS1	C1orf185	SNN	LIN7C	CD163
EOMES		NTHL1	ICAM1	CLCN7	NOCT	IKZF2	TERF2	GIPC3	ZNF697	ACSL3	CLIP2	RABIF	LRRCC1	CXCR2	ZNF589	YBEY	HACE1	CD163
ZFHX2		NTHL1	MLANA	PAWR	PI4KA	IKZF2	ZADH2	hsa-mir-4763	NCOR2	KCNE4	DDX3Y	PBLD	TCF12	CXCR1	FAM49A	CEP250	DEPDC5	CD163
TMEM215		NTHL1	CCSER1	DNAJC6	SPRED1	IKZF2	RNPEPL1	S100A7A	AKAP7	WDFY1	TP73	RSBN1L	ZCCHC24	AAMP	UBE2D1	ZNF215	UBE2D2	CD163
TYMS		NTHL1	RNF121	RBM15B	YY1	BARD1	SEL1L3	CCND2	HPS5	MRPL44	MOSPD2	CDC73	SETD7	AAMP	PTP4A1	BFAR	MAP3K20	CD163
CCDC8		TSC2	AC117395.1	CES3	RNF165	BARD1	TNRC6C	ALCAM	MKL2	SERPINE2	DNAJB14	PEX3	SCAI	TMBIM1	AIFM1	TMEM236	FGFR1	APOBEC1
CLDN16		TSC2	DCUN1D4	DSCR3	ZDHHC14	BARD1	SERBP1	U2SURP	2020-03-06	FAM124B	TRIO	SLC22A16	TMEM38B	TMBIM1	FADS2	SSX5	SEC24A	GDF3
CENPP		TSC2	DNAJC22	FOXN3	WNT10A	BARD1	ADARB2	SEMA3A	MCC	FAM124B	SLC38A2	DMGDH	RASSF8	TMBIM1	CD58	AC110781.3	DNAJB6	DPPA3
PDE7A		TSC2	C15orf38	NFATC2	ANKRD52	BARD1	SRSF10	SLC1A3	TRIM44	CUL3	TRIM2	C1orf52	MYEF2	CATIP	GSG2	IL17RA	CD99L2	CLEC4C
ANKRD34A		TSC2	LPXN	SLC17A5	MAST2	ABCA12	ITPK1	MAN1A1	ERLIN1	CUL3	GDI2	PRKAR2A	ADO	VIL1	CEP135	PILRA	RALGAPB	CLEC4C
NAP1L6		TSC2	RNPC3	GIMAP1	CCDC71L	ABCA12	AMPD3	BVES	DDX1	CUL3	DPY19L1	LDLRAD2	RNF38	USP37	SERF1A	IRF9	KCNK3	NANOGNB
ZNF28		TSC2	PACSIN1	AICDA	ABCE1	ABCA12	PAFAH1B1	ENPP1	GAL3ST1	CUL3	DCDC2	PPIAL4C	MIS18BP1	USP37	SERF1B	NNAT	SERTAD4	NANOG
SPTY2D1		TSC2	VPS37B	RAD18	NOG	ABCA12	ERBB4	DCAF5	TMOD3	CUL3	PTEN	PAIP1	FAM135A	USP37	CLDN22	EVL	CALM2	NANOG
SAP18		TSC2	MUC15	ZNF285	PDZD11	FN1	ADCY2	FBXO32	NCAM1	CUL3	KCNB1	DNTT	DLAT	USP37	CTC-534A2.2	AC005594.1	NTNG1	SLC2A14
CENPL		PKD1	GPR157	CPA4	HTR2C	FN1	OTUD4	GIMAP6	DCX	COL4A4	IMPAD1	DTNA	ZFP36L2	USP37	PPIA	STARD7	GDF6	SLC2A14
SCD5		PKD1	PSENEN	RBL1	KIF5C	FN1	MBNL3	PLP1	FAM19A5	AGFG1	RUNX1T1	HENMT1	EDA	CNOT9	C5orf24	CTC-510F12.4	PAPD5	SLC2A14
INPP5D		PKD1	KLK7	PDAP1	ITGA4	FN1	NHS	ARMCX3	NRP2	AGFG1	GREM2	ANKRD20A2	PMEL	CNOT9	RBBP5	CRHBP	ABTB1	SLC2A14
ELF5		PKD1	KIAA0947	NAPEPLD	FAM45A	FN1	SCARA3	CBX2	FREM2	AGFG1	SLC23A2	RHOBTB1	TNNI1	PLCD4	HUS1	HCN4	OVOL1	SLC2A14
TAGAP		RAB26	ZNF582	MIER3	SMCR8	FN1	TACC1	C12orf29	FARP1	AGFG1	TMEM245	RIN2	ANGPT2	PLCD4	FGL2	PELI2	RPTOR	SLC2A14
ZNF627		CASKIN1	MOB1A	CHMP7	BAG5	FN1	ATXN2	DCAF4L1	USF3	AGFG1	TEC	TBC1D23	VEZF1	RNF25	GBE1	C9orf118	TMEM108	SLC2A14
ZNF382		CASKIN1	ACSL3	NAGA	ING1	FN1	EPB41L1	KDM4A	AHNAK	AGFG1	NGEF	CYSLTR2	AGPS	STK36	ENTPD1	SLC1A4	YY1	SLC2A14
PIK3CB		E4F1	OXNAD1	FOXRED2	TOM1L1	MREG	ITGA4	ACADL	SSH2	AGFG1	EIF4E3	IL3	CHL1	STK36	RCAN1	C3orf18	SGCD	SLC2A14
PCOLCE2		E4F1	RAB30	ARHGEF6	NKAIN2	2020-03-04	TGFBRAP1	C2CD4A	PLPP6	AGFG1	CYTH3	IQCB1	DUSP1	TTLL4	REP15	RNF7	DDX50	SLC2A14
EIF2C4		E4F1	GLT6D1	ELOVL2	COL2A1	SMARCAL1	SP1	ZFAT	RSBN1	GABRA1	LYSMD3	ALG10B	CNR1	TTLL4	CYSLTR2	ICA1L	PRDM5	SLC2A3
CCDC93		E4F1	UTP14C	MFHAS1	RAI2	SMARCAL1	PCYT1B	ERLIN2	LMAN1	CCNG1	FSTL4	WWC2	FGF12	TTLL4	RBM24	ZFP3	SCN1A	SLC2A3
WNT8A		E4F1	PFN2	OLA1	WDR1	IGFBP5	ZBTB7A	EIF4H	MON2	CCNG1	CDK13	HIBCH	EDEM1	TTLL4	HIRA	ZNF516	GRHL1	FOXJ2
SPRR2A		ECI1	FBXO3	NANOS1	SLC2A4RG	IGFBP5	ZNF827	TUSC5	PAPOLG	NUDCD2	SHROOM4	ZNF395	CLVS1	WNT6	ALG1L	SLC7A11	NIN	FOXJ2
SOS1		ECI1	DCTN5	KDM4A	LARP4B	TNS1	SLC39A10	SOCS3	ERG	WWC1	MBD5	HSPA2	UBE2E1	CFAP65	TRIM6-TRIM34	GJA4	EPHA2	NECAP1
FAM217B		RNPS1	ARFIP1	FAM177A1	ITGA11	TNS1	MTMR12	CLPX	LIN28B	WWC1	NAPB	FZD4	ERGIC2	CFAP65	AP3B2	ZNF420	ZNF587	NECAP1
PLEKHH1		RNPS1	PCOLCE2	TTC5	SMG1	CXCR2	PTPRD	ENPP4	TMA16	WWC1	NIP7	NUP62	HAT1	CFAP65	C1orf95	KANK3	EPB41	CLEC4A
ALDH1A2		RNPS1	CBFB	CCND2	TANC2	CXCR1	USP13	EGR1	DNA2	WWC1	SEC61A2	HECW1	NDFIP1	CFAP65	EID1	POMT2	EXTL3	CLEC4A
AC005481.5		RNPS1	LSM11	CA5B	TEAD1	CXCR1	HIPK3	PPP1R3E	USP46	RARS	RNF169	IL6ST	TSNAX	CFAP65	FGFR1OP2	SHH	PRMT1	CLEC4A
TIGD6		RNPS1	C17orf80	SLFN13	POU6F1	AAMP	INSIG1	LYSMD4	TRIM62	FBLL1	SRGAP1	CLEC10A	SLC6A14	NHEJ1	KIAA1549	RAP2B	SOX12	CLEC4A
MRPL35		ABCA3	IL17RD	C2CD4A	STEAP4	AAMP	ERC1	SCN2A	STRN3	FOXI1	CASK	RELN	VBP1	RETREG2	IGF1	CPEB2	ATXN10	ZNF705A
SYNE1		ABCA3	ZNF74	LDB3	VGLL2	TMBIM1	ADAMTS19	KIF5C	MAPK1IP1L	FOXI1	LCOR	FYCO1	PDE11A	RETREG2	ZBTB8B	HOXA1	GAS2L1	ZNF705A
B4GALT3		ABCA3	ZNF253	C2orf71	RXRA	TMBIM1	SLC12A7	NUDT16	WNT16	KCNIP1	TAOK1	C14orf129	ACYP2	ABCB6	SMG1	GAN	EPG5	CLEC4D
FBXO32		CCNF	ALCAM	TMEM164	FAM107B	TMBIM1	AFAP1L1	GOLPH3	SUGT1	KCNIP1	RAB4A	GFOD1	BCAP29	ABCB6	FAM63B	ZFX	SNX18	CLEC4D
CNN3		TEDC2	GOLGA6C	LIN54	GALNT4	TMBIM1	IGFBP5	DDX6	SCN5A	KCNIP1	STX1A	FAM105A	ASB4	ATG9A	TMEM170B	VHL	SCAMP1	CLEC4E
SULF1		TEDC2	TTPAL	PGAM5	ARL4A	TMBIM1	ZNF609	EMR2	SLC39A8	KCNIP1	FAM107B	TBC1D3B	DPP10	ATG9A	ISCU	HNF1A	DTNA	MFAP5
NCKAP1L		NTN3	ANKRD49	MYO1C	TOMM70	TMBIM1	ATRN	ADCY9	LRRC8A	KCNIP1	DAG1	OCIAD2	CGGBP1	ATG9A	TIMM9	DNAH10OS	RAD52	MFAP5
PIGM		ATP6V0C	PRPF38B	KDM4B	C3orf58	USP37	RASAL1	DEF8	SIX1	GABRP	PRKAB1	BRI3BP	OLFM3	ANKZF1	ACTR3B	RHOT1	PDS5B	MFAP5
ARID5B		ATP6V0C	FAM53C	PNPLA2	UBFD1	USP37	KIAA1462	FAM126B	CALCR	GABRP	OTUD4	TMCC1	MFSD4B	ANKZF1	COQ10A	WDFY1	NUCKS1	MFAP5
KRTAP9-7		AMDHD2	FITM2	COQ10B	VPS4B	USP37	GPBP1	CCDC170	SIX3	TLX3	TOR1AIP1	C14orf23	KIAA1147	ANKZF1	LSMEM1	FBXO40	CASP10	MFAP5
ZNF569		AMDHD2	GJB6	ADIPOQ	PLSCR4	USP37	XKRX	SIK3	BCL2	NPM1	KLHL3	GCFC2	RHOBTB1	ANKZF1	VKORC1L1	BDNF	TMEM237	MFAP5
GPM6A		PDPK1	UBE2V1	TTC9	NHSL1	USP37	ERBB2IP	KIR3DX1	NGEF	NPM1	CGGBP1	HK2	UBE2D2	GLB1L	TBC1D3C	DEPTOR	DEPTOR	MFAP5
CAPN7		PDPK1	NDEL1	TEX22	ZDHHC2	USP37	KAT7	FRMD5	SLC25A36	NPM1	YME1L1	SMEK1	SSFA2	GLB1L	TBC1D3G	CNTN6	SAP30BP	MFAP5
BTG1		PDPK1	NLGN1	BAIAP2L1	NIN	USP37	SCRT1	RP11-298P3.4	DCUN1D4	NPM1	MAP1B	AFM	ADNP2	STK16	MAP3K13	AC006372.1	ZHX2	MFAP5
MTPAP		PDPK1	ARL5A	SLCO2B1	KLHDC8A	USP37	GRID2	FOXO1	ADCY9	FGF18	ATP11B	AL353791.1	SLC25A32	STK16	TMEM17	VMP1	AP1S2	MFAP5
CHN1		SRRM2	CCDC117	PYCRL	RSBN1L	CNOT9	LRCH2	SHE	STX1A	STK10	SLC2A3	ZNF705D	SLTM	STK16	CCDC59	OSBPL2	CLN8	RIMKLB
RSPO2		PRSS41	TNFRSF19	SIGMAR1	USP13	CNOT9	PITPNM2	CCDC171	ENSA	EFCAB9	DDIT4	POLQ	MEST	STK16	XYLT2	NOL12	UBQLN1	RIMKLB
ENPP6		PRSS21	SH2D1B	AGMO	ATP2B1	PLCD4	MAFG	MARCKSL1	CLOCK	SH3PXD2B	IFIT5	DBF4	HMGB1	STK16	COX7B	POLR3F	FANCF	RIMKLB
KLHL20		PRSS21	ZNF233	HNF1B	PTGER2	PLCD4	VANGL1	THUMPD1	AFF1	SH3PXD2B	TEAD1	RCBTB2	EPAS1	STK16	ASB8	CPED1	NAT8L	RIMKLB
PRAMEF3		PRSS21	C2orf69	LIN52	SCML2	PLCD4	WNK3	PHKG2	CASD1	SH3PXD2B	PHF16	DGKB	FAM133A	STK16	RABGAP1	NR3C2	SNX27	A2ML1
GPD1L		FLYWCH2	CCDC137	GOLGA6L1	BBX	PLCD4	RALGAPA2	POGK	ITSN1	SH3PXD2B	FAT3	MAP3K4	ISPD	STK16	TRIM49	AGPAT6	GATAD2A	A2ML1
RP11-298P3.4		FLYWCH2	TDRD10	C11orf92	HHEX	ZNF142	MAP4K4	SDE2	TBX18	DUSP1	NUMB	PLSCR1	IPO8	DNAJB2	ARL15	UBE2QL1	LCOR	A2ML1
ALCAM		PKMYT1	NEFM	TNFSF14	STAT3	ZNF142	IL15	MORN4	SRGAP1	STC2	NAB1	CBWD1	WDR17	RESP18	B4GALNT4	ZNF284	TTC33	A2ML1
HOXC13		PKMYT1	THSD7B	GINM1	API5	STK36	SGCB	ZHX1	KIAA0895	DRD1	SPATA2	CLK2	MDM2	DNPEP	RS1	WSCD1	HIC1	A2ML1
ZNF831		ORC2	SERINC5	WASF3	RALA	STK36	SYT2	MC2R	MAFG	SFXN1	ENDOD1	TBC1D3	MYZAP	LOC100996693	PET100	TPD52L2	PAPPA	PHC1
MYLK4		FAM126B	PAQR9	SCAMP5	ZNF652	TTLL4	COG5	ABCG2	THAP2	FAM153B	ELK4	TBC1D3C	RAB6B	TMEM198	TRIM31	SIPA1L3	WDR37	PHC1
ID4		CFLAR	CD160	CNIH4	OCRL	PRKAG3	TEX261	AKAP10	AKT2	KIAA1191	SEC24A	TIMM8B	ZHX1	TMEM198	DOK6	CYB5B	AGO1	PHC1
GHR		CFLAR	ZNF300	TRIM44	ANXA4	WNT6	GATAD2B	ABCC1	SCN8A	KIAA1191	WNK3	MRPS36	DYNC2H1	OBSL1	TRIM49C	SDHD	KCTD11	PHC1
KDM6A		CFLAR	PNISR	MAPKAP1	RPS6KB1	CFAP65	DDI2	GOSR1	CRH	KIAA1191	CACHD1	CCL15	SUMO3	EPHA4	WIF1	CHST1	GPR85	M6PR
PHF16		CFLAR	LTBR	MRI1	SCN9A	CFAP65	ANKIB1	NCALD	USP47	KIAA1191	DMRT2	PI4K2B	LAMA4	EPHA4	RGN	FAM13A	KIAA0141	M6PR
ADAL		CFLAR	LIX1	TP53INP2	TENM1	CFAP65	STON2	BEST1	PAK2	FAF2	GDF6	RNF103	ME2	EPHA4	ELAC1	TSTD2	SOX6	KLRG1
NFATC2		CFLAR	OR7D2	AK1	ARMT1	RETREG2	SYNCRIP	TMEM241	GTPBP10	CDHR2	CEP85L	DUSP22	SPOPL	SGPP2	STK39	THOC5	CHD2	KLRG1
CTCFL		CFLAR	LPGAT1	CYP2W1	TET3	RETREG2	RBM17	YIPF4	SUSD5	CDHR2	ASH1L	RIF1	UHRF1BP1L	FARSB	TMEM56	TBC1D16	LMBR1	KLRG1
PRAMEF18		CASP10	FUT11	C8orf31	SAMD8	ZFAND2B	SBNO1	USP9Y	GAN	GPRIN1	LPPR4	EDEM1	CDC42SE2	MOGAT1	RPP25	CCDC144A	NDUFA10	KLRG1
RBL1		CASP10	C11orf57	PAG1	C11orf57	ATG9A	LYSMD3	B3GNT5	TJP1	EIF4E1B	WIPF1	DDX60L	PHACTR2	MOGAT1	B3GNT2	GRM6	PKN2	A2M
GAR1		CASP10	ELK4	AC092535.1	PRR15	ATG9A	ACVR1C	APPL1	DDX55	HK3	RPS6KA3	SOWAHB	ZNF626	ACSL3	DAZAP2	KLHL31	ZMAT4	A2M
PPP3CB		CASP10	GNPDA2	NSUN3	AGPAT3	GLB1L	SCUBE3	GIPC2	C7orf43	UIMC1	AP5M1	TYRP1	DDX3Y	ACSL3	TRPM3	MBTD1	APLP2	PZP
MTMR10		CASP10	ZNF821	NAP1L6	TMOD1	PTPRN	KIAA1217	GPR137B	PPP1R9B	UIMC1	RAPGEF1	RBMX	F2RL1	ACSL3	DCTN5	RIT1	PMM2	PZP
SNCAIP		ALS2CR12	ZNF420	TRIM52	CNOT2	PTPRN	FAM222A	SCD5	PSAT1	UIMC1	RAB8B	CHCHD1	REEP5	ACSL3	NGLY1	FAM102A	KLHDC4	KLRB1
OAS3		ALS2CR12	CKAP5	CLDN19	CBY1	PTPRN	PLXDC2	MAPRE2	PEAK1	UIMC1	NCAM1	HLCS	METTL2B	ACSL3	SNX10	APOBEC3F	KIAA1644	CLEC2D
FGD5		ALS2CR12	ZNF248	CCR6	FZD4	DNPEP	TMEM151B	C17orf105	DCAF17	UIMC1	PLEKHM3	SOSTDC1	DESI2	ACSL3	C12orf23	GDE1	SLC36A1	CLEC2D
C4orf52		STRADB	USP1	CENPL	ZNF148	DNPEP	BIRC6	SEMA3E	EIF5A2	UIMC1	MLEC	CDK19	RHOQ	KCNE4	CLPSL1	OXTR	PDPR	CLEC2D
EID1		STRADB	ZC3H7A	MAP3K15	CNOT6L	DNPEP	TBC1D12	COTL1	ZNF516	UIMC1	ZNF652	CHIC1	CDH11	SCG2	HMOX1	KIAA0240	OTUD6B	CLEC2D
KPNA3		C2CD6	SEC14L3	SOX13	ZNF704	DES	RUNDC1	AGAP1	RNF169	ZNF346	MAPK1IP1L	CSDA	POT1	SCG2	FAM133A	GNAT1	WARS	CLEC2D
EIF4B		TMEM237	ARID4A	PYURF	CAV2	SPEG	SLMAP	TUFT1	ELMOD2	ZNF346	SNTB2	ERMP1	CLDN11	WDFY1	MRPL44	EPB41L1	VDAC1	KLRF1
EID3		TMEM237	SLC26A7	RAB37	KRT76	SPEG	RAB14	KPNA3	TMEM245	ZNF346	BRWD1	CHAC2	ZNF318	WDFY1	SERINC1	NT5DC1	KLC1	KLRF1
RRP1B		TMEM237	ZBED3	SNX15	PTPN14	SPEG	VPS13D	RBM27	CCSER2	ZNF346	MED1	NPL	ZKSCAN7	SERPINE2	CSNK1A1	CSF1	GLS	KLRF1
HNF1B		TMEM237	PTPN4	BEST1	DNM3	LOC100996693	ATP13A3	ADIPOQ	FUT4	ZNF346	KBTBD8	FAM136A	CYP27C1	SERPINE2	HDX	PDZD2	ZFP91	CLEC2B
JHDM1D		MPP4	SNX1	DOK4	E2F2	TMEM198	GGA2	CTXN2	RTKN2	ZNF346	EP300	RRH	AGA	SERPINE2	SLC25A3	C8orf42	PGPEP1	CLEC2B
NEFM		ALS2	DUSP19	ZNF705G	MARF1	TMEM198	FOXP1	SEMA3D	PTBP2	FGFR4	GRID2	KRTAP4-4	NCOR1	SERPINE2	HIST1H2BJ	MFSD4	ANKFY1	CLEC2A
DDX31		CDK15	ZDHHC23	SAMD14	CADM2	OBSL1	PPARGC1A	MED9	ESRP1	FGFR4	PPP6C	GEMIN2	OTUD6B	FAM124B	RBBP4	SIN3A	SHANK2	CLEC2A
COQ10B		SUMO1	SLC25A24	ABCC1	MIB1	OBSL1	NUP133	MIER3	SLC25A27	FGFR4	ERLIN1	GTPBP4	VEGFA	CUL3	SLC22A9	KLF12	NUP58	CLEC12A
PSKH2		SUMO1	WBP2NL	IDUA	ESS2	OBSL1	CFL2	TMEM215	DCAF7	FGFR4	ASAP1	HPSE	SYT1	CUL3	RPL7	SUZ12	DMXL1	CLEC12A
KLHL28		SUMO1	STX2	DMC1	HS2ST1	SLC4A3	RYBP	TMEM164	FUNDC1	RAB24	KRT80	ARL6IP5	ZBTB33	CUL3	GDF9	FTSJ2	BZW1	CLEC12A
BLOC1S4		SUMO1	PRKRA	RSL1D1	TMEM167B	SLC4A3	SPATA2	DNAJA2	LRRTM3	RAB24	ZNF365	WISP3	GCOM1	CUL3	CHRNA1	ST6GAL2	PLPP3	CLEC12A
ZBTB11		BMPR2	CXCR2	IGDCC3	SLC38A2	EPHA4	TANC2	CENPP	ACVR2B	MXD3	FARP1	MXD1	ZNF207	CUL3	RGS2	FANCF	CHD6	CLEC1B
SLC25A5		BMPR2	EHF	ZNF114	EFNA5	EPHA4	SUV39H1	MINOS1	ING2	MXD3	ZNF281	NUDT4	MYF6	DOCK10	HYDIN	MTMR9	ARHGAP23	CLEC1B
KRTAP9-2		ICA1L	WNT10A	HS3ST1	JMY	PAX3	SUV420H1	TOMM20	PSD3	MXD3	GPC6	SNCA	NEDD4	DOCK10	GRK4	TTC24	SOX13	CLEC1B
RAP1B		ICA1L	RORA	MOB2	UBQLN1	PAX3	PTBP2	NAGA	IKZF2	GRK6	HEG1	PPP1R3A	ITM2A	IRS1	ABCA5	CD22	SCAI	CLEC1B
TULP4		ICA1L	EVI5	DLGAP2	MAPK6	SGPP2	UGCG	SLC16A14	IDS	GRK6	LIMK1	ADSS	PPM1B	RHBDD1	MON1B	TP73	TM2D3	CLEC12B
SLFN13		ICA1L	GEN1	QPCTL	KAT7	ACSL3	NFATC2	CLNK	SBF1	DBN1	MGA	SRSF2	PRDX3	RHBDD1	CGRRF1	PANX3	MACC1	CLEC12B
ZNF3		ICA1L	PTK2	RNASEH2C	RUNX2	ACSL3	KIF5C	GNG12	DLGAP2	DBN1	GABRB3	DNAH7	LRRC7	COL4A4	OVOL2	POU2AF1	ABCA1	CLEC12B
RPL22		ICA1L	CERKL	TMEM213	MYO10	KCNE4	ARHGAP35	GATAD2B	GOLGA8B	DBN1	ANGEL2	KLHL7	TBCK	COL4A3	TSC22D2	PPP1R2	PCDH17	CLEC9A
C2orf47		ICA1L	SLC10A2	LIPG	APAF1	SCG2	SPTY2D1	SPHKAP	EPS15	DBN1	RNF24	PRPF4B	THEMIS	MFF	CSRNP3	TECTB	ZNF746	CLEC7A
PCDHB10		NBEAL1	FAM43A	ZNRF1	PTPRJ	MRPL44	LMBRD2	PPP3R2	DOT1L	FAM193B	SYNJ2BP	RGPD5	HNMT	MFF	TRIM49D1	SMARCA4	BCAT1	CLEC7A
SNX10		CYP20A1	PLIN5	CEP41	DLC1	FAM124B	KIAA1210	CSF2RB	CLINT1	FAM193B	UBE2B	SPG20OS	FBXL3	MFF	TMEM196	TMEM52B	EPHA7	CLEC7A
ZPLD1		ABI2	NBPF3	TUSC5	SLC12A5	FAM124B	WEE1	KLF3	PIGM	B4GALT7	RGL1	YWHAG	TP53AIP1	MFF	GLRA3	FUNDC2	MAP7	CLEC7A
CTNNA2		ABI2	RAB27B	SOX6	STK4	CUL3	CLCN3	PPM1E	CYTH3	FAM153A	NFASC	KLK2	RBM24	MFF	AMMECR1	SLC35G1	GPNMB	CLEC7A
RBM11		ABI2	BRI3BP	NIP7	UBE4B	CUL3	SLC43A2	RNASEH2C	ARHGAP26	FAM153A	FBXW11	TRAM2	SERINC1	MFF	ONECUT3	VAMP7	TMCC1	OLR1
NCAPG2		ABI2	HAL	MPHOSPH8	RXFP2	DOCK10	RAB5B	DDAH1	ARID5B	FAM153A	DENND2C	LIMA1	PUM2	AGFG1	SHISA2	GALR2	AGPAT2	OLR1
GIMAP6		RAPH1	GCC2	LTBP4	GRIN2A	DOCK10	NIPA1	RASA3	GPC6	FAM153A	AKAP2	ZNF713	OIT3	AGFG1	SLCO1A2	DEK	TSSK6	OLR1
GID8		RAPH1	SERPINB10	ETS1	UBE2K	DOCK10	AFF1	CDON	BUD31	PROP1	KSR1	DNAJC9-AS1	AKT3	AGFG1	SUCNR1	FAM218A	NEB	OLR1
NME6		RAPH1	OGN	USF1	VAV2	NYAP2	USP32	BCLAF1	CLDND1	N4BP3	KDM1B	ARHGAP15	PIK3AP1	AGFG1	CAPN14	HIATL1	SYNGR2	TMEM52B
FKBP9		CD28	ARSE	MAPK8IP3	GAPVD1	NYAP2	RAB10	EIF2C1	CNST	HNRNPAB	ZFX	PPP2CB	PNO1	GABRA1	DISC1	ATP2B3	UBE2K	TMEM52B
DACT2		CD28	P4HA2	ARID5B	MAFG	NYAP2	ROBO1	CTLA4	WDR45B	HNRNPAB	ELAVL4	FAM46C	FAM216B	GABRA1	GPR89A	FGFRL1	CDK2AP1	TMEM52B
CAMK4		CD28	GTF2A2	C2orf56	ZADH2	IRS1	CNTNAP5	ZNF28	GDAP1	GRM6	NOTCH1	EFCAB13	TRIM59	GABRG2	FBXO16	WDR33	CSDE1	TMEM52B
ARMCX2		ICOS	CHIC1	PDGFB	KLF11	IRS1	ZNF704	LMBR1	CHST2	ADAMTS2	AAK1	GBP4	LIX1	GABRG2	AGAP4	ZFP41	SNTB2	TMEM52B
EPB41L4B		ICOS	DERL1	MIXL1	DSG1	COL4A4	ZFP3	RAB9B	HBS1L	RUFY1	CCNJL	ABCB5	PLCB1	GABRG2	ANO3	HOXB6	TOMM20	TMEM52B
NMUR1		PARD3B	ZNF799	HUWE1	IL1RAP	COL4A4	CUL3	LSM14B	PDE7B	RUFY1	PRRG4	AL138968.1	BFAR	GABRG2	ITGB5	ADM2	ABHD14B	TMEM52B
ZNF532		PARD3B	VSTM2L	TMEM67	FAM222A	AGFG1	PHF3	ADARB1	ELL	CBY3	NDNF	LHX8	TBC1D8B	GABRG2	ALX4	ITSN1	JADE1	GABARAPL1
TGIF2LY		PARD3B	SRPX	MGAT5B	SCML4	AGFG1	SH3PXD2A	HEY2	ZNF365	CANX	CEP97	P2RY13	FZD4	NUDCD2	FBXO40	GNA11	ELAVL2	KLRK1
ENPP4		PARD3B	RBM44	ORMDL2	NRSN1	AGFG1	SUB1	DMXL1	EDEM3	CANX	CHMP5	DLEU2L	SGMS1	NUDCD2	SOX1	C8orf82	BCOR	KLRC4
ATP13A2		PARD3B	DLAT	APOBEC3A	SGMS1	AGFG1	AKIRIN2	SRR	ANGEL2	MAML1	TCF4	RCAN3	AZI2	TENM2	RP11-766F14.2	SLC8A2	PPME1	KLRC4
DDX10		PARD3B	SERPINB11	SUN1	PPFIA2	GABRG2	WDR7	CEACAM6	SMURF1	TBC1D9B	AFF4	CPXCR1	RAB31	TENM2	SLC25A44	PHF15	GOT1	KLRC2
NUDCD1		PARD3B	SERHL2	LSM14B	STX16	GABRG2	BCL2L11	STEAP2	CCDC117	TBC1D9B	GPRIN3	MAGT1	ZFP90	TENM2	FAM208B	C14orf180	BMPR2	KLRC1
HMBOX1		PARD3B	UGCG	AC124890.1	SIRT7	GABRG2	SUGT1	PION	YME1L1	RNF130	BCL2	FBXL3	UNC13C	TENM2	TSNAX	ORAOV1	SYNJ1	KLRC1
TAF11		INO80D	CNNM4	RNF115	HCCS	GABRG2	EFNA5	TANC2	TMEM229B	RNF130	FNDC3B	RRAGD	MSI2	TENM2	TNRC6B	TPPP	TRIM23	EIF2S3B
RCC2		INO80D	ZPLD1	TMIGD2	NEDD4L	GABRG2	MECP2	SLC41A1	PPFIBP1	MAPK9	GRIP1	POU4F1	WIPF2	WWC1	PREPL	CYB5R3	SSU72	EIF2S3B
H2BFM		NDUFS1	KIAA1109	GID8	BHLHE40	GABRG2	GPT2	C20orf112	TOPORS	MAPK9	SLC5A3	ARHGAP32	FAM120C	WWC1	BANP	POU2F2	ABL2	EIF2S3B
IL12A		MDH1B	ELOVL7	SOX7	PNRC1	CCNG1	SOX5	DENND1B	ARID2	MAPK9	PLK2	ATP8A2	PPP1R3B	WWC1	MEGF9	DNAJC11	SF3B3	EIF2S3B
ACSM1		MDH1B	APEX2	CD27	PIK3CB	CCNG1	VAV2	GIN1	FBXO30	MGAT1	CLOCK	GLO1	UPK1B	WWC1	ITGB8	CLN8	UCHL5	STYK1
CCDC135		MDH1B	MCTP1	CYFIP2	PDGFD	NUDCD2	PRKD3	SPATA8	MIER3	BTNL9	THRB	POLR3G	PPP2R5A	SLIT3	TFAP2E	FAM107A	RBM38	STYK1
ZC3H15		FASTKD2	TMEM170A	TMEM47	RIMBP2	NUDCD2	CCDC88A	CCDC93	NUP35	TRIM7	RFX7	TMED4	MSMO1	SLIT3	DHFRL1	RAB3D	ATM	YBX3
CTBS		FASTKD2	KCNIP1	SERPINB10	NFIA	HMMR	FUBP1	AGBL1	ID2	TRIM7	AHNAK	MBIP	SCAF11	SLIT3	ETFA	NFE2L1	ABL1	YBX3
FAM76B		FASTKD2	CENPL	RAPGEF2	PTH	HMMR	MARK3	FOXD4L3	SCAF11	TRIM7	FAM178A	ZNF548	LTB4R	SLIT3	YWHAB	CLSTN1	PHF20	YBX3
CCDC50		METTL21A	GRIN2B	ADAMTS6	ARHGEF26	HMMR	TEX2	TRPA1	LY75	TRIM41	RAB3B	ZNF333	FXR1	DOCK2	SFSWAP	MICAL3	LRP8	YBX3
LMCD1		CCNYL1	ESR1	CELF2	TNFRSF1B	HMMR	SPRY4	ZNF620	ANKH	TRIM41	ANGPTL3	ATXN3	ZBTB43	LCP2	RNF113B	BOC	ARHGAP44	YBX3
ANKRD30A		CCNYL1	DDAH1	ERCC6L2	GALNT13	HMMR	N4BP1	ZNF788	MTERF3	RACK1	PALM2-AKAP2	CYP24A1	RGS18	LCP2	C8orf44-SGK3	LIPE	TIAM1	YBX3
DAPK1		CCNYL1	TMX3	LARP1	RPS6KA3	MAT2B	PHF12	SSX4B	ZFX	DUSP22	ST8SIA3	KIAA1462	ST6GALNAC3	KCNIP1	GBP1	ABCC6	ABCD3	TAS2R13
SYPL1		PLEKHM3	ZNF730	TRIM14	RFX5	MAT2B	NOVA2	C10orf40	SYS1	DUSP22	NACC2	CWC27	EPB41L4B	GABRP	RSBN1	CMKLR1	LIFR	TAS2R46
GYS2		PLEKHM3	FAM211A	ACSS2	NOV	MAT2B	SLC12A5	KDM6A	GPR146	DUSP22	ANO5	MORC3	PJA1	GABRP	OPN3	ABCD1	FAF2	TAS2R30
GINM1		PLEKHM3	CLVS2	MMP14	ZXDB	MAT2B	HOOK3	CLCN6	TAOK1	MYLK4	STYX	TMEM59	ASPHD1	GABRP	ATMIN	FAM125B	STAT5B	SMIM10L1
POU4F2		PLEKHM3	ADAM10	ZNF33B	SYNJ1	TENM2	OSBPL6	TECRL	OSR1	MYLK4	DHX9	STOX2	MAPK10	GABRP	CHST13	FBXL16	CNKSR2	SMIM10L1
SERPINB10		PLEKHM3	FZD8	S100A7A	ARF4	TENM2	PTGFRN	NDST3	ZYG11B	MYLK4	ROCK2	CD2AP	LRRTM4	STK10	PAK3	UROC1	WDR48	PRB2
KRTAP3-3		PLEKHM3	HERC3	KPNA1	RAB12	SLIT3	HHIP	LIPA	ZCCHC14	SERPINB9	NR2C2	TOP2B	RHOT1	UBTD2	YOD1	SH2B3	PRDM6	ETV6
NAP1L4		C2orf80	KATNBL1	PQLC1	SBNO1	KCNIP1	UHMK1	CASP2	MBLAC2	SERPINB6	MPRIP	TNFAIP6	MS4A7	SH3PXD2B	SMIM13	NAT16	ZNF236	ETV6
TEDDM1		C2orf80	TAS2R5	ALPP	PTGER3	KCNIP1	TMEM50B	TRIM48	NDST1	RIPK1	SPRED1	PLEKHF2	PCM1	NEURL1B	TCFL5	MYL9	NPRL3	BCL2L14
PATE4		IDH1	ZCCHC6	ARHGAP4	ZDHHC17	KCNIP1	TENM1	PWP1	ZFAND5	RIPK1	PLXNC1	AFTPH	ZCCHC10	NEURL1B	RPP14	KIAA0182	ARF1	BCL2L14
RAB27A		IDH1	TMEM38A	NME6	SGTB	KCNIP1	FAT3	BMPR1B	LPIN1	RIPK1	CDC27	HSP90AB1	TBCEL	NEURL1B	MBNL3	CLCN5	FZD4	BCL2L14
FBXO3		IDH1	ABCD3	RPLP1	CDK5R1	GABRP	KCNN3	DERL2	UCHL5	RIPK1	AUTS2	LUM	UXS1	ERGIC1	TGS1	EPS8L2	TMEM30A	BCL2L14
DSC2		IDH1	HTR5A-AS1	NCALD	VTI1A	GABRP	FYN	ZSCAN30	PI4K2B	TUBB2A	NUP153	PRKAG2	CCPG1	CREBRF	CCDC148	MXRA7	STC1	BCL2L14
TRIM49C		IDH1	XAF1	FAM127B	PBX3	RANBP17	ATG14	IRF2BPL	COMMD3	SLC22A23	SLC2A14	NAV2	MTMR9	CREBRF	SERPINB11	SLITRK1	WDFY3	LRP6
CCNDBP1		MAP2	CABP7	TRMT10B	PDE3B	RANBP17	ETNK1	SNRPD1	SDK2	SLC22A23	FBXL16	BLOC1S6	GLRB	CREBRF	STAP1	MAPKBP1	SGK1	LRP6
THUMPD1		MAP2	ZBTB2	IL2RB	RNF41	NPM1	RASD1	IKBIP	DOK5	SLC22A23	RIMS3	TBC1D12	CCT6A	STC2	C2orf83	PRKCE	UBE2Q1	BORCS5
TTC38		MAP2	RAB33B	SEMA3A	LARP4	UBTD2	IGF2BP1	TCL1A	CHSY3	SLC22A23	ETF1	SYT4	SATB2	CPEB4	EDARADD	WIPI2	BCAS2	BORCS5
INTS7		UNC80	TTK	DAP	MTMR1	SH3PXD2B	DICER1	CPEB4	B3GLCT	SLC22A23	PRPF38B	PRKCI	AKAP12	CPEB4	SEH1L	AC021218.2	RAB18	BORCS5
CDKN2D		UNC80	EFCAB14	EPSTI1	HIF1A	SH3PXD2B	TNPO1	TNS4	LYPLA2	PRPF4B	ANO6	ZBTB10	CYYR1	CPEB4	SLC25A2	RNF144A	ZBTB47	BORCS5
FBXO9		UNC80	SORBS2	ZNF699	MAP2K1	ATP6V0E1	USP46	MFHAS1	SNX13	ECI2	PITPNM3	FAM105B	CPM	CPEB4	C3orf35	LRIG1	NOTCH2	DUSP16
AHNAK		UNC80	HNF1B	NDST3	SUV39H1	CREBRF	MTF1	KRAS	FYN	ECI2	CAND1	PAX9	MCM10	CPEB4	ZNF24	HDLBP	FRMD4A	CREBL2
RBM27		RPE	ZBTB11	CEACAM1	NCKAP1	STC2	LAMC1	C11orf9	MPP5	ECI2	ARHGDIA	F2RL1	SORCS3	C5orf47	TMEM43	SLC20A2	CKS1B	CDKN1B
SCN3A		RPE	ZFC3H1	RTP1	NAP1L1	STC2	FMNL3	LPHN2	CDK12	ECI2	FRMD4A	MAPK9	NFATC3	SFXN1	ZFP1	SMAD2	PLEKHA6	CDKN1B
HNRNPR		RPE	PIWIL1	LINC00675	WDR7	CPEB4	FAM57A	HNRNPC	CSRNP3	LYRM4	KRR1	LRRIQ4	METTL2A	THOC3	FAM83B	RASGEF1A	EIF4A1	DDX47
NODAL		RPE	N4BP2L1	RRP15	PHACTR4	CPEB4	CNOT2	CD226	KDM3B	FARS2	MAFG	SH2D1A	DICER1	SIMC1	TRABD2A	C21orf49	SRSF6	DDX47
CACNG2		RPE	SLC2A13	CLDN16	ATP6V0E1	CPEB4	CBLB	NCOA1	TBX22	FARS2	ERN1	DSG3	SCN3B	KIAA1191	TMEM245	CYP1A1	UBASH3B	DDX47
ESM1		RPE	ARNTL	STXBP4	GGA2	NSG2	BLCAP	HMP19	GLRA2	FARS2	CDH7	CDC14B	RANBP2	KIAA1191	PLCXD3	FLRT2	ENSA	DDX47
RIOK2		RPE	ACPP	C3orf27	RIMS1	SFXN1	ADCYAP1	GREB1	ARPP21	F13A1	MYO9A	KIAA1841	GALNT1	KIAA1191	GJA5	LRFN1	SNX16	GPRC5A
PLEKHB1		RPE	ZNF485	TRPA1	KIF1B	CPLX2	RPRD1A	SHQ1	PM20D2	SSR1	SLC30A10	STK17B	RRH	HIGD2A	SEP15	LRRC33	PLEKHM1	GPRC5D
C11orf92		RPE	CDK6	GIMAP8	HECTD1	CPLX2	FZD3	EIF2C4	SGPP1	SSR1	KIF26B	ZNF45	TNPO1	FAF2	TPK1	GRAP2	LCORL	GPRC5D
PFN2		RPE	TRHDE	POLDIP3	KDM7A	CPLX2	FAM20B	AFP	PTPN22	SSR1	PMPCB	RPRD1A	COG5	FAF2	ASPN	SEMA4F	PAX5	GPRC5D
MMGT1		KANSL1L	DGKE	EFNA2	DDX17	CPLX2	CCDC9	TXNDC12	NEK9	SSR1	MKL2	OSBPL8	GNA13	HK3	FEZ1	CREB3L3	SNAP25	HEBP1
FABP4		KANSL1L	PDE8A	SNX10	KLHL15	KIAA1191	TFCP2L1	BCL6	SP1	DSP	ARID5B	LIN7A	EVI5	ZNF346	CDH6	IGF2BP2	TWF1	FAM234B
ADD3		KANSL1L	KIAA1958	ZNF425	CHRM2	KIAA1191	PDE5A	EYA2	ACVR1C	DSP	SEPHS1	GAB1	RNF11	ZNF346	MAP3K5	JAM3	RPL37	FAM234B
MYO3B		KANSL1L	ARL16	ZNF429	G0S2	KIAA1191	WDFY2	HIVEP2	GOSR2	SLC35B3	AGO2	FAM19A1	DNAJC19	ZNF346	SLC25A15	SLC12A3	ZFP36L1	FAM234B
LTN1		LANCL1	ANP32A	EPB41L2	HFM1	KIAA1191	RPS6KA3	COQ10B	OSBPL8	TFAP2A	ZBTB8B	ZDBF2	UBA6	FGFR4	KCNE4	HSPA9	TREML2	GSG1
C11orf39		LANCL1	CYP4Z1	WNT5B	C5orf24	KIAA1191	VPS13B	RP11-297M9.1	UGCG	TFAP2A	CELF1	C17orf51	SLC4A4	FGFR4	ITCH	LCMT1	SDCBP	GSG1
PEX5L		ERBB4	MYEOV	RPS23	CSDE1	ARL10	CDC73	FAM180A	FBXL17	MAK	C1orf131	SLC35D3	PLCXD3	FGFR4	F8	KIF1A	NAA15	GSG1
NT5C3		ERBB4	C1QTNF7	FBXL17	COX8C	FAF2	SCML2	ZNF185	MARF1	MAK	ATXN1L	SEC23A	ARHGAP19	FGFR4	GPRIN3	MLL	ANAPC16	GSG1
C2orf73		ERBB4	OLA1	NODAL	SLC4A7	RNF44	DNAL1	FCGR2B	APPL1	MAK	LATS2	N4BP2	UBE2G2	NSD1	PTPN14	SLC25A44	HIF1AN	GSG1
SCN9A		ERBB4	AGPAT6	TAGLN2	CALB1	GPRIN1	FAM53B	EMP2	LYSMD3	MAK	PARD3B	RAB14	TRUB1	NSD1	PLS3	RP11-247C2.2	UBE2N	GSG1
LEMD3		ERBB4	FAM120C	AQP11	SATB1	UNC5A	CREB5	WNK1	CDCA4	GCM2	FAM63B	PIK3C3	ARF6	NSD1	ENAH	GRID1	MLLT10	GSG1
GIMAP1		ERBB4	MAT1A	AC110373.1	AFF3	UNC5A	UBE2D3	IRS2	HIPK3	RAB6B	SORT1	LTF	TEDDM1	NSD1	ZNF365	ZNF467	GOLGA1	GSG1
CA3		IKZF2	BBS4	KIF5C	KIF16B	FGFR4	DYRK2	ADAMTS6	FAM120C	SLCO2A1	PTAR1	PTPRB	KLHL42	RGS14	GNG7	ARSD	CFAP74	GSG1
RABL3		IKZF2	PSG4	C20orf112	FAT3	FGFR4	ZFYVE26	HERC4	ERBB4	RYK	ERGIC2	TEP1	SKAP2	SLC34A1	TSLP	TRIM35	CYB5B	GSG1
RWDD4		IKZF2	RWDD2A	HOGA1	XIAP	FGFR4	KCNJ6	C5orf22	MTMR9	RYK	CTBP2	AP4S1	MBIP	FAM153A	DDX47	GATAD2A	MED12L	GSG1
ZG16		IKZF2	MAPK1	TSPAN9	PDE1C	FGFR4	ZBTB7B	MMGT1	ONECUT2	AMOTL2	PLXNA2	GABRB2	PJA2	FAM153A	ATXN7L3B	KIAA1210	HSF2	GSG1
ATF7IP2		IKZF2	SPRTN	ANO6	SLC39A12	FGFR4	SMURF2	SPTY2D1	SHROOM4	AMOTL2	GDNF	MKNK1	RAPGEF4	GMCL2	IL7	TRIB1	ALKBH3	GSG1
NRBP2		IKZF2	TRIM8	HS3ST4	LPGAT1	FGFR4	VAPA	MIA3	HAS2	AMOTL2	PLXNA4	PRDX3	NAIP	LOC102724657	MRPL50	ELAVL4	TMEM50A	GSG1
ATP2B1		IKZF2	FAM107A	FAM106A	ERC1	FGFR4	CCSER2	HNF1B	PDLIM5	KY	GNA13	ST8SIA4	LRAT	ZFP2	GABRE	IER5	DNAJB1	EMP1
HFE2		SPAG16	AC026703.1	STARD10	BMP6	FGFR4	SOCS2	CEACAM7	EXOSC3	EPHB1	ATF7IP	SVIP	ETS1	ZFP2	SEMA3E	MRAP2	KBTBD8	EMP1
RP11-366L20.2		SPAG16	PNLIPRP3	RASA4	ESCO2	NSD1	PPP2R5E	CEBPA	FIGNL2	PPP2R3A	KIAA0430	COG3	NRK	CANX	RMDN3	FAM18A	TACC2	GRIN2B
SFXN3		SPAG16	ZMAT3	SCAMP2	RAB10	NSD1	PKDCC	IREB2	PELI2	PPP2R3A	A1CF	PPP1R3B	NBN	MAML1	RBPMS	POU5F1B	MIPOL1	GRIN2B
CSRP3		SPAG16	SLC25A51	PER1	DST	NSD1	TARDBP	FAM184A	SOAT1	PPP2R3A	SLC4A4	MANEA	THAP2	TBC1D9B	TPD52L2	KAAG1	ADAMTS6	ATF7IP
C5orf47		VWC2L	SPEF2	CETN2	GGA1	NSD1	BAZ2A	ADO	SLC1A1	MSL2	MCC	AC073346.2	TXNRD1	TBC1D9B	TUBB6	TSPAN18	ZSWIM4	ATF7IP
SOBP		VWC2L	CEP19	TMEM150C	KCNK10	NSD1	RXRA	OSR1	SCN9A	MSL2	MAF	PWWP2A	WASF3	RNF130	FAM104B	STYX	CAMK2N2	ATF7IP
MAT1A		BARD1	MAGEA10	TMC3	IER5L	NSD1	CCNA2	SEPP1	PSPH	MSL2	TAF4	KIAA1024	CLOCK	SCGB3A1	WHSC1L1	PDX1	PHLPP1	ATF7IP
ZNF808		BARD1	NMUR1	VSTM4	COL4A4	PRELID1	ELL	C2orf80	PAK6	PCCB	BRWD3	C1orf88	URB1	FLT4	LYZ	OVOL1	CHST3	ATF7IP
AP000679.2		ABCA12	NAP1L6	RP11-625H11.1	CAPRIN1	PRELID1	RMND5A	HSPA12A	PDCD4	PCCB	WDFY2	CDC42EP3	TRMT5	BTNL9	SNRPB2	CCDC125	AHRR	ATF7IP
RPS4XP21		ABCA12	KHDRBS1	SLC25A29	PCDHB4	MXD3	SAR1B	VAMP4	PLXNA4	STAG1	CDK12	C3orf70	VAV3	BTNL9	LRIG2	UBE2G2	MAP4K3	ATF7IP
PPP3R1		ABCA12	HIST1H2BC	SEC14L4	SLC4A5	MXD3	COL9A3	EXOC2	INTS6	STAG1	ZCCHC14	C6orf228	DLGAP1	TRIM41	ME2	DLG1	QSER1	ATF7IP
TBC1D15		ABCA12	TRIM2	NSRP1	BCAT1	SLC34A1	ERP44	RIPPLY1	KBTBD8	NCK1	CBX5	SYDE2	NFIX	TRIM41	ATRX	GCSAML	MAP3K1	ATF7IP
FAT3		ATIC	SKIL	VCP	RASSF2	GRK6	C11orf57	TECTA	WNK3	NCK1	UBE2R2	MDM4	WASF2	TRIM52	RPL23	LY9	FOXA1	ATF7IP
LGR6		FN1	KIAA1429	TUBB4A	TWF1	DOK3	NUFIP2	RWDD4	SLC30A5	CLDN18	ZNF516	PTPDC1	C5orf51	DUSP22	SLC4A7	CPLX2	SOBP	ATF7IP
CYB5R4		FN1	NARS2	MRP63	CCND3	DOK3	SRSF7	LHFPL3	IGF2R	CLDN18	ABCA1	SLC30A1	APBB2	EXOC2	HSPA2	ZNF555	LIG1	ATF7IP
OR4C13		FN1	CASQ2	GLE1	NUFIP2	DDX41	LIMD2	IBTK	RBSN	DZIP1L	ERBB4	PCDHA8	PIP5K1B	EXOC2	ARPP19	FAM149B1	CACNA1C	ATF7IP
HCRTR1		FN1	CASS4	YEATS2	SRPK2	FAM193B	RBFOX2	PLEKHH1	FBXW2	A4GNT	ARHGEF1	PCDHAC2	RBPJ	MYLK4	LPGAT1	MITF	NTN1	PLBD1
RORB		FN1	SLC9A6	TBX3	MFSD14A	FAM153A	ALG14	ALDH6A1	SHOC2	DBR1	CHSY3	NFIA	TGFBR3	WRNIP1	SLC7A13	DGKA	MMS22L	GUCY2C
LSM5		FN1	KCNC3	HDAC2	ENPP6	NHP2	SEC31B	ZNF563	SOX6	DBR1	EMB	COL10A1	PIEZO2	WRNIP1	C6orf195	PPARA	CERS6	GUCY2C
AGAP1		FN1	EIF4EBP2	JHDM1D	RBM20	NHP2	CSNK2A1	NAPEPLD	KIAA0040	ARMC8	ZNF395	JAZF1	RPRD2	WRNIP1	KRCC1	RGS7	LARP4B	HIST4H4
PLS3		FN1	AC127496.1	WFIKKN2	CDKL2	ZNF354B	RNF213	FASLG	CREBBP	ARMC8	LRIG1	TMOD2	RMDN1	NQO2	WWC3	UBE4B	HMGA2	H2AFJ
TFRC		FN1	ENTPD7	FGF7	ZDHHC7	ZFP2	ACVR2A	C1orf64	COPS2	ARMC8	HIVEP3	EDEM3	FAS	NQO2	N4BP2L1	EHD2	CDYL2	WBP11
PWP1		FN1	CKAP4	MYO5A	DIP2C	GRM6	UBE2D2	CA12	TMX1	NME9	SH3PXD2A	FAM133A	EFNB2	NQO2	RP11-322L20.1	STON1	FAM222A	C12orf60
APPL1		FN1	HSP90AA1	RASA3	PARP1	ZNF354C	VGLL3	TFCP2	KLF3	NME9	NCOR2	SPRED1	DDAH1	NQO2	SOS2	SHANK2	NR4A3	SMCO3
TMEM150C		FN1	KLHL20	C8A	PHC3	ZNF354C	ZNF711	ZZZ3	CCSER1	NME9	ATAD2B	TMED8	NCKAP5	SLC22A23	C9orf38	ONECUT2	CPNE8	SMCO3
C1orf198		FN1	MROH1	CXorf59	ATP12A	RUFY1	GBX2	RABL3	TPCN1	NME9	PAQR5	SWAP70	GOLT1B	SLC22A23	CSTF1	CHRM2	KANK2	ART4
HNRNPC		FN1	CAPRIN1	GOLT1A	RUFY2	RUFY1	GNPTG	CD34	ZC3H12C	ESYT3	FAM179B	SREK1IP1	SFRP1	SLC22A23	CDC42SE2	PPM1F	CD276	ART4
CSNK1A1L		FN1	RBM28	GAD2	MAP3K5	RUFY1	SIK2	QDPR	SATB2	ESYT3	BICD2	ATP5E	GPCPD1	PRPF4B	DIAPH2	PRRG2	THBS2	ART4
RNF121		FN1	NR1D2	ARID3A	NRAS	HNRNPH1	PXMP4	FGF18	WSB1	CEP70	MEX3D	BNIP2	BZW1	PRPF4B	PTPMT1	MEF2C	SLK	MGP
HLA-DOA		FN1	RAD23B	ITGB8	NIPA2	CANX	CAST	BRMS1L	RNF13	CEP70	PCDH19	PTPRG	PPP2R5E	PRPF4B	KIAA1468	ZFP2	NELL2	MGP
OR11A1		FN1	ATP9A	SESTD1	SCAF11	CANX	INTS8	UNC13B	PKP1	PIK3CB	STXBP6	CEP63	CYBRD1	FAM217A	AL031663.2	RSF1	FBN2	ERP27
L2HGDH		MREG	PRRX1	SLC1A3	SRSF10	CANX	MBD2	GYS2	APLP2	PIK3CB	TBL1XR1	B3GNT2	SMAP2	FAM217A	CACYBP	TMEM132D	PCSK6	ERP27
HBS1L		XRCC5	SFXN1	RC3H1	GNPTAB	MGAT4B	TCIRG1	RAB27A	RPS6KA2	PIK3CB	HIPK2	TOPBP1	TRIM34	C6orf201	TMEM174	CCNG2	EPB41L5	ERP27
SYT10		2020-03-04	ALG6	DOC2A	GRM5	MGAT4B	FAM216A	UBE2A	PLXNC1	PIK3CB	GPR63	CCNT2	TRPC3	ECI2	TMSB4Y	TOR1A	USP14	ERP27
HTN3		2020-03-04	FABP4	RABL3	ACVR2B	RNF130	PPP6R2	CDK1	ARL3	PIK3CB	GIGYF1	DMRT1	AMMECR1	ECI2	MEX3C	C10orf114	MFAP3	ARHGDIB
TRAF3		IGFBP2	MRPL35	CACNA1D	PRR14L	RNF130	WNK1	SBNO1	CDK13	PIK3CB	PVRL1	MEGF9	GPC6	ECI2	CTNNA3	SMAD4	FAM53B	ARHGDIB
RNPC3		IGFBP2	AJUBA	SCN4B	FNBP1	RNF130	PCYT2	MYBL1	STK38L	FOXL2NB	USH1G	LEPROT	TMCO3	ECI2	FAM19A1	ANKS3	OTX1	ARHGDIB
PAQR8		TNS1	CS	ZNF790	PNPLA6	MAPK9	GPR174	MNX1	ATP2B1	FOXL2NB	ABCC9	FAM199X	EDARADD	ECI2	ALDH1A1	ERP27	PRPF3	ARHGDIB
GOSR1		TNS1	MFSD5	CELF2-AS1	N4BP2L2	MAPK9	HOXB2	TP53INP2	SLC35A2	PRR23A	SLC6A17	ARPP19	USP33	CDYL	MSTN	RECQL	ATP7B	ARHGDIB
DIDO1		TNS1	TMPO	HNRNPC	ARGLU1	MAPK9	NCKAP1	TAT	CUL5	COPB2	AMBRA1	VCPIP1	RABGAP1L	LYRM4	KL	NAA30	CNN3	ARHGDIB
LAPTM5		TNS1	PPIG	LRRC4	TRIM23	MAPK9	WNT1	PTCH1	SURF4	NMNAT3	PPP2R5C	INO80D	RC3H1	NRN1	OCEL1	PEX10	SIM2	ARHGDIB
ZMAT3		TNS1	SNTG1	PDE7A	LIX1	MAPK9	DGCR14	DYDC2	SLC35F5	NMNAT3	JAKMIP3	ICK	FBXW2	NRN1	CHRNA9	SSX2	POLR3F	ARHGDIB
GJA3		TNS1	DPYSL3	RCC2	FAM53B	MAPK9	ZBTB20	ARID5B	VAPA	NMNAT3	REL	DOK6	FOXK2	F13A1	CLCA4	FAM116A	PPHLN1	ARHGDIB
C1D		TNS1	ESD	DMPK	PID1	GFPT2	SND1	UBFD1	MTAP	NMNAT3	GREB1L	XIRP2	RGS2	RREB1	CYP3A5	OBSCN	BARD1	RERG
SLTM		TNS1	SKA3	VPS37C	GABRB2	FLT4	CSMD1	FAM69A	CUL4A	NMNAT3	CUL5	CA8	SYT14	RREB1	FAXC	AL356356.1	CXXC4	RERG
MRPL38		TNS1	NEK7	ATG7	SACM1L	FLT4	SLC25A26	SMAD6	CTSC	NMNAT3	USH2A	POLI	PRR14L	RREB1	VBP1	TRIOBP	AGTRAP	PTPRO
TBX3		TNS1	ZNF497	SIK3	TMED7	FLT4	NRD1	URB1	BCAP29	NMNAT3	DFFA	CHRM3	CBLL1	RREB1	SGK3	GDF7	FGD1	PTPRO
AICDA		RUFY4	LEMD3	ETNK2	EPHA7	FLT4	COL19A1	ZNF324B	2020-09-08	CLSTN2	GSE1	RBMS1	SMCO4	SSR1	CCDC68	TMEM204	SATB1	EPS8
WASF3		CXCR1	MS4A1	MYADML2	RDX	ZFP62	GRIN2A	AC110619.2	MAP2K5	CLSTN2	IPO8	ANKRD12	DLGAP2	SSR1	PANK1	KIAA1143	C6orf106	EPS8
CLEC3A		CXCR1	KLHL23	RAB35	C2orf15	ZFP62	SERPINH1	ADD3	IFIT5	TRIM42	GOSR2	PRLR	TRNT1	SSR1	ZC2HC1A	CYGB	DTNB	EPS8
MSTN		AAMP	FAM172A	U2SURP	GABRA1	ZFP62	ZNF652	FZD10	TMEM154	SLC25A36	ZC3H4	CHML	LIMCH1	SSR1	PPP2CB	PALM2-AKAP2	PEX3	EPS8
OLA1		AAMP	ZNF573	DDAH1	MACROD2	BTNL8	SHC3	PDCD4	RAB23	SLC25A36	EED	C9orf41	SESN3	SSR1	LITAF	CEND1	JCAD	EPS8
HFE		TMBIM1	FAM76A	FAM92A1	MGAT4A	TRIM7		C9orf66	DCDC2	RASA2	FAM46C	ZBTB44	DRAM2	SSR1	ANGPT2	IPO5	GJC1	DERA
CLNK		TMBIM1	UBR3	TECRL	BEX3	TRIM52		OR51E2	PATZ1	RASA2	ARHGAP26	GABPB2	ZC3H12C	CAGE1	ZNF506	PTPN21	RHOB	DERA
FAM122B		CATIP	SYNCRIP	MYO3B	MATN3	TRIM52		ZNF891	CHM	GRK7	SUZ12	GATAD2B	CNTN4	RIOK1	TPD52L3	C1orf212	ISLR2	DERA
PACSIN1		SLC11A1	CYP7B1	TIGD5	SOX11	OR4F3		YIPF5	CDR2L	TFDP2	DCUN1D3	SOX6	MAP4	DSP	SDCCAG8	IP6K3	ANKRD24	DERA
ZNF235		CTDSP1	KCNH5	AACS	THOP1	IRF4		KRTAP13-4	ACTC1	TFDP2	SIAH1	RC3H1	PRELID3B	DSP	TNKS	ZNF462	GAPVD1	DERA
KDM4C		CTDSP1	MPP7	DDX26B	HADHA	IRF4		GRIK4	USP31	TFDP2	ONECUT2	GOSR1	ERBIN	DSP	PTPRG	AC007731.1	PAK1	SLC15A5
SLC30A9		CTDSP1	MRO	MAN1A1	ADCYAP1	IRF4		TBP	SNX16	TFDP2	NTPCR	EMP2	TMEM237	DSP	ZNF132	AIFM3	PRDM13	SLC15A5
RERGL		VIL1	FNBP1L	CASP2	KCNA1	FOXF2		B3GAT1	NEO1	TFDP2	PPP1R9A	FOXN3	SYT6	TFAP2A	LCMT2	NTN1	ANKS1A	SLC15A5
MORN2		USP37	TLK1	ZNF532	SEMA3A	FOXF2		SS18L2	TRA2B	TFDP2	FRMD5	STK4	RNF103	TFAP2A	KIAA1551	TOR4A	UBA3	SLC15A5
CHCHD4		USP37	DIP2B	BCL2L13	PLEKHB2	FOXF2		NDUFB6	GPR85	TFDP2	ACVR2B	STK10	PSME3	TFAP2A	SETDB2	SLCO3A1	TTN	MGST1
HLA-DPA1		USP37	RPA3	MYH10	CXCL6	MYLK4		CDC42BPG	ASXL1	TFDP2	ELL	EIF3F	CLINT1	GCNT2	TAS2R10	SKI	FHL1	MGST1
KCNMB2		USP37	FGD2	MTMR14	PKN2	MYLK4		LRP1	TSPAN13	GK5	TRIM71	ADIPOQ	COL19A1	C6orf52	PPP1R3B	IL17REL	MIER3	LMO3
CCNJ		USP37	TACR1	RNF121	STK38L	MYLK4		RCSD1	MMS22L	XRN1	ANKRD52	TMEM213	SLC27A6	C6orf52	DTD2	EGR4	ZDHHC9	LMO3
ANO6		CNOT9	AVPI1	MS4A7	TXLNB	SERPINB6		BTG1	NAMPT	XRN1	TPCN1	DRAXIN	SLC6A15	PAK1IP1	ROCK2	IQSEC3	ATP13A3	LMO3
RUNDC3B		CNOT9	KIAA1009	WDR52	CDK2AP2	TUBB2A		RAPGEF1	SRI	XRN1	CEP350	USP37	ETFA	MAK	KLHL11	HOXA3	PTTG1IP	LMO3
PINK1		PLCD4	SERF1A	OAS3	N4BP1	TUBB2B		TAF11	TXLNG	XRN1	PSME4	WDR52	RAB11FIP1	MAK	AC004899.1	ARC	STAT1	LMO3
CASC4		BCS1L	SERF1B	MON1B	ZHX1	TUBB2B		TTC3	FAM169A	XRN1	PAK3	SBNO1	CADM2	MAK	SLC26A2	ESPN	AFF4	LMO3
SKA2		BCS1L	GEM	GOSR1	RUNDC1	SLC22A23		ATP5G3	ELK3	XRN1	UHRF1BP1	PAWR	RBM41	MAK	EPHX3	PTDSS1	TPM3	LMO3
DAB1		BCS1L	ESM1	CTD-2192J16.17	NUDT10	SLC22A23		YEATS2	PPP1R2	XRN1	JMY	ZMAT3	NAV3	SYCP2L	SEPT10	AC007405.2	FNDC3B	LMO3
TACC1		BCS1L	ARMC1	PSMG1	SRPK1	SLC22A23		SYNC	PTAR1	XRN1	SYNCRIP	ARL5A	CDON	CDV3	SNAP25	GALNT2	SNX25	LMO3
AKAP10		BCS1L	CCDC14	PPFIA2	HMGA2	CDYL		PARVG	RNF145	PLS1	SMURF1	GIPC3	DAB2	CDV3	MAATS1	PPARGC1B	HS2ST1	LMO3
PANK1		BCS1L	NDUFA5	SMARCE1	EDEM1	CDYL		DUSP7	OTUD6B	PLS1	UBE2J1	ERLIN2	BCL2L14	CDV3	RAB8B	LRPAP1	SARNP	LMO3
AC022692.1		BCS1L	FLRT2	RP11-770J1.4	ANGEL2	CDYL		ANKMY2	TMEM26	PLS1	SENP5	REPS2	WWC2	CDV3	DEDD	JUP	SORCS3	SDCBP
OR4F21		RNF25	ERMP1	TBP	GTPBP10	LYRM4		XYLB	ARRDC3	U2SURP	USP31	RAPH1	ELAVL2	CDV3	ZNF730	C19orf25	MAPK1IP1L	SDCBP
NGLY1		STK36	AC006455.1	ZNF25	CDC14A	F13A1		SUMO3	MOSPD2	U2SURP	RNF11	IGFBP5	ARL1	CDV3	GLRB	PANK4	DNAJC4	SDCBP
NIPA1		STK36	DNAJA4	PLSCR5	SLC24A2	LY86		WDR72	PIM2	U2SURP	PDE7B	PCNX	ZNF507	CDV3	SH3BGRL2	FAM59B	TMEM132D	SDCBP
ABCA8		STK36	EPHA7	DAPL1	MBNL3	RIOK1		ARPC2	TNKS2	U2SURP	NUFIP2	RGS16	NUDT16	CDV3	SLC6A14	MMD2	UBR5	SDCBP
RAPH1		STK36	SLC38A9	OGFOD2	ITSN1	BMP6		RBAK	LYRM2	CHST2	ADCY9	TULP4	KCTD21	CDV3	NOX5	FAM83F	SSX6	NSMAF
CYP2E1		TTLL4	ARID5B	C17orf96	IPO9	BMP6		ZNF506	SPTBN1	CHST2	ZNF148	MMAB	SORCS1	TOPBP1	ST8SIA3	MSC	SRP19	NSMAF
SPHKAP		TTLL4	UBXN10	USP2	RICTOR	TXNDC5		C2orf56	CACNB2	C3orf58	KCTD16	VAMP2	RAB11A	SRPRB	MARCH1	LMF1	RBMS1	NSMAF
PDIK1L		TTLL4	ZXDA	RRP1B	ASAP1	SLC35B3		PBX3	INO80D	C3orf58	MOCS1	GAD2	PARP16	SLCO2A1	PBK	IKBKB	OPA3	NSMAF
RSL1D1		TTLL4	TRMT10A	CORO2A	KIAA0319L	TFAP2A		AC005481.5	DDIT4	C3orf58	DYRK2	CPEB4	KIAA0319	AMOTL2	CD28	C1orf21	SLC7A2	TOX
GABPA		CYP27A1	CCDC68	SKA2	FAM35A	GCNT2		VIP	TROVE2	PLSCR2	RBBP8	C11orf87	SLC7A6	AMOTL2	TET1	OTP	B3GALT6	CA8
RPF2		PRKAG3	GNAQ	ITPR2	ZNF131	GCNT2		NARF	CDK19	AGTR1	JAG2	ARID3A	RAB27B	AMOTL2	THEMIS	ANGPTL2	PER3	CA8
SLFN5		PRKAG3	ZNF576	NAT14	C1D	GCNT2		CACNA1D	ADAM12	HPS3	TRPM3	TSHZ2	EN1	AMOTL2	SLC28A3	GFRA1	CAV2	ZSCAN2
MAFK		PRKAG3	MBL2	POU4F2	FAM78A	GCNT2		ARSK	MED1	HPS3	AVL9	ZNF831	TMEM59	CEP63	SYK	NACC2	GJA1	ZSCAN2
SERAC1		PRKAG3	UBE2W	KCNH8	SYNM	GCNT2		TUBGCP3	FSIP1	HPS3	CNNM2	ETS1	ARID5B	CEP63	DLGAP2	AC010336.1	NAV2	ZSCAN2
CCDC82		FEV	GNAI3	PDE4DIP	AXIN2	MAK		TIGD6	MBNL2	HPS3	TMEM136	LARP1	RICTOR	CEP63	ATRN	FOXD3	SH3BP2	ZSCAN2
GOLGA8A		CFAP65	KB-1507C5.2	HLA-DOA	PXK	MAK		C9orf38	GRIP1	CP	ST3GAL2	BVES	DRG2	CEP63	NYAP2	FOSL1	HUS1	ZSCAN2
TXNDC16		CFAP65	WDR36	SDHA	HADHB	MAK		GREM2	TMEM189-UBE2V1	CP	NDST1	TFCP2	THRB	CEP63	SNX18	RASSF4	POU4F1	ZSCAN2
DUSP19		NHEJ1	CCND3	BNIP1	MAGI2	MAK		RPF2	PPP2R1B	TM4SF4	NRP2	OPCML	FAM43A	CEP63	TMEM52B	DDOST	ZER1	NMB
CLEC1A		NHEJ1	SLMO2	GSTM2	RAD51B	MAK		ZNF491	CREBZF	WWTR1	SCN2A	USP2	CCDC88A	CEP63	FZD4	SCCPDH	MTRR	NMB
EPHA7		SLC23A3	ZNF562	PTPRE	TEX261	CDV3		IARS2	CACHD1	WWTR1	KDM3B	SLC12A5	FBXL19	CEP63	GPR182	ATXN1	AGFG1	SEC11A
CA5B		SLC23A3	TEDDM1	ZNF71	NEK9	CDV3		PDC	SLC2A3	WWTR1	KCNQ4	KIAA1614	LRPPRC	KY	ASAH2	PCGF3	ZNF629	SEC11A
ZNF33B		ABCB6	C15orf62	MUC17	REPS2	CDV3		ZNF143	SYT10	WWTR1	SMAD7	C20orf112	FAM196A	KY	PCDH17	CLCN4	SERPINB8	SEC11A
REPS2		ABCB6	RANBP3L	MAP9	PIANP	CDV3		ADAL	XRN2	ANKUB1	MPP5	TNRC6B	C10orf76	EPHB1	EDA	TAC4	GATA2	SEC11A
LECT2		ABCB6	STK4	EPHA7	S1PR2	CDV3		MPHOSPH8	CHSY1	ANKUB1	TLN1	SEMA3D	RBBP5	EPHB1	C3orf33	VASP	NEMP1	SEC11A
PTGR2		ATG9A	NCAM1	C11orf9	PAFAH1B2	CDV3		ATP2B1	GABARAPL2	PFN2	SCN5A	AK1	CRTAP	PPP2R3A	ZBTB43	WDR82	PBX1	SEC11A
POGK		ATG9A	FDXACB1	CLPX	SH3PXD2A	CDV3		VWA8	RDX	MINDY4B	IL6ST	INHBA	PAPOLG	PPP2R3A	ASB4	LHX1	N4BP1	SEC11A
CCND2		DNAJB2	CELF2	UBAP2L	KCNA4	CDV3		GTF3C2	MFHAS1	MED12L	PHF12	B3GNT7	SKA3	PPP2R3A	NUS1	NSD1	SLITRK1	SEC11A
OR51E2		DNAJB2	TSTD2	ZNF367	TSPAN18	CDV3		WNT8A	SLC7A11	GPR87	IQSEC2	ENPP1	ENPEP	NCK1	NFXL1	C22orf46	EXOSC2	SEC11A
CSTF2T		PTPRN	ACER3	C3orf37	PLLP	CDV3		LEMD3	SHPRH	IGSF10	DCAF7	CCND2	APAF1	NCK1	PLCB1	DDTL	TASP1	SEC11A
DNAJC6		PTPRN	PPP3R1	MMAB	TNFSF10	CDV3		PEX5L	CDC42EP3	AADACL2	SOCS6	FOXO1	KCNE4	NCK1	SLC24A2	STK25	RYBP	SEC11A
ITGAV		PTPRN	GABRG2	ALCAM	PDE5A	SRPRB		KCTD9	SETD7	SUCNR1	CHD9	C11orf72	RGPD6	NCK1	SSMEM1	EZR	PHF6	SEC11A
FAM92A1		PTPRN	APP	LTBP2	PCGF5	RAB6B		TIMM17B	GOLGA8A	SUCNR1	ERC1	FAM217B	CHST1	NCK1	RFWD2	NUFIP2	RHOJ	ZNF592
MEGF10		PTPRN	FGF23	DSC2	LSMEM1	RYK		STAT1	MGEA5	MBNL1	SLC6A6	RAB9B	BCL2L1	NCK1	KCTD13	PSMB2	FMO1	ZNF592
KIAA1257		PTPRN	FCRL4	PHF16	ZBTB7B	RYK		DDHD2	PLCXD3	MBNL1	PROX1	SLFN13	INTS6	CLDN18	PMAIP1	TMEM178B	TNFRSF10D	ALPK3
FIGN		PTPRN	NBPF1	MLEC	ZNF275	ANAPC13		NPNT	RRP15	MBNL1	TUBB	ARID5B	KSR2	CLDN18	RBM12B	RAX2	KLHL29	SLC28A1
GRIK3		PTPRN	LSM14A	DKK1	LMBR1	EPHB1		PPP3CB	SCP2	MBNL1	UBXN7	HS3ST1	SRSF6	CLDN18	ENPP5	ZNF608	HCFC2	SLC28A1
SLC30A4		RESP18	CPD	BMPR1B	ZBTB41	PPP2R3A		OLA1	ZNF662	RAP2B	USP47	MIA3	TMEM45B	CLDN18	KBTBD2	KIAA0319L	DAB1	SLC28A1
GABRA4		DNPEP	PHKA2	AC005481.5	KALRN	PPP2R3A		EID3	MBTD1	RAP2B	SP1	RABL3	ZFR	DZIP1L	C9orf41	ELAVL3	C14orf28	SLC28A1
HIPK2		DNPEP	FAM76B	GPM6A	MYLIP	PPP2R3A		AQP11	SWAP70	ARHGEF26	DDX3X	ZDHHC23	YTHDF1	DZIP1L	LRRC58	TSPAN17	TPPP	PDE8A
PPARGC1A		DNPEP	FOXN4	CCT5	FRY	PPP2R3A		KCNQ3	KDM1B	ARHGEF26	GAD2	KLF3	E2F7	NME9	SLC30A1	RGS5	GPR176	PDE8A
ZNF148		DES	KIAA1551	SLC17A7	ADGRF5	PPP2R3A		PFN2	ACACA	DHX36	RPRD1A	SOX21	SAP30BP	CEP70	WASL	SPATA12	C8orf34	PDE8A
PREX2		SPEG	ANGPT1	SLC16A14	RAB40B	MSL2		GPX7	ZNF302	DHX36	SWAP70	CNIH4	NUDT15	CEP70	NUMB	PLCB1	ZNF45	PDE8A
SESN3		SPEG	FOCAD	USP15	RALGPS2	MSL2		ELOVL2	SENP5	PLCH1	IRS1	HHIPL1	UNC5C	CEP70	STX2	SEMA5A	YAP1	PDE8A
EPB41L5		GMPPA	TMEM169	FKBP9	SYT10	MSL2		RORB	SHC4	PLCH1	SETD9	FGF7	ANKRD28	CEP70	PRKAA1	SLC23A2	DHX33	AKAP13
LPGAT1		ASIC4	GABRG1	SLC30A10	SEC23B	MSL2		STK10	FAM160B1	PLCH1	FBXW2	ELOVL2	SLC28A3	CEP70	MTCP1	GRSF1	WWP2	AKAP13
PSD3		ASIC4	NAIP	PCDHAC1	FBXO10	MSL2		UPK1B	ICA1L	PLCH1	MAP4K4	CASP2	KCNH8	CEP70	MDGA1	HNRNPAB	IRF2	AKAP13
RRP8		CHPF	FUBP3	PCDHA10	M6PR	PCCB		SNX1	YAP1	C3orf33	USP46	PAG1	FAXC	PIK3CB	RBM46	COL4A2	BCL11B	AKAP13
SLC30A7		TMEM198	E2F7	LGI2	FOSL2	STAG1		P2RY1	SLC35E2B	C3orf33	C4orf32	CHST10	PARM1	PIK3CB	KLF7	RAB8A	XIAP	AKAP13
KIAA1919		TMEM198	ZFAND4	RRN3	NCOA3	CLDN18		PSMG1	DAZ2	C3orf33	FREM2	DCAF4L1	C8orf44	PIK3CB	PFKFB3	RET	SMIM8	AKAP13
HOXA13		OBSL1	GXYLT1	TJP2	CCNA2	CLDN18		CLDN16	NOC3L	SLC33A1	POU6F1	FXYD3	TET2	FOXL2NB	CCNT1	SLC22A3	NDUFA11	AKAP13
RFFL		OBSL1	ZBTB38	L2HGDH	COG5	A4GNT		RAB6A	PIP4K2A	SLC33A1	COL9A3	CREB5	MCCC2	FOXL2NB	KIF12	TMEM194A	ARHGAP32	AKAP13
C17orf102		OBSL1	FAM98A	SLFN5	CREM	CEP70		GABPA	RALGPS2	KCNAB1	LPIN2	ARID2	KLHL31	RBP1	LTF	IDE	UBE2Z	AKAP13
FOXK1		OBSL1	NTRK2	PTGR2	RPRD2	CEP70		C8orf31	ELK4	KCNAB1	GATAD2B	PAQR8	DARS2	RBP1	PJA1	CXCR7	UCP3	KLHL25
RAB3B		OBSL1	FOXN2	VWA8	NECTIN3	CEP70		ACTR3C	CASK	KCNAB1	LYPLA2	ZNF441	RAB3GAP2	RBP1	MFSD10	ARNT	DCAF12	AGBL1
CNOT6L		OBSL1	CEACAM6	ATP2B1	CREB3L2	CEP70		ISOC1	AP1AR	KCNAB1	MYPN	MED9	BCL11A	RBP1	BRWD1	ACTR1A	CHAD	NTRK3
SLC46A1		INHA	MAP2K7	ZNF705A	C14orf28	PIK3CB		LSM5	ZNF131	KCNAB1	CDK19	CCDC93	RANBP9	CLSTN2	PRKAR1A	NSG1	ZNF264	NTRK3
C22orf29		INHA	GYPA	KPNA3	PRR13	PIK3CB		LIN54	CEP55	CCNL1	CELF2	BTN1A1	C5	TRIM42	B4GALT6	GATAD1	GATAD1	NTRK3
SLC7A1		STK11IP	PRLHR	ELF5	GABARAPL1	PIK3CB		CD9	SLC12A5	VEPH1	TJP1	RPL22	HTR7	PXYLP1	NIPSNAP3A	ZRANB1	TBCEL	NTRK3
SLC28A3		SLC4A3	CHRNB3	CAPN10	LDAH	PIK3CB		ELF5	BLCAP	VEPH1	AGAP1	SHE	GFOD1	PXYLP1	WASF3	PDCD2	PITPNB	NTRK3
SPIN1		SLC4A3	BCL2L11	TTC38	AMER1	PRR23B		DDX10	RIMS3	VEPH1	SUV420H1	YIPF5	NSD3	PXYLP1	ZEB2	DCHS1	PTCH1	NTRK3
ACADSB		SLC4A3	MRTO4	STAT1	SPTBN1	PRR23C		RFPL2	ENOX2	VEPH1	TMEM14A	MPHOSPH9	UBR3	RASA2	DCBLD2	SYNGR2	PHF19	MRPS11
SMYD1		SLC4A3	EGR3	IRF2BPL	FBXL5	PRR23C		PCNA	MLLT10	VEPH1	HDAC4	DNAJC6	STUM	GRK7	TMED8	RABGEF1	BTN2A1	MRPS11
PNKD		EPHA4	KCNE3	ZNF620	CPD	COPB2		FNDC1	FAM168B	VEPH1	AFF1	WNT5A	DSEL	ATP1B3	MYOC	CCDC88C	RTL6	MRPS11
PEAK1		EPHA4	SLC30A8	FAM109B	RNPEPL1	COPB2		WDR52	PPP1R8	VEPH1	KMT2C	NFATC2	KLK2	TFDP2	MLANA	ANAPC7	ANKRD44	MRPS11
SLC35E3		SGPP2	RGR	PPP6R3	SLC2A2	RBP2		GLE1	MAPK9	VEPH1	SLC16A10	GABPA	STAU1	TFDP2	KLHL42	NAA10	KIAA1671	MRPS11
RP11-111H3.1		SGPP2	APOL6	GAS1	DGKG	TRIM42		RPS3	AAK1	VEPH1	MED6	VPS35	NCAM1	TFDP2	C9orf85	MEF2D	OTULIN	MRPS11
TMEM132B		SGPP2	BTN2A1	C2orf83	TSPAN3	TRIM42		HIVEP3	CUTC	SHOX2	NEDD4L	TACC1	NIPBL	TFDP2	C16orf47	ABCA13	SLC45A4	DET1
NRCAM		FARSB	OGFRL1	LYSMD4	RNF111	SLC25A36		TBX3	DHX36	SHOX2	RAB7A	MIER3	HIPK2	TFDP2	AC016559.1	GRIN2A	POLR3E	DET1
KIAA2022		ACSL3	TMEM59	CCNJ	SLC9A6	SLC25A36		ALG2	BBX	SHOX2	ACVR2A	CACNG4	COX11	TFDP2	AXIN1	BEAN1	DNAAF5	DET1
CCDC149		ACSL3	LYRM7	HEY2	UBB	PXYLP1		HEMK1	DESI1	MFSD1	SETD7	DUSP19	ZSCAN30	XRN1	CPNE4	CLEC16A	CBX7	AEN
UTP11L		SCG2	DCLK1	TAF9B	ALDH3A2	PXYLP1		C2orf42	PPWD1	MFSD1	FOXP1	GOLGA7B	PCNP	XRN1	FZD6	CD8A	PYGO2	ACAN
TIFAB		WDFY1	PWWP2A	FNDC4	VAMP1	PXYLP1		BAG4	TC2N	SCHIP1	RBFOX2	ENDOV	INMT	XRN1	GAPDHS	MRPS10	AMMECR1L	ACAN
ACOT11		SERPINE2	SULT2A1	YIPF5	ZNF449	PXYLP1		RHPN2	MRPS25	SCHIP1	NEO1	SCN2A	CAPN14	PLS1	S100A16	TRIM33	AP2A1	ACAN
PLXNA4		SERPINE2	EMC2	PKLR	AMOTL2	RASA2		UPF3A	MAMDC2	IL12A	TIGD2	TANC2	METTL9	PLS1	ADAM22	C20orf118	C19orf12	ACAN
ELAVL2		FAM124B	ATP11C	C7orf41	DAD1	GRK7		SLC35A2	ZMAT3	IL12A	SESN3	SSTR3	CITED2	PLS1	BTBD3	FER	STAT4	ACAN
ITGA9		FAM124B	MCHR2	TAT	SON	ATP1B3		WNT5A	CCSAP	IL12A	ZFHX4	MON1B	ASPH	PLS1	TNFSF14	SPRY3	GSKIP	ACAN
MID1		FAM124B	PPL	SYNC	KPNA3	TFDP2		FANCL	CADM1	IL12A	KLF13	HTATIP2	RPS6KB1	PLS1	CEACAM7	SEC14L1	FCHO2	HAPLN3
AHCY		FAM124B	SLC6A14	SERPINB13	ZSCAN25	TFDP2		PECR	KIAA1468	IL12A	MBNL1	EIF4B	SLC17A5	PLS1	GORASP2	ZNF771	PRRG1	HAPLN3
STRN		CUL3	JMJD1C	NCL	SCARA3	TFDP2		CWF19L2	CDC27	IL12A	CAMK2D	FOXL1	ATG4C	U2SURP	ZBTB38	C2CD2	TUSC5	MFGE8
KIAA1147		DOCK10	PCDHB6	MANBAL	PDSS2	TFDP2		MED28	FSD1L	KPNA4	PTDSS1	USP28	ALG10	U2SURP	MKLN1	KREMEN1	ZNF518A	MFGE8
SECISBP2L		DOCK10	PPP1R12A	P2RY8	NAV1	TFDP2		CTD-2014B16.3	KHDRBS2	KPNA4	KCNK12	BMPR1B	PUS7	C3orf58	B3GAT2	MIP	CTGF	ABHD2
MTAP		DOCK10	ZNF543	RP11-366L20.2	FBXO33	TFDP2		GPR116	OLIG3	ARL14	CASKIN1	RRP1B	CSPG5	C3orf58	ARL14EP	CBLN2	GLYR1	ABHD2
ARHGEF17		DOCK10	ZC3H11A	DDX18	ZFHX3	TFDP2		CSNK1A1L	SLC35A1	PPM1L	PAPLN	CELSR1	SHISA9	C3orf58	VASH2	WIPF1	EGR3	ABHD2
TGFBRAP1		NYAP2	SV2C	USP9Y	CDH11	GK5		NCK1	SCN3A	PPM1L	FAM126A	HBS1L	RAD52	PLSCR2	PIGK	CHMP4B	CA12	ABHD2
ADAMTS5		NYAP2	ZNF432	COX20	POGZ	XRN1		PPP3R1	PDE5A	PPM1L	SAMD8	ZNF185	DCBLD2	ZIC4	YTHDF3	MAGEC2	TPGS2	RLBP1
TACR3		NYAP2	MEIS2	SMAD7	ELL	XRN1		DYNC1LI1	ITPR2	PPM1L	SIN3A	TBC1D24	TRIM9	ZIC4	TRUB1	ENAH	LIMCH1	RLBP1
LIN28A		NYAP2	FAM212B	PRR18	CC2D1B	XRN1		NT5C3	RNMT	PPM1L	BBX	ARHGEF6	CYB5R1	ZIC1	CD300A	SLC44A1	GLI1	FANCI
POFUT1		IRS1	TCF24	NRBP2	ZNF614	XRN1		GHR	PI15	PPM1L	MXI1	SOS1	PLA2R1	ZIC1	RECK	NIPAL1	TRIM33	FANCI
FAM120C		IRS1	COL9A1	FRS2	KCTD20	ATR		SLTM	CA5B	B3GALNT1	BCL9	FOXO3	RIPOR2	CPA3	GCC2	YY1	MAP6	POLG
KCNB1		RHBDD1	IL2RA	AL359878.1	CASP8	ATR		CHCHD4	PGAP1	B3GALNT1	ZC3H12C	GPX7	TMF1	GYG1	GTF2H2C	SLC25A37	PCMTD2	POLG
RP11-644F5.10		COL4A3	RABGAP1	DMXL1	CMPK2	PLS1		NFATC2	RET	B3GALNT1	GM2A	BCL6B	RBM22	GYG1	C10orf85	HIF3A	ZNRF1	TICRR
PPFIA4		COL4A3	SPCS3	KRR1	GPBP1	PLS1		ZNF585A	GSTA4	B3GALNT1	DENND5A	MTPN	PPP4R4	GYG1	ADH7	STRADB	CLIP4	TICRR
SFMBT2		MFF	ZNF460	MSANTD4	INTS6	PLS1		GNAZ	NPY2R	B3GALNT1	APLP2	KIF6	ABCA5	HPS3	TNNT1	PTBP1	STAT3	PLIN1
AP3S2		MFF	SLFN5	PEX11A	CD47	TRPC1		BRCA2	RANBP6	B3GALNT1	NFIC	WNT8A	VAX2	HPS3	STX3	TOMM6	TMBIM6	PLIN1
LRRC58		MFF	RNASEH1	NDUFB6	SLC13A2	TRPC1		ATG4C	MREG	B3GALNT1	TMPPE	P2RX6	LINGO1	CP	PRMT6	NDUFA4	ASCC1	PEX11A
C10orf76		MFF	CBLL1	OPA1	RET	PCOLCE2		SPRY4	USP27X	B3GALNT1	CBX8	KIF5C	GAREM1	TM4SF18	EVI2B	ICMT	PLAC4	PEX11A
DNM3		MFF	C12orf43	LIN7B	GPT2	U2SURP		PAWR	NF1	B3GALNT1	SOX6	EIF2C4	TRIB2	TM4SF18	RGS5	AKAP7	TAF1	PEX11A
COX10		MFF	ITPR1	MGEA5	PDE8A	U2SURP		AL139099.1	KCNJ2	B3GALNT1	SIK2	NAT1	STK38	ANKUB1	HRK	FAM3C	SESN1	PEX11A
APOPT1		MFF	F2RL1	FAM18B1	PHTF2	U2SURP		CYP26A1	CHRM2	B3GALNT1	HECW2	MKI67IP	CTSO	ANKUB1	ACTR3	MEF2A	GAN	WDR93
ATP2B4		MFF	ITPKB	GREM2	CLUL1	U2SURP		C9orf85	MPDZ	B3GALNT1	ROBO2	PDIA6	CLASP2	TSC22D2	LYRM5	LHX5	SH3TC2	WDR93
SFTPB		MFF	ALPK3	MARK3	EIF4E	SLC9A9		METTL8	KLHL42	B3GALNT1	COPS2	PTCH1	CRNKL1	EIF2A	FAM122B	KIAA0664	ATG14	WDR93
DCAF16		MFF	CLK3	WBP4	PARVA	PLSCR4		FAM127A	LUC7L3	B3GALNT1	TRPV3	ZBTB11	GPBP1	EIF2A	C7orf41	CAND1	IMP3	WDR93
WDR35		MFF	NT5C1A	FOSB	C5	PLSCR4		C5	TOR1AIP1	B3GALNT1	PISD	DCAF5	NOVA1	EIF2A	NKX6-1	ADCY1	ANKRD27	ANPEP
ATG12		MFF	SIRT1	COL6A6	DUS4L	PLSCR4		SNX10	SMAD5	B3GALNT1	TBCEL	SLC35B4	FMN2	EIF2A	MTHFD2	C18orf25	FRS2	ANPEP
ADCY6		AGFG1	NAA15	NPY2R	STXBP5L	PLSCR2		ACSS3	SNX1	B3GALNT1	PAQR3	RTP1	MBNL3	GPR171	NFKBIE	NRP2	CORO1C	C15orf38-AP3S2
SLC35D1		AGFG1	FAM101B	C4orf33	SCRT1	PLSCR2		MBD3L3	CAND1	B3GALNT1	PRKCA	KPNA6	RSF1	GPR171	MAL	AC092171.1	ZFHX3	ARPIN
MYSM1		AGFG1	PITPNB	MED9	FUT4	PLSCR2		EIF4B	ADRB2	B3GALNT1	DNAJC18	SCAMP5	CALCR	IGSF10	CACNG1	KLHDC4	CARD9	ARPIN
CAPRIN1		AGFG1	GID8	FSIP1	NDRG2	PLSCR2		CASKIN1	NCOA4	B3GALNT1	CDK16	CLNK	DCAF5	IGSF10	HAVCR1	N6AMT1	RPGRIP1L	IDH2
AKAP12		GABRA1	ABCD2	TMEM168	VSIG10	PLSCR2		TRIM52	PRRC2C	B3GALNT1	PHB2	SPTLC2	GPM6B	IGSF10	SPO11	CHRNB1	MAP2K7	SEMA4B
ANTXR1		GABRA1	TLR6	C9orf66	TMEM151B	PLSCR1		C2orf71	ZDHHC21	B3GALNT1	C2orf68	BCLAF1	DIRC2	AADAC	DKFZP667F0711	TNPO2	CSF2RB	SEMA4B
FAM117B		GABRA1	TET2	PLCXD3	ERG	PLSCR5		FAM169B	ARF6	SPTSSB	KCMF1	ADAMTS6	CHSY1	SUCNR1	EFHC1	SLC6A20	ZSCAN20	SEMA4B
N4BP1		GABRA1	CBL	C11orf57	TBX19	PLSCR5		CAV1	RAB33B	SPTSSB	FGF12	RNF115	OSBPL11	MBNL1	DDAH1	DDI2	C9orf78	SEMA4B
KDSR		CCNG1	MBNL1	POGK	SC5D	ZIC1		MGEA5	ITSN2	SPTSSB	SHROOM2	DAPK1	TBL1XR1	MBNL1	DARS	DTX1	PDCD1LG2	CIB1
EFCAB11		CCNG1	TMEM251	CCDC170	MTHFD2	ZIC1		VAT1L	DAZL	SPTSSB	CREB1	PRKAB2	ITGA6	MBNL1	TIGIT	KCTD11	PIK3C2A	CIB1
PI15		HMMR	DNAJB12	COTL1	TMEM236	ZIC1		TRIP11	VPS13A	SI	HIC2	CLEC3A	TP53INP1	MBNL1	SAGE1	CCBP2	ZCCHC14	IQGAP1
EIF2S1		HMMR	ZNF180	QDPR	UBE3A	CPB1		DLST	GSE1	SI	TRMT10B	WDR91	TXLNB	MBNL1	SMC1B	CCNK	LRPAP1	IQGAP1
SYNRG		HMMR	AL953854.2	SLC11A1	ZC3H12B	CPB1		AREG	PRKAG2	SLITRK3	YWHAB	PKP4	ABCC12	MBNL1	GIPC2	SORBS1	IRF9	IQGAP1
NUDT11		HMMR	SLITRK3	MED15	TWISTNB	GYG1		ME1	PTGER3	SLITRK3	SAR1B	ENPP6	KCNJ10	MBNL1	ERBB4	B4GALT5	SMAD6	CRTC3
SMCR7L		MAT2B	GRIA2	GOLGA8A	ATP8A1	GYG1		C1orf204	CAST	ZBBX	ARL3	HOXB9	AMN1	MBNL1	MECP2	GRK1	VASH2	CRTC3
RP3-402G11.5		TENM2	ATRNL1	DEF8	ABHD2	GYG1		STK17A	LARP1B	WDR49	MLLT3	AC005481.5	PKNOX2	P2RY1	F2RL1	TOM1L2	CPEB4	CRTC3
ICOSLG		TENM2	KCNJ11	ZNF135	KLF7	HPS3		CNIH4	KCNK2	WDR49	SPRYD4	CLCN6	LRP1B	P2RY1	PHF1	ANO2	GNAZ	CRTC3
PHF20L1		TENM2	MAP2K1	STK17A	STAG2	WWTR1		APOC3	PLXNA2	SAMD7	EIF4E	ZFAND3	ENOPH1	P2RY1	FAM20B	TECPR2	PTPRF	BLM
EPM2AIP1		TENM2	NLRC5	MMP20	SDC4	WWTR1		MON1B	PJA2	SAMD7	SLC31A1	VPS37C	GOSR1	ARHGEF26	TRIM52	PDE3A	INO80	BLM
LOX		TENM2	VPS52	ABHD5	EXTL1	WWTR1		DCP2	ATP5B	PHC3	ATP6V0A2	AKNA	SOCS4	ARHGEF26	OMA1	ASCL1	ACSF3	FES
BTBD9		TENM2	ST6GALNAC5	BICC1	DCAF10	WWTR1		C11orf72	TFEC	PHC3	NIPBL	BMP3	PROSER2	ARHGEF26	SLC16A10	MDGA1	RCBTB1	FES
PRKX		PANK3	STAT2	CTD-2140B24.4	SLC12A7	WWTR1		TMEM126B	CASKIN1	EMC8	PLEKHA6	RBL1	APOBEC2	ARHGEF26	MPV17L	KIF5A	RBSN	FES
DZIP1		SLIT3	IRAK4	FAM78A	DDX3X	WWTR1		PAK7	IRS2	IRF8	GRK5	B3GALTL	IRS2	DHX36	CHRM3	DAK	CENPN	FES
DPH3		SLIT3	SLC30A1	RBM48	C8orf4	ANKUB1		RBM48	SLAIN1	MTHFSD	MRPS25	RBM27	PEX13	DHX36	COL25A1	ZNF445	ITPR3	MAN2A2
NUP43		SLIT3	CCNY	KRT37	MAP2	ANKUB1		PCDHB10	SMC1A	MTHFSD	DMD	ORMDL2	MAP7D2	DHX36	TSHZ2	C8orf86	KAT6B	MAN2A2
SLC4A8		SPDL1	CNTN1	APLNR	PDS5A	ANKUB1		NUBP1	TAP2	MTHFSD	SEC31B	ATP2B1	DCUN1D4	DHX36	GOLT1B	RSU1	EHMT1	MAN2A2
JAM2		DOCK2	SAMD9	DPP3	CREBRF	ANKUB1		TTC5	DNAJB14	MTHFSD	WHAMM	ABCG2	FRAT2	MME	NKIRAS1	SLC6A1	ZNF248	UNC45A
EPN2		KCNIP1	C21orf49	PLEKHH1	2020-09-07	RNF13		TMEM213	ZNF181	MTHFSD	GLG1	PATE4	HECW1	MME	RXFP2	MCM8	KLF13	UNC45A
AC010536.1		KCNIP1	VAV3	GATAD2B	KIAA1191	RNF13		PAG1	ATXN1L	FOXL1	LMO4	TET2	WDR44	MME	ODAM	NEURL1B	POGZ	UNC45A
ADCY7		KCNIP1	C2orf43	URB2	SLC27A1	PFN2		FAM216B	RNF170	C16orf95	LRP1	TNFRSF1B	PKIA	MME	PTGES3	SSX6	ABHD2	RCCD1
RP11-20I23.1		KCNIP1	NT5E	PPP1R3E	PSEN1	PFN2		DNAJC5	SASH1	FBXO31	SLC35E2	VTI1A	GLS	MME	IFNA21	PITHD1	CYP4A11	RCCD1
SIGLEC8		KCNIP1	ZBTB26	ANKRD29	OSBP	PFN2		RAB35	POU6F1	FBXO31	ZBTB20	DAB1	TROVE2	MME	PCDHB10	NKAIN2	SAMHD1	RCCD1
CES4A		GABRP	WSB1	FOXL1	ASIC1	PFN2		PRDM1	SBSPON	ZCCHC14	PTCHD3	SLC16A14	ATP1B1	PLCH1	ASXL3	DLX1	SUPT16H	RCCD1
SPOPL		RANBP17	RSL1D1	EPB41L4B	ZNF12	TSC22D2		CTD-2192J16.17	MAF	KLHDC4	FGF10	CBX2	SNX6	PLCH1	CLASRP	SEMA5B	G3BP2	PRC1
ACOT9		RANBP17	ZNF609	INHBA	GDF6	EIF2A		URB2	TMEM237	KLHDC4	PRMT7	ABCA10	TMEM17	PLCH1	SHISA5	CORO2B	SVEP1	PRC1
CLTC		RANBP17	SENP7	SCRN3	SPRY4	SELENOT		ARID2	DUSP7	KLHDC4	MEF2D	LIN52	UBE2D1	C3orf33	LRRK2	ADCY5	CD44	PRC1
SYAP1		RANBP17	TTC26	ERRFI1	FZD3	ERICH6		C7orf63	CUL3	KLHDC4	GRIN2A	WNK1	PIK3C2B	C3orf33	HIST1H2BF	USH2A	ADAM12	PRC1
AL355149.1		RANBP17	TSPAN33	NLRP8	GABPB2	ERICH6		TPTE	CCDC144A	ZFPM1	CADM1	RAD18	NPTN	KCNAB1	C6orf62	NR1D2	C16orf70	PRC1
SNX5		SMIM23	PLA2G7	NOG	DCUN1D3	CLRN1		MSMO1	SMAD9	MVD	JAKMIP2	LRRC4	SGIP1	KCNAB1	ZNF207	RHOJ	LARP4	PRC1
ZCCHC14		FBXW11	ARIH1	SLC12A5	LIMD1	MED12L		HOXC13	KCTD12	CTU2	SERPINC1	ZNF532	SPIRE1	KCNAB1	SECISBP2L	HMGCS1	C19orf25	PRC1
TM9SF3		FBXW11	CTBS	RILPL1	HSD17B11	MED12L		SLC35E2B	PCDH10	CTU2		DERL2	RXFP1	KCNAB1	KLHL8	ENOX2	SPRYD4	PRC1
SEPN1		FBXW11	TRIM65	GYS2	GLCE	MED12L		AC102948.2	ZNF280C	CTU2		MGEA5	LRIF1	KCNAB1	ASH2L	DSG1	UBE2D3	PRC1
PLAGL2		FBXW11	SRSF6	SLC1A1	PRRG4	MED12L		LRRFIP1	FOXK1	TRAPPC2L		AMIGO2	NEUROD4	KCNAB1	PRPF40A	TTC13	DIRC2	VPS33B
SIM1		FBXW11	HECW1	HIAT1	SUB1	P2RY14		RP11-433C9.2	FGD6	TRAPPC2L		PPP3R1	DNAJB6	KCNAB1	GCDH	SDF2	OLFML2A	VPS33B
ZNF418		FBXW11	DCX	FAM21A	TMCC1	P2RY14		CHCHD8	ASCC3	TRAPPC2L		INPP5D	MOB3B	KCNAB1	SERBP1	GIT2	ZNF142	SV2B
HOPX		STK10	HOXC13	RAB24	CERS6	P2RY13		HDX	ZFR	TRAPPC2L		ME1	PLPBP	KCNAB1	GCLC	SCARA3	CDCP1	SV2B
GABRB3		UBTD2	BTBD7	CPOX	ATL2	IGSF10		UTP3	TRIM9	PABPN1L		GJB1	PCDH11X	KCNAB1	PICALM		DSC2	SV2B
MAST3		NEURL1B	CD244	ZNF44	MED13	SUCNR1		POLR2B	ITGA1	PABPN1L		ACSS1	PDE12	TIPARP	FREM2		STK35	SV2B
OPHN1		NEURL1B	MPZ	PPP5D1	METAP1	SUCNR1		C4orf47	TAB3	PABPN1L		URB1	CCDC15	TIPARP	WDR17		SPOPL	SV2B
DNAJC10		NEURL1B	POU6F2	TMEM127	FBXW2	MBNL1		EIF2B5	CDC14A	ACSF3		BICC1	A1CF	TIPARP	ATP11B		PCBP4	SLCO3A1
DENND5B		NEURL1B	AC079612.1	MYLK4	SLC25A36	MBNL1		POU4F2	PRKAB1	ACSF3		CCNF	GABRA4	LEKR1	STXBP4		PRRC2C	SLCO3A1
LPCAT2		NEURL1B	THUMPD1	C2orf80	HAS3	MBNL1		TSHZ2	EED	ACSF3		ZDHHC14	KBTBD2	VEPH1	C12orf4		APBA2	SLCO3A1
TBC1D28		ERGIC1	TGFBR1	TMEM215	ZNF594	MBNL1		UFL1	TRAM1L1	ACSF3		PANK1	SOS1	VEPH1	STXBP5L		MED17	SLCO3A1
GNB1L		NKX2-5	KLHDC10	SNRPD1	PIGK	MBNL1		RASSF9	KIF14	CDH15		BEST1	CCDC126	PTX3	DDN		MPP5	ST8SIA2
C7orf49		NKX2-5	AKAP2	NUDC	SWSAP1	MBNL1		ESCO2	FASTKD3	SLC22A31		CRIM1	CLK4	PTX3	IL6		AMD1	ST8SIA2
BTLA		NKX2-5	HAS2	NCF2	WWC2	MBNL1		TDRD6	IPO7	ZNF778		SPRY4	GTF2E1	PQLC2L	SLC35A3		EIF5A2	FAM174B
LHX4		NKX2-5	MPL	NEUROG2	ZNF714	MBNL1		MEIG1	PTGER2	ANKRD11		MLC1	EIF5AL1	PQLC2L	SCRN3		HEG1	FAM174B
STMN4		NKX2-5	FGD5	KLHL28	RGS7BP	MBNL1		STAM	STAC	ANKRD11		NIPA1	NSL1	SHOX2	IFNAR1		TSC1	CHD2
AC108463.3		STC2	ZNF621	UPK3B	CALM1	MBNL1		NET1	IMPAD1	ANKRD11		SLCO2A1	PRKAG2	GFM1	FAM168B		ING5	CHD2
MFN1		STC2	KIAA0408	BRMS1L	GPM6A	MBNL1		CCT5	LRRC58	SPG7		ANKRD29	GRM7	LXN	KLRC4		WSCD1	RGMA
RHOBTB3		BOD1	LONRF1	VTI1A	ETV5	P2RY1		PLSCR5	THRB	SPATA33		C1orf198	NIPSNAP3A	ARL14	SIRT1		CC2D2A	RGMA
SIK1		BOD1	POU3F2	PSMC3IP	TFCP2L1	RAP2B		INTS7	CNOT9	SPATA33		SAP18	SREK1IP1	B3GALNT1	CHURC1		ABI2	RGMA
ZYG11B		BOD1	TAGAP	CRIM1	LVRN	DHX36		EID1	ACTR1A	SPATA33		TMEM47	TRPS1	B3GALNT1	PCDHA7		PTPRS	RGMA
PIAS3		BOD1	MRI1	PRR5-ARHGAP8	TEK	DHX36		FMNL2	BRWD3	ZNF276		MAGEA11	SPATA6L	B3GALNT1	PCDHA6		BPTF	RGMA
ADH1B		NSG2	CAP2	HFE	TFEC	DHX36		TRIM44	CEP85L	ZNF276		NCAN	FAM107A	B3GALNT1	PCDHA8		WDR45B	RGMA
BRD3		THOC3	MESDC2	AGBL1	MED18	DHX36		NIPA1	SNRPE	ZNF276		LHFPL3	ZNF395	B3GALNT1	SYNRG		CSMD1	RGMA
ZNF654		SIMC1	IL10RB	PFN2	DSTYK	MME		GOLGA8A	TACC1	ZNF276		CRHR1	KRTAP4-2	B3GALNT1	PCDHA5		HMGA1	RGMA
CALCOCO2		SIMC1	ZNF471	BLOC1S4	CYBRD1	MME		CCR2	SIKE1	ZNF276		RBAK	C20orf197	B3GALNT1	PCDHAC2		DCTN1	RGMA
MCFD2		SIMC1	YTHDC1	FAM184A	LRRK2	MME		ST8SIA6	FRYL	FANCA		ZNF611	SLC35G3	B3GALNT1	PCDHA12		ZFP2	RGMA
PANK3		SIMC1	LRP8	MAP2K1	SEL1L	MME		CAPZA2	SCN3B	FANCA		CCDC120	FZD6	B3GALNT1	PCDHA1		ACADSB	MCTP2
ZEB1		SIMC1	ADH1B	RAB26	JPH3	MME		USP28	SNX10	SPIRE2		NAGA	TTL	B3GALNT1	PCDHA9		FAM129B	MCTP2
GMNC		SIMC1	RLIM	PHKG2	TSG101	PLCH1		CPOX	BTBD1	TCF25		C9orf69	PCYOX1	B3GALNT1	PCDHA11		CFAP65	MCTP2
POU2F3		ARL10	VWA3A	ABHD15	TBCEL	PLCH1		CRISP3	LIMA1	TCF25		SMARCE1	LUC7L2	B3GALNT1	PCDHAC1		PRKX	MCTP2
MESP1		FAF2	ROR1	FABP3	MMP13	PLCH1		TDP1	FBXL16	TCF25		FAM109B	PLPP3	B3GALNT1	PCDHA4		IDE	MCTP2
PDE7B		FAF2	RAD51L3-RFFL	DNAJC5	NACC2	PLCH1		FBXL17	GPRASP2	MC1R		FGD5	FOXK1	B3GALNT1	PCDHA2		CHFR	NR2F2
DNAJC27		RNF44	MAPK8	ZFAT	COL6A3	PLCH1		CNTFR	FRAS1	OR2T10		GGCT	COL15A1	B3GALNT1	PCDHA3		GCLM	NR2F2
FAM156A		CDHR2	PTAR1	TGDS	UTS2B	PLCH1		PRKAB2	ROBO2	OR2T27		KIF20B	NOX4	B3GALNT1	TUSC3		FEM1C	NR2F2
FICD		CDHR2	SERINC3	CA12	WDR35	PLCH1		ITPR2	SPATA2	ZNF692		EXOC2	CHMP5	B3GALNT1	PCDHA10		INTS6	NR2F2
IL32		EIF4E1B	CLSPN	FAM126B	DAAM1	PLCH1		GOLGA6L1	RUNX1T1	ZNF692		P2RY8	RBBP4	B3GALNT1	PCDHA13		STX16	NR2F2
SRPK1		HK3	IL22RA1	SOX21	FIGN	PLCH1		AHNAK	CNOT8	ZNF692		PTGR2	DENND5B	B3GALNT1	CLIC5		KDM4A	ARRDC4
SERTM1		ZNF346	ZNF776	TRIM9	PIK3R3	PLCH1		CYP2E1	REV3L	ZNF692		ZNF25	IRF4	B3GALNT1	C6orf211		PAICS	ARRDC4
SMG1		ZNF346	UNC45B	SOS1	PEA15	PLCH1		NSL1	PFN2	ZNF692		UBQLN1	ADSS	B3GALNT1	TMTC1		MTCL1	FAM169B
GRB10		ZNF346	RGPD6	UVRAG	CHST15	PLCH1		ASAH2	SCML2	ZNF692		CCR6	S100PBP	B3GALNT1	MSMO1		SLC2A4RG	FAM169B
PARK2		FGFR4	CLPTM1L	ADIPOR2	KLHL28	C3orf33		HS3ST1	SLC25A24	ZNF692		PCGF6	GSK3B	B3GALNT1	HOOK3		MAP3K2	IGF1R
NUBPL		FGFR4	SH3BGRL2	TANC2	EIF4E2	SLC33A1		ZPLD1	LTN1	ZNF692		MARCKSL1	C7orf43	B3GALNT1	PARL		SH3GLB2	IGF1R
B3GALT5		FGFR4	PROSER2	AMIGO2	RAI1	SLC33A1		ZNF536	GATAD2B	PGBD2		DIDO1	ST8SIA1	B3GALNT1	MTERFD1		LYRM4	IGF1R
MSX2		FGFR4	RAB8B	RNF128	SERPINE1	KCNAB1		HLA-DPA1	NDUFS4	SH3YL1		STK17A	SPAG16	B3GALNT1	UQCRFS1		ITPKB	IGF1R
MED7		NSD1	NUDCD2	SCN9A	HNRNPH2	KCNAB1		CTCFL	RBBP9	SH3YL1		MC1R	IL22RA2	NMD3	KIAA0368		GPR82	IGF1R
LUZP2		NSD1	BAALC	CHST5	DEK	KCNAB1		ZSWIM4	TMEM14A	ACP1		ZNF33B	STXBP4	NMD3	CTAGE1		ZNF714	IGF1R
LYST		NSD1	RGPD5	SLCO2A1	ZNF827	KCNAB1		STK4	TMBIM4	ACP1		MYPN	SH2D1A	SPTSSB	TMEM50A		VRK1	PGPEP1L
TGIF1		NSD1	PRDM15	TACC1	FBN1	KCNAB1		SNCAIP	DAZ1	PXDN		HUWE1	ANKRD20A3	OTOL1	CCDC91		EFCAB14	PGPEP1L
CARNS1		RAB24	SLC16A9	RIBC1	HARS	KCNAB1		FHL1	TERF1	MYT1L		ZNF101	NKAIN2	SLITRK3	RP11-17M16.1		SNAPC5	PGPEP1L
MTRF1L		RAB24	TRIM58	DAPK1	U2SURP	KCNAB1		CTBS	TRIM23	MYT1L		HEATR1	MMS22L	SERPINI2	JAM3		OTUB2	PGPEP1L
CYP8B1		PRELID1	ZNF470	TNRC6B	FAM135A	KCNAB1		ZNF362	CCNE2	MYT1L		PRAP1	KCNQ5	SERPINI2	MTBP		MAFK	TTC23
CCDC163P		PRELID1	ZNF333	DDX23	WDR33	KCNAB1		HMBOX1	GBE1	MYT1L		RP11-366L20.2	DNAJC11	PDCD10	PDHB		SRMS	TTC23
EXPH5		MXD3	NECAP2	ST8SIA5	PLCB4	KCNAB1		EFNA1	USP9X	MYT1L		MC2R	CLDN22	PDCD10	RHOQ		EVL	TTC23
C12orf73		RGS14	AAK1	NYAP1	ANKRD50	LEKR1		C5orf47	LANCL1	MYT1L		ANKMY2	ITGA1	PDCD10	ZNF577		CCDC92	TTC23
OTUD1		RGS14	CDH7	SMUG1	TIA1	LEKR1		SERPINB13	BMPER	MYT1L		BRCC3	ADCYAP1	PDCD10	ATF7IP		CACNG8	TTC23
FCGR3A		RGS14	ZNF12	IGFBP5	MNT	LEKR1		RUNDC3B	JMY	MYT1L		ARSK	DMRT3	PDCD10	ZFP69B		PMPCB	TTC23
PREPL		SLC34A1	ZNF304	TET2	TMOD3	VEPH1		NOV	TRIML1	MYT1L		TNNT1	TMEM178B	PDCD10	SMCR8		NRAS	TTC23
PRUNE2		F12	ALKBH8	LMBR1	ADAM23	VEPH1		TMEM168	RUNX1	MYT1L		TLL2	PPP2R2A	SERPINI1	MTFR1		PCMTD1	TTC23
UBE3C		PRR7	SUCO	SCN2B	ZBTB40	VEPH1		PITPNM3	ZBTB34	MYT1L		MLEC	FAM102B	SERPINI1	DERA		SLC15A1	TTC23
GNL1		PRR7	CEP76	SFMBT1	SNRPE	PTX3		NIP7	SHROOM2	MYT1L		MTNR1B	DZANK1	MECOM	MGA		L2HGDH	TTC23
RP11-144F15.1		PRR7	ADAT1	TNFRSF1B	TM2D2	SHOX2		CDKN2AIP	PLAG1	TRAPPC12		BTG1	PAGR1	MECOM	PHKG2		PCF11	TTC23
TLK1		DBN1	PDK3	PTHLH	AKIRIN2	SHOX2		OSBPL1A	FAM3B	TRAPPC12		CTXN2	MAP3K7	MECOM	RP11-113D6.10		GLCE	TTC23
NOL9		PDLIM7	RALGAPB	AJAP1	STON2	LXN		DDX26B	TAF5L	COLEC11		TRAF3	MALT1	MECOM	GNAI2		ZFPM1	TTC23
DCLRE1B		PDLIM7	C8orf46	C16orf52	NXF1	IQCJ		LIN52	ZDHHC18	COLEC11		RAB35	PKN2	MECOM	ZNF587		FMNL2	TTC23
CABLES1		FAM193B	PCLO	FAM222A	AP4E1	IQCJ		FBXO38	C2orf15	COLEC11		AICDA	DDI2	MECOM	MSR1		TMEM201	TTC23
CYB5RL		B4GALT7	F13A1	SNX29P2	THRA	SCHIP1		GATSL2	SENP7	SOX11		PAK7	PIGK	MECOM	FAM153C		TLE3	TTC23
AL160314.1		FAM153A	CD276	ZNF648	PDS5B	C3orf80		GJA3	SLTM	CMPK2		USP15	PIGX	MECOM	PRKACB		LEMD3	LRRC28
WNT2B		FAM153A	CYP4F3	SLC41A1	ZNF784	IFT80		WBP4	KLHDC1	CMPK2		RAB28	HPS5	MECOM	FAM35A		ARID5B	LRRC28
TSPEAR		FAM153A	FAM120AOS	SLC25A27	BTRC	IFT80		E2F6	PRKCB	CMPK2		ZPLD1	TCTEX1D1	ACTRT3	UBASH3B		ANKRD13C	LRRC28
KHK		FAM153A	TMEM33	SMARCAD1	FAXC	IFT80		ZNF831	FAM218A	RNF144A		TTC9	FBXO33	ACTRT3	UBE2D3		KDM6A	LRRC28
CSNK1G3		N4BP3	ATG10	MYPN	ATG101	IFT80		PHF16	CDC14B	KIDINS220		FSIP1	RAB6C	MYNN	KITLG		KLHL24	LRRC28
ATP7A		N4BP3	PLCXD3	FAM83E	FAM53A	IFT80		NUP35	TMEM70	KIDINS220		SPDYE3	UQCRB	MYNN	LMBRD2		GREM2	LYSMD4
PPP2R3A		RMND5B	C21orf62	ADRA2A	PTGS2	SMC4		ESYT3	EFNA5	KIDINS220		SLC11A1	PAPOLA	LRRC31	CCNT2		KLHL20	LYSMD4
AVPI1		RMND5B	MYBL1	MAGEB2	PRKCE	SMC4		KLHL20	PAQR5	KIDINS220		TRPA1	PPP4R3A	LRRC31	SRP19		RSRP1	LYSMD4
C21orf128		RMND5B	MGAM	TSPYL2	RORB	SMC4		PATE4	CAPRIN2	KIDINS220		TYMS	YIPF4	LRRC31	SKA2		TRIM41	ADAMTS17
AQP1		GMCL2	AR	USP3	PLAG1	SMC4		PLS3	NT5DC1	KIDINS220		NUDCD1	PM20D2	LRRC31	CD69		TRRAP	ADAMTS17
TGS1		PHYKPL	TBC1D5	ZHX1	OPHN1	SMC4		TMEM67	PLEKHM3	MBOAT2		ZNF285	RAP2A	LRRC31	SLITRK6		POLDIP3	CERS3
MRPL30		LOC102724657	TOB2	RORB	LONRF3	SMC4		SCN3A	N4BP2	ITGB1BP1		PPFIA1	YIPF1	GPR160	ARHGAP10		RAI14	CERS3
PTPRN2		ZNF354A	LARP1B	LRPPRC	GZMK	SMC4		PIK3CB	EREG	CPSF3		GUCY2D	OMA1	PHC3	PLEK		TESPA1	ASB7
AC073082.1		GRM6	ZNF431	PBX3	RTN4	SMC4		TP53TG3B	RAD18	ADAM17		FRAT2	HCN1	PHC3	ZNF649		SEC61A1	ASB7
TCF7L2		ZNF354C	USP13	KLHDC5	DCAF7	TRIM59		ELF2	KYNU	ADAM17		PDCD10	SENP2	PHC3	RAB23		HOXA9	ASB7
SLC4A10		ADAMTS2	TMOD1	CCDC146	SLC7A11	KPNA4		C14orf28	SYNCRIP	KLF11		ERBB2IP	TRIM67	PRKCI	ZNF280B		PTPN14	LRRK1
PTPLAD1		CBY3	AC011997.1	SIRT7	ATF7IP2	KPNA4		PDCD10	CXCL9	KLF11		PPFIA2	CDK19	GSE1	PTPRK		GLG1	LRRK1
SYNDIG1L		CANX	ADCY7	FAM53A	LEPROTL1	KPNA4		MSTN	CYYR1	KLF11		GREM2	PHC3	GSE1	C5orf63		COL12A1	CHSY1
CLMP		CANX	CYP4F2	OSBPL1A	ACADSB	KPNA4		IQCJ-SCHIP1	LPIN2	RRM2		CACNA1D	SETDB2	GSE1	UNC5C		SH3GLB1	SELENOS
NRIP1		CANX	SRSF11	IMPDH1	GTDC1	PPM1L		COL6A6	VAMP7	RRM2		RHPN2	GBE1	GINS2	CDS1		C2orf68	SELENOS
BCL11A		CANX	COL19A1	MTPN	STX7	PPM1L		MBD5	IGSF11	ATP6V1C2		PLCXD1	GCNT1	FOXF1	NOD2		CAPN6	SELENOS
BRWD3		CANX	GPR39	PCNX	RNF219	B3GALNT1		FPGT	FAM227B	ATP6V1C2		FZD10	SYT11	MTHFSD	IL17RD		KMT5A	PCSK6
KCNC2		CANX	TDRD15	MYLIP	FOXJ3	B3GALNT1		TP53TG3C	GABRB3	ATP6V1C2		URB2	RTCA	FOXL1	PIH1D3		TSC2	PCSK6
H3F3C		MGAT4B	CLCN4	CLN6	BCL7A	B3GALNT1		LTN1	JAG2	ATP6V1C2		RILP	TBC1D4	MAP1LC3B	CACNA1D		CBR4	PCSK6
POLE3		MGAT4B	APPL1	ENPP6	SESN2	B3GALNT1		NYAP1	CRHBP	PDIA6		PIGM	SNTN	ZCCHC14	ATP8B4		THSD7A	PCSK6
SEMA3C		MGAT4B	MAOA	BMP3	WASHC4	B3GALNT1		CDKN1B	SHISA2	PDIA6		OPA1	NUP35	JPH3	AC093802.1		SF1	PCSK6
PPIG		MGAT4B	YTHDC2	MRPL28	ALCAM	B3GALNT1		HBS1L	UTY	PDIA6		ST7L	SRSF3	SLC7A5	PEX2		PCDH7	PCSK6
ACTR8		MGAT4B	CCDC50	PDE4D	UBQLN2	B3GALNT1		ZRANB3	KIAA1841	PDIA6		FXR1	ZC3H6	SLC7A5	GPR158		PALM2	PCSK6
PLEKHA6		MGAT4B	BLMH	HECW2	GLRX5	B3GALNT1		RAD17	SLC6A6	PDIA6		CCDC104	EIF5A2	CA5A	XYLT1		MYLIP	PCSK6
ADAM12		SQSTM1	CHM	WNK1	UPK1B	B3GALNT1		PDIK1L	SEC61A2	PDIA6		CLCA2	CHN2	CA5A	CSF2RB		SOX11	PCSK6
RLIM		SQSTM1	DENND6A	ADARB1	GIT2	B3GALNT1		ERCC6L2	PPARA	PDIA6		KRT80	SNX25	CYBA	GOLGA6D		ANKRD11	PCSK6
AC011450.1		SQSTM1	TMEM189-UBE2V1	TMEM246	TMEM182	B3GALNT1		ZC3H15	FAM210A	KCNF1		LDB3	RAB37	PIEZO1	COL4A3		RNMT	TM2D3
ZKSCAN5		TBC1D9B	RP11-644F5.10	KLF3	FBXO11	B3GALNT1		IL12A	PPP6C	PQLC3		NAALAD2	STRN	TRAPPC2L	SYT4		C2orf88	TARSL2
SLC16A6		TBC1D9B	FAM98B	VAMP4	HIPK3	B3GALNT1		RAB37	DCAF5	ROCK2		CETN2	EIF2B1	TRAPPC2L	RTKN2		TERF2IP	OR4F15
ANKRD32		TBC1D9B	SSX2IP	APPL1	LZIC	B3GALNT1		CRIM1	PIK3C2G	E2F6		LIPA	MACF1	TRAPPC2L	CACNG8		STAU2	OR4F4
FGFR1OP		TBC1D9B	S1PR3	TUBGCP3	RGPD5	B3GALNT1		SLC12A5	IGF2BP3	E2F6		CPA4	MPV17L	TRAPPC2L	SEMA3C		ZBTB33	LOC102723502
C21orf62		RNF130	TMEM189	LRP12	H2AFV	B3GALNT1		TBCK	C11orf95	E2F6		AKAP10	UNG	PABPN1L	N4BP2		TEX261	LOC102723502
KB-1507C5.2		RNF130	SLAMF1	ZNF441	ZIC1	B3GALNT1		TACC1	SMAD7	LPIN1		LRPPRC	C2orf69	ACSF3	CALN1		LONRF2	LOC102723502
SELE		RASGEF1C	NUDT11	PAQR8	ATP6V1C1	B3GALNT1		Z99715.1	ERC1	LPIN1		TTC3	SRSF10	ACSF3	APOL6		CTBP2	LOC102723502
NCBP2		MAPK9	CSF2RB	REPS2	TTC14	B3GALNT1		CCDC173	AMER2	LPIN1		PDYN	ACPP	ACSF3	USH2A		HGSNAT	LOC102723532
CPSF2		MAPK9	AGPS	FBXO9	MDM1	B3GALNT1		ZBTB49	ZNF274	LPIN1		FOXA2	IL3	ACSF3	TLR3		PSMD5	LOC102723532
RAP1A		MAPK9	L3MBTL3	PDIK1L	TGM1	B3GALNT1		FAM92A1	PARPBP	LPIN1		HIVEP3	SERBP1	ZNF778	RASA2		CDK17	SNRNP25
AC079612.1		MAPK9	SETD5	SCLT1	TGIF2	B3GALNT1		PEX11A	KCNA1	RAD51AP2		UBE3B	SPIN1	ZNF778	MXD1		RYK	RHBDF1
CPS1		MAPK9	ZNF518B	SPESP1	SSR1	B3GALNT1		LACC1	AHR	SMC6		ALDH6A1	CAB39	ZNF778	B3GALT5		ZNF140	RHBDF1
EIF5		MAPK9	C3orf65	DEDD	BCAP29	NMD3		RAPGEF2	LYPD6	SMC6		COL27A1	CXCL9	ANKRD11	ZNF257		CPPED1	NPRL3
PLEKHH2		MAPK9	GABRA4	IKBIP	KLF12	NMD3		ZNF101	TTC14	SMC6		CA5B	RC3H2	ANKRD11	SLC1A2		RAB29	NPRL3
DEFB134		MAPK9	PRKCE	HEATR1	FAM81A	SLITRK3		PCGF6	ACER3	GEN1		PPP6R3	SNAP91	ANKRD11	KCND3		PDE4A	NPRL3
ZXDB		MAPK9	SLC35A3	SCN3A	NFAT5	SLITRK3		SKA2	IQSEC1	GEN1		ENPP5	KLHL12	ANKRD11	PCDH11Y		STYX	NPRL3
C15orf32		MAPK9	MFAP3	MLC1	RPGRIP1L	SLITRK3		SMARCAD1	SOWAHC	KCNS3		CELF2-AS1	RAB12	SPG7	GOLGA6C		ITGA2	HBZ
HNRNPA3		MAPK9	USP46	C17orf105	TMTC1	SLITRK3		FAM76B	KDSR	KCNS3		HEMK1	CPXCR1	RPL13	KCNQ3		SNX29	HBM
ESRRB		MAPK9	MBNL3	PIANP	DNM1L	BCHE		CHMP5	INSM2	NT5C1B		PPP3CB	ZNF10	RPL13	TBR1		TRIO	HBA2
FCRL3		GFPT2	MOCOS	ENPP4	AHI1	ZBBX		FSIP1	DCAF8	NT5C1B		ZNF705A	NVL	RPL13	ATE1		PPP1R12C	HBA2
MCPH1		GFPT2	RAB7L1	SLTM	CA13	ZBBX		ERCC4	PNRC2	WDR35		PPP1R3E	MCTP2	RPL13	PCYT1B		DCLK2	HBA1
NBPF20		FLT4	TSPAN7	TBC1D15	OXSR1	ZBBX		ACTC1	IL6ST	WDR35		L2HGDH	NSD1	RPL13	MCTP2		GLI2	HBA1
PLXNA1		FLT4	TAP2	ZNF891	MBNL2	PDCD10		SULF2	ARL15	TDRD15		PIK3R5	ANKDD1A	RPL13	TNFRSF11B		VAPB	LUC7L
TRIM71		FLT4	CFHR5	RB1CC1	SACS	PDCD10		MBTPS2	MAGOH	TDRD15		SULF2	SELE	DPEP1	SH2D7		PARD3	LUC7L
SLC11A2		FLT4	TMEM178B	DCBLD2	DNMT1	PDCD10		LDB3	UNC119B	UBXN2A		TRDN	EMB	CDK10	ELF2		RUFY3	LUC7L
STARD3NL		OR2Y1	LRRC4	KCNAB1	MED15	PDCD10		SFMBT1	DENND6A	UBXN2A		SPAG8	ABI1	CDK10	MGAT3		SIAH1	LUC7L
SAMD13		MGAT1	RFFL	SYT10	AFAP1L1	PDCD10		SPTBN1	ANO6	UBXN2A		SMNDC1	CYSLTR2	CDK10	RP11-1102P16.1		PPP1R16A	FAM234A
TMEM196		MGAT1	MAP7D2	GJA3	SALL3	PDCD10		ANO6	ARL6IP6	ITSN2		LMBR1	SPOCK1	FANCA	RGPD6		FAM126A	FAM234A
GABRG2		MGAT1	BTRC	C9orf69	RNF44	PDCD10		PGR	PARD3B	ITSN2		NIP7	IMMP2L	FANCA	MACC1		PSEN1	FAM234A
GRID2		MGAT1	PDP2	SLC2A2	CCND2	SERPINI1		CYYR1	TRIL	ITSN2		CSNK1A1L	HELZ	SPIRE2	TRERF1		MRPS10	FAM234A
FBXO31		MGAT1	ARHGAP18	CELSR1	SAP18	SERPINI1		RAD18	OR51E1	ITSN2		GBA2	NRG2	TCF25	ASPA		AGPAT3	RGS11
FST		MGAT1	SENP1	HIVEP2	KRAS	MECOM		NANOS1	TEX15	ITSN2		SLC25A27	NBEAL1	MC1R	SLC7A14		KIF21B	RGS11
ANP32A		MGAT1	TP53INP1	C11orf87	MPP7	MECOM		RPS23	ADCYAP1	CENPO		APH1A	C11orf54	OR2M7	KIF26B		NME7	RGS11
ARHGEF10		BTNL3	SPIN1	GPR116	TRIM4	MECOM		NOG	CBX5	CENPO		IFI16	MPZL1	OR14C36	ZNF367		DLG4	PDIA2
BNC1		OR2V1	KLHL29	ZPLD1	RCOR1	MECOM		PCSK2	ENOPH1	CENPO		PDE7A	LYPLA1	OR2T2	MORC3		MAML1	PDIA2
PLA2G4D		DUSP22	ATXN7	AKAP10	KRT23	LRRC34		CA3	RPL22L1	CENPO		NCALD	RIC1	OR2T3	ARID4A		ZNF84	AXIN1
MLH3		DUSP22	EIF4B	SPTY2D1	NOVA2	LRRC34		PPFIA1	AASDHPPT	CENPO		NDST3	GPATCH2L	OR2T34	ZNF804B		SEMA4G	AXIN1
RALGAPA2		DUSP22	RAPGEF6	ATF7IP2	NCAM1	LRRIQ4		GOLIM4	NIPSNAP3B	ADCY3		NOV	TRMT13	LYPD8	CD84		RGPD6	AXIN1
KCNJ16		DUSP22	SERAC1	C10orf40	CALD1	LRRIQ4		ZNF25	CHORDC1	ADCY3		CLEC9A	VPS13A	ZNF692	FAM218A		ATP6V1C1	AXIN1
VRTN		DUSP22	PAFAH1B2	ANKIB1	CBX7	LRRIQ4		SLC2A2	PITPNM3	ADCY3		SCD5	THSD7A	ZNF692	FNIP1		GPR88	AXIN1
KRT12		DUSP22	SUSD5	ITGA11	EPC1	SAMD7		SCRN3	GRB10	DNAJC27		ATG7	SEMA3D	SH3YL1	ABCG5		RGS4	AXIN1
RAB10		FOXQ1	DNM3	BTG1	CCL1	SAMD7		DDX60	CALHM1	EFR3B		GHR	ELF1	SH3YL1	C5orf28		EHD3	TMEM8A
RUFY2		MYLK4	GSDMA	ZDHHC23	NMUR2	GPR160		EPB41L4B	PWWP2A	ASXL2		ZSCAN30	ZFYVE16	SH3YL1	TBX20		FZD8	TMEM8A
LIMCH1		MYLK4	CYLC2	OSTF1	AIG1	PHC3		FXR1	HIC2	ASXL2		RAPGEF2	AEBP2	TMEM18	PCSK5		KCTD12	NME4
NPTX1		MYLK4	HLA-DOA	PUF60	ST8SIA4	PHC3		LIN7B	KCNMB1	GAREM2		CD226	GNPTAB	TMEM18	TTC22		SSBP3	NME4
DPYSL3		MYLK4	YAF2	MMGT1	TMEM64	PHC3		PCNX	LIN7C	GAREM2		VCP	ARF3	TMEM18	RAB6C		RNF213	NME4
BCL2L11		MYLK4	ZNF664	CLCN6	ATP2C1	PHC3		CRH	L3MBTL3	SELENOI		PLS3	WNK1	PXDN	RGPD5		ATR	NME4
NCAM1		SERPINB1	PYGO1	NR2C2AP	CRCT1	PHC3		C10orf91	CCDC186	OTOF		C4orf33	DHFR2	PXDN	ITGA1		IGF1R	NME4
FLRT3		SERPINB1	GPALPP1	PIGM	L3MBTL3	PHC3		PISD	ATP8A1	SLC35F6		ARF1	TNFRSF19	RNASEH1	TET3		NLGN1	RAB11FIP3
DUSP6		SERPINB6	HLF	CYB5R4	RNF213	GSE1		KCTD15	ANAPC13	DPYSL5		TP53INP2	ABHD2	ALLC	TRPV2		IGLON5	RAB11FIP3
TAF1L		SERPINB6	LONP2	MPHOSPH9	NAB1	GSE1		PIGN	ALG2	DPYSL5		RRN3	OOSP2	SOX11	ZDHHC15		FRYL	RAB11FIP3
SDK1		SERPINB6	STAG2	SAP18	FKBP5	GSE1		USP15	CYP11B1	DPYSL5		DENND1B	SMIM8	RSAD2	C1orf54		UBIAD1	CAPN15
MOCOS		SERPINB6	CDADC1	MEX3D	CSNK1G3	GSE1		GNPDA1	EPDR1	DPYSL5		ID4	KCNK10	KIDINS220	VPS36		BMPR1A	CAPN15
OSBP2		SERPINB6	BNIP2	TMEM217	KCNAB1	GSE1		CLLU1	HS6ST2	AGBL5		PPP4R1	MYO5A	KIDINS220	TAB2		WDR82	CAPN15
RGR		SERPINB6	EIF2AK2	GAP43	CDC73	GSE1		CCDC82	ESM1	AGBL5		IL12A	HSDL1	KIDINS220	EDEM3		MICAL3	PIGQ
SCN7A		SERPINB6	ZNF502	MSMO1	CTIF	MTHFSD		PPP6R3	DDIT4L	EMILIN1		ELTD1	PTPDC1	KIDINS220	SLC25A32		TGFBR1	PIGQ
CCR9		SERPINB6	PLEKHH2	FAM216B	ZNF107	MTHFSD		TMEFF2	ADH1B	KHK		ITGBL1	NKIRAS1	KIDINS220	POLR2D		EXOC3	RAB40C
ADA		SERPINB6	ZHX2	TMEM5	FNDC4	MTHFSD		SLC6A11	WWC1	KHK		ASH2L	HMGXB4	KIDINS220	LCLAT1		DGKA	RAB40C
RREB1		SERPINB6	SSR1	SLC2A4RG	ARFGEF3	MTHFSD		ELTD1	LONRF2	KHK		OSBPL1A	KIAA1328	KIDINS220	EXOC5		NR3C1	RAB40C
SLC4A4		NQO2	DSTYK	ZNF831	ZNF567	MTHFSD		C2orf73	UXS1	CGREF1		C1orf180	ETV5	ASAP2	SNIP1		RXRA	RAB40C
GZMK		RIPK1	ABHD17B	PION	RNF103-CHMP3	FBXO31		TRAF6	TUBB2A	CGREF1		PLD6	EEF2K	ASAP2	RABGAP1L		MBP	RAB40C
RPL28		BPHL	PRRG1	UPK1B	ELAVL4	ZCCHC14		MAPK7	TRIM52	TCF23		ST8SIA6	MAMLD1	ASAP2	GGH		SLC6A15	RAB40C
HTR5A		TUBB2A	HNRNPUL1	SOBP	XK	ZCCHC14		SLIT1	A1CF	SLC5A6		TRIM9	FAM198B	CPSF3	DNAH10OS		NUDT16	WFIKKN1
AHCYL2		TUBB2B	ZNF397	ARX	SOX6	ZCCHC14		RBL1	GPR180	DNAJC5G		GPR137B	RBMS3	ADAM17	LTB4R		ATP11C	WFIKKN1
DEFB118		SLC22A23	PALM2-AKAP2	NPTN	CREBBP	ZCCHC14		FBXW7	ITGAV	DNAJC5G		CTD-3074O7.11	STX2	YWHAQ	DDX17		LARP1	METTL26
GMCL1		SLC22A23	HGFAC	ZNF266	ACTR10	ZCCHC14		TET2	RNF138	DNAJC5G		CPT1B	DNAJC5	GRHL1	FAM45A		ZNF341	METTL26
SULT2A1		SLC22A23	FAM83B	CPEB4	PWWP2A	JPH3		SLC1A1	NECTIN1	DNAJC5G		TIMM17B	SOCS6	GRHL1	PFN2		CCDC62	METTL26
MTHFD2		SLC22A23	KIAA1598	FAM57A	PAX6	SLC7A5		GPC5	SHCBP1	MPV17		MAN1A1	TARDBP	KLF11	SNAPC1		RTL10	METTL26
PCCA		SLC22A23	SPATA13	PDCD10	RBMX	CA5A		ZMAT3	EPB41L4B	EIF2B4		CHMP7	KCND1	KLF11	RP11-664D7.4		ZNF155	METTL26
FGF20		SLC22A23	XIAP	TLR7	GUCY1A3	RNF166		BICC1	STK4	EIF2B4		UQCR11	NNT	KLF11	IKZF2		OLFML1	METTL26
MIPOL1		SLC22A23	MIOS	ABCC5	MRPS25	CTU2		VTI1A	ABCA1	SNX17		NDUFS6	RPS6KA6	ATP6V1C2	PDXDC1		KIAA1958	METTL26
TRIM25		SLC22A23	TAPT1	FXR1	RAP1B	CTU2		OTOGL	LRPAP1	SNX17		ZC3H15	GNG12	ATP6V1C2	PTF1A		PANK3	METTL26
FGF5		SLC22A23	PRDM6	KLHL20	ONECUT2	CTU2		UBQLN1	ERICH3	PPM1G		NDUFA10	MAP10	PDIA6	BX088651.1		C21orf58	METTL26
SEC14L5		FAM50B	CLOCK	ZNF3	COL4A3	TRAPPC2L		CEP41	SIN3A	NRBP1		ALDH1A2	STX3	PDIA6	CBWD7		TMEM154	METTL26
MPC2		FAM50B	GTF2H5	NCOA1	ASAP2	TRAPPC2L		KLHDC5	FGF18	GCKR		NRBP2	GRK3	PDIA6	ZNF782		MED22	METTL26
RNF39		PRPF4B	PRRG4	PEX5L	TNS1	TRAPPC2L		FGF7	NCK2	GCKR		ZNF620	UBE2K	GREB1	KLHL32		AGL	MCRIP2
SAMD9		PRPF4B	AKR1C2	C5	TTPAL	TRAPPC2L		HFE	NAP1L2	GCKR		CCR2	ANKFY1	GREB1	GSKIP		PCNX1	WDR90
SLITRK2		PRPF4B	SLAIN2	URB1	UBR7	ACSF3		SAMD8	C5orf24	C2orf16		FAM57A	PPP2R1B	TRIB2	GLT1D1		STK10	WDR90
SLMO2		PRPF4B	ORC2	AKAP1	PURB	ACSF3		TRAPPC6B	MGAT3	ZNF512		BOD1	NRF1	NBAS	HMMR		PCM1	RHOT2
PON1		PRPF4B	FAM117B	SHE	UTRN	ACSF3		TMED2	HNRNPA3	ZNF512		F13A1	TBX2	NBAS	AKAP12		OSBPL3	STUB1
MOB1A		ECI2	PIK3CB	LIPA	C12orf75	ACSF3		DAZ2	GPRASP1	ZNF512		LINC00675	SVIP	FAM49A	DNAJB4		PPEF1	JMJD8
LIFR		ECI2	AK5	MFF	CSNK1A1	ZNF778		ETS1	IRF4	ZNF512		KIAA1211L	N4BP2L1	RAD51AP2	DIEXF		MYO10	JMJD8
CD276		ECI2	DIO2	STK4	MTPN	ANKRD11		PTHLH	GOLGA8G	CCDC121		ZNF705G	SH2D1B	GEN1	DYNC1I2		SUSD1	JMJD8
CARHSP1		CDYL	MTX3	FAT3	IKZF2	ANKRD11		RAP1B	PPIL4	CCDC121		SS18L2	NHSL1	GEN1	ZC3HAV1		TIAM2	WDR24
CCDC91		CDYL	AKT3	C7orf55	ZBTB20	ANKRD11		NLRP11	CCNA2	CCDC121		MYLK4	SBSPON	GEN1	PRELID2		SHCBP1	WDR24
CSTA		CDYL	SCD5	USP28	ZNFX1	SPG7		SHISA2	TIFA	SUPT7L		HIVEP2	PARP3	GEN1	TMEM170A		PSMB2	WDR24
FERMT2		LYRM4	MORC3	DCP2	LYRM2	RPL13		NUDCD1	HPF1	SUPT7L		FBXO16	CLDN2	NT5C1B-RDH14	TMEM237		PCYT2	WDR24
ATG10		LYRM4	MYO3B	DENND1B	SLTM	RPL13		DUSP19	EXOC5	SUPT7L		C1orf204	PFKFB2	NT5C1B-RDH14	NEDD4		CCM2	WDR24
CD38		FARS2	PAIP2	SMOC1	SUSD6	RPL13		ZNF267	BMT2	SUPT7L		YEATS2	AK2	NT5C1B-RDH14	MDM2		SYK	FBXL16
ZNF430		FARS2	GLRX3	FAM73B	PPP1R10	SPATA33		PPP2R5E	YAF2	SUPT7L		MAP3K15	RAD51B	NT5C1B	BNIP2		DGKG	METRN
COMMD9		NRN1	GGACT	NOV	CHST11	SPATA33		ESM1	ELOVL6	SUPT7L		C10orf2	HASPIN	NT5C1B	FAM117B		POU3F1	METRN
MATN3		NRN1	NAIF1	HSPA8	BCL2	SPATA33		SCN9A	MSTN	SUPT7L		CYYR1	SLIT2	NT5C1B	ST6GALNAC3		HIC2	FAM173A
N4BP2L2		F13A1	WDR5B	ATP12A	CCNL2	FANCA		CREB5	KCMF1	SUPT7L		TTC17	PHTF2	NT5C1B	FSTL1		USF1	FAM173A
ZNF330		LY86	ATP8A1	C6orf211	PCYT1B	FANCA		ADIPOR2	MTMR12	SLC4A1AP		MAPK7	RPL27A	NT5C1B	EDEM1		AQP3	CCDC78
ZNF329		RREB1	GHR	APCDD1	STX3	MC1R		GAD2	TM7SF3	RBKS		EMR2	ALKBH8	NT5C1B	AGMAT		LUZP1	HAGHL
ITGB1		RREB1	SUCNR1	GABPB2	TMPO	OR2T10		MTMR10	TMEM164	BABAM2		AKAP1	SKP1	MATN3	HOMER1		RIMKLB	NARFL
FUBP3		RREB1	SLCO1C1	SAMD8	TAOK1	OR14I1		TMEM47	LHX9	BABAM2		AGAP1	ISL1	PUM2	SLC27A6		POMT2	NARFL
CNTN1		RREB1	PALD1	C14orf28	GRIN3A	LYPD8		CNN3	SLIT1	BABAM2		SLC25A29	OR2H1	PUM2	LDLRAD4		RASAL2	NARFL
MED13		RREB1	RNF166	PBOV1	RNF180	SH3BP5L		NPY2R	NRCAM	BABAM2		AC139426.2	SLITRK6	PUM2	SPAG17		PANK1	NARFL
DDB1		RREB1	ZNF654	UBFD1	NR3C1	FAM110C		NOC3L	TMEM41B	BABAM2		SRC	SEMA5A	LDAH	RPL10A		LGSN	RPUSD1
SOGA1		RREB1	ANO6	CREB5	RNF144A	TPO		CASC4	ARHGEF9	FOSL2		HGSNAT	DERA	LDAH	RP11-180C1.1		CARMIL1	RPUSD1
MAP4K5		RREB1	GNAL	RXFP1	DR1	TPO		SBSPON	RBM8A	FOSL2		AKR1D1	KIF5B	LDAH	SSBP3-AS1		MINK1	RPUSD1
CECR5		SSR1	RIMS3	MTMR10	GABRA4	TPO		TBC1D15	USH2A	PLB1		C20orf196	NDC1	LDAH	KIAA1919		SMAD4	RPUSD1
SLC25A46		SSR1	ZKSCAN3	SEC23B	QSER1	TPO		PLCXD3	TFPI	WDR43		CTD-2192J16.17	MIPOL1	LDAH	KLRG1		THOC2	RPUSD1
CEP97		SSR1	P2RY1	PTEN	EPHA4	TPO		CA5B	NDNF	TOGARAM2		UBE2A	TPK1	LDAH	TRIM35		PUS7	CHTF18
TMCO1		SSR1	BIRC6	VPS37A	GPR137C	TPO		TLL2	COL21A1	TOGARAM2		CA12	SNX11	APOB	MZT1		PI15	CHTF18
ZNF154		DSP	ZNF519	ZDHHC14	DUT	TPO		TAF9B	MDGA2	C2orf71		MSMO1	ZNF281	APOB	MAP3K2		PLEKHM2	CHTF18
RNFT1		DSP	PAG1	ESCO2	CELSR1	TPO		CCNJ	ANKFY1	C2orf71		TRIM44	LTA4H	TDRD15	GIMAP2		PCDHB14	CHTF18
FOXA1		DSP	ESRRB	CLUL1	FAM169A	PXDN		SULF1	ZNF566	CLIP4		GAS1	CHMP2B	ATAD2B	GABRA5		TTC4	GNG13
MYOM3		DSP	ABCC9	APEX2	ZNF518A	MYT1L		ZNF207	MMGT1	ALK		GOLGA6L1	TRA2A	UBXN2A	MAB21L2		ARHGAP42	SOX8
FNBP1L		DSP	SCMH1	YIPF4	SOCS2	MYT1L		FAM217B	BHLHE22	ALK		VPS37A	RIOX2	TP53I3	DLAT		SH3D19	SOX8
TMSB15B		DSP	AGO4	KIAA1614	C1GALT1	MYT1L		TMX4	BPY2	YPEL5		CES3	KIT	PFN4	ZNF460		SOX9	SSTR5
RALA		SNRNP48	SH3RF2	EIF2C4	TRIM59	MYT1L		SLC25A27	DPH6	LCLAT1		DAZ1	DCP1A	FAM228A	WHSC1		ANKRD34A	C1QTNF8
TTLL7		SNRNP48	HEY1	ZMAT3	BCLAF3	MYT1L		PIGM	KRT80	EHD3		GDF11	FNTB	ITSN2	CLMP		ADAR	CACNA1H
CS		TXNDC5	CD44	UBQLN1	ZNF282	MYT1L		WDR91	UNC50	SLC30A6		SCLT1	ALCAM	ITSN2	RP11-156E8.1		SORL1	CACNA1H
HTR7		TXNDC5	GOPC	PIK3CB	STXBP5	MYT1L		DAZ1	ZNF326	SLC30A6		DIRC1	SLC18A2	ITSN2	TMF1		PRDM4	CACNA1H
INHBB		SLC35B3	RNF144B	UBE3B	EIF3J	MYT1L		KRR1	DAZ4	SLC30A6		DDX60	RAB3IP	ITSN2	C16orf87		PCGF3	TPSG1
ZCWPW2		SLC35B3	CHD7	FAM175B	BAZ1A	MYT1L		ITGAV	TYW5	SLC30A6		SLC17A5	PCNX4	NCOA1	SWAP70		MTA1	UBE2I
EXOSC3		TFAP2A	SP110	NUP133	PCYOX1	MYT1L		SOS1	MTMR10	SATB2		RPL23A	XIAP	NCOA1	ZBTB33		CPLX2	UBE2I
FZD8		GCNT2	TMEM107	SULF1	MAFF	MYT1L		DLGAP2	DPY19L3	SATB2		E2F6	C1orf52	NCOA1	RICTOR		GNA15	UBE2I
AAED1		GCNT2	LDHD	ERCC4	ERCC4	MYT1L		ERRFI1	FAM126B	DOPEY2		RASA4	HBEGF	NCOA1	MMP19		ASIC2	UBE2I
EAF1		C6orf52	LRIT2	FRZB	SNX9	MYT1L		SLC5A12	FYTTD1	DOPEY2		EPHA7	KCTD16	CENPO	PUS7		NOTCH1	UBE2I
DLL1		C6orf52	TREML4	TNKS	RCOR3	MYT1L		GPM6A	GPR173	CLDN14		LRRFIP1	ATP2B4	CENPO	KRTAP24-1		TBC1D24	UBE2I
C15orf62		TMEM14C	MFN1	RAB9B	SMURF2	EIPR1		B3GALTL	CNTD1	CLDN14		TIGD6	GOLGA8B	CENPO	TACR3		MFN1	UBE2I
NKAIN3		TMEM14C	SPHKAP	NIPA1	UHMK1	EIPR1		C16orf52	RAPGEF1	CLDN14		SMUG1	ARFGEF2	CENPO	ZMYM3		CDON	UBE2I
GJC1		TMEM14C	PGK1	CDS1	UBR1	EIPR1		ZNF532	SORCS3	SIM2		PNPLA2	ZCCHC6	CENPO	IRF8		AFF1	BAIAP3
GANC		TMEM14B	HNRNPA3	ERBB2IP	BMPR1B	RNASEH1		WNT16	RLIM	HLCS		NCAPG2	FAM114A1	CENPO	CHP2		BEND4	BAIAP3
PPP1CB		TMEM14B	LEPROTL1	DDX6	RHOB	SOX11		FAT3	RAP2B	HLCS		TRIM16L	ST3GAL5	CENPO	APOLD1		KLF16	BAIAP3
IFI44L		GCM2	DLG3	PCDHB4	PAK1	RSAD2		INHBA	ARL4A	TTC3		MANBAL	CEP170	CENPO	PTPN22		ZNF841	BAIAP3
DNAJB9		SYCP2L	C2orf88	ENPP5	GABRA3	RNF144A		SYT10	GAS2	TTC3		AC022431.2	BACH2	ADCY3	RBMS1		SIRT7	BAIAP3
UGT2A1		BFSP2	GALNT10	MYBL1	RND2	RNF144A		RECK	C1GALT1	TTC3		ABCG5	VDAC2	ADCY3	PAPOLG		MTMR3	BAIAP3
XPNPEP1		CDV3	DDB1	EIF2C1	CNTNAP3	ID2		WASF3	RAB5A	TTC3		ZCCHC12	CEP68	EFR3B	XPO4		ZNF830	BAIAP3
GPR133		CDV3	KCND2	VPS53	ZBTB8A	ID2		DCBLD2	GOT1	VPS26C		CLPX	CTNND2	EFR3B	HIPK3		TOP2B	BAIAP3
RLF		CDV3	CA13	TTPAL	MAX	KIDINS220		SLC35B4	CASP2	VPS26C		FOSB	ROBO1	DNMT3A	MDM4		MANEA	BAIAP3
KIAA1551		CDV3	OTOR	RAB3B	ADARB2	KIDINS220		HECTD2	MEGF11	VPS26C		SYCP2	RABIF	DNMT3A	TIGD6		MACF1	BAIAP3
NFIB		CDV3	PRRG3	ICOSLG	OSTF1	KIDINS220		ARL5A	OSGIN2	VPS26C		RB1CC1	HEXIM1	DNMT3A	SCRN1		SMAD2	BAIAP3
OR4C11		CDV3	DSCAM	C22orf29	ZNF831	KIDINS220		GPR180	EGLN3	VPS26C		HECTD2	CNST	ASXL2	CUL5		WARS2	BAIAP3
AC024563.1		RAB6B	HDGFRP3	LRRC58	GPC6	KIDINS220		RRP15	ADGRL2	VPS26C		IREB2	COBL	ASXL2	C10orf118		EPDR1	TSR3
DERL1		SLCO2A1	STYX	KIAA0513	RRM2B	KIDINS220		JHDM1D	PMM1	VPS26C		ICOS	SNX14	KIF3C	ZNF226		ZNF33B	GNPTG
MOCS2		SLCO2A1	GTDC1	ZNF507	PRRT2	KIDINS220		MKLN1	DCAF10	KCNJ15		CAPN7	COLEC12	KIF3C	IMPAD1		ADSL	UNKL
RAET1L		AMOTL2	MMAA	LPIN1	KRTAP26-1	KIDINS220		GABRA4	ZBTB44	KCNJ15		TRIM52	SLCO1A2	GAREM2	FRAT1		FAM214A	UNKL
MFSD6L		AMOTL2	SRSF10	SOGA1	WBP4	KIDINS220		TBL1XR1	SYNJ2BP	KCNJ15		NDUFB6	RIPPLY3	GAREM2	ESYT2		ITPR1	UNKL
YTHDC1		AMOTL2	GINS2	GRIK3	PTHLH	KIDINS220		DNM3	SLC6A15	KCNJ15		NPNT	PANK1	GAREM2	ZBTB40		TK2	UNKL
ARL17A		AMOTL2	CLUAP1	SLC30A7	CECR6	KIDINS220		PSD3	CIT	SIX1		SPIN2A	PPP1R12B	ADGRF3	NCBP1		HOOK1	UNKL
ZNF83		CEP63	RFC1	C2orf49	GMNC	KIDINS220		SESN3	SLIT2	SIX4		HIST2H2BF	C2orf88	SELENOI	RBM14-RBM4		MYO18A	TELO2
FOCAD		CEP63	NCOA2	ZYG11B	DTNA	KIDINS220		ZNF148	SLFN12	SIX4		KDM4A	TMEFF2	SELENOI	BTD		MTOR	IFT140
SRP19		CEP63	HSPB7	SYNRG	GORASP2	KIDINS220		TMEM25	TMEM123	MNAT1		TRAPPC6B	MSL3	SELENOI	GABRQ		PAPOLA	IFT140
AL137145.2		CEP63	GLTSCR1L	THAP6	ARL13B	KIDINS220		SFMBT2	HSF5	TRMT5		TRMT10B	RGPD4	TMEM214	SNX4		LRRC4	IFT140
CXCL9		CEP63	PPP1R13B	LDOC1L	DYRK1A	KIDINS220		SLC6A6	PPM1A	PRKCH		RRP15	HOOK3	AGBL5	CDK17		TNRC18	IFT140
CES2		KY	RSPO3	PLA2G12A	FAM189B	MBOAT2		RAB3B	PRPF38B	HIF1A		CSRP1	SNX18	AGBL5	MAB21L1		ZMYND8	CRAMP1
HPS3		PPP2R3A	NOTO	EPM2AIP1	GRIK1	MBOAT2		BTBD9	LMO4	HIF1A		SOBP	CAPS	KHK	RSL24D1		SBK1	JPT2
YTHDC2		PPP2R3A	TMEM109	FAM117B	SAMD12	ASAP2		GABRB3	HIPK2	HIF1A		PABPC5	EVI2A	KHK	TMEM189-UBE2V1		CAV1	MAPK8IP3
MAP3K1		PPP2R3A	SLC4A5	CTDSPL	DDX5	ASAP2		HIPK2	OSMR	HIF1A		DDA1	XYLT2	CGREF1	COX18		SLX4	MAPK8IP3
RGPD6		PPP2R3A	ZIC1	PDE4C	STC2	YWHAQ		ACADSB	DAZ3	HIF1A		HOXC13	NAV1	ABHD1	ZFP30		VCAN	MAPK8IP3
CABP7		PPP2R3A	NAA35	NOL9	GLS	YWHAQ		EIF5	LIMK1	KCNH5		ATP5G3	ZSWIM6	ABHD1	FAM9C		C1QTNF4	MAPK8IP3
TYROBP		PPP2R3A	SP5	ACOT11	TRIB1	TAF1B		SYAP1	MEST	KCNH5		HIVEP1	COX18	PREB	TMEM189		KLF10	MAPK8IP3
DCLK3		PPP2R3A	LYN	NT5C2	GABRR1	GRHL1		LIN7C	MGAT4A	RHOJ		HFE2	ARHGEF12	PREB	FBXO33		IRS2	MAPK8IP3
PTH		PPP2R3A	EPHA5	NAA40	TRIM33	GRHL1		UQCRB	PRKD3	RHOJ		RP11-111M22.2	ANP32A	PRR30	WASF1		HDAC8	MAPK8IP3
TNFRSF17		PPP2R3A	EFNA5	SAMHD1	RFWD3	RRM2		RLIM	GPC5	RHOJ		NLRP8	RNF141	CAD	NLRP2		ITGA6	MAPK8IP3
PTPN9		PCCB	MYLK3	FOXK1	KCTD10	RRM2		NANP	TCP11L2	PPP2R5E		RIOK2	SHISA5	DNAJC5G	MESP2		NDUFS6	NME3
ANP32E		PCCB	HSPD1	MTAP	SMAD2	HPCAL1		ATF6	GNAQ	PPP2R5E		SKA2	PIP4K2A	DNAJC5G	GMNN		PTEN	MRPS34
ITPR1		PCCB	EXOSC2	DENND5B	BICD2	HPCAL1		FRMD3	YES1	PPP2R5E		AGTR2	NEBL	DNAJC5G	DTL		SLC25A22	MRPS34
C6orf120		STAG1	ZNF264	MIPOL1	LMNB1	HPCAL1		EEA1	ANO5	WDR89		FAM76B	P4HA1	UCN	TIRAP		HILPDA	IGFALS
PCDHB14		SLC35G2	SMTN	NFIC	NEXMIF	HPCAL1		AHCYL2	PPARGC1A	SGPP1		RAB37	LINC01600	EIF2B4	ATXN7		HSPBAP1	IGFALS
PAPSS1		SLC35G2	PDGFRA	KDSR	ADAMTS5	HPCAL1		ZNF33A	HMGB1	SYNE2		RILPL2	EEA1	EIF2B4	CAV1		FAM102B	IGFALS
COBL		SLC35G2	MINA	ATF6	KATNAL1	ODC1		SOCS6	PHLDA1	SYNE2		DDX4	FAM172A	EIF2B4	RBM22		TMED7	HAGH
DPPA4		NCK1	TFPI	SEC14L5	ETV1	ODC1		MLH3	ANKRD44	SYNE2		FAM25E	PTCD3	EIF2B4	GMPR2		BTG1	HAGH
ZNF562		NCK1	FAM105A	SPAG9	FAM98A	NOL10		SMG1	SPICE1	SYNE2		GINM1	LDLR	PPM1G	NPTN		BRF1	HAGH
SLC26A7		NCK1	N6AMT1	SNX8	OSBPL1A	NOL10		ADAMTS5	NKD1	ESR2		UTRN	UBE2H	NRBP1	CDIP1		TMEM65	FAHD1
TLN2		NCK1	CCDC69	SMYD4	FMNL3	NOL10		TPH1	DDI1	ESR2		ZNF670	FCRL4	NRBP1	PRRX1		C16orf86	FAHD1
CHURC1		SOX14	FECH	DCAF16	SLC1A1	ATP6V1C2		JMJD6	CD59	ZBTB1		IL12B	TRIM6-TRIM34	NRBP1	MAGT1		THBS1	FAHD1
BEND6		SOX14	TAF1A	C22orf13	IRF8	ATP6V1C2		KIAA1147	TMEM135	ZBTB1		HIST1H2BJ	CEP41	NRBP1	CHN2		PEAK1	MEIOB
MECOM		CLDN18	KLHL9	RFWD3	RYR2	ATP6V1C2		C6orf47	NPHP1	HSPA2		C15orf38-AP3S2	ARID2	NRBP1	ATXN1		C20orf27	MEIOB
EMC2		CLDN18	FBXL2	RHOBTB3	VEZF1	ATP6V1C2		FAM120C	CDC42	HSPA2		UFL1	CLRN3	KRTCAP3	SAT1		BMP6	HS3ST6
MAP7		ARMC8	PWP1	ADCY6	CMYA5	PDIA6		ST6GALNAC3	CHAC2	PLEKHG3		NSA2	ATP8B4	KRTCAP3	SLC1A1		LRRC8B	MSRB1
KIAA1009		ARMC8	UNC80	AP3S2	PCDH9	PDIA6		CEP97	FREM1	PLEKHG3		COQ10B	NOD2	GCKR	FGF12		ZNF208	MSRB1
HUS1		ARMC8	ZNF132	ZNF329	VAMP3	PQLC3		GNL1	TET2	PLEKHG3		CDKAL1	SLC25A24	C2orf16	TMEM200A		RNPS1	RPL3L
IER3IP1		ARMC8	RPL28	MXD4	STXBP1	PQLC3		RBM47	IDH1	PLEKHG3		AFP	PI4KB	C2orf16	SPIN4		THRAP3	RNF151
CDO1		ARMC8	DLEC1	EIF2S1	C18orf8	PQLC3		SPOPL	CEP120	SPTB		APCDD1	FMN1	GPN1	MANEA		RMND5A	RNF151
TMEM252		ARMC8	SOS2	TMEM132B	RASGRF2	PQLC3		ZNF154	JAKMIP3	SPTB		PFN2	NIPSNAP3B	GPN1	PIGF		PTAR1	TBL3
CCL5		ARMC8	HIF3A	C1orf158	KIAA1210	PQLC3		GMNC	TIMM21	RAB15		SOX7	SPHKAP	GPN1	RASSF8		PPIP5K2	TBL3
EEA1		ARMC8	USP47	SNPH	PRKAB1	PQLC3		REST	SEC62	CCDC196		CACNG1	STARD3NL	GPN1	TPTE		ENTPD6	GFER
SYNJ2		ARMC8	CDH2	PTK6	WDR19	PQLC3		CPLX1	TAF9B	CCDC196		AL020996.1	CHURC1	GPN1	ENPP3		LYSMD3	SYNGR3
TMEM68		ARMC8	CGN	GNB1L	MBD4	PQLC3		KDELC2	SLMAP	GPHN		HNF1B	ARMT1	GPN1	AP003068.23		PCDHAC2	ZNF598
CYB5A		ARMC8	STK38L	PLXNA1	NUP58	ROCK2		KIAA1257	LCP1	GPHN		MAGEB2	SLC30A5	GPN1	STARD4		STARD7	SLC9A3R2
NARS2		ARMC8	ZNF99	POLA2	FAM117B	ROCK2		TMEM88	RPE	GPHN		PPM1E	PDGFD	SUPT7L	RPA3-AS1		ZNF423	SLC9A3R2
HRH4		ARMC8	VGLL3	C21orf62	PIGS	E2F6		PHF20L1	WIPF3	GPHN		ADRA2A	CCAR1	SUPT7L	GPR151		HIVEP1	SLC9A3R2
HRK		ARMC8	NUP62	C10orf32	SLC35F1	E2F6		MTCH2	HMGCLL1	GPHN		JHDM1D	ANKRD6	SUPT7L	VSTM5		HERC2	SLC9A3R2
ZFC3H1		NME9	MYLK	MCFD2	SOD2	E2F6		C17orf102	ABCC9	FAM71D		SPA17	CHMP4B	SUPT7L	HEATR2		ZNF207	NTHL1
FAM83D		NME9	CTC-432M15.3	NMNAT2	ERAP1	E2F6		PPP2R1A	PPM1H	MPP5		TRIP11	TNFAIP8	FOSL2	DMP1		ZNF135	NTHL1
SLC4A1AP		NME9	C11orf74	ST6GALNAC3	SFPQ	GREB1		TMEM132B	MALT1	MPP5		BCL2L10	HOXA10	PLB1	RTN4		ESR1	NTHL1
AL079342.1		ESYT3	SHCBP1	CD276	ADAM28	GREB1		MTHFD2	SLC31A1	EIF2S1		PGR	EGFR	PLB1	SNX17		EP300	TSC2
ZNF880		ESYT3	SCAI	AL160314.1	MAP3K13	GREB1		SLC30A7	LRRTM4	TMEM229B		LIPG	CCDC91	PLB1	ENOPH1		MRPL49	TSC2
NUP107		PIK3CB	MID2	ADAMTS5	SMAP1	GREB1		UBP1	HNRNPH3	TMEM229B		DCDC1	ZNF385B	PLB1	QKI		BTBD7	TSC2
OR8D4		PIK3CB	ZNF589	TIFAB	NSD1	GREB1		OLFML2A	SPIDR	TMEM229B		GPR34	FGF5	PLB1	HLCS		RRN3	TSC2
PDE8A		PIK3CB	ZNF689	MAVS	MBD2	GREB1		SERP1	STRADB	TMEM229B		RSPH4A	MAGEB4	C2orf71	MIER3		JARID2	TSC2
POLR2C		PIK3CB	TMLHE	METTL21A	MYO5A	GREB1		TMCO1	ASPH	ARG2		RILPL1	ANKRD50	C2orf71	CCDC117		CPM	TSC2
OLFML2A		FOXL2NB	IGFBPL1	DDHD1	ALX4	GREB1		FAM70A	MAGOHB	ZFYVE26		CSNK2B	SOX1	CLIP4	LYRM7		NACC2	TSC2
ZNF607		FOXL2NB	ATP10D	SORD	SLC1A2	GREB1		SMCHD1	CDC42SE1	RAD51B		PDE4DIP	PRDM8	CLIP4	C4orf40		ZNF467	TSC2
ST6GALNAC3		PRR23C	ZNF81	FADS1	FAM46C	LPIN1		NMNAT2	XPO4	ACTN1		PTCD2	PNPLA8	CLIP4	RBM4		TP53TG3B	TSC2
ALKBH1		NMNAT3	TMTC2	CRX	HOOK3	LPIN1		ANKRD32	B3GALNT1	ACTN1		CTD-2140B24.4	TRIM31	CLIP4	PARPBP		DGCR2	PKD1
JMJD6		NMNAT3	TAF1B	B3GAT3	ATP1A2	LPIN1		PDGFC	TRAPPC6B	ACTN1		RERGL	RWDD4	CLIP4	PPP4R1L		NUP210	PKD1
LL22NC03-75H12.2		NMNAT3	GLIPR2	MCAM	GNL3L	LPIN1		MRVI1	LRCH2	EXD2		TFAP2E	ADH7	CLIP4	BRI3BP		UBE2O	RAB26
ALDH1B1		NMNAT3	TTC28	MGRN1	LARP1B	TRIB2		NUBPL	HLCS	EXD2		CYB5R4	UGT3A1	ALK	QPCTL		ZNF786	RAB26
TRIM65		NMNAT3	MMACHC	DHFR	SCN8A	NBAS		ZC4H2	ZNF557	GALNT16		GOLPH3	C11orf53	ALK	SLC16A7		XXYLT1	RAB26
RAD51AP1		NMNAT3	ZNF638	KDELC2	RASSF5	FAM49A		SPIN1	BLOC1S6	GALNT16		U2SURP	SECTM1	ALK	TAOK1		AFTPH	RAB26
FAM179B		NMNAT3	TRAK2	ARFIP2	CYTH3	RAD51AP2		THAP6	C2orf42	GALNT16		C2orf47	COL4A3BP	YPEL5	GTF2H2		RPS6KA3	TRAF7
ZHX2		NMNAT3	DBT	WDR92	PAQR5	RAD51AP2		RCOR1	CLEC2D	SLC39A9		LSM6	TEX30	YPEL5	C2orf50		CBX5	MLST8
ELOVL5		NMNAT3	TOR1A	APOPT1	IGF1R	SMC6		SYT14	SETX	SLC39A9		TMEM67	VPS36	YPEL5	SPCS2		CTSC	MLST8
TMEM169		NMNAT3	WDR47	VMAC	MOG	SMC6		SENP6	RFTN1	SLC39A9		DUSP12	NCOA6	YPEL5	AC135178.1		DFFA	MLST8
ARHGEF3		TRIM42	LCORL	UACA	LRRC45	GEN1		KLHL12	ENAH	SLC39A9		PAPD7	RUNX2	YPEL5	FUT9		KLF2	MLST8
SNHG16		TRIM42	BZW1	NUBPL	MYO1D	NT5C1B		ZDHHC22	PTCHD1	SLC8A3		CHMP5	CELF1	GALNT14	RP11-268J15.5		PRMT6	MLST8
NANP		SPSB4	FLJ45079	UBN1	DDAH1	TTC32		WDHD1	GABRA6	SLC8A3		CCT5	ARHGAP21	GALNT14	SMIM14		RTN4RL1	MLST8
PRRC1		GRK7	MAP4K5	LRP2BP	ATP11B	WDR35		CCND1	DDX60	SLC8A3		FBXO25	TPD52L2	GALNT14	AADACL4		KIAA0556	MLST8
TTPAL		TFDP2	GAPT	PTRF	SPTSSA	WDR35		ZXDB	ALDH1A3	SLC8A3		ZNF184	GIPC2	CAPN14	MTMR9		CCSER2	MLST8
PQLC3		TFDP2	SHISA6	TMEM40	PSTPIP2	WDR35		SLC16A6	RALYL	SLC8A3		THOC7	ANKRD20A4	XDH	ASB15		AKAP13	MLST8
GOLGA8B		TFDP2	IRAK1	ZNF148	PDLIM5	WDR35		RPGRIP1L	CA3	SLC8A3		LRP12	KIAA1549L	XDH	CLIP4		CYP1A1	E4F1
ARFIP1		TFDP2	TM4SF18	SIM1	NFYC	SDC1		GAA	DCP2	ADAM21		MARK3	MUM1L1	MEMO1	SP110		SLC22A5	E4F1
CAP2		TFDP2	GAB1	ZBED1	FUBP1	SDC1		HRK	XG	ADAM20		APEX2	ADAT1	SPAST	DHRS7		E2F7	E4F1
HSD17B13		TFDP2	NTPCR	C14orf105	MPP5	PUM2		DPH3	SLC16A12	MED6		ZNF788	PYROXD1	SPAST	KLRC3		ABAT	E4F1
ZNF630		TFDP2	NEBL	RAPGEF5	TMEM2	PUM2		MAB21L1	CREBL2	MED6		C4orf50	ATMIN	SPAST	ABHD6		SMC1A	E4F1
HIST1H2AG		TFDP2	LSG1	SHROOM3	GRIK2	PUM2		SOX5	NLRP11	MED6		ZNF133	GAB3	SLC30A6	TXNDC9		RBM15B	E4F1
CKAP2L		GK5	TMEM261	PPCDC	MMP10	PUM2		NT5C2	TNNI1	MED6		ZNF569	ATP6V1C2	SLC30A6	PHF7		IGFBP3	E4F1
ELP4		GK5	METTL4	C22orf45	RAB11FIP4	PUM2		SHROOM3	MOCS1	PCNX1		HLA-DOA	PTPN12	SLC30A6	HIST1H2AK		RHOU	E4F1
H2AFV		ATR	PAPPA	FAM219A	FRYL	RHOB		CDHR1	DNAJC8	PCNX1		LACC1	TRDN	SLC30A6	ACSL4		THRB	DNASE1L2
PARD6B		ATR	LEPREL4	SNX20	SH2B3	HS1BP3		SLC7A1	SH3GL1	PCNX1		PRDM1	IKZF2	SLC30A6	GNA13		CDK13	DNASE1L2
ARL3		ATR	CCDC120	ANKS6	UBE2B	GDF7		METTL21A	EIF4E3	PCNX1		ADARB1	FER1L5	SLC30A6	GTF3C6		PEX2	DNASE1L2
SLC15A5		ATR	FMNL2	BCL2L11	PTBP2	LDAH		ADRB2	ZNF692	SIPA1L1		MS4A7	EIF4G3	SLC30A6	LACTB		ZDHHC20	DNASE1L2
REEP5		ATR	MIPOL1	KIAA1377	ELOVL5	LDAH		JAM2	MIER1	RGS6		HIST1H2AE	MTMR3	SLC30A6	AP3S2		PCDHAC1	ECI1
RPA4		PLS1	MAP3K9	GNB4	FSD1L	LDAH		SENP2	IGSF1	RGS6		S100P	GNA12	SATB2	ENDOD1		HMGB1	RNPS1
TANK		PLS1	ARHGAP42	DNAJC27	LIN28B	LDAH		PLEKHG4B	SERF2	RGS6		NR5A1	TGFA	MORC3	GSR		TNFRSF11A	ABCA3
MAGEA2		PLS1	PAK1	CYP4F3	USP32P2	LDAH		EPN2	VGLL3	RGS6		MFSD12	ATP6V1C1	HLCS	SLC15A2		EARS2	CCNF
GLYAT		U2SURP	CENPI	C15orf52	IPO5	LDAH		GNB4	ZKSCAN8	RGS6		ENO3	GPM6A	HLCS	TSC2		NSD1	TEDC2
SMURF2		U2SURP	VASH2	LHX4	RASAL1	APOB		ITGB1	TOP1	RGS6		ULK1	ZNF320	HLCS	GJB6		NIPA1	TEDC2
CCDC140		U2SURP	LHFPL2	TSPEAR	KLF10	TDRD15		CSNK1G1	TOMM70	RGS6		TEF	PRRX1	TTC3	C15orf62		NCOA4	NTN3
TMEM200A		U2SURP	PHTF2	ZNF343	EPHA5	ATAD2B		ACTR2	STX17	RGS6		PNPO	AP2B1	TTC3	YIPF6		BACH1	NTN3
FRMD3		SLC9A9	SF3B1	AC006486.1	NEO1	ATAD2B		TIFAB	ENDOD1	RGS6		KIAA2013	GPX8	TTC3	RP11-758M4.1		CEP104	TBC1D24
RP5-1021I20.4		SLC9A9	DSC2	ST6GAL1	ELAVL1	UBXN2A		ATP6V1E1	LRRC40	RGS6		RAPGEF1	KCTD12	TTC3	SPAG16		TCF25	TBC1D24
C7orf13		PLOD2	CPSF4L	SHROOM1	MS4A1	UBXN2A		AKAP12	USP18	DPF3		GAPDHS	TARSL2	VPS26C	RAB3B		KIAA0513	TBC1D24
GABRA5		PLOD2	ZNF558	MYOM3	KMT2B	ITSN2		ACOT9	TRPS1	DPF3		C16orf52	ATG12	VPS26C	ZNF573		SUMO3	TBC1D24
FAM63B		PLSCR5	TGIF2	MTHFD2	WIPF1	ITSN2		CHURC1-FNTB	MKRN1	DPF3		PAX3	IQUB	VPS26C	MCIDAS		HNRNPU	TBC1D24
PTN		ZIC4	CHST2	SULT2A1	GLCCI1	ITSN2		ITGA9	ITGA10	RBM25		PHF16	ZBTB41	VPS26C	TOMM5		MAPK11	ATP6V0C
CYP4F3		ZIC4	SOBP	C12orf76	TFB1M	ITSN2		ATG12	PMP22	PSEN1		SERPINB13	CCND3	DYRK1A	ANKRD28		TBC1D8	ATP6V0C
C9orf64		ZIC4	MPLKIP	HES6	INSM2	ITSN2		FAM222B	AMACR	PSEN1		NPVF	ZNF571	DYRK1A	GAS2		ABCA13	ATP6V0C
RICTOR		ZIC4	MAGOHB	C3orf71	BNC2	NCOA1		SNHG16	DSC3	PSEN1		AC069154.2	DDX17	DYRK1A	IL15		MYO1C	AMDHD2
TMEM26		ZIC1	PPARGC1A	KCNH6	KLHL42	NCOA1		VIL1	ELMO2	PSEN1		SLC2A2	CLCA4	DYRK1A	KLF9		RIN2	AMDHD2
ZBBX		ZIC1	TBC1D9	CHURC1	SLC43A2	NCOA1		SLC37A3	GNA13	PAPLN		TGDS	LONRF1	DYRK1A	PGS1		SHISA5	AMDHD2
HTN1		ZIC1	CCDC74A	TMEM120B	SCN4B	CENPO		DNER	UBR1	PAPLN		SLC41A1	MYO5C	DYRK1A	GSK3B		SLC5A3	AMDHD2
CCDC89		ZIC1	ARRDC4	FAM154B	PRKG1	CENPO		ZCCHC14	C18orf54	NUMB		CEACAM1	TOR1AIP1	DYRK1A	PAIP1		GINS4	PDPK1
PTPN1		AGTR1	TTC30B	ZNF33A	ATP6AP2	ADCY3		TIMELESS	MLEC	NUMB		DNAJA2	ZKSCAN8	DYRK1A	TAB3		BDKRB1	PDPK1
TC2N		AGTR1	ZBTB43	C22orf26	DDX46	ADCY3		ZC3HAV1	DRP2	NUMB		POP5	FBXW11	DYRK1A	FGD6		RGPD5	PDPK1
BBC3		AGTR1	TRIM68	SPIN1	CLIC4	ADCY3		SLC4A4	ZNF536	NUMB		MAGEA9B	ZNF518A	KCNJ6	RTCA		SMU1	PDPK1
BARHL2		AGTR1	GRHL2	DGCR6L	SPRYD7	DNAJC27		IFNGR2	SLC12A2	HEATR4		FABP4	COL4A3	PCNX4	CCDC83		CLSTN1	PDPK1
ING3		AGTR1	PPAP2B	C7orf13	TRAK2	DNAJC27		EIF1AD	OTULIN	HEATR4		MAGEA9	HSPA12A	DHRS7	CDH7		NOL4	KCTD5
COL9A1		AGTR1	C17orf103	CES4A	PNPT1	DNMT3A		FHOD1	FGF23	RIOX1		PAOX	USP12	DHRS7	DGKE		FCRLA	KCTD5
ST6GALNAC2		AGTR1	COL4A3	BPNT1	RDH11	DNMT3A		TRUB2	TTF2	DNAL1		GATA5	GFRA1	SIX4	ZNF7		PMPCA	SRRM2
UTP23		AGTR1	NOL9	NAA16	FAM120A	DNMT3A		CALCOCO2	CADM2	DNAL1		MUC22	CCNT2	TRMT5	SULT1C4		STARD13	ELOB
C22orf34		HLTF	KIF26B	SLC37A3	ZCCHC24	DNMT3A		STX3	EHD1	PNMA1		TNFSF14	PECR	SLC38A6	POU4F1		ACAP2	PRSS33
OR4F3		HLTF	CPEB4	CYTH1	TRAPPC10	RAB10		GNPNAT1	SPTLC3	ELMSAN1		ARID1A	PGR	SLC38A6	SLC9B2		EPHA4	PRSS41
ZNF33A		HLTF	DPP8	AC003102.1	NTRK2	RAB10		PPARGC1A	ZC3H11A	ENTPD5		COLEC12	PAQR3	SLC38A6	EEF2K		ZSCAN22	FLYWCH2
SMC2		HLTF	DNAJA1	NR2E1	DAPK1	GAREM2		AC024563.1	IGSF10	ENTPD5		GYS2	TMTC1	TMEM30B	TTPAL		PLEKHM3	FLYWCH2
GOLGA8IP		HLTF	MEMO1	FBXO31	OPA1	GAREM2		AF127577.1	ZBTB14	BBOF1		ACTC1	RBMXL1	TMEM30B	GUCY1A2		SRSF3	FLYWCH2
SPCS3		HLTF	MED29	SFTPB	G6PC	GAREM2		TGFBRAP1	SLC35E2	LIN52		CHAMP1	VEZT	PRKCH	C15orf38-AP3S2		KSR1	FLYWCH2
NT5C2		HLTF	SCRG1	MEGF10	KRT38	GAREM2		SPCS3	RAG1	VRTN		LMCD1	KALRN	PRKCH	TRIM33		ZFX	FLYWCH1
PKIB		HLTF	TSPYL5	AC108463.3	DNAJB12	HADHB		POC1B-GALNT4	VAMP4	ISCA2		PRCC	PCDHB4	KCNH5	ONECUT2		ARIH1	FLYWCH1
GCM2		HLTF	ZNF347	NCAM1	CTAGE9	HADHB		DDX20	ZNF667	ISCA2		TDP1	ARMCX3	KCNH5	PARVA		PCSK5	FLYWCH1
SLC6A5		HLTF	NKAIN1	KIAA0556	MITF	HADHB		LPPR5	SAMD8	LTBP2		TBC1D15	RNF149	GPHB5	MAML2		GSTM3	FLYWCH1
PRKAA2		HPS3	IFNLR1	MAST3	PCDH18	HADHB		SLC7A6	SLC15A2	LTBP2		BAG4	HDAC2	PPP2R5E	ATF1		AGPAT5	KREMEN2
TBL1XR1		HPS3	ITGB3	BRD3	RAB8B	HADHB		CDK16	CSRNP2	LTBP2		RP11-597K23.2	IL17RD	PPP2R5E	INTU		GRSF1	KREMEN2
GTPBP10		HPS3	RPS6KA5	SIGLEC8	WIPF2	SELENOI		ABCD3	SNRNP27	AREL1		FLT3LG	TPR	PPP2R5E	PURG		FAM104A	KREMEN2
TMEM154		HPS3	SAR1B	PACS1	LPP	SELENOI		PTPLAD2	KCTD2	AREL1		MADD	TKFC	PPP2R5E	TNFAIP8		RNF169	KREMEN2
SLC1A2		CP	ZNF189	ARSB	FAM49B	OTOF		COL9A1	DDX5	FCF1		TMEFF2	CCDC186	SYNE2	SMAP2		FZD1	PAQR4
SH3BGRL2		TM4SF18	FKTN	WNT3A	AZIN1	OTOF		MYCN	SOS1	FCF1		IL6	NPAS3	SYNE2	ERMP1		ACTR1B	PAQR4
CBX5		TM4SF18	AKAP10	C10orf54	DPYSL5	OTOF		PIK3C2A	ZBTB49	YLPM1		PINK1	GOLGA8A	SYNE2	CUX1		PPP4R4	PAQR4
ZNF585B		TM4SF18	NPY2R	SYT5	ZC3H12C	OTOF		SMC2	GDF6	YLPM1		CPOX	NT5DC1	SYNE2	CHMP5		NXPE3	PAQR4
SLCO4C1		TM4SF18	MKRN1	PADI1	SEMA6D	OTOF		GMCL1	MZT1	YLPM1		STK24	PLCL1	SYNE2	SLC37A1		PPARGC1B	PAQR4
ACAP2		WWTR1	TULP4	WDR37	ZBTB44	CIB4		NFIC	MRPL19	YLPM1		GRIA4	ZNF682	SYNE2	DHFR		PDXK	PAQR4
ZFP14		ANKUB1	CEP135	SPTBN4	ADGRL3	KCNK3		PAPLN	RASSF6	YLPM1		F13B	ABCA12	ESR2	PDZK1IP1		KLHL31	PAQR4
FREM2		ANKUB1	FGF12	ERCC2	FYN	KCNK3		ARHGEF40	PCDH11X	YLPM1		GIMAP8	ERLEC1	ESR2	ANKRD6		UTP15	PAQR4
RFX3		ANKUB1	PCNX	DPYSL3	CERCAM	SLC35F6		MID1	ROR2	YLPM1		POLH	PPP1R9A	ESR2	DST		CACNA1A	PAQR4
PTCHD1		RNF13	ZBTB10	PHPT1	BRK1	DPYSL5		FABP2	GOLIM4	YLPM1		NRXN1	CACUL1	ESR2	ABCB10		ADAMTS16	PAQR4
CCSAP		RNF13	QRSL1	ATP6V0B	HAS2	DPYSL5		SF3B5	IL33	RPS6KL1		AACS	HBS1L	ESR2	ANKRD13C		HCN4	CLK1
AC009237.1		RNF13	JAM2	TMEM130	NYAP2	DPYSL5		TBC1D4	TNFSF8	RPS6KL1		RBMY1J	SUSD5	ESR2	MUC19		OLFM1	NIF3L1
RAB33B		PFN2	ACOT9	BAIAP2	NOL4L	TMEM214		TMSB15B	TP53TG3	MLH3		UPF3A	PSMD10	ZBTB25	GORASP1		URM1	NIF3L1
CCDC113		PFN2	HLA-DOB	MOCOS	PKD2	TMEM214		ELF4	PRKAB2	MLH3		PKDREJ	TDRKH	ZBTB25	TIMM17A		RPL32	ORC2
C1orf116		EIF2A	ZNF555	COMMD9	EPN2	TMEM214		SLC9A4	SYNM	NEK9		MIXL1	ALX1	AKAP5	BOLL		LRIG1	FAM126B
EML5		EIF2A	PEG10	C17orf102	ZNF680	AGBL5		SF3A1	MTDH	FLVCR2		SIAH2	CHCHD1	ZBTB25	ZDHHC7		WDR5	NDUFB3
ZNF208		EIF2A	NR2C1	ARPC5L	LMO7	KHK		TMEM200A	WDR26	FLVCR2		PSG4	PPRC1	PPP1R36	NUF2		PTK2B	NDUFB3
KIAA1324L		EIF2A	GPR83	CHD4	GCC2	TCF23		SOGA1	ATP6V1E1	IFT43		PBOV1	ELOVL4	PLEKHG3	ZDHHC21		DDX31	NDUFB3
NUS1		EIF2A	MAFG	CYP27B1	PRELID3B	SLC5A6		PDE7B	CPT1A	GPATCH2L		CENPC1	DSC3	SPTB	KIAA1456		BCORL1	NDUFB3
STAT3		EIF2A	CPM	GJC1	FGF9	ATRAID		GOLPH3L	SLC26A7	GPATCH2L		MAPRE2	RNF19A	SPTB	PPM1L		LRRK1	CFLAR
SAR1B		EIF2A	FER	PPP4R1L	WDCP	ATRAID		RFWD3	SIK2	ESRRB		RBMY1E	KCNA4	SPTB	PLA2G4A		SORBS3	CFLAR
LRRC19		SELENOT	C6orf89	POFUT1	RASSF3	CAD		CCPG1	CREG1	ESRRB		B3GNT5	GSAP	SPTB	LRAT		RNF19A	CFLAR
PAX5		MINDY4B	KLRC4	OTX1	LIFR	DNAJC5G		EDNRB	NR2F2	ESRRB		E2F8	SULT4A1	SPTB	CBR4		DVL3	CFLAR
ZNF814		MED12L	B3GALTL	TMEM201	TSHR	DNAJC5G		RGR	SPRYD4	ESRRB		C14orf28	TET3	MAX	FAM122A		CYLD	CFLAR
TRIM66		MED12L	VTI1A	RIMS4	ZNF197	DNAJC5G		TCF7L2	HIF1AN	ESRRB		CCDC171	MSX2	MAX	IL6ST		ELF2	CASP10
ARHGAP1		MED12L	TYRP1	PRKX	MOSPD1	DNAJC5G		DCAF16	PSME4	VASH1		CEACAM6	SPOCK2	MAX	MIER1		TBC1D5	CASP10
RPS24		P2RY14	SLC4A4	PTPLAD2	ZNF74	SNX17		C2orf44	CSF3R	ANGEL1		RORB	CNTNAP2	MAX	SRSF6		AMDHD2	CASP10
TRIM59		P2RY14	SEH1L	SLC6A12	PODXL	SNX17		RABEP1	IMPA1	IRF2BPL		UBL4A	GOLGA3	MAX	MITF		ILF3	CASP10
GTF2E1		P2RY13	MECOM	SLFN12L	SLC31A1	NRBP1		KLHL2	CSTF3	ZDHHC22		PTEN	TAF9B	CCDC196	MFSD8		SLC7A6	CASP10
ZNF704		P2RY12	RCC2	SPRN	DENND6A	NRBP1		KNG1	RBM20	TMEM63C		CCRL2	NUDT12	CCDC196	MRPS10		TAF5L	CASP10
AFF4		IGSF10	FSCN1	SHROOM4	CCDC144A	NRBP1		ZMAT1	UBXN7	NGB		C5orf22	KDM4C	GPHN	RAB30		GPBP1	CASP10
SNX27		IGSF10	C2orf54	MAPK4	UBASH3B	NRBP1		DLG5	MITF	NGB		PDC	ST8SIA3	MPP5	RPL21		TP73	CASP10
TNS1		IGSF10	GATC	ARHGEF17	ASXL1	NRBP1		CIT	RALGAPA1	GSTZ1		EID1	ZNF596	MPP5	FERMT2		PTBP1	CASP10
KLF7		IGSF10	RNF169	TLE3	PANK3	NRBP1		ZNF337	SEL1L	GSTZ1		SPATA5L1	PPP1CB	EIF2S1	PIK3CG		REEP5	CASP10
TBC1D20		MBNL1	LRRC15	SDK1	CSMD3	KRTCAP3		FOXD4L6	SIRPA	GSTZ1		BHLHB9	MYCN	ZFYVE26	ZNF711		OSBPL6	CASP10
APC		MBNL1	FLG2	FAM160B1	SYT4	KRTCAP3		NRP1	RRAS2	GSTZ1		DEDD	MRPL44	ZFYVE26	ABCD2		GINS3	CASP10
SMAD3		MBNL1	LTBP2	FAM222B	YPEL3	KRTCAP3		ICOSLG	WASHC4	TMED8		FHL1	GOSR2	ZFP36L1	KIAA1549L		RFLNB	CASP8
APPBP2		MBNL1	HHIP	WDR5	POLA1	GCKR		MAST4	GULP1	TMED8		FASLG	MAPK8	ACTN1	LCA5		DSTYK	CASP8
FRMD8		MBNL1	TMEM129	DYRK1B	MYNN	GPN1		ANGPTL3	ASXL3	NOXRED1		CLUL1	YWHAZ	ACTN1	NEUROD4		SOX2	CASP8
TAL1		RAP2B	DACH1	DHX36	ACVR1C	GPN1		SEPSECS	BTBD11	VIPAS39		NOP2	FAM168B	ACTN1	HAUS6		TMEM206	CASP8
DAGLA		ARHGEF26	CDK17	ZNHIT1	CHD2	GPN1		ZNF259	SEPHS1	VIPAS39		CYP3A5	RABGAP1	DCAF5	DKFZP434E1119		ZCCHC11	ALS2CR12
HCN1		DHX36	CLSTN1	FLNC	RORA	GPN1		PRUNE2	AKAP6	VIPAS39		ZNF558	BDNF	DCAF5	ZNF81		DNAJA2	ALS2CR12
C10orf85		DHX36	ADAL	ATP7A	CADM1	SUPT7L		CLDN7	SYNRG	VIPAS39		RPF2	RPIA	DCAF5	SLC23A1		SULF2	ALS2CR12
CAMSAP2		DHX36	AL117190.3	GGT6	WNT5A	SUPT7L		PPIG	NEDD4	VIPAS39		UPK1B	CACNA2D3	DCAF5	UNC13C		NEK6	TRAK2
TCTN2		DHX36	EPHA3	CCL5	STRN3	SUPT7L		ZNF449	KBTBD11	VIPAS39		EIF3D	ZNF518B	DCAF5	LIN28B		HOXB6	STRADB
HNF4G		MME	CLN8	EFCAB11	ERLIN1	SUPT7L		SLC35E3	TMEM136	VIPAS39		CTR9	PDPR	EXD2	KMO		AHCTF1	STRADB
MRPS25		MME	STEAP2	PREX2	PICALM	SUPT7L		LIFR	TTF1	VIPAS39		RP11-173D9.3	EIF2S3	EXD2	TANC2		KIF3A	C2CD6
DFFA		MME	ARHGEF6	HERC6	AK2	SUPT7L		UHRF1BP1L	COL4A1	VIPAS39		SPINT4	BTN1A1	EXD2	CACNA1E		TSHZ2	C2CD6
SSH1		MME	CUL4A	FAM70A	TAB2	PPP1CB		VPS72	USP15	VIPAS39		NMUR1	EPG5	EXD2	RAB27B		FAM46A	C2CD6
IRAK3		MME	CHD2	N4BP1	NUMA1	TOGARAM2		CPSF2	HACD1	AHSA1		C5orf47	RRM1	EXD2	UNC5B		CMTM4	C2CD6
RAB18		PLCH1	PCDH9	BASP1	PDGFC	CLIP4		RHOBTB3	PIH1D3	ALKBH1		HNRNPR	UBL3	GALNT16	NRXN1		RHOBTB3	C2CD6
ORAI2		PLCH1	ZNF41	MAP3K1	SYN2	CLIP4		TRIM25	CD274	ADCK1		RAB6A	GNG7	GALNT16	NFIA		DENND1B	C2CD6
DTX3L		PLCH1	PELI1	PLAGL2	SYT16	CLIP4		KLF17	IL24	NRXN3		HMGXB4	DDX58	SLC39A9	NAIP		SLC22A3	C2CD6
FMN1		PLCH1	KCNJ6	PPFIA4	ELMO1	CLIP4		C1QC	GNG12	NRXN3		CLDN16	TOMM70	SLC39A9	HES2		ASAH2	C2CD6
ZNF805		SLC33A1	LPP	AL078633.1	CHD1	CLIP4		C1orf50	SELENOK	NRXN3		TFF2	POLH	SLC39A9	RNFT2		PUS1	TMEM237
NOVA1		SLC33A1	TANGO2	RP11-111H3.1	PLEKHO2	ALK		AP5S1	SLC25A30	NRXN3		TRIM49C	PIKFYVE	SLC39A9	CHL1		DNAJB12	TMEM237
SGPL1		GMPS	PSD3	IQGAP3	KAT6A	YPEL5		ST13	SMIM5	NRXN3		C17orf105	PLEKHM3	SLC39A9	PCDHB4		VHL	TMEM237
MMS22L		KCNAB1	EPHA4	ZNF512B	DNAJB9	YPEL5		BET1	PAPSS1	GTF2A1		CYB5R2	DCX	SLC10A1	NPY2R		OGT	MPP4
RFT1		KCNAB1	ZBTB5	PNKD	STRADB	YPEL5		MRPL30	TMTC1	GTF2A1		WDR72	GULP1	SLC8A3	THSD4		ZNF37A	MPP4
ARHGEF15		KCNAB1	FAM216B	PARP11	ASPH	YPEL5		ARHGAP10	SKA2	SEL1L		MAFK	RAB22A	SLC8A3	NLRC3		DNMT3B	MPP4
MPP5		KCNAB1	FBXO32	LDHC	SH3BGRL2	YPEL5		ZNF474	KLK7	SEL1L		UBFD1	WNT5A	SLC8A3	FCRL4		KIRREL1	MPP4
FAM46A		KCNAB1	LGR5	PKNOX2	SORBS1	YPEL5		SEMA3C	KLHL20	GALC		ZNF287	SASH1	SLC8A3	SLCO5A1		COPA	MPP4
PARVA		KCNAB1	C6orf141	KIAA1147	LAMP2	YPEL5		FAM117B	GOLGA8EP	KCNK10		IL2RB	SV2B	SLC8A3	JAKMIP3		CAMSAP2	MPP4
ATM		KCNAB1	FAM196B	TP53AIP1	MRRF	GALNT14		RUNDC1	FADS1	KCNK10		BET3L	FOXA1	SLC8A3	RORB		PIK3R1	MPP4
ACSBG1		KCNAB1	FAM110C	C10orf76	FAM46A	GALNT14		FOXA1	MS4A2	KCNK10		SNX10	GJA4	SLC8A3	ZIC4		BCAP29	ALS2
RAB27B		KCNAB1	UHRF1BP1	FBXL7	RAP2A	XDH		WDR35	IGDCC4	KCNK10		NUP133	KIAA1143	SYNJ2BP-COX16	BSN		OSBPL1A	CDK15
2020-03-01		KCNAB1	ABCA5	GMCL1	KCTD16	SRD5A2		KDM3B	MEF2D	PTPN21		POLR1B	KLF7	SYNJ2BP-COX16	RASEF		SPECC1L	CDK15
PIGZ		KCNAB1	PPARA	LOX	MYLK	MEMO1		SLC30A4	SCML1	ZC3H14		ZNF682	C9orf47	SYNJ2BP-COX16	CACNG4		STIP1	CDK15
TRMT61A		KCNAB1	ZNF749	C3orf52	DBT	MEMO1		C1orf115	FLRT2	ZC3H14		CBS	PDYN	SYNJ2BP-COX16	ACSBG1		PRKCE	CDK15
CFL2		KCNAB1	LRRC40	CBX7	RIC3	MEMO1		C11orf1	MTCP1	EML5		MEIG1	COCH	COX16	ADAP2		TMEM184B	CDK15
HECA		KCNAB1	TSHZ3	CSNK1G1	C16orf52	SLC30A6		HGD	ALG10B	TTC8		PXDNL	GSDMA	SYNJ2BP	GAB3		HMGB3	CDK15
AK4		KCNAB1	KCNJ3	TBC1D10B	SIPA1L2	SLC30A6		RFESD	GLS	TTC8		C9orf38	LOX	TTC9	ZNF674		ATP6V0A2	CDK15
CXorf36		TIPARP	ADAM17	C14orf1	CDH13	SLC30A6		C3orf32	CLCC1	TTC8		SPTY2D1	RCHY1	MAP3K9	TMEM213		P4HA3	FZD7
PPP3CA		TIPARP	TAOK3	AC074091.13	PLCD4	SLC30A6		ARFIP2	NSUN2	TTC8		SDE2	GSR	MAP3K9	SERPINA5		NSUN5P2	FZD7
RDH8		TIPARP	NPFFR1	ZNF562	MAP3K4	SLC30A6		PIGH	ELAC1	FOXN3		NAP1L4	SON	MAP3K9	LRRTM3		ZNF704	KIAA2012
ORC2		LEKR1	PTPRT	KRTAP5-2	CAB39L	SLC30A6		FLRT3	FOXN3	FOXN3		SVOP	TRMT1L	MAP3K9	HMHA1		E2F4	KIAA2012
UAP1L1		CCNL1	GLRA3	XRRA1	ARHGAP29	SLC30A6		BCL11A	CPSF6	FOXN3		RNPC3	ANKRD20A1	MAP3K9	RUNX2		ATAD2B	KIAA2012
ITPRIPL2		VEPH1	LDLRAD3	SSPN	GULP1	SATB2		RP11-93B14.6	KCNMA1	EFCAB11		GNG12	TRIM25	MAP3K9	IL22RA2		PPP1R12A	SUMO1
CD99L2		VEPH1	STXBP6	MRPS21	TMEM30A	FTCDNL1		RAN	LIN54	EFCAB11		APOA5	SYAP1	MAP3K9	ZNF664		NEFH	SUMO1
FRA10AC1		PQLC2L	TRIM71	BBC3	SMYD2	DOPEY2		CARTPT	G2E3	TDP1		GTDC2	PURG	MAP3K9	SHISA9		SYDE1	SUMO1
LILRB4		PQLC2L	AL021546.6	ATL3	JAK1	MORC3		POLR2C	TBX4	TDP1		PA2G4	SMIM13	MAP3K9	COL21A1		CTDSP1	SUMO1
RASGRF2		SHOX2	KIAA0226L	CLDN7	CLN6	MORC3		TRIB2	NR4A2	KCNK13		NACA2	PMCH	MAP3K9	ARHGAP17		CBS	BMPR2
STAM2		SHOX2	NBR1	ANKRD13B	ATAD2B	HLCS		RAP1A	CCNJL	NRDE2		PHKG2	TMEM99	MAP3K9	KLHL31		SNAP47	BMPR2
PPFIBP1		SHOX2	DUSP5	WDR73	FAM208A	HLCS		DPPA4	OTUD7B	CALM1		MAGEB10		MAP3K9	VAV3		HLA-G	BMPR2
ANO5		RSRC1	DBX2	C2orf44	UBR3	HLCS		PLAGL2	FAM46C	CALM1		SCN9A		MAP3K9	TIFAB		COX20	ICA1L
RAMP3		RSRC1	RP5-850E9.3	PLEKHA6	STOX2	HLCS		RAB34	TSTD2	TTC7B		ABHD5		PCNX1	HNF4G		SYNPO2	WDR12
EIF5A2		RSRC1	CTDSPL2	RABEP1	TOX	TTC3		CTDSPL	KCNJ15	RPS6KA5		VWA8		PCNX1	KIF3C		CASKIN1	WDR12
CBLB		RSRC1	ACVR1C	KAT6A	DCDC2	TTC3		RALA	AGO2	RPS6KA5		RBMXL3		PCNX1	CSNK1G1		NCOR2	WDR12
TRIM40		GFM1	ZBTB25	COLQ	LIN7C	DYRK1A		FAM175A	SERPINB13	RPS6KA5		AC110619.2		PCNX1	HEY1		SPTLC2	CARF
PLEKHA1		GFM1	ATXN1	KCNJ12	BACE1	DYRK1A		TAF3	ZNF330	DGLUCY		RP11-625H11.1		PCNX1	MYO5B		ZIC4	CARF
SHISA7		GFM1	TMEM184A	ACOT9	RUNX1	DYRK1A		PDPK1	C4orf46	DGLUCY		NUP155		PCNX1	MACROD2		PHF21A	CARF
TRPS1		GFM1	CLNK	CCR9	MKLN1	DYRK1A		WASF1	TESK2	DGLUCY		C3AR1		PCNX1	DCLK3		RMDN1	CARF
N4BP2L1		GFM1	HCN1	C11orf1	ERC2	DYRK1A		TPP1	DYNC1I1	DGLUCY		HES7		PCNX1	KIAA0907		SEC14L2	CARF
EYA3		RARRES1	SLC4A10	PEAK1	DOK5	DYRK1A		FNBP1L	SLC4A10	DGLUCY		ARX		PCNX1	TP53INP2		SERPINA3	CARF
CADM1		RARRES1	CDH17	MLH3	SYT2	DYRK1A		DNMBP	SIRT1	DGLUCY		LAPTM5		SIPA1L1	GABRB2		DERL1	CARF
ZNF618		MFSD1	TTC33	FATE1	SLC24A4	DYRK1A		SEC14L6	ZNF518A	DGLUCY		TAF9B		SIPA1L1	FAM65B		KLHL21	CARF
GYS1		MFSD1	TCTEX1D1	USP49	FAM45BP	DYRK1A		RLF	AGPS	DGLUCY		FBXO9		SIPA1L1	MRC1L1		GABBR1	CARF
RGP1		MFSD1	CPEB3	GOLPH3L	CEP76	DYRK1A		JAG1	FAM129A	DGLUCY		MT1A		SIPA1L1	GABRA4		SMARCA2	CARF
CUX1		MFSD1	FUT10	CMTM6	GLYATL1	DYRK1A		ZNF673	PLOD2	DGLUCY		ZNF143		SIPA1L1	SHROOM4		ZDBF2	CARF
TMEM18		SCHIP1	IMPAD1	DPF3	MKRN1	DYRK1A		NOL9	LDB3	DGLUCY		NAPEPLD		SIPA1L1	HTR2A		SH3BP4	CARF
CYFIP1		C3orf80	NCAM2	GAMT	TCEA1	DYRK1A		TMEM11	PKD2	DGLUCY		XBP1		SIPA1L1	CTB-186H2.3		FAM91A1	CYP20A1
RP11-429E11.3		C3orf80	LGSN	GANC	PDCD1LG2	PCNX4		TTPAL	SMAD4	DGLUCY		ZNF438		SIPA1L1	MRC1		ASH1L	CYP20A1
C1orf216		KPNA4	HNRNPA2B1	PPP2R2C	TNFRSF19	PCNX4		FAM205A	C2orf73	DGLUCY		RBM11		SIPA1L1	TMEM154		KDM6B	RAPH1
GALNT6		PPM1L	ZNF587B	TCN2	LRRTM3	PPM1A		GABRG2	CNTNAP2	CCDC88C		ZNF222		RGS6	TEDDM1		RARRES1	RAPH1
CASC5		B3GALNT1	CACNA2D1	STAR	CNTNAP3B	PPM1A		NRCAM	PPHLN1	CCDC88C		FOXI2		RGS6	DACH1		KIAA0040	RAPH1
SLITRK4		B3GALNT1	PHC3	AQP1	NOTCH2	PPM1A		APLP2	ANKRD52	PPP4R3A		PIWIL3		RGS6	MYZAP		LHX1	CD28
RRP7A		B3GALNT1	SERPINB9	COL18A1	USP9X	PPM1A		POMT1	CROT	PPP4R3A		NDUFC2		RGS6	CLOCK		APBB2	CD28
FBXO42		B3GALNT1	UBXN7	PTPLAD1	ASB8	C14orf39		PRPF40A	RBM46	PPP4R3A		HMP19		RGS6	PDGFRA		CNR1	CTLA4
MOB3B		B3GALNT1	EIF3F	SLC35E3	RP2	SIX4		FAM179B	MCM10	CATSPERB		PLEKHH1		DCAF4	LIX1		TSHZ1	CTLA4
MAP3K2		B3GALNT1	ADCYAP1	ATP2B4	C2CD5	SIX4		TLE3	CDON	TC2N		GCKR		DCAF4	SELT		AHNAK	CTLA4
FUT4		B3GALNT1	VPS39	VN1R2	BRPF1	TRMT5		GINS1	ZNF182	TC2N		PON2		DCAF4	PWP2		SMOC1	CTLA4
NONO		B3GALNT1	P2RY2	ASB7	HDAC2	PRKCH		TMEM59L	PCDH11Y	TC2N		SMC5		PSEN1	ALKBH8		PCDHA9	ICOS
SPRYD7		B3GALNT1	CDC5L	HIPK2	CAAP1	PRKCH		EPC2	ANKRD6	TC2N		TTC38		PSEN1	MEIG1		SLC30A7	ICOS
ZSCAN29		B3GALNT1	ZBTB8B	TRUB2	CHCHD3	HIF1A		RP11-644F5.10	DIDO1	TC2N		PTK2B		HEATR4	MYT1L		MAN2A2	PARD3B
DHTKD1		B3GALNT1	FGD4	MID1	RNGTT	RHOJ		AP1M1	ZFY	TC2N		PPAPDC1A		HEATR4	ELOVL7		ZNF343	PARD3B
SLC28A1		B3GALNT1	FAM206A	SPATS2	CAV1	RHOJ		UBN2	WDFY2	TC2N		DNAJC5		HEATR4	PVRL4		ABCA3	PARD3B
MPEG1		B3GALNT1	MED13	NR1I2	ROCK1	PPP2R5E		CCDC149	NFAT5	TC2N		ISOC1		HEATR4	NOS1		ALDH4A1	PARD3B
WDR89		B3GALNT1	FAS	COL22A1	EP300	PPP2R5E		AL354993.1	ABCD3	TRIP11		GOLGA8A		ACOT1	DMC1		DVL1	PARD3B
B3GNT3		B3GALNT1	KLF16	L3MBTL2	PRRG1	PPP2R5E		INHBB	CACNB4	TRIP11		RUNDC3B		ACOT1	SPRY3		ESS2	PARD3B
MRPL49		B3GALNT1	ALX4	YTHDC2	FNBP1L	SGPP1		FNTB	MIPOL1	TRIP11		TLR7		ACOT2	SLC16A12		TJAP1	PARD3B
BAZ2A		B3GALNT1	CENPN	DERL1	STAG1	SYNE2		SMC6	ERBIN	TRIP11		SNRPA1		ACOT2	FIZ1		SYT12	PARD3B
CALM1		B3GALNT1	SLC35G1	CYTH3	TNFRSF10B	SYNE2		SLC16A4	HTR2C	TRIP11		TMED2		DNAL1	C17orf104		ZNF282	NRP2
EGFR		B3GALNT1	CDS1	DDR1	C7	SYNE2		PALMD	GRIN2A	ATXN3		CISH		DNAL1	NOL4		ECD	NRP2
LZTS1		B3GALNT1	TMEM194B	LYST	ZBTB10	SYNE2		NCBP2	GDA	ATXN3		GIN1		DNAL1	CFTR		ZBTB46	NRP2
DNAI2		B3GALNT1	AP1G1	PDE6A	TSPYL1	SYNE2		XCR1	BOLL	ATXN3		DDHD2		DNAL1	LCP2		OTUD5	NRP2
RAB31		NMD3	ARL5B	ITGB1BP1	CEP192	SYNE2		AL137145.2	FOXO3	ATXN3		FPGT		PTGR2	CELF2		LAMA1	NRP2
ARHGEF12		SPTSSB	FAM84A	KCNJ16	ATP2B4	SYNE2		CACNA2D4	ZFP14	ATXN3		DMRTC1-AS1		PTGR2	WNT3		DMGDH	NRP2
PLA2G16		SPTSSB	COQ7	PPP2R1A	KBTBD2	SYNE2		RP3-368B9.1	PRKAA2	SLC24A4		SAT1		PTGR2	CEACAM6		SSH1	NRP2
LMOD3		SPTSSB	DAPK1	AC011450.1	USP12	SYNE2		HTR2C	SRSF12	SLC24A4		LILRB1		PTGR2	APOBEC3C		EIF2AK1	NRP2
PRR3		SPTSSB	BEST1	FZD8	WDR26	ZBTB25		ZNF236	TMEM170A	SLC24A4		AGPAT4		PTGR2	PIM1		RAD18	NRP2
FAM212B		SPTSSB	GCNT1	BCL11A	USP46	ZBTB25		PRRC1	YEATS4	LGMN		SLC35G3		PTGR2	XK		ARNT	NRP2
ZNF100		OTOL1	SLC5A7	LL22NC03-75H12.2	KCNC2	PPP1R36		ZNF562	GPRIN3	LGMN		CEACAM7		ZNF410	ZFP91		SLC1A4	NRP2
MIB1		OTOL1	SULF1	CIC	PTPN20	PPP1R36		NCAM1	MACC1	LGMN		PDE6B		ZNF410	COL22A1		HMG20B	NRP2
GRM5		SI	TOX4	CCP110	KANK4	PPP1R36		C20orf72	SOCS4	LGMN		FAT3		ZNF410	NPNT		PRKN	INO80D
RBMXL1		SI	SETD7	IQCF3	DENND1B	PLEKHG3		HOPX	MPP4	TMEM38A		MPHOSPH8		ZNF410	TMPRSS4		MAT2A	NDUFS1
LTBR		SLITRK3	DIEXF	CAMK2N2	WDFY4	PLEKHG3		PRUNE	TBRG1	NWD1		PERP		FAM161B	KCNJ10		MTMR1	NDUFS1
ACACB		SLITRK3	ZFP14	HOXA13	ZNRF3	SPTB		PTH	SFXN1	SIN3B		EPB41L4B		ENTPD5	NDST3		NEUROD1	NDUFS1
SLC2A5		SLITRK3	GTF3C3	XCR1	ZSWIM2	SPTB		SNX20	GREM2	SIN3B		CDKN1B		ENTPD5	CADM2		OLR1	NDUFS1
GLYATL1		SLITRK3	STON2	AL603965.1	LENG8	SPTB		SORD	MAMLD1	SIN3B		FNDC1		ENTPD5	KLK2		ULK1	NDUFS1
SLC16A2		WDR49	MKX	MPDZ	MAP7D2	CHURC1-FNTB		APCDD1L	SSR1	F2RL3		MT1G		ALDH6A1	BEND2		COG3	NDUFS1
ZNF229		SERPINI1	SLC5A3	C3orf43	STXBP4	CHURC1		HECTD1	ASRGL1	CPAMD8		RAB11FIP3		ALDH6A1	NDE1		ZFYVE26	NDUFS1
ST3GAL2		GOLIM4	ZNF160	ANKRD65	ZNF250	CHURC1		AC145676.2	TIGAR	MYO9B		SYPL1		ALDH6A1	FLJ20373		STEAP3	NDUFS1
LIX1		GOLIM4	DRG1	AFG3L2	FUBP3	CHURC1		GANC	SACS	MYO9B		C5		VSX2	RILPL2		FAM46C	NDUFS1
DPP8		MECOM	PSPC1	LNX2	UBE2D3	RAB15		SYNRG	SGMS1	NR2F6		ABHD6		ABCD4	POM121		GORASP1	NDUFS1
ZBTB26		MECOM	GPR155	SLC4A10	TBXAS1	RAB15		BNC1	BICC1	BABAM1		NCL		SYNDIG1L	GTF2E1		SLC6A20	NDUFS1
DPH5		MECOM	SOGA2	CNPY4	EIF3I	RAB15		WNT2B	NPAP1	BABAM1		ZBTB49		LTBP2	KMT2C		C2orf42	EEF1B2
TM2D2		MECOM	IKZF2	ISCA1	PPTC7	RAB15		TMEM57	VTI1B	BABAM1		FA2H		AREL1	METTL6		SLC16A1	EEF1B2
RP4-559A3.7		MECOM	SAMD4A	NPTX1	POMT2	RAB15		CEP290	DGKE	BABAM1		PIK3CB		AREL1	DCAF12		TMOD2	EEF1B2
PCBP2		MECOM	ZNF514	SYT14	2020-09-06	RAB15		LHX4	TCERG1	ANKLE1		PJA1		AREL1	LMO3		CARF	GPR1
PM20D2		LRRC34	RND3	ZDHHC22	SPIN1	RAB15		TFAP2C	C14orf39	ANKLE1		C2CD4A		AREL1	PPP4R2		CLEC2D	GPR1
2020-09-02		LRRC34	ALG10	MTRF1L	PAXBP1	FNTB		PREX2	CLSPN	ANKLE1		C9orf66		YLPM1	SDHA		LENG8	GPR1
RP11-276H1.3		LRRC34	C2CD2L	KIAA1919	IRX4	FNTB		DHFR	AKAP13	ANKLE1		MORN2		YLPM1	PRDM5		DTX4	GPR1
FHL2		LRRC34	MARCH6	VIL1	NYAP1	FNTB		ZFYVE27	HAL	MVB12A		APOH		YLPM1	TIMM21		USP6	GPR1
GZF1		LRRC31	AVL9	ESRP2	OTUD7B	MAX		NFIB	2020-03-08	SLC27A1		C2orf83		PROX2	SLC35E1		ATPIF1	GPR1
SLC22A15		LRRC31	EPT1	PRRC1	FICD	MAX		RNFT1	SLC16A14	COLGALT1		OLA1		MLH3	EML5		PRKCI	ZDBF2
OCLN		LRRC31	AGFG1	KCNB1	ARHGEF17	MAX		GIGYF2	NEPRO	UNC13A		RWDD4		MLH3	RAPGEF1		SLC20A2	ZDBF2
LPIN3		SEC62	FBXO42	TUBB4B	KIAA0232	MAX		ARID3B	PITPNA	UNC13A		ZNF563		MLH3	FOXK1		LRSAM1	ZDBF2
SHMT2		PHC3	EXO5	SLC43A2	CPPED1	MAX		AC073082.1	RALB	MAP1S		SLC25A15		MLH3	DCAF7		ATL3	ADAM23
ZNF619		PHC3	ZNF780A	HTR5A	PCLAF	MAX		PRDM10	GFPT1	MAP1S		CDC34		MLH3	ETV5		RGS5	ADAM23
SACM1L		PHC3	ZNF703	BARD1	SGCG	FUT8		COL11A1	PKN2	FCHO1		RPTN		ZC2HC1C	CTBP2		CACNB4	ADAM23
ROR1		PHC3	C5orf47	PSD3	NUDT12	GPHN		ADAD2	TCP11L1	FCHO1		DYNC1LI1		ZC2HC1C	F11R		SLC25A44	ADAM23
PAPOLB		PRKCI	RAB3IP	SMS	PRDM16	GPHN		MOB1A	SACM1L	FCHO1		HEY2		ZC2HC1C	TXNDC16		UROS	ADAM23
HMGB3		GSE1	KIF27	SUMF2	CRYBG3	GPHN		RAD51AP1	SLC9A6	FCHO1		WBP4		ZC2HC1C	TRIQK		MKI67	FAM237A
CDH17		GSE1	TBX20	ABCD3	STK3	MPP5		HHEX	MYZAP	KCNN1		OTOGL		ZC2HC1C	BEND4		CRNKL1	FAM237A
C8orf44		GSE1	TACC1	GHDC	STOM	MPP5		SAMD12	FAM13C	IL12RB1		C17orf110		ZC2HC1C	FREM1		TADA2B	DYTN
VSIG1		EMC8	CDC73	MNT	C2orf68	TMEM229B		FAM21D	CEP152	IL12RB1		NCOA5		ZC2HC1C	KIAA1841		PHACTR1	MDH1B
IL13RA1		EMC8	PPP4R4	TMEM155	AJAP1	TMEM229B		SLC11A2	NIT1	MAST3		PIGN		ZC2HC1C	ANKFY1		NR2C2	MDH1B
NHS		IRF8	FLRT3	SCIMP	TIMM23	TMEM229B		ELOVL5	SHOX2	MPV17L2		FAM177A1		NEK9	SLC39A10		CLIP2	MDH1B
SRSF11		MTHFSD	TBCK	MYSM1	SEC23A	TMEM229B		RAVER2	COMMD6	PDE4C		MYOT		NEK9	CALML4		SLC35E2B	MDH1B
ARHGEF39		MTHFSD	STRN	SLC4A4	2020-09-10	TMEM229B		CNN2	C14orf37	IQCN		FBXO3		BATF	GCNT4		CTRL	MDH1B
TTC28		MTHFSD	UCHL5	PARD6B	BDH1	TMEM229B		PPP1CB	USH1G	IQCN		SLC22A23		FLVCR2	PHYHIPL		BCL2L11	MDH1B
TXLNG		MTHFSD	UEVLD	PDE7B	WASHC5	TMEM229B		C1orf31	SLC15A5	IQCN		2020-09-09		FLVCR2	N6AMT1		MAATS1	MDH1B
GTF2H5		MTHFSD	PEAK1	DPPA4	RPS6KA2	TMEM229B		LAMP3	YPEL1	IQCN		C9orf85		IFT43	AR		NLGN3	FASTKD2
DRG2		MTHFSD	PTPRD	DCLK3	SRGAP2	PLEKHH1		ZDHHC9	ATP6V0A2	IQCN		KCNH8		GPATCH2L	CD44		FOXP2	FASTKD2
FGF2		C16orf95	SACM1L	PHGDH	NIM1K	ARG2		NOL4	ABL1	IQCN		NCOA1		GPATCH2L	MAGEB10		PKD1	FASTKD2
PCDHGC3		C16orf95	CYP19A1	HTR4	HSPA4L	RDH11		LRRTM2	EIF4E	LSM4		PYURF		GPATCH2L	GXYLT1		RPRD1A	FASTKD2
LURAP1		FBXO31	FGF2	MRPS27	PROX1	RDH11		GATSL3	MPPED2	LSM4		SREBF1		GPATCH2L	DNAJC27		CTDP1	FASTKD2
PCDHGA8		FBXO31	CPLX2	ING3	POU4F2	ZFYVE26		FCRL3	ATF3	PGPEP1		APOBEC3A		GPATCH2L	SLC35G2		ANAPC7	FASTKD2
PCDHGA6		MAP1LC3B	CCDC171	TM7SF2	ATRAID	ZFYVE26		ZNF17	GATA6	PGPEP1		FAM84B		GPATCH2L	ZNF843		VGLL3	FASTKD2
PCDHGA2		ZCCHC14	GDI2	TFAP2C	PCDH15	ZFYVE26		PNO1	CEP57L1	PGPEP1		MTMR10		GPATCH2L	STK38L		SWAP70	FASTKD2
PCDHGB4		ZCCHC14	ZNF678	BUB1B	SAMD5	ZFP36L1		FZD8	FPGT	PGPEP1		PISD		GPATCH2L	EMC3		UBE2QL1	FASTKD2
GPX6		ZCCHC14	CLPB	ADAM12	WDR82	ACTN1		COL1A2	ACTR8	ELL		ADIPOR2		GPATCH2L	THAP1		FASN	FASTKD2
AC135178.1		JPH3	YIPF6	ACHE	MTSS1	ACTN1		CAP2	FLII	KXD1		NTM		ESRRB	RAB28		KIF1B	KLF7
TIGD1L2		JPH3	SRXN1	KCNC4	CUL4A	ACTN1		BARD1	TRPC3	KXD1		ZHX1		ESRRB	TAF9B		SOX5	KLF7
FBXO27		SLC7A5	DGKH	BCAS1	ISY1	ACTN1		MAPK13	UBXN8	KXD1		SLFN5		LRRC74A	ARPC3		TM2D2	KLF7
NANOG		ZFPM1	AFF2	PTPN9	TBL1X	ACTN1		ENDOG	KL	KXD1		ZNF506		CIPC	NEDD9		DKK3	KLF7
CYP4F2		SNAI3	FAM49B	SPOPL	ATP6V0A2	ACTN1		SF3B4	NUP98	UBA52		DMC1		TMEM63C	MUM1L1		ACKR3	KLF7
HMGCL		PIEZO1	GNAI1	PABPC1L2A	KLHL21	DCAF5		DCLRE1B	CCDC62	UBA52		MMGT1		POMT2	TNFRSF12A		IL17RD	KLF7
KCTD7		GALNS	PRR11	LINGO4	SUMO1	DCAF5		RRP8	ARHGEF26	UBA52		PECR		GSTZ1	OLFM3		FOXK1	KLF7
SPOCK2		GALNS	SLC7A14	RALGPS2	FBXL17	DCAF5		LRRFIP2	CD96	KLHL26		KDM4C		GSTZ1	TYR		NUPL2	KLF7
MTDH		TRAPPC2L	POTEG	MPDU1	SESN3	DCAF5		LY6K	EIF1AX	KLHL26		CEP41		ADCK1	C8orf22		AP3S2	KLF7
DSTN		TRAPPC2L	POTEM	AMZ1	ATG12	DCAF5		RNASE4	SMPX	CRTC1		ADCY9		ADCK1	TEAD1		PID1	KLF7
SSX2B		TRAPPC2L	SNX29	POC1B-GALNT4	EPB41L4B	DCAF5		RNASE4	STXBP6	CRTC1		CAMKK2		NRXN3	GPAM		CASK	KLF7
ECHDC1		TRAPPC2L	NT5C2	NR1D1	NOVA1	DCAF5		PROM1	ZBTB24	CERS1		LIN54		NRXN3	ZNF605		UBE2Q2	KLF7
TMEM125		CBFA2T3	IYD	TMEM95	TMBIM6	DCAF5		NGRN	SHE	CERS1		QDPR		NRXN3	FGF2		WWC1	CREB1
ARHGEF38		CBFA2T3	KIF11	MOB3A	ALG13	EXD2		NUDT13	SRRM4	COPE		NUP35		NRXN3	NEBL		DAZAP2	CREB1
RASEF		CBFA2T3	VCPIP1	MTSS1L	ATMIN	EXD2		S1PR1	ODF2L	COPE		FAM150A		NRXN3	ZNF275		POLR2A	METTL21A
RNF219		ACSF3	SLC35E3	SLMO2	DCUN1D1	CCDC177		PACSIN2	ST6GALNAC3	COPE		MRPL35		NRXN3	FAM199X		ARHGAP29	METTL21A
TNNI1		ACSF3	CLIC6	MAMDC2	JADE2	SUSD6		GRB10	THRA	COPE		MGAT5B		NRXN3	MAML3		CPNE3	METTL21A
ODZ4		ACSF3	RNASEH2B	DEFB134	MOB1B	SRSF5		SCN5A	MYO5A	SUGP2		TMEM215		NRXN3	PHIP		GRIN2A	METTL21A
METTL12		ACSF3	ANKEF1	PCGF5	PCDHAC1	SMOC1		PVRL4	VPS13C	SUGP2		GPD1L		NRXN3	CLHC1		ATXN7L1	CCNYL1
ITCH		ZNF778	C6	C7orf53	IPO8	SMOC1		PPP2R3A	USP43	SUGP2		ERCC6L2		DIO2	MFAP3		ZNF589	CCNYL1
HMCN1		ZNF778	NEU3	SMG1	PRMT1	SMOC1		SPATS2	ARHGEF12	SUGP2		YIPF4		DIO2	RBM28		ACOX3	CCNYL1
TRNAU1AP		ANKRD11	C5orf51	ARHGAP10	MYOZ2	SMOC1		UQCRC2	TRMT5	MEF2B		NPTN		DIO2	AGTPBP1		TFAM	CCNYL1
SSX2IP		ANKRD11	DGCR8	DUSP26	B2M	SLC8A3		SLC25A14	CSNK1A1L	NCAN		SHISA2		DIO2	NUP43		HOXB3	CCNYL1
CDCA5		ANKRD11	LANCL3	HECTD1	NEUROG2	ADAM20		C10orf108	SWT1	TM6SF2		RNF128		CEP128	MAN2A1		EGR4	CCNYL1
AC015804.1		ANKRD11	SHE	PCDHA11	COMMD10	MED6		CNTNAP3	RAP2A	SUGP1		ASPHD1		TSHR	SLC4A4		ZNF839	FZD5
FAS		SPG7	CDC27	MED7	CHRNB2	MED6		FICD	CHRNA6	CILP2		FAM122B		TSHR	ZNF609		WDR35	FZD5
TMOD1		SPG7	STMN2	RBM43	USP10	MED6		CLEC7A	ENTPD5	LPAR2		RP11-298P3.4		TSHR	MPP6		LHX5	PLEKHM3
SGIP1		RPL13	TPP2	MRPL42	FOXN3	MED6		SMARCD1	ARHGEF10	LPAR2		TBC1D3G		TSHR	PAQR3		IER3	PLEKHM3
FAM198A		RPL13	ZKSCAN8	UTP23	MICAL2	MED6		RBM41	PKHD1L1	LPAR2		INTU		STON2	PCNX		REXO1	PLEKHM3
NEK7		RPL13	LGR6	TMEM196	LNPK	MED6		ENY2	C1orf109	LPAR2		CBWD2		STON2	TXNRD1		RTL8B	PLEKHM3
SMARCA5		DPEP1	FAM127C	INHBC	SRSF8	MED6		UBE3C	NPY1R	ZNF486		DCBLD2		SEL1L	TMEM30A		TAC4	PLEKHM3
SH2D4B		VPS9D1	TAOK1	CHMP1B	SLC13A1	MED6		GGA1	TP73	ZNF626		SCN4B		SEL1L	CEP41		NUDT16L1	CRYGC
TMEM131		VPS9D1	NBEAL1	DPYSL5	PKIA	TTC9		RPS6KA4	RBM47	ZNF708		MYO5A		FLRT2	FBXO8		VNN3	CRYGB
IRS1		ZNF276	PANX1	FOXA1	ZC3HAV1L	MAP3K9		RAE1	BCL2L11	ZNF43		CLLU1		FLRT2	ATAD2B		SLC25A13	CRYGB
NANOGP1		ZNF276	MSX2	JAM2	CDK8	MAP3K9		LNX2	TMEM100	ZNF43		C11orf71		FLRT2	NXN		CYP4A22	CRYGA
ZNF493		FANCA	NAA38	LAMP3	MEF2A	MAP3K9		CD58	ADIPOQ	ZNF43		MAP2K1		FLRT2	OTUD3		PGRMC2	IDH1
RPS20		FANCA	GPM6B	CABLES1	FOXD1	MAP3K9		PRR15L	DCUN1D5	ZNF43		SPHKAP		GALC	SS18L1		MBD1	IDH1
SLC6A7		FANCA	ST3GAL6	KRTAP20-4	PPP1R9B	MAP3K9		PCDHB14	RFC3	ZNF43		PSMD10		GALC	SMCHD1		MPZL1	PIKFYVE
GPANK1		FANCA	IGF2R	AC093726.4	TYW1	MAP3K9		HOXA13	INTS2	ZNF208		ISCU		GALC	RBM11		NOL9	PIKFYVE
CLIC5		SPIRE2	SGIP1	NPLOC4	GRID2	MAP3K9		IER3IP1	KDM4A	ZNF724		PDE4D		GALC	SOCS5		NOLC1	PIKFYVE
ZNF12		TCF25	FAM184B	C7orf49	NEURL1B	MAP3K9		ZNF365	TMX4	ZNF254		ADNP		GALC	SOSTDC1		LEMD2	PIKFYVE
ST8SIA3		OR2T33	KCNN3	KLHL2	ZNHIT6	MAP3K9		MAP3K1	TRAT1	ZNF254		PIP5K1B		GALC	HGF		GAS1	PIKFYVE
UBE2O		OR2T12	MPEG1	HRH4	DKC1	MAP3K9		MOCS1	SLC26A4	ZNF254		C19orf52		ZC3H14	NOP14		GDAP2	PIKFYVE
PHKA1		OR2G6	SLCO4C1	LUZP2	ELL2	PCNX1		DLL1	MBIP	ZNF254		FBXL17		ZC3H14	KRT35		MED29	PIKFYVE
TRPC6		OR14I1	SLC25A37	STX3	KBTBD6	PCNX1		OSGEPL1	TMEM55B	POP4		HSPA12A		ZC3H14	CD2AP		EPS15	PIKFYVE
RWDD2B		SH3BP5L	PIGM	PLN	C15orf41	PCNX1		LIPI	PDE4B	CCNE1		ANKIB1		ZC3H14	IL1RL2		MPV17L	PTH2R
SLC41A2		ZNF672	TRIM45	FAM83D	HDAC9	PCNX1		DEFB118	SLC9A3R1	CCNE1		KDM6A		ZC3H14	UBE2R2		COL4A3BP	PTH2R
TMEM185A		ZNF692	COL4A3BP	SLC16A6	ALG9	SIPA1L1		FGF5	SERPINH1	CCNE1		VAMP4		ZC3H14	VCPKMT		ZBTB10	PTH2R
CALHM1		ZNF692	GPR75	MTRNR2L10	2020-09-08	SIPA1L1		CSGALNACT2	ETNK1	CCNE1		ABCA8		ZC3H14	C12orf79		CYB561D1	MAP2
OSBPL3		PGBD2	TEX9	WNT10B	SMOX	SIPA1L1		NARS2	GIN1	CCNE1		OAT		ZC3H14	ZCCHC24		CBX6	MAP2
SLITRK3		PGBD2	PSEN1	FNBP1L	CCDC137	SIPA1L1		SMOC2	CALD1	URI1		C6orf211		ZC3H14	AGPAT3		CHRNB2	MAP2
SNRNP40		LOC102724250	UBN2	RFESD	NRK	RGS6		ATP6V1A	LIMS1	TSHZ3		SLTM		ZC3H14	ATP7A		RERE	MAP2
TRIM41		LOC102724250	MGAT5	ZCCHC14	NRXN3	RGS6		MOCS2	USP12	TSHZ3		NINL		ZC3H14	TNFRSF19		TRIM71	MAP2
AC005609.1		FAM110C	ZBTB14	SLC4A7	RFT1	RGS6		ALKBH1	CPD	DPY19L3		IRS2		ZC3H14	SMARCA5		ARFRP1	MAP2
ATG4A		SH3YL1	FOXO1	BCO2	RABGEF1	RGS6		ANKRD45	ATF7IP	DPY19L3		SCRN3		ZC3H14	DNAJC24		ZNF182	MAP2
CRMP1		SH3YL1	SOX6	C9orf64	SGMS2	RGS6		ZFC3H1	GTF3C4	DPY19L3		FAM175B		ZC3H14	USP13		RCAN1	MAP2
ZNF354B		SH3YL1	POGK	HOPX	MS4A7	RGS6		MYT1L	IQGAP1	DPY19L3		EPSTI1		ZC3H14	SLC25A51		ELOF1	MAP2
RNF207		SH3YL1	ZNF583	CPS1	SSFA2	RGS6		KCNC2	CEP97	ANKRD27		FAM92A1		TDP1	TSN		IGFBP5	UNC80
SHISA6		ACP1	POLR3D	SCP2	RNF125	DPF3		FXC1	DBT	ANKRD27		CAV1		TDP1	SEC62		FZD5	UNC80
FAM156B		TPO	NEDD4	C12orf54	ZBTB21	DPF3		UMODL1	ARHGAP5	NUDT19		RPS23		TDP1	PGR		GIN1	UNC80
BTBD11		TPO	DMRT2	GRID2	KPNA1	DPF3		TPRG1	CREB1	SLC7A9		SUMO3		KCNK13	ZNF596		HOXB9	UNC80
PCDH10		TPO	DUOXA1	ZHX2	PRSS16	DPF3		MECOM	NCMAP	RHPN2		TCEAL8		RPS6KA5	PWP1		IRF4	UNC80
SYT17		TPO	FKBP15	MRPL50	PDE4DIP	DPF3		IFIT2	AKAP11	GPATCH1		EHMT1		RPS6KA5	HS2ST1		AP2M1	UNC80
THSD7B		TPO	SLC5A1	ELAVL2	TCF7L2	DPF3		MXD4	TSC1	GPATCH1		DDC		DGLUCY	TOX3		CRLF3	UNC80
BMP6		TPO	GTF3C4	MTRNR2L7	GJC1	RBM25		EPDR1	TMTC3	CEBPA		CORO2A		DGLUCY	OSBPL3		NFE2L1	UNC80
TWSG1		TPO	MORC4	SHC4	SLC16A10	PSEN1		LIMCH1	SLC26A2	CEBPG		PARP3		DGLUCY	URI1		IGFBP1	RPE
NECAP2		TPO	ZBTB6	ATG12	DHX15	PSEN1		CYP4F3	STK10	CHST8		KRBA1		DGLUCY	EGFR		GDI2	RPE
KIAA0494		TPO	NDUFAF6	ADH1B	CBLB	PAPLN		TAF13	CRYZ	LSM14A		ALDH9A1		DGLUCY	GPR85		NUDT21	RPE
ATXN7L3B		TPO	YY1	TMEM54	LHFP	HEATR4		ARL17A	C18orf63	LSM14A		ARMCX3		DGLUCY	ZNF576		KCNJ12	RPE
ZNF107		PXDN	RAB21	RLIM	DCLK1	HEATR4		DLX4	TGFBR3	LSM14A		PCDHB10		DGLUCY	JHDM1D		FBXW11	RPE
CDK12		MYT1L	OPA1	KAT7	TULP4	ACOT2		CYTH1	ING5	LSM14A		CPVL		DGLUCY	AP4S1		FKBP1A	RPE
MLXIP		MYT1L	ATP6V1B2	FERMT2	USP38	ACOT6		DMXL2	KCTD6	KIAA0355		ESYT3		DGLUCY	NRG1		CLEC2L	RPE
KIT		MYT1L	C8orf44-SGK3	PPP2R3A	C1S	DNAL1		C4orf45	C22orf39	KIAA0355		Z99715.1		GPR68	HLA-G		STARD8	RPE
SPRR2E		MYT1L	CAMSAP2	HLA-C	XPO5	DNAL1		ADH1B	ATP7A	GPI		STXBP4		GPR68	DROSHA		ADGRG6	RPE
EGLN1		MYT1L	MUC17	ANAPC15	SCD	ELMSAN1		CDH9	RBAK	GPI		DLGAP2		CCDC88C	AICDA		RABL6	RPE
TTC4		MYT1L	UMODL1	TPRG1L	TPP2	ELMSAN1		CLEC4E	MEGF10	ZNF792		SBSPON		TC2N	POU6F1		UBFD1	RPE
RAB40B		MYT1L	NEDD9	SLC12A7	CDON	ELMSAN1		LRRC17	ALCAM	SCN1B		DSCR3		TC2N	EHHADH		CHSY1	KANSL1L
PEX19		MYT1L	MFAP1	DNM3	DGKH	PTGR2		SLMO2	CLCF1	SCN1B		SNX15		TC2N	CBWD6		PLXND1	KANSL1L
OR7D2		MYT1L	RPS6	TSPAN3	TNKS	ENTPD5		MYSM1	ANKRD27	FAM187B		LTB4R		TC2N	PRCC		PIK3CG	KANSL1L
ZNF551		MYT1L	GATAD1	CARHSP1	ATAD3C	ENTPD5		POU3F4	TMEM57	USF2		HACE1		TC2N	IGF2BP1		LHPP	KANSL1L
RASGRP3		MYT1L	TBC1D15	FEZ2	CHUK	ALDH6A1		NUDT11	RASGEF1B	DMKN		SESTD1		TC2N	C6		ZNF41	KANSL1L
PLEK		EIPR1	SRRD	OTC	PML	ALDH6A1		CCL18	ANKRD13C	DMKN		ATP12A		TC2N	CD2		SKIDA1	KANSL1L
ECT2L		EIPR1	CLCN5	AL079342.1	PHKA1	VSX2		PTTG1IP	NAV1	DMKN		DSC2		TC2N	CDH9		CCDC51	ACADL
SQRDL		EIPR1	LIN7A	KRTAP10-4	ANTXR2	VRTN		NHP2L1	FRMD8	DMKN		PION		TC2N	CBWD5		ADGRG1	LANCL1
C10orf118		EIPR1	LINC00346	EML6	LMBR1L	SYNDIG1L		MTRF1L	SKA3	DMKN		DDAH1		TC2N	SUMO3		SRF	LANCL1
KCNK5		ADI1	MRRF	DNAJB9	ESRP1	LTBP2		EAF1	GABARAPL1	DMKN		METTL10		TC2N	ZNF410		ELOVL2	LANCL1
HIF1A		ADI1	MAP4K3	RGPD6	AHCYL2	AREL1		NOVA2	COL9A2	DMKN		C1D		TC2N	GPD2		CARD14	LANCL1
ABCE1		ADI1	RFX7	KIAA1257	LUC7L3	AREL1		RUFY2	DDX53	SBSN		CELF2		TRIP11	LTN1		LIN54	LANCL1
VAV2		ADI1	PKHD1	AF127577.1	MON2	AREL1		FREM1	SCO1	KMT2B		MRPL17		TRIP11	ADO		MBOAT2	LANCL1
CNGA1		RNASEH1	RSU1	HMGN4	MMP15	AREL1		LRP2BP	PIGX	U2AF1L4		RS1		CPSF2	PIGZ		FBXL18	LANCL1
ITGB3		ALLC	NUCKS1	EEA1	ARHGEF5	YLPM1		RP3-486B10.1	NUDT21	U2AF1L4		CCDC170		LGMN	ZCCHC14		KLHDC3	LANCL1
EGR3		SOX11	MED7	HES1	THAP1	YLPM1		MCM6	C1orf131	PRODH2		NT5C3		LGMN	RBMXL1		SCP2	LANCL1
IL28RA		CMPK2	LTN1	KLK10	SELENOI	YLPM1		FDFT1	UFM1	HCST		MYBL1		LGMN	PAX9		DLD	CPS1
P4HB		CMPK2	ELOVL6	DLG2	DNAJC24	YLPM1		CCDC91	MSR1	HCST		POGK		LGMN	POLR1B		NSL1	CPS1
SLC16A9		RSAD2	FAM210A	GOLGA8B	DKK3	PROX2		AL603965.1	CD160	HCST		PPP2R5E		LGMN	TTBK2		BACH2	CPS1
AFAP1L1		KIDINS220	SMIM8	EPDR1	UBL3	PROX2		IFNA2	TAPT1	HCST		BCL2L13		NWD1	PSME3		GNPDA2	CPS1
SUCO		KIDINS220	BAG4	ZNF154	SHOX2	EIF2B2		LMAN2	PSMF1	TYROBP		C7orf63		NWD1	CHTOP		ZNF672	CPS1
TTC40		KIDINS220	ZNF283	RYR3	PABPN1	MLH3		XKR9	HERC3	TYROBP		DBI		NWD1	ENGASE		CCDC30	CPS1
CDH18		KIDINS220	METTL20	C12orf65	NIPBL	MLH3		C7orf13	C19orf12	TYROBP		SLC1A3		SIN3B	KCTD6		CHM	ERBB4
RANBP2		KIDINS220	GTPBP10	HRK	HPS5	MLH3		LIPF	SPDYA	TYROBP		C7orf41		SIN3B	ABHD2		SP1	ERBB4
GOLT1B		KIDINS220	HNF4A	TMEM57	IGF2R	MLH3		ROPN1	PLS1	LRFN3		TBX3		SIN3B	SEPSECS		ZNF254	IKZF2
DNAJB6		KIDINS220	DARS	TXNDC15	USP3	MLH3		FGFR1OP	DNAJC25	LRFN3		SPTBN1		SIN3B	GMFB		ZNF213	IKZF2
ANKRD49		KIDINS220	MTDH	ACTR8	HOXB1	ZC2HC1C		KCNJ16	ASB13	SYNE4		UBE2V2		SIN3B	ZBTB44		FLOT2	IKZF2
FAM176A		KIDINS220	SCN11A	TTYH3	ST3GAL6	ZC2HC1C		TXNDC15	LHFPL3	SYNE4		ALCAM		CPAMD8	SNRNP200		EIF1AX	IKZF2
KLHL15		KIDINS220	NUAK1	RFFL	CABLES1	ZC2HC1C		CYTH3	PRKG1	CAPNS1		NSRP1		CPAMD8	MAP7		SEMA4F	IKZF2
GCSAM		MBOAT2	SLC25A42	EPN2	ABCB5	ZC2HC1C		MTMR6	CCNL2	CAPNS1		RAB27A		BABAM1	WDR36		SDC4	IKZF2
YWHAB		ASAP2	HOXD9	ITGA9	ATP6V0D1	ZC2HC1C		CASP12	ACADSB	ZFP82		FDCSP		BABAM1	DDC		SBF1	IKZF2
CLRN3		ASAP2	FBXW7	KIAA2022	PKHD1	ZC2HC1C		CHURC1	DHX9	ZNF566		GPC5		BABAM1	SH2D1B		GPCPD1	IKZF2
IPO7		ASAP2	CNTNAP2	ZXDB	ZNF862	NEK9		FAM83D	CDK14	CHD7		GPM6A		BABAM1	DAO		NPHP4	IKZF2
STAT2		GRHL1	RYR2	C3orf32	LMO3	NEK9		MESP1	NIP7	CHD7		SMARCAD1		DDA1	FSD2		HES5	IKZF2
RAB11A		GRHL1	DDX19A	CKAP2L	FCHSD2	NEK9		MCIN	ABHD3	CHD7		STAT1		FAM129C	SLC35G3		TUBGCP3	IKZF2
BAG1		KLF11	PPM1L	RBM47	TARSL2	TMED10		KDSR	VAMP3	SSBP2		THUMPD1		FAM129C	C14orf39		SLC2A13	IKZF2
DGCR14		KLF11	MTRR	FAM21D	DDHD1	FLVCR2		POU5F2	ST3GAL5	SSBP2		CLK4		FAM129C	AC021218.2		MRPS27	SPAG16
ARSJ		KLF11	ZNF35	PEX26	TET2	FLVCR2		PSPH	CENPQ	SSBP2		SERPINB10		FAM129C	FAM58A		PCDHA13	VWC2L
POU3F2		KLF11	FAF2	FOXG1	CLASP2	FLVCR2		ARL3	BLZF1	SSBP2		FRS2		FAM129C	THOC2		SIGMAR1	VWC2L
ACSL4		HPCAL1	BROX	FKBP5	LIPG	TTLL5		KRT12	TGFBR1	SSBP2		CNPY2		FAM129C	ENOX2		ZHX3	VWC2L
STK38		HPCAL1	PRLR	DHRS12	CRIM1	TGFB3		SPATA22	RAB14	ALDH3B2		ADO		FAM129C	DCLK1		UBE4B	VWC2L
PDS5B		HPCAL1	RASSF6	MIDN	AP3M1	IFT43		CSTA	ZNF831	DEF8		TEDDM1		FAM129C	ZBTB5		MYB	BARD1
SNRNP25		HPCAL1	RRP15	ZEB1	GAS1	GPATCH2L		RNF39	FAM83D	RUNX1		GPR64		UNC13A	ZC3H12C		KCTD10	BARD1
SAP30L		NOL10	LACE1	RAET1L	PAPD5	GPATCH2L		SDC2	RAB1A	SETD4		CTCFL		UNC13A	DDX19A		SLC35E2	BARD1
RANBP9		NOL10	ITGAL	TPP1	KLHL5	GPATCH2L		CNBD1	EGR1	SETD4		ZBTB43		UNC13A	SMURF2		ADPRHL1	BARD1
MYEOV		NOL10	METTL2B	TPH1	SEC22B	GPATCH2L		TACR3	GART	SETD4		TTC5		UNC13A	KIAA0232		CDC42EP4	BARD1
PRKAR2B		PDIA6	ZNF101	KRT85	AFF2	GPATCH2L		TLN2	RPS23	SETD4		TMX4		FCHO1	SNX30		XPR1	ABCA12
RP11-73O6.4		PDIA6	DYNLL2	OR2B11	MCTP1	GPATCH2L		PARD6B	KLHL24	SETD4		EIF2C1		FCHO1	FNTB		KIF3B	ABCA12
ZNF202		ROCK2	C5orf42	KRTAP4-5	ACVR1B	ESRRB		GPR84	KIF24	HECW2		ZNF576		FCHO1	METTL15		SIX1	ABCA12
COL24A1		ROCK2	MAP7	ITGB6	ZFP36L2	ESRRB		C2orf49	PCM1	HECW2		TXNDC16		FCHO1	PRKAB2		CD2AP	ATIC
MRPS18C		E2F6	EBF2	MAB21L1	PRDM2	ESRRB		SHROOM1	CHMP2B	GTF3C3		TFRC		B3GNT3	DCUN1D4		RASL11B	ATIC
RP11-766F14.2		E2F6	RTN4IP1	SMCR7L	LAPTM4A	VASH1		FGFR1OP2	CTAGE5	C2orf66		DCP2		MAST3	FBXL17		AIDA	ATIC
CACNG8		E2F6	LMAN1	SLC7A1	TLE3	VASH1		TMEM45A	IFNGR2	SPAG9		DKK1		PIK3R2	ZNF260		PHF2	ATIC
TSHZ3		E2F6	KCTD16	DDX5	BNC1	VASH1		MRPL42	TIA1	NME1-NME2		GIPC2		SSBP4	HECW1		CREB3L2	FN1
PCDH11Y		E2F6	QSER1	OC90	XRN1	ANGEL1		ZSCAN4	ST8SIA3	NME2		ASAH2		SSBP4	EXOSC2		BCL9L	FN1
ACVR2A		E2F6	HSD17B12	LIN28A	ZNF618	ZDHHC22		ADRA2C	CA13	NME2		CSF2RB		UBA52	CDV3		VPS13A	FN1
SH3KBP1		E2F6	ZNF330	ZFC3H1	NLRX1	ZDHHC22		TGIF1	DGAT2	NME2		MSTN		CERS1	ANK2		CAMKK2	FN1
SERF1A		E2F6	ZNF251	SEMA4B	SLC35A3	TMEM63C		MEGF10	CXorf57	UTP18		ELF2		GDF1	GPR180		TBC1D9B	FN1
PPIF		GREB1	KIAA1143	SLC25A48	CDK12	GSTZ1		AC131180.1	FGF2	COX11		PCDHB4		BORCS8-MEF2B	XPO1		NEDD9	FN1
TMEM189-UBE2V1		GREB1	PHIP	MAP4K5	2020-03-05	GSTZ1		NUP107	CCDC173	COX11		MBTPS2		BORCS8	NHLRC2		PYROXD1	FN1
TMEM189		GREB1	PEG3	RDH10	TMSB10	GSTZ1		ROR2	DDX6	STXBP4		CASC4		GATAD2A	CDYL2		NFATC2IP	FN1
SOS2		LPIN1	ZNF418	SESN3	GOSR1	GSTZ1		GATA6	AFF2	STXBP4		CLEC1A		GATAD2A	SDK1		SLC22A10	FN1
WDR36		LPIN1	OPRK1	SRPK1	MMP19	TMED8		FERMT2	MRE11	HLF		LPHN2		YJEFN3	TMEM33		ACVR1C	FN1
GBP2		NBAS	ANKRD12	ARHGAP8	CD99L2	TMED8		SEMA4C	RIPK4	HLF		RECK		YJEFN3	ATXN3		EEF2	FN1
SLC25A3		NBAS	PAWR	PTPN1	CISD2	NOXRED1		UACA	SESN3	HLF		LRIF1		CILP2	CCDC180		CBX1	FN1
ZC3H14		NBAS	GPT2	DNER	EMC1	NOXRED1		FGD1	CHST9	NOG		ZNF782		LPAR2	ERO1LB		CLTC	FN1
IRF8		NBAS	IER3IP1	FBXL18	CDKN2AIP	VIPAS39		MAB21L3	ETV1	TRIM25		NET1		LPAR2	ANO5		ISY1	FN1
DUSP5		FAM49A	ZMYND11	DERA	ILF3	VIPAS39		ACTR8	CCDC125	COIL		TBCK		ZNF101	RPIA		C8orf82	FN1
TAOK3		VSNL1	AGO2	OSBP2	ATP7A	VIPAS39		ISCA1	RNF139	SCPEP1		NSL1		ZNF682	NEGR1		MSRB3	FN1
GALNT11		SMC6	ZNF792	KRTAP22-2	FAM214A	VIPAS39		TJAP1	LRRFIP1	AKAP1		SLC5A12		ZNF682	GDAP2		LHFPL2	FN1
APAF1		GEN1	OLFM3	RICTOR	FAM160B1	ISM2		SNRNP27	CRLF3	AKAP1		IKBIP		ZNF714	TULP4		IFT122	FN1
ZNF583		GEN1	SORT1	RIC3	AKT3	ISM2		PLXNA4	CNIH4	AKAP1		NANOS1		ZNF431	KIF5B		RBL2	FN1
RP11-480I12.4		MSGN1	SUGT1	SOCS6	ETF1	ISM2		PTPN2	OTOGL	AKAP1		KLHDC5		ZNF738	PDE10A		LAMB1	FN1
DLC1		NT5C1B-RDH14	PPIP5K2	FRMD3	NKX3-2	ISM2		XKR6	CKLF	AKAP1		WASF3		ZNF43	LIN52		HIVEP3	FN1
ERLEC1		NT5C1B-RDH14	TTC39B	FAM74A1	PAXIP1	NRXN3		ZNF507	WDYHV1	AKAP1		TIGIT		ZNF43	VPS37A		LRCH4	FN1
BPTF		RDH14	DR1	OR56B4	MRGPRX3	NRXN3		EFHC2	CPPED1	AKAP1		BRMS1L		ZNF43	MSL3		ADGRL2	FN1
GPRC5A		OSR1	TADA2B	DLG5	STYX	NRXN3		SORCS3	MATN3	AKAP1		NPY2R		ZNF43	RALB		HPCAL1	FN1
LAMC1		TTC32	ADH4	RCOR1	RC3H1	NRXN3		BMI1	RFTN2	AKAP1		ZNF367		ZNF43	SYT5		SNRK	FN1
MED21		WDR35	SNX30	ZNF337	JTB	NRXN3		SMURF2	DPP8	AKAP1		C10orf40		ZNF726	TPH2		KPNA2	FN1
KL		WDR35	SCYL2	GMNC	FSTL1	NRXN3		CKAP2L	UBE2N	MSI2		FAM216B		ZNF254	RP11-362K2.2		DDOST	FN1
AP1AR		WDR35	TAF1	C6orf141	GNS	NRXN3		PENK	GOLT1B	MSI2		BEND4		ZNF254	SMIM11		SLC2A1	FN1
GPR88		WDR35	IMPG2	PLEKHG4B	SYNPO2L	NRXN3		GALNT3	NOL12	VEZF1		ABHD15		ZNF254	APOBEC4		DNAJC11	FN1
PUM2		WDR35	NUDT19	OTUD7B	LYRM9	NRXN3		VPS53	JADE1	VEZF1		PCDHAC1		ZNF254	C5orf51		PPFIA1	FN1
SRP68		WDR35	GJB4	TCEAL7	ROGDI	NRXN3		IL17A	BDKRB2	VEZF1		PCDHA10		ZNF536	CBWD1		ALCAM	FN1
CDK14		WDR35	BTBD11	CABP7	UBE2G1	NRXN3		FOXG1	SLC19A3	SRSF1		CDS1		TSHZ3	GDF10		KL	FN1
GPR39		SDC1	C3orf72	CLMP	SOS1	NRXN3		KCNB1	ZNF267	SRSF1		TOMM20		GPATCH1	FBXL8		LIPE	FN1
PRR11		SDC1	TMEM50B	ANKRD55	RAB33B	NRXN3		EPM2AIP1	EIF4E2	EPX		LGI2		PEPD	ECHDC1		PFN2	FN1
BBOX1		PUM2	REPS2	FGFR1OP	TMEM56	DIO2		BAZ2B	NEMP1	MKS1		SAMD8		KIAA0355	SMIM8		CSMD2	FN1
COPS2		PUM2	CHURC1	STMN4	PNRC2	DIO2		ATL3	GDNF	MKS1		SEMA3A		GPI	C4orf46		ANKRD28	FN1
MPZ		PUM2	ZNF652	DLL1	NMNAT1	TSHR		CTAGE1	GRID2	MPO		SIAE		GPI	ARHGAP12		SZT2	FN1
RGS13		PUM2	INTS7	XKR9	C1orf21	TSHR		CLTC	IKBIP	TSPOAP1		ACSS3		ZNF599	FBXO30		ITPRIP	FN1
RYR2		PUM2	LHX9	ZNF236	RORC	TSHR		IGF2	TPD52	TSPOAP1		LTN1		ZNF30	BIVM		SDR39U1	FN1
UBA6		GDF7	CYP20A1	NOVA2	ADARB1	TSHR		FAM200B	RMND5A	MTMR4		SLC1A1		ZNF30	SLMAP		ACBD3	PECR
CCM2		LDAH	NHLRC2	ZNF673	PCLO	GTF2A1		LAMA1	MAP3K8	2020-09-04		ITGAV		ZNF30	MYL12B		SIRPA	TMEM169
RAP2C		LDAH	ZNF33B	PCYT1B	KDM5B	GTF2A1		MEX3C	PGM2L1	2020-09-04		TMEM144		ZNF792	FAM120C		SUB1	TMEM169
KIAA1199		LDAH	FAT3	AC105052.1	ZC3H14	STON2		RFTN2	CDX4	2020-09-04		APPL1		GRAMD1A	PTCHD1		AKT2	TMEM169
CASQ2		LDAH	NTN1	ITGB4	PTGS1	STON2		SDK1	AK9	2020-09-04		RXFP1		CD22	GOLGA7		GMFB	TMEM169
GNAL		LDAH	PPP1R9A	SOX5	CACUL1	SEL1L		BCO2	NIPA1	2020-09-04		LIN9		CD22	AHSA2		SYNPO	TMEM169
LARS		LDAH	HIPK2	SIK1	SPAG1	SEL1L		ARHGEF17	SNRPB2	2020-09-04		KRR1		CD22	CHURC1-FNTB		FANCA	XRCC5
LEPREL4		LDAH	USP6	SLC22A5	RAD23B	SEL1L		RICTOR	ARHGEF1	2020-09-04		CAPZA2		CD22	LATS2		TMEM161B	XRCC5
B2M		LDAH	FOXJ2	MMP15	UGCG	FLRT2		BDKRB2	RBMXL2	TRIM37		SEMA3E		KRTDAP	DOCK5		ASAP1	2020-03-04
CETN3		LDAH	KCNB1	RHOXF1	STK17A	FLRT2		DNAJB9	CAMK2D	TRIM37		SYT10		KRTDAP	PTEN		FSTL1	2020-03-04
TMEM38A		LDAH	KCNA7	PRKAA2	BARHL2	GALC		PTS	PIK3CB	TRIM37		ATG4C		DMKN	PHACTR2		SCARA5	SMARCAL1
RBM25		LDAH	ZNF37A	PPP1CB	ARHGEF7	GALC		ACHE	LSM14A	TRIM37		DIAPH2		DMKN	FEM1C		MRPS25	SMARCAL1
CCDC126		LDAH	IFI44L	RUNDC1	B4GALT2	GALC		FADS1	M6PR	TRIM37		GPR180		DMKN	ARMCX1		PAG1	SMARCAL1
POGLUT1		LDAH	CASR	LAPTM4A	DDX18	GALC		ELAC1	C2orf68	PRR11		HDAC2		DMKN	LILRB1		ICA1L	SMARCAL1
AP3D1		LDAH	SLFN13	SLC46A1	LYPD6B	GALC		PEAK1	MTMR1	CLTC		TNKS		DMKN	FAM98A		SMCR8	RPL37A
CNIH3		LDAH	ZNF736	AC132186.1	CLMP	GALC		FOXF2	IQCJ-SCHIP1	CLTC		TECRL		DMKN	S1PR5		TMEM259	IGFBP2
PRC1		LDAH	GRIN3A	KCNN2	SRPRB	GALC		FAM219A	ZRANB2	VMP1		PDIK1L		DMKN	PA2G4		DUSP6	IGFBP2
C4orf29		APOB	TENM1	PDLIM2	CCDC93	GALC		CYBB	NRK	RPS6KB1		MSANTD4		HAUS5	NUPL1		GALNT4	IGFBP5
PLS1		TDRD15	PLCB4	FBXO33	MAT2A	GPR65		AC133485.1	STK17A	RPS6KB1		ZNF207		RBM42	PSG4		PCDHB13	IGFBP5
AK5		TDRD15	HOOK1	SLC30A4	PTCD3	KCNK10		ARHGEF3	ZFC3H1	RPS6KB1		MKLN1		RBM42	TRMT12		ZMYM2	TNP1
ZRANB2		TDRD15	GSE1	KLF17	HNRNPU	KCNK10		PARK2	TSSK1B	RPS6KB1		MAP9		UPK1A	AMBN		CTPS1	TNS1
GEM		KLHL29	ZNF24	RALA	CGGBP1	KCNK10		MATN3	SUB1	RPS6KB1		STEAP2		UPK1A	LMCD1		BTN2A2	TNS1
TRIM4		ATAD2B	ANKRD33B	MIOS	HMGB3	SPATA7		CHMP1B	FAM13B	RPS6KB1		PEX5L		PSENEN	CCDC132		LRRC15	TNS1
ESYT2		ITSN2	HEMK1	SAMD12	RBSN	SPATA7		HEG1	EIF4B	RPS6KB1		EXOC8		PSENEN	ETNK1		CAPNS1	TNS1
AC104472.1		ITSN2	PRMT3	RAB10	MED29	EML5		RNF19A	FAM133A	RPS6KB1		UGT3A1		PROSER3	RORA		SENP1	TNS1
SLCO1C1		ITSN2	PTRH2	ZDHHC9	KCNH8	EML5		MTSS1L	C3orf58	HEATR6		HDX		ARHGAP33	ZFHX3		WDR43	TNS1
BID		NCOA1	KLK13	CIT	PAPOLG	EML5		ZNF592	SLC6A11	USP32		PLCXD3		ARHGAP33	SLC33A1		PDE7A	TNS1
LINS		NCOA1	LIMD1	CNOT6L	EPG5	EML5		COMMD3	RUFY2	USP32		ADAMTS5		ARHGAP33	CRCP		YTHDC1	TNS1
NAIF1		NCOA1	GCNT4	FIGN	FNBP4	EML5		TMPRSS15	ENKUR	APPBP2		RAB3B		NPHS1	ANXA2		GORASP2	RUFY4
ZNF175		NCOA1	NUDT3	GNPNAT1	RASSF8	FOXN3		TRIM23	ZNF507	APPBP2		LIFR		NFKBID	FRMD4A		KCNJ2	RUFY4
NEK1		NCOA1	PCBD2	EPHB4	STK35	FOXN3		MINPP1	SLC35D1	PPM1D		PSD3		SYNE4	PADI2		USP31	RUFY4
ACTR3		NCOA1	FAM124A	DNAH12	MIR17HG	EFCAB11		TM9SF3	KIAA0087	NACA2		VPS53		SYNE4	KLHDC10		BICD2	CXCR2
TOB2		NCOA1	SYNPO	CSGALNACT2	GAN	EFCAB11		C10orf32	MED6	INTS2		SOGA1		WDR62	KIAA1147		ZNF20	CXCR2
TFAP2B		CENPO	VWC2L	RAVER2	PABPC1L2A	EFCAB11		USP49	EFCAB13	INTS2		KIAA2022		WDR62	HNRNPAB		C18orf54	CXCR1
SEC14L3		CENPO	FAM179B	CEP97	TAF9B	EFCAB11		LPGAT1	ERCC4	MED13		FIGN		WDR62	BICD1		NUP133	CXCR1
AC007952.5		CENPO	DCDC2	WNT2B	CHP1	EFCAB11		CASZ1	CDKN2B	METTL2A		ELAVL1		WDR62	UHMK1		PPP3R1	CXCR1
PRKCA		ADCY3	PGBD4	GOLGA8IP	BCL6B	NRDE2		PPP2R2C	GPR27	MRC2		NOVA2		OVOL3	AGO3		STUM	ARPC2
FAM72A		ADCY3	MXI1	ADCY7	BCCIP	NRDE2		ZNF330	OSGEPL1	TANC2		CNOT6L		OVOL3	APAF1		USP36	ARPC2
FAM72C		ADCY3	ATXN3	EXOC5	ZBED4	CALM1		ALS2CR8	EID1	TANC2		PLEKHG4B		ZFP14	GALNT13		NDEL1	ARPC2
PSIP1		DNAJC27	TBL1XR1	SCAF11	VAPA	CALM1		CAND2	ERMP1	TANC2		WASF2		ZFP14	NFATC3		IL16	ARPC2
RP4-604K5.1		DNAJC27	SMAD2	GGA1	SLC38A1	TTC7B		PLA2G12A	SC5D	TANC2		KDSR		ZNF566	EIF2AK2		SNN	GPBAR1
NUCB2		DNAJC27	FUBP1	PPIG	MATR3	DGLUCY		HNRNPH3	SLC30A7	TANC2		PRKAA2		ZNF566	RAB3GAP2		CHD7	GPBAR1
CASP1		DNAJC27	EML5	ZNF259	ZNF644	DGLUCY		CXCL9	NUDT19	TANC2		GTPBP10		ZNF566	RAP1A		GRAMD2B	GPBAR1
NHLRC3		EFR3B	MYEF2	SASH1	SLC17A6	DGLUCY		PLN	SUV39H2	CYB561		POC1B-GALNT4		ZNF566	MAP3K9		TAL1	AAMP
MCHR2		EFR3B	SOGA3	CAPRIN1	DTX4	DGLUCY		RDH10	SH2D1B	ACE		BRWD3		ZNF566	SOX5		BEND3	AAMP
VEPH1		DNMT3A	LAMP1	MAPRE1	BSN	DGLUCY		GOLGA8IP	KCNJ3	ACE		ADAM12		ZNF566	PIGA		SMIM14	PNKD
WFDC13		DNMT3A	TSC22D2	PPP1R15B	KLHDC10	DGLUCY		PAPSS1	LPGAT1	ACE		DENND5B		ZNF566	LHX6		EEF2K	PNKD
RWDD1		DTNB	MACF1	MTMR6	HNRNPF	DGLUCY		ZNF654	OSBP	ACE		SLC35E3		ZNF566	TSSC1		ORAOV1	PNKD
DGCR8		DTNB	FPR1	TFDP2	NFIC	GPR68		REEP5	SLC5A12	ACE		TM9SF3		ZNF260	STRN			PNKD
PHF3		DTNB	ABCB7	C7	PEX2	CCDC88C		FBXO33	RALBP1	KCNH6		VIL1		CHD7	TMEM167B			TMBIM1
ZSCAN12		DTNB	TUBB6	TMSB15B	YPEL5	CCDC88C		SGMS1	COPA	KCNH6		PEX26		SSBP2	DTWD1			TMBIM1
TRIM2		DTNB	RGPD1	PDE8A	CLIP4	PPP4R3A		C22orf39	CCDC91	KCNH6		ZNF430		SSBP2	ZNF318			TMBIM1
H2AFJ		DTNB	KLHL3	PTPN2	RGPD6	CATSPERB		GOLGA8B	PDHA1	KCNH6		HRK		SSBP2	TBCK			TMBIM1
MPP7		DTNB	PTGER3	RUFY2	MTR	TC2N		NUP43	EXOG	TACO1		EFCAB11		SSBP2	BCAP29			PNKD
CDC7		DTNB	ZBTB37	PANK3	FOXQ1	TC2N		BASP1	FGF9	MAP3K3		ZHX2		SSBP2	C16orf52			CATIP
PIK3R1		ASXL2	MTUS2	SLC6A5	PKNOX1	TC2N		UTP23	CDHR1	MAP3K3		PARK2		SSBP2	MIS18BP1			SLC11A1
ASRGL1		KIF3C	TSC1	BNC1	PEG10	FBLN5		PCDH8	ZNF304	MAP3K3		SLC35D1		SSBP2	CCDC50			VIL1
C6orf118		RAB10	TIMM8B	NRP1	ARFGAP1	FBLN5		BCL2L11	TM2D2	MAP3K3		MID1		ALDH3B2	SSUH2			USP37
MMRN2		GAREM2	FUNDC2	ATP1A2	C12orf4	FBLN5		ATG10	CASC1	MAP3K3		CCDC149		RUNX1	MALT1			CNOT9
KIAA2026		GAREM2	LRRC8C	TMEM9B	FRS2	FBLN5		TTC33	MTMR11	MAP3K3		SAMHD1		RUNX1	ZNF721			CNOT9
GLRX3		HADHA	ICK	SPHK2	TLE1	TRIP11		ITGB1BP1	RTL8C	LIMD2		ENY2		HECW2	SEC14L3			CNOT9
SERPINB9		HADHB	MDN1	COX10	SNRK	ATXN3		ETNK1	IAH1	LIMD2		PDE4C		HECW2	KNG1			PLCD4
ERCC6		HADHB	FRMD4A	SRSF7	NT5DC3	ATXN3		YTHDC1	PSTPIP2	STRADA		HRH4		HECW2	GPR161			PLCD4
LOXL4		HADHB	SGK3	SCAMP4	GNPNAT1	ATXN3		CLASP1	EPHA5	STRADA		ANKS6		HECW2	FCRL1			PLCD4
CFHR3		ADGRF3	KLF12	LYPD6B	SLC2A3	ATXN3		KRTAP3-2	COMMD3-BMI1	STRADA		C6orf120		C2orf66	LAMB4			PLCD4
SPOCK3		ADGRF3	RGPD2	ACADSB	TXLNA	ATXN3		TMEM68	ZBTB7C	STRADA		LRRC58		SPAG9	C1orf27			PLCD4
LONRF1		ADGRF3	SLC24A4	PQLC3	PPM1A	ATXN3		LDHC	RALGAPB	STRADA		TCF3		SPAG9	AGPAT9			ZNF142
TNFAIP8L3		ADGRF3	KCTD7	CHTOP	ITGA5	ATXN3		NIPSNAP3B	IRX5	STRADA		ATP7A		SPAG9	CBWD3			ZNF142
NEK2		ADGRF3	TNPO1	ZNF430	CDC42SE2	CPSF2		DERL1	APBB2	CCDC47		ACADSB		NME1-NME2	ZNF582			BCS1L
KIAA1524		ADGRF3	MAN1A1	RAN	ZNF417	CPSF2		MAPRE1	ANKRD34B	DDX42		ITGA9		NME2	ANKRD31			BCS1L
EIF2AK1		ADGRF3	MKI67	PXDN	RAP1A	SLC24A4		C15orf61	TPD52L1	DDX42		ZNF154		NME2	LRRIQ3			BCS1L
GFRAL		ADGRF3	DNAJC10	A4GNT	2020-03-03	SLC24A4		LEPROTL1	CHD6	DDX42		TPP1		NME2	AC093157.1			BCS1L
SPATA6		ADGRF3	HSPA6	S1PR1	ZNF304	SLC24A4		TFIP11	BNIP2	DDX42		DCLK3		NME2	TIMM8A			BCS1L
FOXP1		ADGRF3	HS6ST3	SYAP1	PABPC1L2B	SLC24A4		ZNF780A	ARHGAP29	DDX42		PPARGC1A		NME2	PPRC1			BCS1L
IGF2R		DRC1	ZNF207	SLC6A6	PDRG1	SLC24A4		ANLN	CDH20	DDX42		RRP8		MBTD1	SMIM17			STK36
PRR15		OTOF	OPA3	SLC16A10	STAU2	RIN3		KDM1B	CLCN6	FTSJ3		PLXNA4		MBTD1	C1orf143			STK36
C17orf80		OTOF	TTC30A	DKC1	PDLIM2	GOLGA5		OPHN1	PTGDR	SCN4A		PI15		STXBP4	MAGEE2			STK36
PRKRA		OTOF	ENOX2	RD3	PPARGC1B	SMIM7		KCNMB1	SOX5	PRR29		MTAP		STXBP4	SRSF11			STK36
LRGUK		OTOF	GCLM	FGF5	RCC2	SMIM7		MAMDC2	SNX17	PRR29		NUP43		STXBP4	ENSA			STK36
LARP4B		OTOF	WDTC1	CYP2U1	RASAL2	NWD1		PHACTR3	ACOT7	PRR29		PEAK1		STXBP4	HOXA2			STK36
[truncated: 48,767 more rows]
